# Supplementary material
Source: publisher figshare collection journal article supplement (https://geolsoc.figshare.com/ndownloader/files/6863748)
Supplement: Supplementary file 1 [file 6863748]

## Sheet: Zircon Hf
Sample Information								Corrected ratios with propagated uncertainties									Correction factors derived from standards			Standard uncertainties for propagation			Un-normalised data, with unpropagated uncertainties
Mount	Sample	Grain (Hf)	Grain (U-Pb)	Session	Age	± 2σ		176Lu/177Lu	± 2SE	176Hf/177Hf	± 2SE	176Hf/177Hf(i)	εHf (i)	± 2SE	TDM*		F(LuHf)	F(JMC)		2σ LuHf%	2σ HfHf%		176Hf/177Hf	± 2SE	178Hf/177Hf	± 2SE	180Hf/177Hf	± 2SE	176Yb/177Yb	± 2SE	176Lu/177Lu	± 2SE	Total Hf (V)	on	of
Sample BS01 - Nile Trunk, Beni Suef, Egypt (modern river sand)
NDZ15	BS01	1	1	16	609.402	24.2046		0.000593	3.2e-05	0.282561	1.9e-05	0.282554	5.46365	1.22189	1119.03		Iolite						0.282539	1.9e-05	1.46725	5.5e-05	1.88676	8.3e-05	0.0299	0.001	0.000601	3.2e-05	13.52	27.645
NDZ15	BS01	2	2	16	1963.23	15.6142		0.000461	9.5e-06	0.281457	2.1e-05	0.28144	-3.15342	1.11518	2689.1		Iolite						0.281435	2.1e-05	1.4672	6.6e-05	1.88663	7.5e-05	0.02158	0.00069	0.000468	9.6e-06	19.06	26.596
NDZ15	BS01	3	3	16	599.398	22.5511		0.000509	3.2e-05	0.282296	1.7e-05	0.28229	-4.10774	1.11488	1644.51		Iolite						0.282275	1.7e-05	1.46721	4.2e-05	1.88673	8.2e-05	0.0269	0.0024	0.000517	3.2e-05	16.34	27.649
NDZ15	BS01	4	4	16	840.729	31.9835		0.000706	1.1e-05	0.282486	1.8e-05	0.282475	7.87358	1.35308	1172.11		Iolite						0.282464	1.8e-05	1.46722	3.7e-05	1.88671	9.5e-05	0.02888	0.00068	0.000718	1.1e-05	13.88	27.647
NDZ15	BS01	5	5	16	820.82	31.8047		0.000936	3.7e-05	0.282572	1e-05	0.282558	10.3533	1.07527	1016.98		Iolite						0.28255	1e-05	1.46724	3.3e-05	1.88674	8.4e-05	0.041	0.0022	0.000952	3.7e-05	17.47	27.648
NDZ15	BS01	6	6	16	728.382	27.0034		0.000678	6.5e-05	0.282559	1.9e-05	0.28255	7.98692	1.30337	1074.31		Iolite						0.282537	1.9e-05	1.46723	4.7e-05	1.88667	7.1e-05	0.0297	0.0028	0.00069	6.6e-05	19.2	27.646
NDZ15	BS01	7	7	16	624.986	24.664		0.0004347	4.8e-06	0.282656	1.3e-05	0.282651	9.23846	1.01117	919.852		Iolite						0.282634	1.3e-05	1.46726	4.1e-05	1.88675	8.4e-05	0.02111	0.00045	0.0004424	4.9e-06	18.88	27.648
NDZ15	BS01	8	8	16	316.769	11.4872		0.001352	1.5e-05	0.282451	2.1e-05	0.282443	-5.03951	0.992922	1469.93		Iolite						0.282429	2.1e-05	1.46726	4e-05	1.88666	8.7e-05	0.0799	0.0032	0.001377	1.5e-05	14.54	26.599
NDZ15	BS01	9	9	16	767.971	31.6996		0.00134	0.00011	0.282611	1.8e-05	0.282592	10.366	1.38458	973.118		Iolite						0.282589	1.8e-05	1.46725	6.1e-05	1.88672	7.3e-05	0.0586	0.0045	0.00136	0.00012	15.82	27.646
NDZ15	BS01	10	10	16	601.925	23.8563		0.00107	0.00013	0.282211	1.4e-05	0.282199	-7.2865	1.0694	1822.57		Iolite						0.282189	1.4e-05	1.46728	4.9e-05	1.88677	0.00011	0.0533	0.0072	0.00109	0.00013	15.3	26.6
NDZ15	BS01	11	11	16	2632.73	14.5541		0.000428	3.9e-05	0.281112	1.7e-05	0.28109	0.035306	1.01268	3058.68		Iolite						0.28109	1.7e-05	1.46728	4.1e-05	1.88672	7.8e-05	0.0195	0.0015	0.000436	4e-05	16.91	27.649
NDZ15	BS01	12	12	16	604.944	52.1343		0.001832	2.7e-05	0.282514	1.3e-05	0.282493	3.2016	1.58243	1241.99		Iolite						0.282492	1.3e-05	1.46724	3.6e-05	1.88682	6.8e-05	0.0826	0.0024	0.00187	2.8e-05	24.92	27.646
NDZ15	BS01	13	13	16	995.332	40.3538		0.0007242	6.7e-06	0.281923	1.5e-05	0.281909	-8.66061	1.43172	2212.47		Iolite						0.281901	1.5e-05	1.46723	3.9e-05	1.88673	6.3e-05	0.03475	0.00031	0.0007396	6.9e-06	18.33	27.647
NDZ15	BS01	14	14	16	587.02	21.3663		0.002025	3.7e-05	0.282704	1.6e-05	0.282682	9.47251	1.03377	875.747		Iolite						0.282681	1.6e-05	1.46726	4e-05	1.88674	8.5e-05	0.1003	0.0028	0.002069	3.7e-05	18.76	27.646
NDZ15	BS01	15	15	16	616.741	22.6995		0.000426	2.6e-05	0.282185	1.8e-05	0.28218	-7.62009	1.15269	1852.85		Iolite						0.282163	1.8e-05	1.46721	3.3e-05	1.88675	9.5e-05	0.0211	0.0018	0.000435	2.7e-05	19.3	27.646
NDZ15	BS01	16	16	16	788.096	28.7838		0.00329	0.0001	0.282552	1.6e-05	0.282503	7.68718	1.20859	1139.7		Iolite						0.282529	1.6e-05	1.46721	4.4e-05	1.88666	8.7e-05	0.1772	0.0051	0.00336	0.0001	20.31	27.637
NDZ15	BS01	17	17	16	2007.55	13.6146		0.000675	1.8e-05	0.281246	1.7e-05	0.28122	-9.92757	0.937465	3090.69		Iolite						0.281224	1.7e-05	1.46723	4.4e-05	1.88667	0.00011	0.0336	0.0013	0.000691	1.9e-05	16.77	27.646
NDZ15	BS01	18	18	16	610.045	21.5811		0.0002365	3.3e-06	0.282546	1.4e-05	0.282543	5.09154	0.979788	1140.39		Iolite						0.282523	1.4e-05	1.46723	4.7e-05	1.88672	9.1e-05	0.011	0.00025	0.0002422	3.3e-06	20.12	27.648
NDZ15	BS01	20	20	16	597.64	22.3589		0.000544	4.1e-05	0.282678	2.1e-05	0.282672	9.36596	1.25608	890.397		Iolite						0.282656	2.1e-05	1.46724	3.6e-05	1.88673	8.3e-05	0.0285	0.0027	0.000558	4.2e-05	18.06	27.645
NDZ15	BS01	21	21	16	608.124	22.9779		0.001299	3.1e-05	0.282628	1.6e-05	0.282613	7.52197	1.07725	1002.56		Iolite						0.282605	1.6e-05	1.46724	3.6e-05	1.88683	9.3e-05	0.0483	0.00078	0.001333	3.2e-05	18.71	26.596
NDZ15	BS01	22	22	16	571.471	22.9427		0.000874	1.4e-05	0.28263	2.1e-05	0.282621	6.96124	1.25212	1004.25		Iolite						0.282607	2.1e-05	1.46721	4.3e-05	1.8867	8.9e-05	0.0433	0.0015	0.000898	1.5e-05	14.29	27.648
NDZ15	BS01	25	25	16	598.498	25.5834		0.001007	2.2e-05	0.282216	1.4e-05	0.282205	-7.15892	1.06302	1812.78		Iolite						0.282193	1.4e-05	1.46725	4e-05	1.88669	0.00011	0.0485	0.002	0.001036	2.3e-05	14.17	27.648
NDZ15	BS01	26	26	16	622.094	24.472		0.000834	4.2e-05	0.282602	1.5e-05	0.282592	7.09645	1.08704	1037.8		Iolite						0.282579	1.5e-05	1.46727	4.8e-05	1.88674	7.8e-05	0.0398	0.0018	0.000859	4.4e-05	17.18	26.594
NDZ15	BS01	28	28	16	627.366	25.4558		0.000252	1.8e-05	0.28257	1.4e-05	0.282567	6.3223	1.07294	1085.5		Iolite						0.282547	1.4e-05	1.4672	3.9e-05	1.88669	9.6e-05	0.01123	0.00091	0.00026	1.9e-05	18.51	27.647
NDZ15	BS01	29	29	16	2033.72	15.1731		0.000755	1.5e-05	0.281454	2.4e-05	0.281425	-2.05442	1.21738	2686.42		Iolite						0.28143	2.4e-05	1.46725	4.2e-05	1.8867	8.8e-05	0.03579	0.00062	0.000779	1.6e-05	18.83	26.594
NDZ15	BS01	30	30	16	647.141	24.179		0.001889	3.6e-05	0.282689	1.8e-05	0.282666	10.2729	1.16824	879.732		Iolite						0.282666	1.8e-05	1.46721	4.2e-05	1.88666	8e-05	0.0979	0.0033	0.00195	3.7e-05	19.25	27.646
NDZ15	BS01	31	31	16	795.589	29.1157		0.001027	9e-05	0.282556	1.3e-05	0.282541	9.18333	1.14862	1062		Iolite						0.282533	1.3e-05	1.46726	4.1e-05	1.88676	0.00011	0.0488	0.0046	0.001061	9.3e-05	17.21	27.648
NDZ15	BS01	33	33	16	873.366	32.4163		0.001256	2.7e-05	0.282381	1.9e-05	0.28236	4.55574	1.39633	1383.84		Iolite						0.282357	1.9e-05	1.46725	5e-05	1.88682	0.00012	0.0661	0.0013	0.001299	2.8e-05	15.84	27.648
NDZ15	BS01	34	34	16	577.567	25.2476		0.0002408	3.1e-06	0.282297	1.5e-05	0.282294	-4.45262	1.09604	1646.14		Iolite						0.282273	1.5e-05	1.46721	6.2e-05	1.88665	8.5e-05	0.01239	0.00042	0.0002491	3.1e-06	17.75	27.647
NDZ15	BS01	35	35	16	660.2	25.8406		0.000654	9.3e-05	0.28263	1.9e-05	0.282622	9.00472	1.28696	961.68		Iolite						0.282607	1.9e-05	1.46726	4.9e-05	1.88665	8.6e-05	0.0321	0.0054	0.000677	9.6e-05	16.7	27.646
NDZ15	BS01	36	36	16	570.414	21.2268		0.00075	2.5e-05	0.282422	2.4e-05	0.282414	-0.379651	1.32642	1413.97		Iolite						0.282398	2.4e-05	1.46727	3.5e-05	1.88668	9.4e-05	0.0412	0.0017	0.000777	2.6e-05	18.47	27.649
NDZ15	BS01	37	37	16	589.575	22.1794		0.00064	0.00015	0.282409	2.4e-05	0.282402	-0.375477	1.4005	1429.16		Iolite						0.282385	2.4e-05	1.46728	4.3e-05	1.88661	0.0001	0.0317	0.0071	0.00066	0.00016	15.2	27.647
NDZ15	BS01	38	38	16	718.757	29.0348		0.001038	8.4e-05	0.28236	1.9e-05	0.282346	0.552989	1.34984	1481.61		Iolite						0.282336	1.9e-05	1.46724	3.8e-05	1.88666	7.9e-05	0.0497	0.0056	0.001077	8.7e-05	15.63	27.649
NDZ15	BS01	39	39	16	1038.45	39.804		0.000882	3.7e-05	0.28182	1.9e-05	0.281803	-11.4644	1.57973	2400.33		Iolite						0.281796	1.9e-05	1.46723	3.9e-05	1.88669	9.8e-05	0.04282	0.00088	0.000915	3.9e-05	20.03	27.652
NDZ15	BS01	40	40	16	890.603	36.7636		0.000948	1.1e-05	0.282065	1.5e-05	0.282049	-6.08215	1.34695	1987		Iolite						0.282041	1.5e-05	1.46723	4.8e-05	1.88675	7.7e-05	0.0472	0.0013	0.000984	1.2e-05	21.84	26.596
NDZ15	BS01	41	41	16	2039.81	18.2549		0.00129	0.00016	0.281441	1.8e-05	0.281391	-3.11726	1.26958	2748.94		Iolite						0.281415	1.8e-05	1.46718	4e-05	1.88678	7e-05	0.0507	0.0064	0.00136	0.00017	24.8	28.699
NDZ15	BS01	42	42	16	833.194	29.9561		0.001456	2.3e-05	0.282582	1.7e-05	0.282559	10.6906	1.2645	1008.16		Iolite						0.282555	1.7e-05	1.46725	6.2e-05	1.88674	9.6e-05	0.0556	0.0016	0.001535	2.4e-05	23.79	28.7
NDZ15	BS01	43	43	16	715.379	27.3977		0.000877	4.9e-05	0.282392	1.6e-05	0.28238	1.68935	1.19312	1415.63		Iolite						0.282365	1.6e-05	1.46719	6.5e-05	1.88668	9.5e-05	0.0328	0.0025	0.000925	5.2e-05	29.8	30.572
NDZ15	BS01	45	45	16	580.086	25.5959		0.000556	1.6e-05	0.282627	1.8e-05	0.282621	7.16665	1.21056	999.721		Iolite						0.282601	1.8e-05	1.46728	3.7e-05	1.88674	6.9e-05	0.02032	0.0008	0.000586	1.7e-05	20.14	28.7
NDZ15	BS01	47	47	16	638.96	24.2546		0.000558	3.9e-05	0.282554	1.4e-05	0.282547	5.88467	1.05062	1119.43		Iolite						0.282527	1.4e-05	1.46724	4.7e-05	1.8866	7.7e-05	0.0215	0.0017	0.000588	4.1e-05	24.24	28.702
NDZ15	BS01	48	48	16	621.989	23.6092		0.001053	1.9e-05	0.282729	1.4e-05	0.282717	11.5007	1.01951	790.055		Iolite						0.282702	1.4e-05	1.46721	5.4e-05	1.88676	6.7e-05	0.03938	0.00092	0.001111	2e-05	22.12	28.701
NDZ15	BS01	49	49	16	580.071	21.4591		0.000484	2.8e-05	0.28241	1.5e-05	0.282405	-0.489498	1.01814	1427.86		Iolite						0.282383	1.5e-05	1.4672	2.9e-05	1.8867	9.3e-05	0.0199	0.0014	0.000511	2.9e-05	24.71	29.75
NDZ15	BS01	50	50	16	447.817	18.4581		0.000914	4.5e-05	0.282713	1.6e-05	0.282705	7.1811	0.983447	891.439		Iolite						0.282686	1.6e-05	1.46725	5.4e-05	1.88676	6.8e-05	0.0334	0.0014	0.000964	4.8e-05	23.03	28.698
NDZ15	BS01	51	51	16	815.46	30.8743		0.00134	0.0001	0.282561	1.6e-05	0.28254	9.62578	1.29429	1053.4		Iolite						0.282534	1.6e-05	1.4672	4.5e-05	1.88674	7.2e-05	0.0458	0.004	0.00141	0.00011	24.61	29.751
NDZ15	BS01	52	52	16	668.492	25.2143		0.001635	5.2e-05	0.282661	1.8e-05	0.28264	9.84891	1.20277	920.997		Iolite						0.282634	1.8e-05	1.46736	6.8e-05	1.88654	0.00012	0.05902	0.0008	0.001723	5.5e-05	18.8	27.647
NDZ15	BS01	53	53	16	654.357	24.4767		0.00079	0.00013	0.282163	1.6e-05	0.282153	-7.72226	1.16359	1888.53		Iolite						0.282136	1.6e-05	1.46721	6.4e-05	1.88671	9.7e-05	0.0307	0.0052	0.00083	0.00013	23.42	28.697
NDZ15	BS01	54	54	16	677.844	25.8263		0.00046	0.00014	0.282328	2.2e-05	0.282322	-1.21315	1.41905	1546.83		Iolite						0.282301	2.2e-05	1.46732	9.5e-05	1.88653	0.00014	0.0182	0.0052	0.00048	0.00015	27.2	22.386
NDZ15	BS01	57	57	16	774.899	28.7337		0.001039	7e-05	0.282568	1.3e-05	0.282553	9.14874	1.12771	1047.07		Iolite						0.282541	1.3e-05	1.46722	5.3e-05	1.88681	8.5e-05	0.0378	0.0032	0.001095	7.4e-05	23.8	28.698
NDZ15	BS01	58	58	16	591.131	22.7898		0.001185	9.6e-05	0.282635	1.4e-05	0.282622	7.44687	1.03011	992.964		Iolite						0.282608	1.4e-05	1.46724	5.9e-05	1.88675	0.00011	0.045	0.0043	0.00125	0.0001	21.3	28.698
NDZ15	BS01	59	59	16	431.608	21.1195		0.00222	0.00034	0.282729	1.6e-05	0.282711	7.01898	1.11137	887.397		Iolite						0.282702	1.6e-05	1.46723	5.9e-05	1.8867	0.00012	0.097	0.016	0.00234	0.00036	16.66	28.697
NDZ15	BS01	60	60	16	799.889	31.786		0.000805	9.4e-05	0.282504	1.4e-05	0.282492	7.55396	1.24998	1156.75		Iolite						0.282477	1.4e-05	1.4672	5.1e-05	1.88664	6e-05	0.0285	0.0035	0.000847	9.9e-05	23.31	28.7
NDZ15	BS01	61	61	16	1034.18	39.1125		0.0006829	6.8e-06	0.281779	1.4e-05	0.281766	-12.8741	1.37043	2473.9		Iolite						0.281751	1.4e-05	1.46721	6.8e-05	1.8868	9.7e-05	0.02672	0.00095	0.0007185	7.2e-06	26.3	28.699
NDZ15	BS01	62	62	16	727.8	29.3838		0.000942	4.6e-05	0.282635	1.6e-05	0.282622	10.5378	1.23524	930.668		Iolite						0.282607	1.6e-05	1.46722	5.2e-05	1.88672	7.2e-05	0.0319	0.0017	0.000991	4.8e-05	23.8	28.7
NDZ15	BS01	63	63	16	735.766	28.8313		0.001493	5.4e-05	0.282063	1.7e-05	0.282042	-9.81839	1.25095	2068.99		Iolite						0.282036	1.7e-05	1.46725	5.3e-05	1.88669	0.00011	0.0516	0.0017	0.00157	5.7e-05	24.62	28.699
NDZ15	BS01	64	64	16	983.295	40.0787		0.000803	1.7e-05	0.282125	1.5e-05	0.28211	-1.82033	1.43086	1826.36		Iolite						0.282097	1.5e-05	1.46724	5.4e-05	1.88678	9.9e-05	0.0322	0.0012	0.000844	1.8e-05	21.8	29.749
NDZ15	BS01	65	65	16	602.692	24.307		0.00083	3.1e-05	0.282566	1.3e-05	0.282557	5.39716	1.00718	1117.31		Iolite						0.282538	1.3e-05	1.46729	8.3e-05	1.88667	0.00011	0.0321	0.001	0.000872	3.3e-05	24	27.645
NDZ15	BS01	66	66	16	593.758	22.9404		0.000543	2.1e-05	0.28222	1.5e-05	0.282214	-6.93721	1.04732	1796.73		Iolite						0.282192	1.5e-05	1.46726	4.2e-05	1.8868	6.9e-05	0.0224	0.0012	0.00057	2.2e-05	21.42	28.699
NDZ15	BS01	67	67	16	204.105	8.79657		0.001316	4e-05	0.282612	2e-05	0.282607	-1.7528	0.901816	1196.1		Iolite						0.282584	2e-05	1.46723	6.7e-05	1.88665	0.00011	0.0567	0.0022	0.001382	4.1e-05	14.81	28.047
NDZ15	BS01	68	68	16	577.66	26.5818		0.000624	1.1e-05	0.282457	1.9e-05	0.28245	1.06741	1.26417	1339.13		Iolite						0.282429	1.9e-05	1.46717	5.1e-05	1.8867	0.00011	0.02485	0.00047	0.000655	1.1e-05	21.23	28.699
NDZ15	BS01	69	69	16	586.683	23.7329		0.0003021	4.3e-06	0.282414	1.3e-05	0.282411	-0.130253	0.991266	1413.17		Iolite						0.282385	1.3e-05	1.4672	5.7e-05	1.88672	8.8e-05	0.01169	0.00028	0.000317	4.5e-06	25.78	28.699
NDZ15	BS01	71	71	16	590.071	25.4284		0.00149	0.00012	0.282578	1.4e-05	0.282561	5.28568	1.09206	1113.32		Iolite						0.28255	1.4e-05	1.4672	4.1e-05	1.88661	0.00011	0.0704	0.006	0.00156	0.00012	24.42	28.698
NDZ15	BS01	72	72	16	549.244	22.5779		0.000667	6.7e-05	0.282581	1.5e-05	0.282574	4.81497	1.05438	1106.61		Iolite						0.282553	1.5e-05	1.46723	6.3e-05	1.88674	0.00011	0.0274	0.0026	0.000699	7e-05	19.31	28.699
NDZ15	BS01	73	73	16	719.296	25.7163		0.000925	3.1e-05	0.281892	1.9e-05	0.281879	-15.9574	1.25175	2392.65		Iolite						0.281863	1.9e-05	1.46722	4.7e-05	1.88661	8.8e-05	0.0334	0.00045	0.000969	3.2e-05	35.1	28.701
NDZ15	BS01	74	74	16	989.612	35.8682		0.000704	6.2e-05	0.281641	1.3e-05	0.281628	-18.7685	1.29872	2759.39		Iolite						0.281613	1.3e-05	1.46725	5.6e-05	1.88673	8e-05	0.0258	0.0025	0.000738	6.5e-05	28.89	29.748
NDZ15	BS01	76	76	16	595.931	21.6242		0.001131	2.2e-05	0.282654	1.3e-05	0.282641	8.24533	0.94004	952.016		Iolite						0.282625	1.3e-05	1.46717	5.2e-05	1.8867	9.5e-05	0.04105	0.0008	0.001184	2.3e-05	24.88	29.753
NDZ15	BS01	77	77	16	1028.24	37.8373		0.000481	1.4e-05	0.282224	1.8e-05	0.282215	2.90565	1.49538	1601.07		Iolite						0.282195	1.8e-05	1.46725	4.2e-05	1.88671	0.00011	0.01847	0.00052	0.000503	1.5e-05	27.15	28.697
NDZ15	BS01	78	78	16	985.414	35.7206		0.00099	1.3e-05	0.282023	1.2e-05	0.282005	-5.51165	1.22044	2031.56		Iolite						0.281994	1.2e-05	1.4672	6.1e-05	1.88673	8.3e-05	0.0371	0.0008	0.001035	1.4e-05	25.08	28.704
NDZ15	BS01	79	79	16	580.715	21.3834		0.0007529	5.1e-06	0.282454	1.4e-05	0.282446	0.978785	0.968103	1346.54		Iolite						0.282425	1.4e-05	1.4672	5.4e-05	1.88673	9.2e-05	0.03101	0.00086	0.0007871	5.3e-06	19.24	28.699
NDZ15	BS01	80	80	16	944.898	34.4333		0.000572	5.9e-05	0.282405	1.7e-05	0.282395	7.39858	1.4091	1283.45		Iolite						0.282376	1.7e-05	1.46729	6e-05	1.88675	7e-05	0.0197	0.0023	0.000597	6.2e-05	26.4	28.695
NDZ15	BS01	81	81	16	580.806	22.829		0.0003141	7.4e-06	0.282188	1.5e-05	0.282185	-8.26821	1.04248	1859.97		Iolite						0.282156	1.5e-05	1.46725	5.3e-05	1.88677	5.9e-05	0.01229	0.00036	0.0003279	7.7e-06	24.8	28.699
NDZ15	BS01	83	83	16	1040.27	38.7411		0.0004952	2.3e-06	0.282128	1.6e-05	0.282118	-0.237676	1.43599	1784.83		Iolite						0.282096	1.6e-05	1.46721	4.1e-05	1.88668	8.9e-05	0.018293	8.1e-05	0.0005174	2.4e-06	27.06	29.749
NDZ15	BS01	84	84	16	814.831	30.0301		0.000885	6.1e-05	0.282503	1.7e-05	0.282489	7.80484	1.29832	1154.88		Iolite						0.282472	1.7e-05	1.46721	5.2e-05	1.88663	0.0001	0.0273	0.0023	0.000925	6.4e-05	20.98	28.697
NDZ15	BS01	85	85	16	1061.11	39.1783		0.00064	3.2e-05	0.282139	1.4e-05	0.282126	0.515697	1.39344	1760		Iolite						0.282107	1.4e-05	1.46721	5.7e-05	1.88674	7.7e-05	0.0226	0.0012	0.000669	3.4e-05	25.59	29.75
NDZ15	BS01	87	87	16	836.533	31.7628		0.001031	5.3e-05	0.282524	1.7e-05	0.282508	8.94538	1.33015	1108.71		Iolite						0.282492	1.7e-05	1.46726	5.7e-05	1.88672	0.0001	0.0331	0.0015	0.001079	5.6e-05	23.6	29.75
NDZ15	BS01	88	88	16	950.374	34.7028		0.00106	0.00018	0.282076	1.7e-05	0.282057	-4.44854	1.4828	1944.91		Iolite						0.282044	1.7e-05	1.46725	4.5e-05	1.88661	9.3e-05	0.0429	0.008	0.00111	0.00019	23.5	29.748
NDZ15	BS01	89	89	16	681.129	25.4112		0.00276	0.00033	0.282549	1.9e-05	0.282514	5.64274	1.35456	1167.2		Iolite						0.282517	1.9e-05	1.46722	5e-05	1.88673	0.00011	0.0968	0.0096	0.00289	0.00035	15.82	28.7
NDZ15	BS01	90	90	16	652.221	26.9315		0.000393	1.4e-05	0.282544	1.5e-05	0.282539	5.89611	1.13765	1129.55		Iolite						0.282512	1.5e-05	1.46724	4.7e-05	1.88681	0.0001	0.01407	0.00057	0.000411	1.5e-05	15.89	28.7
NDZ15	BS01	91	91	16	631.471	26.2697		0.000672	3.1e-05	0.282465	1.5e-05	0.282457	2.51907	1.12476	1301.57		Iolite						0.282433	1.5e-05	1.46724	5.4e-05	1.88667	7.9e-05	0.0259	0.0011	0.000704	3.3e-05	21.06	28.695
NDZ15	BS01	92	92	16	2682.62	19.5539		0.0018	0.00014	0.28082	1.6e-05	0.280727	-11.7082	1.26206	3726.41		Iolite						0.280788	1.6e-05	1.46722	5.7e-05	1.88668	8.6e-05	0.0611	0.005	0.00188	0.00015	23.7	28.699
NDZ15	BS01	93	93	16	1867.62	16.5953		0.000955	3.1e-05	0.281547	1.1e-05	0.281513	-2.76104	0.802659	2590.66		Iolite						0.281515	1.1e-05	1.4672	5.1e-05	1.88665	6.8e-05	0.0341	0.0012	0.001001	3.2e-05	20.59	28.697
NDZ15	BS01	94	94	16	838.699	30.5784		0.000892	3.4e-05	0.282494	1.1e-05	0.28248	8.00788	1.08339	1162.95		Iolite						0.282461	1.1e-05	1.46725	4.3e-05	1.88671	6.7e-05	0.0301	0.0015	0.000936	3.6e-05	23.17	28.699
NDZ15	BS01	95	95	16	636.653	27.594		0.000761	5e-05	0.28241	1.8e-05	0.282401	0.647988	1.26711	1410.1		Iolite						0.282377	1.8e-05	1.46732	9.1e-05	1.88653	0.00013	0.02514	0.00094	0.000798	5.2e-05	18.2	23.439
NDZ15	BS01	96	96	16	596.932	27.0024		0.0004557	4.9e-06	0.282224	1.8e-05	0.282219	-6.69067	1.23851	1785.63		Iolite						0.282191	1.8e-05	1.46725	4.2e-05	1.88671	9.6e-05	0.01704	0.00035	0.000478	5.1e-06	21.14	29.748
NDZ15	BS01	97	97	16	621.516	26.3544		0.000689	7.2e-05	0.281936	1.6e-05	0.281928	-16.4404	1.17798	2341.77		Iolite						0.281903	1.6e-05	1.46723	5.5e-05	1.88663	8.1e-05	0.0271	0.0027	0.000723	7.5e-05	20.59	28.699
NDZ15	BS01	98	98	16	638.006	24.3329		0.0001563	3.7e-06	0.282167	2.2e-05	0.282165	-7.67057	1.32587	1872.62		Iolite						0.282134	2.2e-05	1.46724	3.4e-05	1.88679	0.00013	0.00618	0.00017	0.000164	3.9e-06	21.24	28.701
NDZ15	BS01	99	99	16	834.715	31.4855		0.001211	4.6e-05	0.282531	1.4e-05	0.282512	9.05318	1.2098	1101.19		Iolite						0.282498	1.4e-05	1.46721	5.4e-05	1.88666	7.1e-05	0.0413	0.0015	0.001271	4.8e-05	22.42	29.751
NDZ15	BS01	100	100	16	782.98	30.3324		0.000924	5.4e-05	0.282524	1.1e-05	0.28251	7.82717	1.08604	1127.7		Iolite						0.282491	1.1e-05	1.46718	4.9e-05	1.88664	0.0001	0.0354	0.0022	0.00097	5.6e-05	21.8	28.697
NDZ15	BS01	101	101	16	815.152	31.6226		0.000653	1.4e-05	0.282516	1.7e-05	0.282506	8.39872	1.31191	1121.9		Iolite						0.282483	1.7e-05	1.46722	4.7e-05	1.88673	7.4e-05	0.02405	0.00052	0.000686	1.4e-05	21.67	28.697
NDZ15	BS01	102	102	16	796.063	30.6294		0.001051	9.2e-05	0.282652	1.5e-05	0.282636	12.5818	1.25366	871.545		Iolite						0.282619	1.5e-05	1.46725	3.1e-05	1.88665	8.1e-05	0.0345	0.0032	0.001104	9.6e-05	24.8	28.698
NDZ15	BS01	103	103	16	756.478	29.2363		0.00282	0.00021	0.282557	1.5e-05	0.282517	7.45689	1.24676	1126.87		Iolite						0.282524	1.5e-05	1.46721	5.1e-05	1.88662	9.4e-05	0.106	0.0087	0.00296	0.00022	22.9	28.694
NDZ15	BS01	104	104	16	755.177	28.4616		0.000912	6.5e-05	0.282498	1.8e-05	0.282485	6.30125	1.29728	1190.48		Iolite						0.282465	1.8e-05	1.46722	6.3e-05	1.88666	0.0001	0.0316	0.0019	0.000958	6.9e-05	21.22	29.12
NDZ15	BS01	105	105	16	844.336	32.4049		0.000805	3.7e-05	0.282506	2.1e-05	0.282493	8.60627	1.48194	1134.05		Iolite						0.282472	2.1e-05	1.46731	9.1e-05	1.8868	0.00016	0.02946	0.00088	0.000845	3.8e-05	11.32	28.698
NDZ15	BS01	106	106	16	521.101	21.8098		0.000915	5.7e-05	0.282546	1.6e-05	0.282537	2.86979	1.06391	1192.75		Iolite						0.282513	1.6e-05	1.46729	4.4e-05	1.88671	0.0001	0.0354	0.0026	0.000961	6e-05	21.26	28.698
NDZ15	BS01	108	108	16	749.703	33.222		0.000867	2.4e-05	0.282593	1.6e-05	0.282581	9.56854	1.31082	1002.98		Iolite						0.282559	1.6e-05	1.46724	4.8e-05	1.88668	8.7e-05	0.0313	0.0011	0.000911	2.6e-05	16.38	28.697
NDZ15	BS01	109	109	16	639.983	23.3201		0.00164	0.00011	0.282699	1.3e-05	0.282679	10.5809	1.00922	856.557		Iolite						0.282666	1.3e-05	1.46725	5.6e-05	1.88669	0.00011	0.063	0.0043	0.00172	0.00012	20.86	28.699
NDZ15	BS01	111	111	16	827.145	29.4641		0.000676	2.6e-05	0.282492	1.7e-05	0.282481	7.80179	1.27064	1165.07		Iolite						0.282459	1.7e-05	1.46727	6.5e-05	1.88676	0.0001	0.01964	0.00065	0.00071	2.7e-05	23.09	28.7
NDZ15	BS01	112	112	16	613.836	31.1863		0.000347	1.8e-05	0.282271	2.1e-05	0.282267	-4.60693	1.44599	1683.77		Iolite						0.282237	2.1e-05	1.46726	5.3e-05	1.88673	6.6e-05	0.01315	0.00057	0.000364	1.9e-05	18.28	28.7
NDZ15	BS01	113	113	16	689.202	32.6481		0.000481	2.3e-05	0.281674	2.2e-05	0.281668	-24.1331	1.51422	2814.32		Iolite						0.28164	2.2e-05	1.46729	4.5e-05	1.88668	8.1e-05	0.01847	0.00087	0.000505	2.4e-05	22.3	28.7
NDZ15	BS01	114	114	16	2655.79	15.9668		0.000851	8.4e-05	0.281043	1.3e-05	0.281	-2.65101	0.981207	3221.6		Iolite						0.281009	1.3e-05	1.46723	5.1e-05	1.88673	9.5e-05	0.0292	0.0027	0.000892	8.8e-05	21.4	29.748
NDZ15	BS01	115	115	16	960.332	39.3283		0.000913	9.6e-05	0.281858	1.3e-05	0.281841	-11.8613	1.39165	2359.85		Iolite						0.281824	1.3e-05	1.46725	5e-05	1.88664	0.0001	0.0343	0.0035	0.00096	0.0001	21.2	28.696
NDZ15	BS01	116	116	16	863.262	36.6411		0.000798	5.8e-05	0.282102	1.5e-05	0.282089	-5.28562	1.37559	1921.2		Iolite						0.282068	1.5e-05	1.4672	5.2e-05	1.88669	7.2e-05	0.028	0.0021	0.000836	6.1e-05	22.21	28.698
NDZ15	BS01	117	117	16	1088.21	40.7252		0.001421	3.3e-05	0.282432	1.6e-05	0.282403	10.9373	1.48022	1202.78		Iolite						0.282397	1.6e-05	1.46722	6.9e-05	1.88669	9.6e-05	0.0515	0.0016	0.001488	3.5e-05	19.8	28.701
NDZ15	BS01	118	118	16	793.471	30.7053		0.002066	4e-05	0.282608	1.6e-05	0.282577	10.4288	1.24083	990.41		Iolite						0.282573	1.6e-05	1.46724	5.6e-05	1.88676	6.8e-05	0.0749	0.0016	0.002162	4.2e-05	17.77	29.749
NDZ15	BS01	119	119	16	919.309	34.7223		0.0006812	5.1e-06	0.281923	1.6e-05	0.281911	-10.3188	1.34031	2242.73		Iolite						0.281888	1.6e-05	1.46723	5.5e-05	1.88677	9.8e-05	0.02616	0.00046	0.0007125	5.3e-06	18.7	28.697
NDZ15	BS01	120	120	16	2667.63	14.2508		0.000501	1.6e-05	0.281127	1.4e-05	0.281101	1.24551	0.85737	3021.94		Iolite						0.281092	1.4e-05	1.46724	3.4e-05	1.88675	9.1e-05	0.0172	0.00059	0.000523	1.7e-05	25.05	28.7
Sample ETH02A - Blue Nile, Aranja Bridge, Ethiopia (modern river sand)
NDZ04	ETH02A	1	1	2	513.263	21.5419		0.001338	0.00021336	0.282451	4.9836e-05	0.282438	-0.808764	2.30498	1391.87		1	1.00005		10.2894	0.0138147		0.282438	3.1e-05	1.46728	0.0001	1.88687	0.000206	0.055743	0.006441	0.001338	0.000163	4.96587	34	38
NDZ04	ETH02A	2	2	2	258.343	10.3212		0.001757	0.000197694	0.282466	5.44687e-05	0.282458	-5.83038	2.18094	1467.25		1	1.00005		10.2894	0.0138147		0.282453	3.8e-05	1.46733	8.8e-05	1.88681	0.000204	0.070623	0.001764	0.001757	8e-05	5.56194	27	31
NDZ04	ETH02A	3	3	2	677.986	27.8358		0.000709	7.29792e-05	0.282571	5.24304e-05	0.282562	7.28431	2.50609	1072.7		1	1.00005		10.2894	0.0138147		0.282558	3.5e-05	1.46721	0.00012	1.88681	0.000197	0.030167	0.000303	0.000709	2e-06	3.93861	34	38
NDZ04	ETH02A	4	4	2	814.601	31.8428		0.002258	0.000245398	0.282543	5.37835e-05	0.282508	8.47086	2.71643	1117.41		1	1.00005		10.2894	0.0138147		0.28253	3.7e-05	1.46724	9e-05	1.88684	0.000136	0.096393	0.004465	0.002258	7.9e-05	5.11798	35	39
NDZ04	ETH02A	5	5	2	739.406	40.1822		0.000935	0.000103075	0.282437	5.17542e-05	0.282424	3.78317	2.76924	1318.35		1	1.00005		10.2894	0.0138147		0.282424	3.4e-05	1.4673	6.8e-05	1.88681	0.000174	0.040476	0.002277	0.000935	3.7e-05	5.46659	35	38
NDZ04	ETH02A	6	6	2	592.008	27.6048		0.000546	9.53163e-05	0.282469	5.4469e-05	0.282463	1.84033	2.57939	1307.57		1	1.00005		10.2894	0.0138147		0.282456	3.8e-05	1.46734	9.2e-05	1.88678	0.000143	0.02441	0.00396	0.000546	7.7e-05	5.43936	35	37
NDZ04	ETH02A	7	7	2	638.44	24.7482		0.000257	2.94664e-05	0.282405	4.6884e-05	0.282402	0.725036	2.22664	1407.25		1	1.00005		10.2894	0.0138147		0.282392	2.6e-05	1.46732	8.3e-05	1.88677	0.000155	0.011687	0.000676	0.000257	1.3e-05	7.56684	38	38
NDZ04	ETH02A	8	8	2	1459.89	20.2837		0.001204	0.000124564	0.282087	4.79864e-05	0.282054	7.04571	2.27511	1722.51		1	1.00005		10.2894	0.0138147		0.282074	2.8e-05	1.46733	7.7e-05	1.88668	0.000142	0.047276	0.000459	0.001204	1.3e-05	5.79468	35	37
NDZ04	ETH02A	10	10	2	473.344	20.7431		0.000643	6.94136e-05	0.282325	4.47798e-05	0.282319	-5.91099	2.06449	1643.62		1	1.00005		10.2894	0.0138147		0.282312	2.2e-05	1.4673	6.6e-05	1.8868	0.000125	0.030675	0.000878	0.000643	2.1e-05	6.48311	35	39
NDZ04	ETH02A	11	11	2	819.33	33.6603		0.000515	5.30752e-05	0.282557	5.17667e-05	0.282549	10.0201	2.61458	1034.45		1	1.00005		10.2894	0.0138147		0.282544	3.4e-05	1.46746	0.000145	1.88705	0.000223	0.022302	0.000695	0.000515	3e-06	6.23475	18	20
NDZ04	ETH02A	13	13	2	612.161	27.5746		0.00098	0.000104388	0.282344	4.6877e-05	0.282333	-2.31699	2.30709	1555.34		1	1.00005		10.2894	0.0138147		0.282331	2.6e-05	1.46726	7.6e-05	1.88681	0.000133	0.044272	0.000635	0.00098	2.7e-05	5.0758	33	37
NDZ04	ETH02A	14	14	2	1147.72	45.5435		0.001864	0.000202832	0.282383	5.30842e-05	0.282343	10.1577	3.02515	1294.95		1	1.00005		10.2894	0.0138147		0.28237	3.6e-05	1.46734	8.4e-05	1.8867	0.000128	0.070356	0.002995	0.001864	6.6e-05	4.82133	33	37
NDZ04	ETH02A	18	18	2	25.2743	1.55455		0.001173	0.000121393	0.283135	4.86929e-05	0.283134	12.9213	1.75756	222.024		1	1.00005		10.2894	0.0138147		0.283122	2.9e-05	1.4673	6.5e-05	1.8866	0.000144	0.054891	0.000474	0.001173	1.3e-05	4.81951	36	39
NDZ04	ETH02A	20	20	2	561.097	25.3771		0.001104	0.000147444	0.282435	5.11025e-05	0.282423	-0.255904	2.41898	1399.57		1	1.00005		10.2894	0.0138147		0.282422	3.3e-05	1.46738	7.8e-05	1.88692	0.000138	0.049691	0.005396	0.001104	9.4e-05	5.09866	35	39
NDZ04	ETH02A	21	21	2	927.308	42.7875		0.000655	6.75807e-05	0.282122	4.74137e-05	0.282111	-3.07344	2.67479	1850.52		1	1.00005		10.2894	0.0138147		0.282109	2.7e-05	1.46725	8.3e-05	1.88677	0.000187	0.028918	0.000606	0.000655	5e-06	5.15161	36	40
NDZ04	ETH02A	22	22	2	749.923	33.5245		0.000761	8.35e-05	0.282131	4.79913e-05	0.28212	-6.73859	2.48304	1910.61		1	1.00005		10.2894	0.0138147		0.282118	2.8e-05	1.46728	0.0001	1.88672	0.000145	0.033636	0.001529	0.000761	2.9e-05	4.9924	35	39
NDZ04	ETH02A	24	24	2	836.703	33.3204		0.000793	9.51773e-05	0.282546	4.53058e-05	0.282534	9.86215	2.39725	1057.48		1	1.00005		10.2894	0.0138147		0.282533	2.3e-05	1.46722	8.5e-05	1.88689	0.000134	0.034238	0.002791	0.000793	4.9e-05	6.64141	35	39
NDZ04	ETH02A	25	25	2	805.689	32.6879		0.001086	0.00012325	0.282599	4.86335e-05	0.282583	10.8971	2.50789	974.1		1	1.00005		10.2894	0.0138147		0.282586	2.9e-05	1.4673	8.1e-05	1.88678	0.000174	0.039438	0.001668	0.001086	5.2e-05	5.52088	36	40
NDZ04	ETH02A	26	26	2	643.9	25.325		0.000537	5.87623e-05	0.282581	5.17692e-05	0.282575	6.96	2.42142	1063.18		1	1.00005		10.2894	0.0138147		0.282568	3.4e-05	1.4672	7.1e-05	1.88674	0.000127	0.019595	0.000532	0.000537	2e-05	7.19207	37	39
NDZ04	ETH02A	27	27	2	891.559	35.879		0.000813	8.3802e-05	0.282027	5.10595e-05	0.282013	-7.32741	2.65361	2056.31		1	1.00005		10.2894	0.0138147		0.282014	3.3e-05	1.46723	6.8e-05	1.88671	0.000134	0.034442	0.000345	0.000813	5e-06	6.21258	35	39
NDZ04	ETH02A	28	28	2	816.168	34.0844		0.001042	0.000108555	0.282521	5.24253e-05	0.282505	8.38703	2.6665	1123.38		1	1.00005		10.2894	0.0138147		0.282508	3.5e-05	1.46727	8.4e-05	1.88677	0.000221	0.041563	0.000673	0.001042	1.7e-05	4.23026	36	40
NDZ04	ETH02A	29	29	2	623.902	31.7482		0.000529	5.5738e-05	0.282579	5.58934e-05	0.282573	6.44911	2.70794	1075.57		1	1.00005		10.2894	0.0138147		0.282566	4e-05	1.46727	7.2e-05	1.88683	0.000188	0.024546	0.000755	0.000529	1.2e-05	4.08061	36	40
NDZ04	ETH02A	30	30	2	212.892	9.07146		0.00171	0.000176675	0.282587	5.24321e-05	0.28258	-2.50382	2.07317	1245.18		1	1.00005		10.2894	0.0138147		0.282574	3.5e-05	1.46724	9.7e-05	1.88674	0.000143	0.082834	0.001323	0.00171	1.6e-05	5.25185	35	39
NDZ04	ETH02A	34	34	2	606.8	24.511		0.001423	0.000209614	0.282563	5.66119e-05	0.282547	5.14217	2.62157	1134.93		1	1.00005		10.2894	0.0138147		0.28255	4.1e-05	1.4674	0.000129	1.88669	0.000248	0.051573	0.002638	0.001423	0.00015	5.72267	29	33
NDZ04	ETH02A	36	36	2	825.529	33.0947		0.000466	4.80423e-05	0.28248	4.92233e-05	0.282473	7.4571	2.51019	1183.04		1	1.00005		10.2894	0.0138147		0.282467	3e-05	1.46723	7.9e-05	1.88683	0.000155	0.016704	0.000284	0.000466	3e-06	5.7218	36	40
NDZ04	ETH02A	37	37	2	767.969	32.3222		0.000925	9.60606e-05	0.28261	7.15862e-05	0.282597	10.5439	3.29808	963.126		1	1.00005		10.2894	0.0138147		0.282597	6e-05	1.46731	0.000149	1.88678	0.00036	0.043305	0.001871	0.000925	1.3e-05	6.50047	18	20
NDZ04	ETH02A	38	38	2	635.742	24.8447		6.4e-05	1.11519e-05	0.282546	4.63532e-05	0.282545	5.73993	2.20534	1124.93		1	1.00005		10.2894	0.0138147		0.282533	2.5e-05	1.46726	6e-05	1.88692	0.000135	0.003545	0.000533	6.4e-05	9e-06	8.14579	36	39
NDZ04	ETH02A	39	39	2	632.659	27.4749		0.00037	3.81232e-05	0.282432	5.11022e-05	0.282428	1.5044	2.43863	1359.14		1	1.00005		10.2894	0.0138147		0.282419	3.3e-05	1.4672	9.3e-05	1.88678	0.000165	0.015973	0.000183	0.00037	2e-06	5.80488	36	40
NDZ04	ETH02A	40	40	2	1088.23	41.8706		0.00071	8.52818e-05	0.282253	4.38229e-05	0.282238	5.11057	2.55081	1527.35		1	1.00005		10.2894	0.0138147		0.28224	2e-05	1.46729	7.1e-05	1.88685	0.000136	0.030791	0.002362	0.00071	4.4e-05	7.06224	35	39
NDZ04	ETH02A	41	41	2	26.758	1.7768		0.000996	0.000103434	0.283114	4.69655e-05	0.283114	12.2136	1.70126	263.586		1	1.00005		10.2894	0.0138147		0.283101	2.6e-05	1.46721	8.2e-05	1.88666	0.000144	0.044765	0.001112	0.000996	1.4e-05	5.00526	36	39
NDZ04	ETH02A	42	42	2	604.986	23.813		0.002871	0.00031419	0.28265	5.11252e-05	0.282617	7.60054	2.43267	995.601		1	1.00005		10.2894	0.0138147		0.282637	3.3e-05	1.46727	8.1e-05	1.88686	0.000142	0.135944	0.00683	0.002871	0.000107	5.76686	37	39
NDZ04	ETH02A	43	43	2	666.325	30.0361		0.00088	9.63727e-05	0.282606	4.92371e-05	0.282595	8.19055	2.44841	1012.38		1	1.00005		10.2894	0.0138147		0.282593	3e-05	1.46733	8.1e-05	1.88677	0.000135	0.038014	0.000375	0.00088	3.3e-05	5.66146	36	39
NDZ04	ETH02A	44	44	2	701.009	30.1793		0.00063	6.48309e-05	0.282606	5.04808e-05	0.282598	9.06935	2.48823	991.302		1	1.00005		10.2894	0.0138147		0.282593	3.2e-05	1.46726	8.7e-05	1.88676	0.000148	0.026265	0.000109	0.00063	1e-06	5.10848	35	39
NDZ04	ETH02A	45	45	2	583.624	25.7083		0.000393	4.21803e-05	0.282158	5.37449e-05	0.282154	-9.29839	2.49137	1919.11		1	1.00005		10.2894	0.0138147		0.282145	3.7e-05	1.46727	8.5e-05	1.88678	0.000117	0.019368	0.000502	0.000393	1.2e-05	5.4096	38	39
NDZ04	ETH02A	47	47	2	915.928	38.0146		0.000746	8.04234e-05	0.282507	5.11101e-05	0.282494	10.2614	2.7057	1099.79		1	1.00005		10.2894	0.0138147		0.282494	3.3e-05	1.46723	7e-05	1.88666	0.000149	0.033443	0.00254	0.000746	2.4e-05	4.93402	36	39
NDZ04	ETH02A	49	49	2	518.131	20.8524		0.000504	5.52296e-05	0.28237	4.688e-05	0.282365	-3.28413	2.14091	1533.59		1	1.00005		10.2894	0.0138147		0.282357	2.6e-05	1.4673	7.5e-05	1.88691	0.000186	0.023467	0.00104	0.000504	1.9e-05	6.32628	36	40
NDZ04	ETH02A	50	50	2	1079.34	53.4395		0.000733	8.83423e-05	0.282379	4.92123e-05	0.282364	9.36283	3.00167	1283.43		1	1.00005		10.2894	0.0138147		0.282366	3e-05	1.46725	6.1e-05	1.88674	0.000151	0.027666	0.001236	0.000733	4.6e-05	6.49866	36	39
NDZ04	ETH02A	51	51	2	835.709	33.5953		0.001119	0.000120635	0.282546	5.04744e-05	0.282528	9.65826	2.59379	1068.1		1	1.00005		10.2894	0.0138147		0.282533	3.2e-05	1.46726	8.1e-05	1.88674	0.000157	0.043661	0.002067	0.001119	3.6e-05	5.29399	36	39
NDZ04	ETH02A	52	52	2	720.132	30.6782		0.000579	5.98769e-05	0.282598	4.43302e-05	0.28259	9.23403	2.28121	997.643		1	1.00005		10.2894	0.0138147		0.282585	2.1e-05	1.46729	7.2e-05	1.88683	0.000121	0.023474	0.000556	0.000579	6e-06	4.9457	35	39
NDZ04	ETH02A	53	53	2	701.366	27.325		0.001408	0.000199393	0.28264	5.11242e-05	0.282621	9.91772	2.49883	943.943		1	1.00005		10.2894	0.0138147		0.282627	3.3e-05	1.46725	8.2e-05	1.88685	0.000154	0.062311	0.006761	0.001408	0.000137	5.62761	37	40
NDZ04	ETH02A	54	54	2	608.584	28.5278		0.000761	8.35e-05	0.282214	4.63146e-05	0.282205	-6.90998	2.30279	1807.07		1	1.00005		10.2894	0.0138147		0.282201	2.5e-05	1.46726	7.8e-05	1.88684	0.000145	0.035014	0.001597	0.000761	2.9e-05	6.06484	36	40
NDZ04	ETH02A	56	56	2	674.092	36.4078		0.000351	3.99168e-05	0.282599	5.24333e-05	0.282595	8.35087	2.68894	1009.71		1	1.00005		10.2894	0.0138147		0.282586	3.5e-05	1.46721	8.8e-05	1.8868	0.000201	0.016042	0.000489	0.000351	1.7e-05	5.67178	31	35
NDZ04	ETH02A	57	57	2	829.942	37.5335		0.000995	0.00012574	0.282548	5.31009e-05	0.282532	9.67167	2.77893	1062.64		1	1.00005		10.2894	0.0138147		0.282535	3.6e-05	1.46721	5.9e-05	1.88674	0.00014	0.041655	0.002784	0.000995	7.3e-05	5.54542	35	39
NDZ04	ETH02A	58	58	2	945.454	36.9746		0.001675	0.000172489	0.282059	4.57643e-05	0.282029	-5.54784	2.53133	2001.52		1	1.00005		10.2894	0.0138147		0.282046	2.4e-05	1.46721	6.2e-05	1.88678	0.000132	0.071838	0.001029	0.001675	7e-06	8.99817	37	39
NDZ04	ETH02A	59	59	2	316.031	13.8931		0.001293	0.000137569	0.282654	4.4337e-05	0.282646	2.14148	1.89805	1067.93		1	1.00005		10.2894	0.0138147		0.282641	2.1e-05	1.46722	7.9e-05	1.88672	0.000131	0.046594	0.001184	0.001293	3.5e-05	6.71659	35	39
NDZ04	ETH02A	60	60	2	695.544	32.5566		0.000448	6.30387e-05	0.282617	4.53142e-05	0.282611	9.42233	2.36082	967.027		1	1.00005		10.2894	0.0138147		0.282604	2.3e-05	1.46721	8.4e-05	1.88678	0.000144	0.017629	0.002145	0.000448	4.3e-05	5.39593	35	39
NDZ04	ETH02A	61	61	2	825.698	32.4976		0.002014	0.000207924	0.282561	5.66117e-05	0.28253	9.4773	2.81655	1070.08		1	1.00005		10.2894	0.0138147		0.282548	4.1e-05	1.46728	7.8e-05	1.88681	0.000186	0.081914	0.00088	0.002014	1.7e-05	5.47062	36	38
NDZ04	ETH02A	62	62	2	673.569	31.6083		0.000989	0.000105283	0.282655	4.98581e-05	0.282642	10.0362	2.50768	914.611		1	1.00005		10.2894	0.0138147		0.282642	3.1e-05	1.46724	8.5e-05	1.8869	0.000162	0.040468	0.001975	0.000989	2.7e-05	5.04164	35	39
NDZ04	ETH02A	63	63	2	730.323	30.4092		0.000725	7.52653e-05	0.282627	4.53154e-05	0.282617	10.4163	2.31562	939.557		1	1.00005		10.2894	0.0138147		0.282614	2.3e-05	1.46728	4.9e-05	1.8868	0.000142	0.028245	0.000809	0.000725	1e-05	7.5513	35	38
NDZ04	ETH02A	65	65	2	798.404	31.0205		0.001635	0.000329228	0.282644	4.98569e-05	0.282619	12.0393	2.61651	903.971		1	1.00005		10.2894	0.0138147		0.282631	3.1e-05	1.46721	6.9e-05	1.88675	0.000169	0.068861	0.014042	0.001635	0.000283	5.1756	34	38
NDZ04	ETH02A	66	66	2	625.814	30.7574		0.001147	0.000134256	0.282514	4.3855e-05	0.282501	3.93201	2.28113	1218.05		1	1.00005		10.2894	0.0138147		0.282501	2e-05	1.4672	5.7e-05	1.88669	0.00013	0.038256	0.002264	0.001147	6.4e-05	8.15785	35	39
NDZ04	ETH02A	68	68	2	723.038	28.8369		0.000484	4.9961e-05	0.282609	5.17721e-05	0.282602	9.73395	2.50092	971.944		1	1.00005		10.2894	0.0138147		0.282596	3.4e-05	1.46723	5.8e-05	1.88669	0.000124	0.019568	6.2e-05	0.000484	4e-06	5.16118	37	38
NDZ04	ETH02A	69	69	2	851.196	34.2495		0.000934	0.00010194	0.2825	4.53003e-05	0.282485	8.47249	2.41952	1147.13		1	1.00005		10.2894	0.0138147		0.282487	2.3e-05	1.46726	7.1e-05	1.88678	0.000143	0.038202	0.002026	0.000934	3.4e-05	5.5164	34	38
NDZ04	ETH02A	70	70	2	613.526	24.9429		0.000561	0.000105243	0.282414	4.9832e-05	0.282408	0.362926	2.36165	1407.33		1	1.00005		10.2894	0.0138147		0.282401	3.1e-05	1.46724	6.8e-05	1.88676	0.000139	0.027592	0.004915	0.000561	8.8e-05	6.07797	36	39
NDZ04	ETH02A	71	71	2	761.227	30.2449		0.002803	0.000298513	0.282617	5.44836e-05	0.282577	9.68993	2.71451	1005.56		1	1.00005		10.2894	0.0138147		0.282604	3.8e-05	1.46724	6.6e-05	1.88688	0.00013	0.119415	0.002739	0.002803	7.7e-05	4.86625	37	39
NDZ04	ETH02A	72	72	2	774.454	35.5279		0.0012	0.000125082	0.28259	4.98511e-05	0.282573	9.83583	2.60845	1008.17		1	1.00005		10.2894	0.0138147		0.282577	3.1e-05	1.46728	7.5e-05	1.88662	0.00013	0.046979	0.001323	0.0012	2e-05	4.81607	37	38
NDZ04	ETH02A	73	73	2	703.038	28.4648		0.001021	0.000105629	0.282642	4.80487e-05	0.282629	10.2061	2.37664	929.1		1	1.00005		10.2894	0.0138147		0.282629	2.8e-05	1.46729	7.5e-05	1.88676	0.000128	0.042012	0.000582	0.001021	1.1e-05	5.34609	35	39
NDZ04	ETH02A	74	74	2	708.42	29.4074		0.000807	8.40468e-05	0.282592	4.5827e-05	0.282581	8.65397	2.31263	1020.65		1	1.00005		10.2894	0.0138147		0.282579	2.4e-05	1.46725	7.6e-05	1.88682	0.000153	0.033638	0.000663	0.000807	1.3e-05	5.69648	35	39
NDZ04	ETH02A	75	75	2	32.7244	2.64326		0.001337	0.000208744	0.282876	4.69381e-05	0.282875	3.91783	1.72132	739.155		1	1.00005		10.2894	0.0138147		0.282863	2.6e-05	1.46728	6.5e-05	1.88685	0.000121	0.058163	0.008107	0.001337	0.000157	5.5367	35	38
NDZ04	ETH02A	76	76	2	935.601	43.098		0.000547	5.68487e-05	0.282142	4.7416e-05	0.282132	-2.11295	2.67857	1804.13		1	1.00005		10.2894	0.0138147		0.282129	2.7e-05	1.46723	5.8e-05	1.88689	0.000124	0.022667	0.000721	0.000547	8e-06	6.97076	35	39
NDZ04	ETH02A	77	77	2	28.6713	2.40966		0.000741	8.19341e-05	0.282859	4.63897e-05	0.282859	3.24134	1.69466	774.085		1	1.00005		10.2894	0.0138147		0.282846	2.5e-05	1.46725	8e-05	1.88673	0.000146	0.031544	0.001667	0.000741	3e-05	5.19095	35	39
NDZ04	ETH02A	78	78	2	1074.26	42.524		0.000468	4.86605e-05	0.281729	4.47081e-05	0.281719	-13.6019	2.57341	2545.43		1	1.00005		10.2894	0.0138147		0.281716	2.2e-05	1.46729	7e-05	1.88674	0.000101	0.019679	0.000232	0.000468	7e-06	7.42754	35	39
NDZ04	ETH02A	79	79	2	863.245	42.6058		0.000906	9.51384e-05	0.282496	4.68944e-05	0.282481	8.61213	2.6585	1149.14		1	1.00005		10.2894	0.0138147		0.282483	2.6e-05	1.46723	7.9e-05	1.88686	0.000136	0.034568	0.000303	0.000906	1.9e-05	5.66743	36	40
NDZ04	ETH02A	80	80	2	542.252	23.4693		0.000369	5.66176e-05	0.282309	4.86013e-05	0.282305	-4.86163	2.26367	1640.54		1	1.00005		10.2894	0.0138147		0.282296	2.9e-05	1.4673	7.4e-05	1.88703	0.000129	0.016836	0.002556	0.000369	4.2e-05	6.15777	36	40
NDZ04	ETH02A	81	81	2	596.561	26.3792		0.001097	0.000113867	0.282476	4.86198e-05	0.282464	1.97013	2.34337	1304		1	1.00005		10.2894	0.0138147		0.282463	2.9e-05	1.46725	7.2e-05	1.88687	0.000152	0.047323	0.000382	0.001097	1.5e-05	5.64968	35	39
NDZ04	ETH02A	82	82	2	790.994	33.2732		0.001027	0.000134371	0.282222	4.52672e-05	0.282207	-2.74934	2.40642	1723.04		1	1.00005		10.2894	0.0138147		0.282209	2.3e-05	1.46726	8.3e-05	1.88679	8.5e-05	0.043099	0.004945	0.001027	8.3e-05	7.03855	35	39
NDZ04	ETH02A	84	84	2	864.463	33.2167		0.001684	0.000205778	0.282515	4.80344e-05	0.282488	8.86297	2.54028	1136.09		1	1.00005		10.2894	0.0138147		0.282502	2.8e-05	1.46732	5.2e-05	1.88679	0.000123	0.072588	0.005363	0.001684	0.000111	7.53017	35	39
NDZ04	ETH02A	86	86	2	790.41	35.0419		0.001544	0.000160982	0.282483	4.68929e-05	0.28246	6.21157	2.50606	1224.11		1	1.00005		10.2894	0.0138147		0.28247	2.6e-05	1.4672	5.3e-05	1.88671	0.000147	0.052706	0.001261	0.001544	2.6e-05	6.7303	34	38
NDZ04	ETH02A	87	87	2	603.272	24.6213		0.002495	0.000266357	0.282483	5.80694e-05	0.282455	1.80248	2.68089	1318.78		1	1.00005		10.2894	0.0138147		0.28247	4.3e-05	1.46723	7.6e-05	1.88695	0.000161	0.112125	0.005202	0.002495	7.1e-05	4.9251	36	40
NDZ04	ETH02A	88	88	2	31.8639	1.64883		0.002978	0.000308526	0.28285	5.38142e-05	0.282848	2.94533	1.94341	793.37		1	1.00005		10.2894	0.0138147		0.282837	3.7e-05	1.46725	9.4e-05	1.88677	0.000166	0.135719	0.002634	0.002978	3.6e-05	5.51891	36	40
NDZ04	ETH02A	89	89	2	667.699	26.1199		0.001063	0.0001104	0.282679	4.43401e-05	0.282666	10.7247	2.19219	871.089		1	1.00005		10.2894	0.0138147		0.282666	2.1e-05	1.46726	5.2e-05	1.88676	0.000111	0.040786	0.000291	0.001063	1.5e-05	8.08609	35	39
NDZ04	ETH02A	90	90	2	794.415	30.9517		0.003311	0.000344935	0.282629	5.04832e-05	0.282579	10.5334	2.60991	985.306		1	1.00005		10.2894	0.0138147		0.282616	3.2e-05	1.46723	6.3e-05	1.88661	0.000153	0.150507	0.002373	0.003311	5.4e-05	5.52495	36	39
NDZ04	ETH02A	92	92	2	705.476	30.3975		0.001121	0.000125715	0.282609	4.69074e-05	0.282594	9.04359	2.38664	996.388		1	1.00005		10.2894	0.0138147		0.282596	2.6e-05	1.46725	6.5e-05	1.88669	0.000115	0.052481	0.001755	0.001121	5e-05	7.36364	38	39
NDZ04	ETH02A	93	93	2	634.128	31.3377		0.001011	0.00019421	0.282606	4.29912e-05	0.282594	7.42845	2.29381	1028.96		1	1.00005		10.2894	0.0138147		0.282593	1.8e-05	1.4673	4.8e-05	1.88677	8.6e-05	0.040454	0.006535	0.001011	0.000164	10.8412	35	39
NDZ04	ETH02A	94	94	2	685.077	26.782		0.000428	4.62104e-05	0.282618	4.43326e-05	0.282613	9.23384	2.18887	969.081		1	1.00005		10.2894	0.0138147		0.282605	2.1e-05	1.46723	6.4e-05	1.88679	0.000149	0.017768	0.000947	0.000428	1.4e-05	7.96938	35	39
NDZ04	ETH02A	97	97	2	242.501	9.9624		0.000922	9.49998e-05	0.282518	4.6897e-05	0.282514	-4.19131	1.89154	1363.2		1	1.00005		10.2894	0.0138147		0.282505	2.6e-05	1.46735	7.8e-05	1.88686	0.000105	0.036156	0.0003	0.000922	5e-06	6.87702	33	37
NDZ04	ETH02A	98	98	2	811.617	33.282		0.001032	0.000108649	0.282656	4.58345e-05	0.28264	13.0756	2.41553	856.504		1	1.00005		10.2894	0.0138147		0.282643	2.4e-05	1.46734	3.7e-05	1.88689	0.000114	0.039796	0.0009	0.001032	2.3e-05	8.14852	34	38
NDZ04	ETH02A	100	100	2	863.069	35.7154		0.001617	0.000248811	0.282632	5.11233e-05	0.282606	13.0172	2.73145	901.935		1	1.00005		10.2894	0.0138147		0.282619	3.3e-05	1.46722	6e-05	1.88678	0.000166	0.059529	0.007468	0.001617	0.000185	5.70989	37	39
Sample RSH07A - Wadi Hammamat, Egypt (modern river sand)
NDZ08	RSH07A	1	1	5	825.025	45.9356		0.000453226	7.35348e-05	0.282595	4.58366e-05	0.282588	11.5272	2.69302	954.521		0.948171	1.00004		16.1585	0.013107		0.282584	2.7e-05	1.46725	6.4e-05	1.8867	0.000105	0.01913	0.000213	0.000478	7e-06	7.01698	29	30
NDZ08	RSH07A	2	2	5	30.8106	3.33645		0.00123547	0.000199744	0.283086	4.53074e-05	0.283085	11.3058	1.67836	318.608		0.948171	1.00004		16.1585	0.013107		0.283075	2.6e-05	1.46729	4.4e-05	1.88675	0.000128	0.0582	0.001114	0.001303	7e-06	6.39914	27	30
NDZ08	RSH07A	3	3	5	986.544	52.8057		0.0025411	0.000422059	0.281675	4.51561e-05	0.281628	-18.8445	2.99979	2761.09		0.948171	1.00004		16.1585	0.013107		0.281664	2.6e-05	1.46731	3.8e-05	1.88705	9.8e-05	0.109338	0.002943	0.00268	0.000103	9.49762	28	30
NDZ08	RSH07A	4	4	5	2134.89	28.7908		0.000706387	0.000114911	0.281235	4.5109e-05	0.281206	-7.47205	2.4263	3060.63		0.948171	1.00004		16.1585	0.013107		0.281224	2.6e-05	1.46727	7.8e-05	1.88687	0.000129	0.023107	0.000307	0.000745	1.4e-05	4.41098	27	30
NDZ08	RSH07A	5	5	5	893.658	48.6046		0.000903607	0.000147236	0.282088	4.63798e-05	0.282073	-5.1736	2.80712	1939.38		0.948171	1.00004		16.1585	0.013107		0.282077	2.8e-05	1.46728	5.1e-05	1.88682	0.000138	0.039759	0.001369	0.000953	2e-05	8.47546	30	30
NDZ08	RSH07A	6	6	5	981.679	53.8373		0.00204236	0.000330674	0.282489	4.89386e-05	0.282451	10.231	3.11261	1155.2		0.948171	1.00004		16.1585	0.013107		0.282478	3.2e-05	1.46731	8.3e-05	1.8868	0.000126	0.09337	0.001548	0.002154	2.2e-05	5.42594	29	30
NDZ08	RSH07A	7	7	5	976.207	54.7011		0.00112643	0.00018785	0.281561	4.34852e-05	0.28154	-22.1774	2.86785	2933.57		0.948171	1.00004		16.1585	0.013107		0.28155	2.3e-05	1.46724	5.1e-05	1.88676	0.000138	0.047733	0.002317	0.001188	4.9e-05	7.92512	30	30
NDZ08	RSH07A	8	8	5	766.299	39.2508		0.0015531	0.000345209	0.282631	4.11863e-05	0.282609	10.9299	2.49132	940.08		0.948171	1.00004		16.1585	0.013107		0.28262	1.8e-05	1.46727	7.3e-05	1.88664	0.000124	0.057441	0.00776	0.001638	0.00025	7.11093	28	30
NDZ08	RSH07A	9	9	5	744.966	41.2242		0.00109229	0.000176928	0.282136	4.40855e-05	0.282121	-6.83536	2.55446	1911.98		0.948171	1.00004		16.1585	0.013107		0.282125	2.4e-05	1.46728	5.2e-05	1.88672	0.000124	0.050287	0.000722	0.001152	1.3e-05	7.26636	29	30
NDZ08	RSH07A	10	10	5	776.422	40.3496		0.00153888	0.000273063	0.282665	4.58441e-05	0.282643	12.36	2.64405	867.951		0.948171	1.00004		16.1585	0.013107		0.282654	2.7e-05	1.46724	5.4e-05	1.88683	0.000123	0.069979	0.006498	0.001623	0.000119	6.986	27	30
NDZ08	RSH07A	11	11	5	645.992	34.0059		0.00121555	0.000196528	0.282608	4.25805e-05	0.282593	7.67044	2.33616	1025.03		0.948171	1.00004		16.1585	0.013107		0.282597	2.1e-05	1.46725	4e-05	1.88676	0.000113	0.055282	0.000819	0.001282	7e-06	9.42248	27	30
NDZ08	RSH07A	12	12	5	767.783	40.8192		0.00139666	0.00023445	0.28261	4.46893e-05	0.28259	10.2981	2.59446	976.777		0.948171	1.00004		16.1585	0.013107		0.282599	2.5e-05	1.46718	6.9e-05	1.88676	0.000157	0.066383	0.002296	0.001473	6.7e-05	7.2026	29	30
NDZ08	RSH07A	13	13	5	1018.13	54.1205		0.00151992	0.000250685	0.281529	4.88435e-05	0.2815	-22.6625	3.08218	2992.74		0.948171	1.00004		16.1585	0.013107		0.281518	3.2e-05	1.46735	6.8e-05	1.88691	0.000173	0.063808	0.001612	0.001603	5.3e-05	5.569	28	30
NDZ08	RSH07A	14	14	5	641.732	45.7411		0.000413402	7.29807e-05	0.282626	4.6436e-05	0.282621	8.55832	2.69689	971.714		0.948171	1.00004		16.1585	0.013107		0.282615	2.8e-05	1.46727	9.7e-05	1.88687	0.000133	0.017444	0.00157	0.000436	3.1e-05	5.8541	27	30
NDZ08	RSH07A	16	16	5	745.166	40.3506		0.00219407	0.000356355	0.282161	4.35519e-05	0.28213	-6.49304	2.58061	1893.25		0.948171	1.00004		16.1585	0.013107		0.28215	2.3e-05	1.4672	5.6e-05	1.88673	0.000137	0.086957	0.001773	0.002314	3.8e-05	9.80713	27	30
NDZ08	RSH07A	17	17	5	759.136	41.6203		0.00252119	0.000500696	0.282149	5.44769e-05	0.282113	-6.78925	3.06637	1920.77		0.948171	1.00004		16.1585	0.013107		0.282138	4e-05	1.46724	5.9e-05	1.88668	0.000171	0.095667	0.008108	0.002659	0.000307	6.53781	27	30
NDZ08	RSH07A	18	18	5	641.975	38.1242		0.00125727	0.00040458	0.282561	5.16499e-05	0.282546	5.90086	2.83994	1120.97		0.948171	1.00004		16.1585	0.013107		0.28255	3.6e-05	1.46727	8.3e-05	1.88687	0.000174	0.057385	0.015816	0.001326	0.000369	5.02634	29	30
NDZ08	RSH07A	20	20	5	1185.64	66.0741		0.00350444	0.000585748	0.282041	5.02261e-05	0.281962	-2.45688	3.6218	2024.36		0.948171	1.00004		16.1585	0.013107		0.28203	3.4e-05	1.46727	9.2e-05	1.88672	0.000167	0.176195	0.011098	0.003696	0.000158	6.12916	28	30
NDZ08	RSH07A	21	21	5	2639.14	24.7026		0.000670357	0.000115085	0.281196	5.0828e-05	0.281162	2.73493	2.58638	2918.54		0.948171	1.00004		16.1585	0.013107		0.281185	3.5e-05	1.46729	4.5e-05	1.88667	0.000194	0.027702	0.001311	0.000707	4.1e-05	4.69699	27	30
NDZ08	RSH07A	22	22	5	602.792	31.455		0.00198831	0.000322087	0.282615	5.60024e-05	0.282592	6.67013	2.78589	1046.03		0.948171	1.00004		16.1585	0.013107		0.282604	4.2e-05	1.46731	8.8e-05	1.88702	0.000225	0.093228	0.002174	0.002097	2.4e-05	3.7987	30	30
NDZ08	RSH07A	23	23	5	727.344	39.1542		0.000967134	0.000158358	0.282498	5.09519e-05	0.282485	5.66354	2.74465	1203.54		0.948171	1.00004		16.1585	0.013107		0.282487	3.5e-05	1.46724	8.1e-05	1.88667	0.000197	0.036976	0.002444	0.00102	2.7e-05	4.21521	28	30
NDZ08	RSH07A	24	24	5	745.252	39.8984		0.00114444	0.000192397	0.28263	4.83048e-05	0.282614	10.6439	2.68313	938.956		0.948171	1.00004		16.1585	0.013107		0.282619	3.1e-05	1.46719	8.4e-05	1.88663	0.000154	0.045762	0.002698	0.001207	5.6e-05	5.47742	28	30
NDZ08	RSH07A	25	25	5	631.738	35.4506		0.000779396	0.000143707	0.282343	4.20657e-05	0.282334	-1.84031	2.33349	1544.59		0.948171	1.00004		16.1585	0.013107		0.282332	2e-05	1.4672	7e-05	1.88684	0.000162	0.033768	0.003245	0.000822	7.3e-05	6.20439	27	30
NDZ08	RSH07A	26	26	5	851.65	44.2451		0.00306733	0.000503925	0.282548	8.1859e-05	0.282499	8.96972	4.11301	1119.67		0.948171	1.00004		16.1585	0.013107		0.282537	7.3e-05	1.4674	0.000142	1.88701	0.000216	0.094943	0.002629	0.003235	9.6e-05	2.21001	29	30
NDZ08	RSH07A	27	27	5	843.042	43.599		0.000364098	5.90235e-05	0.282379	4.64102e-05	0.282373	4.32668	2.65563	1372.01		0.948171	1.00004		16.1585	0.013107		0.282368	2.8e-05	1.46734	7e-05	1.88677	0.000136	0.014325	0.000137	0.000384	5e-06	5.64848	28	30
NDZ08	RSH07A	28	28	5	748.744	42.6817		0.00177972	0.000295351	0.28265	4.96141e-05	0.282625	11.1113	2.82742	915.54		0.948171	1.00004		16.1585	0.013107		0.282639	3.3e-05	1.46725	6.9e-05	1.88686	0.00018	0.082772	0.00169	0.001877	7.1e-05	4.79942	30	30
NDZ08	RSH07A	29	29	5	2672	23.3155		0.000369787	6.02316e-05	0.281214	4.39842e-05	0.281195	4.68005	2.21809	2840.39		0.948171	1.00004		16.1585	0.013107		0.281203	2.4e-05	1.4672	6.5e-05	1.88675	0.000142	0.01474	0.000544	0.00039	8e-06	7.07405	28	30
NDZ08	RSH07A	30	30	5	2495.98	24.1523		0.000942482	0.000158678	0.281088	4.34326e-05	0.281043	-4.85902	2.36658	3210.87		0.948171	1.00004		16.1585	0.013107		0.281077	2.3e-05	1.46726	5.4e-05	1.88681	0.000149	0.042633	0.00233	0.000994	4.7e-05	6.60239	27	30
NDZ08	RSH07A	33	33	5	668.864	36.4947		0.000864732	0.000139886	0.282603	4.70434e-05	0.282592	8.14676	2.53415	1016.91		0.948171	1.00004		16.1585	0.013107		0.282592	2.9e-05	1.46724	5.2e-05	1.88685	0.000115	0.037982	0.000868	0.000912	7e-06	7.70456	29	30
NDZ08	RSH07A	34	34	5	653.36	35.2279		0.00120607	0.000211256	0.282254	4.46506e-05	0.282239	-4.70249	2.44333	1720.74		0.948171	1.00004		16.1585	0.013107		0.282243	2.5e-05	1.46725	6.1e-05	1.88681	0.000179	0.061632	0.004391	0.001272	8.6e-05	7.41031	27	30
NDZ08	RSH07A	35	35	5	609.537	33.6422		0.000739573	0.00012202	0.282289	3.99248e-05	0.282281	-4.22442	2.20656	1659.12		0.948171	1.00004		16.1585	0.013107		0.282278	1.5e-05	1.46721	7e-05	1.88668	0.00015	0.034765	0.001244	0.00078	2.6e-05	7.10389	27	30
NDZ08	RSH07A	37	37	5	1096.28	55.8635		0.000873265	0.000147977	0.282359	4.411e-05	0.282341	8.92773	2.91715	1321.52		0.948171	1.00004		16.1585	0.013107		0.282348	2.4e-05	1.46726	5.3e-05	1.8868	0.000122	0.032967	0.001668	0.000921	4.7e-05	7.03228	30	30
NDZ08	RSH07A	38	38	5	143.728	8.66011		0.00175317	0.000286481	0.282749	4.5853e-05	0.282744	1.75926	1.83393	950.423		0.948171	1.00004		16.1585	0.013107		0.282738	2.7e-05	1.46725	8.2e-05	1.88671	0.000139	0.084679	0.00102	0.001849	4.5e-05	4.52936	27	30
NDZ08	RSH07A	39	39	5	844.161	45.8815		0.0010629	0.000177922	0.282565	4.96058e-05	0.282548	10.5479	2.86993	1025.12		0.948171	1.00004		16.1585	0.013107		0.282554	3.3e-05	1.4672	6.2e-05	1.88678	0.000119	0.043056	0.00252	0.001121	4.9e-05	7.4815	28	30
NDZ08	RSH07A	40	40	5	597.31	33.6626		0.00043047	7.4452e-05	0.282199	4.52123e-05	0.282194	-7.55744	2.37975	1833.87		0.948171	1.00004		16.1585	0.013107		0.282188	2.6e-05	1.46723	5.2e-05	1.88666	9.5e-05	0.019894	0.001276	0.000454	2.8e-05	6.63986	27	30
NDZ08	RSH07A	42	42	5	777.244	41.3089		0.00146208	0.000320874	0.282533	4.52481e-05	0.282512	7.74134	2.67183	1127.84		0.948171	1.00004		16.1585	0.013107		0.282522	2.6e-05	1.46717	5.6e-05	1.88664	0.000131	0.059672	0.014657	0.001542	0.000229	7.35816	27	30
NDZ08	RSH07A	43	43	5	722.41	38.3192		0.000771811	0.000126293	0.281542	4.45734e-05	0.281531	-28.2132	2.48548	3061.14		0.948171	1.00004		16.1585	0.013107		0.281531	2.5e-05	1.46729	5.2e-05	1.88672	0.000165	0.031443	0.00062	0.000814	2.1e-05	7.7647	28	30
NDZ08	RSH07A	44	44	5	680.887	34.3491		0.000603985	0.000100897	0.281618	4.40286e-05	0.28161	-26.3573	2.36608	2928.37		0.948171	1.00004		16.1585	0.013107		0.281607	2.4e-05	1.4672	5.6e-05	1.88681	0.000102	0.023301	0.000847	0.000637	2.7e-05	8.20834	28	30
NDZ08	RSH07A	45	45	5	598.645	31.3274		0.000587866	0.000110239	0.282034	4.88935e-05	0.282027	-13.4334	2.46951	2158.74		0.948171	1.00004		16.1585	0.013107		0.282023	3.2e-05	1.4673	5e-05	1.88673	0.000159	0.026307	0.002635	0.00062	5.9e-05	6.91466	30	30
NDZ08	RSH07A	46	46	5	903.279	53.6429		0.000988942	0.00016381	0.281984	4.76034e-05	0.281967	-8.69856	2.97039	2141.04		0.948171	1.00004		16.1585	0.013107		0.281973	3e-05	1.46724	6.8e-05	1.88663	0.000123	0.040346	0.001236	0.001043	3.8e-05	4.66537	27	30
NDZ08	RSH07A	47	47	5	697.559	38.1518		0.00141183	0.00025409	0.282677	4.46966e-05	0.282658	11.144	2.53322	871.883		0.948171	1.00004		16.1585	0.013107		0.282666	2.5e-05	1.46724	3.7e-05	1.88681	0.000145	0.05546	0.003717	0.001489	0.000118	8.07063	30	30
NDZ08	RSH07A	48	48	5	595.935	32.6337		0.000448485	7.25244e-05	0.282635	4.30856e-05	0.28263	7.84411	2.28137	974.56		0.948171	1.00004		16.1585	0.013107		0.282624	2.2e-05	1.46727	7.2e-05	1.88685	0.000149	0.020106	0.000377	0.000473	3e-06	6.27991	27	30
NDZ08	RSH07A	49	49	5	740.188	39.696		0.00199685	0.000331897	0.28265	4.25853e-05	0.282622	10.8211	2.52519	924.867		0.948171	1.00004		16.1585	0.013107		0.282639	2.1e-05	1.46726	8.4e-05	1.88677	0.000119	0.089058	0.005275	0.002106	8.2e-05	8.13726	27	30
NDZ08	RSH07A	50	50	5	588.142	32.7159		0.000622	0.000102459	0.282433	4.46701e-05	0.282426	0.450144	2.34682	1382		0.948171	1.00004		16.1585	0.013107		0.282422	2.5e-05	1.46724	4.9e-05	1.88685	0.000129	0.02237	0.000888	0.000656	2.1e-05	8.78225	29	30
NDZ08	RSH07A	53	53	5	642.855	36.1011		0.000262643	4.26084e-05	0.281789	4.57513e-05	0.281786	-20.9943	2.4449	2607.29		0.948171	1.00004		16.1585	0.013107		0.281778	2.7e-05	1.46725	4.9e-05	1.88677	9.5e-05	0.011281	0.000421	0.000277	4e-06	8.71744	30	30
NDZ08	RSH07A	54	54	5	972.059	51.9228		0.00113591	0.000185194	0.282409	4.41155e-05	0.282388	7.77982	2.82973	1284.29		0.948171	1.00004		16.1585	0.013107		0.282398	2.4e-05	1.46716	5.5e-05	1.88677	0.000188	0.047564	0.001653	0.001198	2.6e-05	6.95466	29	30
NDZ08	RSH07A	55	55	5	2051.62	27.0586		0.0014507	0.000266631	0.281611	5.15607e-05	0.281554	2.96173	2.80836	2428.28		0.948171	1.00004		16.1585	0.013107		0.2816	3.6e-05	1.46731	7.4e-05	1.88673	0.000142	0.066008	0.005884	0.00153	0.000134	6.82106	30	30
NDZ08	RSH07A	58	58	5	721.769	42.1039		0.00115772	0.000187684	0.282642	5.02841e-05	0.282626	10.5502	2.79535	925.047		0.948171	1.00004		16.1585	0.013107		0.282631	3.4e-05	1.46726	7.2e-05	1.88672	0.000175	0.037211	0.00099	0.001221	1.6e-05	5.9242	30	30
NDZ08	RSH07A	59	59	5	555.136	30.0728		0.00073578	0.000151481	0.282623	5.09638e-05	0.282615	6.40714	2.52545	1022.09		0.948171	1.00004		16.1585	0.013107		0.282612	3.5e-05	1.46719	6.7e-05	1.88678	0.000153	0.03247	0.003786	0.000776	9.9e-05	7.02535	30	30
NDZ08	RSH07A	60	60	5	919.987	50.5869		0.00302087	0.000572255	0.282072	4.95576e-05	0.28202	-6.46261	3.17046	2031.48		0.948171	1.00004		16.1585	0.013107		0.282061	3.3e-05	1.46722	5.5e-05	1.8866	0.000102	0.150547	0.017882	0.003186	0.000315	9.17376	30	30
NDZ08	RSH07A	61	61	5	646.1	34.3053		0.000584073	0.000109231	0.282097	4.20374e-05	0.28209	-10.1525	2.29705	2015.96		0.948171	1.00004		16.1585	0.013107		0.282086	2e-05	1.46727	8.6e-05	1.88695	9.7e-05	0.028663	0.003452	0.000616	5.8e-05	6.96369	27	30
NDZ08	RSH07A	62	62	5	1024.51	53.949		0.00164413	0.000268923	0.282461	5.02666e-05	0.282429	10.4253	3.14285	1179.32		0.948171	1.00004		16.1585	0.013107		0.28245	3.4e-05	1.46719	6.1e-05	1.8868	0.000148	0.066121	0.00092	0.001734	4.4e-05	7.03043	30	30
NDZ08	RSH07A	63	63	5	638.229	36.4956		0.00118995	0.000195984	0.282544	4.89441e-05	0.28253	5.24619	2.615	1154.59		0.948171	1.00004		16.1585	0.013107		0.282533	3.2e-05	1.46718	6.5e-05	1.88678	0.000156	0.056681	0.001382	0.001255	4e-05	5.74435	30	30
NDZ08	RSH07A	64	64	5	674.77	35.4513		0.00224906	0.000568448	0.282619	4.76681e-05	0.28259	8.22063	2.70392	1017.57		0.948171	1.00004		16.1585	0.013107		0.282608	3e-05	1.46718	5.2e-05	1.88655	0.000129	0.116493	0.02311	0.002372	0.000461	6.9656	27	30
NDZ08	RSH07A	65	65	5	621.39	34.424		0.00132839	0.000226121	0.282629	4.25829e-05	0.282613	7.83313	2.35202	995.884		0.948171	1.00004		16.1585	0.013107		0.282618	2.1e-05	1.46731	5.8e-05	1.88673	0.000153	0.057347	0.003684	0.001401	7.5e-05	7.33288	27	30
NDZ08	RSH07A	66	66	5	819.206	42.295		0.000788878	0.000127503	0.282545	4.52494e-05	0.282533	9.44226	2.61152	1066.74		0.948171	1.00004		16.1585	0.013107		0.282534	2.6e-05	1.46722	5.8e-05	1.88678	0.000124	0.034482	0.000368	0.000832	3e-06	6.81202	28	30
NDZ08	RSH07A	67	67	5	1096.04	58.8274		0.00153604	0.000260958	0.282337	4.52271e-05	0.282305	7.65611	3.08369	1392.17		0.948171	1.00004		16.1585	0.013107		0.282326	2.6e-05	1.46735	9.6e-05	1.88671	0.000173	0.051538	0.000974	0.00162	8.5e-05	5.64794	27	30
NDZ08	RSH07A	68	68	5	625.727	34.0695		0.000640963	0.000104003	0.282235	4.82651e-05	0.282227	-5.73943	2.50722	1756.02		0.948171	1.00004		16.1585	0.013107		0.282224	3.1e-05	1.46727	6.1e-05	1.88674	0.00014	0.030199	0.00044	0.000676	1e-05	8.32172	29	30
NDZ08	RSH07A	70	70	5	624.899	35.3635		0.000486412	7.91669e-05	0.282571	4.41333e-05	0.282565	6.20554	2.38319	1090.04		0.948171	1.00004		16.1585	0.013107		0.28256	2.4e-05	1.4672	7.8e-05	1.88685	0.000147	0.02144	0.000261	0.000513	1e-05	5.0827	29	30
NDZ08	RSH07A	71	71	5	2655.93	24.1038		0.000364098	5.90235e-05	0.281065	4.45216e-05	0.281046	-0.984618	2.25223	3132.31		0.948171	1.00004		16.1585	0.013107		0.281054	2.5e-05	1.46721	7.2e-05	1.88685	0.000138	0.014953	0.000516	0.000384	5e-06	7.33191	29	30
NDZ08	RSH07A	72	72	5	612.031	32.3527		0.000478826	7.90325e-05	0.282204	4.4093e-05	0.282198	-7.07333	2.31291	1818.86		0.948171	1.00004		16.1585	0.013107		0.282193	2.4e-05	1.46724	5.7e-05	1.88672	0.000106	0.020841	0.001299	0.000505	1.7e-05	7.75831	30	30
NDZ08	RSH07A	73	73	5	640.876	33.7359		0.00197883	0.00032798	0.282579	5.23535e-05	0.282555	6.20641	2.71733	1102.96		0.948171	1.00004		16.1585	0.013107		0.282568	3.7e-05	1.46725	6.3e-05	1.88665	0.000124	0.076149	0.001392	0.002087	7.7e-05	7.26835	30	30
NDZ08	RSH07A	74	74	5	936.824	49.1936		0.000662771	0.000109895	0.281787	5.59307e-05	0.281775	-14.7388	3.1464	2498.35		0.948171	1.00004		16.1585	0.013107		0.281776	4.2e-05	1.46724	7e-05	1.88695	0.000102	0.026193	0.00097	0.000699	2.6e-05	8.17443	27	30
NDZ08	RSH07A	75	75	5	652.217	33.8249		0.000546146	8.9388e-05	0.281824	4.51721e-05	0.281817	-19.6692	2.38903	2542.43		0.948171	1.00004		16.1585	0.013107		0.281813	2.6e-05	1.46722	6.5e-05	1.88681	0.000124	0.020677	0.000385	0.000576	1.5e-05	8.97355	29	30
NDZ08	RSH07A	76	76	5	617.752	35.1651		0.000820168	0.000134467	0.282581	4.82999e-05	0.282571	6.26369	2.542	1080.97		0.948171	1.00004		16.1585	0.013107		0.28257	3.1e-05	1.46717	9.4e-05	1.88679	0.000153	0.03689	0.000698	0.000865	2.4e-05	5.61209	29	30
NDZ08	RSH07A	77	77	5	590.269	32.6796		0.00216941	0.000354403	0.282633	5.52579e-05	0.282609	6.9711	2.79229	1018.97		0.948171	1.00004		16.1585	0.013107		0.282622	4.1e-05	1.46724	5.4e-05	1.88686	0.000154	0.099625	0.002029	0.002288	5.5e-05	5.70842	27	30
NDZ08	RSH07A	78	78	5	2652.66	26.1564		0.000755692	0.000125378	0.280948	5.01207e-05	0.28091	-5.93177	2.61287	3394.66		0.948171	1.00004		16.1585	0.013107		0.280937	3.4e-05	1.4673	5.5e-05	1.88678	0.000124	0.033613	0.001547	0.000797	3e-05	7.04169	30	30
NDZ08	RSH07A	79	79	5	812.532	53.7227		0.00199969	0.000327455	0.28253	4.30737e-05	0.282499	8.10664	2.85922	1136.11		0.948171	1.00004		16.1585	0.013107		0.282519	2.2e-05	1.46721	6.5e-05	1.88683	0.000114	0.080562	0.001907	0.002109	5.6e-05	7.0095	27	30
NDZ08	RSH07A	80	80	5	976.814	55.882		0.000963341	0.000156494	0.281619	5.36991e-05	0.281601	-20.002	3.24074	2816.21		0.948171	1.00004		16.1585	0.013107		0.281608	3.9e-05	1.46729	0.000172	1.88669	0.000337	0.041039	0.001111	0.001016	1.7e-05	5.96835	13	14
NDZ08	RSH07A	81	81	5	632.84	33.0246		0.000295829	5.21549e-05	0.282193	4.25332e-05	0.282189	-6.92432	2.26625	1827.25		0.948171	1.00004		16.1585	0.013107		0.282182	2.1e-05	1.46716	6.7e-05	1.88677	0.000121	0.012574	0.001433	0.000312	2.2e-05	6.68068	27	30
NDZ08	RSH07A	82	82	5	638.554	33.555		0.00101359	0.000165627	0.281998	4.82413e-05	0.281986	-14.008	2.51472	2221.93		0.948171	1.00004		16.1585	0.013107		0.281987	3.1e-05	1.46728	7.2e-05	1.88678	9.9e-05	0.046916	0.000624	0.001069	2.6e-05	5.90286	27	30
NDZ08	RSH07A	83	83	5	589.967	34.3663		0.000457966	7.6162e-05	0.282136	4.46378e-05	0.282131	-9.96207	2.37446	1960.77		0.948171	1.00004		16.1585	0.013107		0.282125	2.5e-05	1.46729	7.1e-05	1.8866	0.000117	0.015171	0.000301	0.000483	1.9e-05	7.15992	30	30
NDZ08	RSH07A	84	84	5	121.51	6.72487		0.00264445	0.000428984	0.282719	4.89615e-05	0.282713	0.15706	1.90635	1022.6		0.948171	1.00004		16.1585	0.013107		0.282708	3.2e-05	1.46724	7.8e-05	1.88682	0.00024	0.134688	0.003955	0.002789	4e-05	4.48262	27	30
NDZ08	RSH07A	85	85	5	610.034	35.944		0.000984201	0.000159315	0.282612	4.96104e-05	0.282601	7.12526	2.61157	1026.38		0.948171	1.00004		16.1585	0.013107		0.282601	3.3e-05	1.46717	6.7e-05	1.88673	0.000152	0.045594	0.001046	0.001038	1e-05	4.67967	30	30
NDZ08	RSH07A	86	86	5	610.825	34.7974		0.000458915	7.41781e-05	0.282069	5.16037e-05	0.282064	-11.8726	2.63118	2082.6		0.948171	1.00004		16.1585	0.013107		0.282058	3.6e-05	1.46725	9e-05	1.88682	0.000194	0.020864	0.000235	0.000484	2e-06	5.62254	27	30
NDZ08	RSH07A	87	87	5	644.328	35.0249		0.00177118	0.000293163	0.282583	5.096e-05	0.282562	6.5104	2.68559	1088.73		0.948171	1.00004		16.1585	0.013107		0.282572	3.5e-05	1.46723	6.5e-05	1.88682	0.000127	0.083493	0.003886	0.001868	6.7e-05	5.72513	27	30
NDZ08	RSH07A	88	88	5	610.559	33.3618		0.00123831	0.000202984	0.282593	4.64326e-05	0.282579	6.36059	2.45531	1069.7		0.948171	1.00004		16.1585	0.013107		0.282582	2.8e-05	1.46722	7.8e-05	1.88695	0.00014	0.058643	0.001772	0.001306	3.6e-05	6.6142	28	30
NDZ08	RSH07A	89	89	5	726.389	37.6949		0.0010866	0.000185462	0.282639	4.58413e-05	0.282624	10.5792	2.54252	927.193		0.948171	1.00004		16.1585	0.013107		0.282628	2.7e-05	1.46718	7.7e-05	1.88678	0.000119	0.050844	0.003673	0.001146	6.3e-05	6.07941	30	30
NDZ08	RSH07A	90	90	5	608.811	33.3206		0.000739573	0.000119958	0.282424	4.89322e-05	0.282416	0.54023	2.51784	1393.65		0.948171	1.00004		16.1585	0.013107		0.282413	3.2e-05	1.46728	8e-05	1.88686	0.000148	0.033926	0.000247	0.00078	1.1e-05	4.9126	27	30
NDZ08	RSH07A	91	91	5	606.843	31.1664		0.000459863	7.71795e-05	0.282464	4.70291e-05	0.282459	2.02644	2.39038	1309.17		0.948171	1.00004		16.1585	0.013107		0.282453	2.9e-05	1.46725	8.2e-05	1.88674	0.00017	0.020541	0.000737	0.000485	2.2e-05	5.07001	28	30
NDZ08	RSH07A	92	92	5	1019.8	47.9499		0.00141562	0.000232023	0.282305	4.52237e-05	0.282278	4.95011	2.8126	1480.71		0.948171	1.00004		16.1585	0.013107		0.282294	2.6e-05	1.46714	7.5e-05	1.88677	0.000151	0.070535	0.000623	0.001493	4.1e-05	6.12705	28	30
NDZ08	RSH07A	94	94	5	775.187	37.6008		0.00200917	0.000325981	0.282628	4.36039e-05	0.282599	10.7793	2.52124	955.797		0.948171	1.00004		16.1585	0.013107		0.282617	2.3e-05	1.46725	8.4e-05	1.88664	0.00016	0.092453	0.001907	0.002119	3.1e-05	5.844	27	30
NDZ08	RSH07A	96	96	5	801.531	41.3212		0.00112832	0.000186619	0.282481	4.41234e-05	0.282464	6.60287	2.57166	1211.28		0.948171	1.00004		16.1585	0.013107		0.28247	2.4e-05	1.46724	8.5e-05	1.88663	0.000152	0.045796	0.001365	0.00119	4.2e-05	6.11986	27	30
NDZ08	RSH07A	98	98	5	1019.13	48.022		0.00203477	0.000356377	0.281834	5.22845e-05	0.281795	-12.1814	3.13123	2424.12		0.948171	1.00004		16.1585	0.013107		0.281823	3.7e-05	1.46725	9.8e-05	1.88672	0.000207	0.079196	0.003318	0.002146	0.000145	6.11871	27	30
NDZ08	RSH07A	102	102	5	1031.17	50.6473		0.000522442	8.63198e-05	0.282358	4.07267e-05	0.282348	7.69252	2.63981	1337.3		0.948171	1.00004		16.1585	0.013107		0.282347	1.7e-05	1.46723	7.9e-05	1.88692	0.000134	0.023203	0.000301	0.000551	1.9e-05	7.61033	27	30
NDZ08	RSH07A	104	104	5	876.772	40.0468		0.000786982	0.000131915	0.28249	4.35886e-05	0.282477	8.76725	2.51168	1151.48		0.948171	1.00004		16.1585	0.013107		0.282479	2.3e-05	1.46731	6.4e-05	1.88674	0.000151	0.036462	0.001677	0.00083	3.7e-05	6.72132	27	30
NDZ08	RSH07A	105	105	5	656.54	30.0203		0.00022282	3.62037e-05	0.281818	4.40506e-05	0.281815	-19.6447	2.24738	2544.49		0.948171	1.00004		16.1585	0.013107		0.281807	2.4e-05	1.46724	7.7e-05	1.88684	0.000148	0.007976	0.000139	0.000235	4e-06	8.15183	29	30
NDZ08	RSH07A	106	106	5	621.118	31.4998		0.000314793	5.10863e-05	0.282057	4.57797e-05	0.282053	-12.0097	2.34528	2098.32		0.948171	1.00004		16.1585	0.013107		0.282046	2.7e-05	1.46726	9.5e-05	1.88681	0.00018	0.015312	0.000545	0.000332	5e-06	7.27347	27	30
NDZ08	RSH07A	107	107	5	986.77	47.9808		0.00107902	0.000180196	0.282423	4.8284e-05	0.282403	8.63619	2.89114	1248.48		0.948171	1.00004		16.1585	0.013107		0.282412	3.1e-05	1.46733	9.1e-05	1.88689	0.000164	0.046738	0.003248	0.001138	4.8e-05	5.40976	27	30
NDZ08	RSH07A	110	110	5	1043.13	49.583		0.000977564	0.000160021	0.282384	4.46648e-05	0.282365	8.56392	2.79531	1298.46		0.948171	1.00004		16.1585	0.013107		0.282373	2.5e-05	1.46729	7.5e-05	1.88684	0.000156	0.041306	0.001054	0.001031	2.7e-05	6.65294	29	30
NDZ08	RSH07A	111	111	5	675.217	34.2508		0.00129425	0.000209828	0.282714	4.76777e-05	0.282698	12.0244	2.53129	804.054		0.948171	1.00004		16.1585	0.013107		0.282703	3e-05	1.4672	0.000102	1.88666	0.000171	0.055573	0.001774	0.001365	1.8e-05	5.96664	27	30
NDZ08	RSH07A	113	113	5	545.968	28.7124		0.000999372	0.000174234	0.28246	4.70287e-05	0.28245	0.338343	2.35818	1354.24		0.948171	1.00004		16.1585	0.013107		0.282449	2.9e-05	1.46729	8.2e-05	1.88672	0.000168	0.050945	0.004278	0.001054	6.9e-05	4.49059	29	30
NDZ08	RSH07A	115	115	5	812.536	39.3224		0.00234009	0.000381448	0.282498	4.95992e-05	0.282462	6.78839	2.80211	1209.86		0.948171	1.00004		16.1585	0.013107		0.282487	3.3e-05	1.46722	6.9e-05	1.88669	0.000187	0.115859	0.006572	0.002468	5.3e-05	4.6039	29	30
NDZ08	RSH07A	118	118	5	586.012	32.288		0.00060114	9.75096e-05	0.28245	5.75038e-05	0.282443	1.01324	2.79006	1348.89		0.948171	1.00004		16.1585	0.013107		0.282439	4.4e-05	1.46717	0.000101	1.88686	0.000163	0.028835	0.001113	0.000634	9e-06	4.04643	30	30
NDZ08	RSH07A	119	119	5	765.052	37.7718		0.00117289	0.000216325	0.28248	4.89378e-05	0.282463	5.74793	2.67349	1229.43		0.948171	1.00004		16.1585	0.013107		0.282469	3.2e-05	1.46722	7.5e-05	1.88673	0.000138	0.049711	0.003815	0.001237	0.00011	5.32328	27	30
NDZ08	RSH07A	121	121	5	800.822	37.0399		0.00104204	0.000198064	0.282479	4.3068e-05	0.282463	6.56264	2.44852	1212.95		0.948171	1.00004		16.1585	0.013107		0.282468	2.2e-05	1.4672	0.0001	1.88693	0.000124	0.04904	0.006893	0.001099	0.00011	6.14377	27	30
NDZ08	RSH07A	122	122	5	644.85	29.7225		0.000973771	0.000157906	0.282489	5.37776e-05	0.282477	3.53513	2.62602	1255.64		0.948171	1.00004		16.1585	0.013107		0.282478	3.9e-05	1.46723	0.000117	1.88686	0.000182	0.047021	0.000806	0.001027	1.4e-05	4.69188	27	30
NDZ08	RSH07A	123	123	5	647.843	30.8599		0.000635274	0.00012122	0.281856	4.40547e-05	0.281848	-18.6711	2.29594	2484.51		0.948171	1.00004		16.1585	0.013107		0.281845	2.4e-05	1.46728	7e-05	1.88663	9.1e-05	0.034421	0.00448	0.00067	6.8e-05	5.44276	27	30
NDZ08	RSH07A	124	124	5	790.127	39.1736		0.000951015	0.000156111	0.282473	5.23437e-05	0.282459	6.1638	2.8017	1226.55		0.948171	1.00004		16.1585	0.013107		0.282462	3.7e-05	1.46725	9.2e-05	1.88659	0.000174	0.040293	0.000275	0.001003	2.9e-05	4.91624	29	30
NDZ08	RSH07A	125	125	5	626.151	29.7319		0.00145165	0.000256708	0.28229	4.76346e-05	0.282273	-4.12044	2.4395	1666.67		0.948171	1.00004		16.1585	0.013107		0.282279	3e-05	1.46728	7.7e-05	1.88675	0.000155	0.086839	0.005829	0.001531	0.00011	6.49971	28	30
NDZ08	RSH07A	126	126	5	691.681	33.4767		0.000820168	0.000132802	0.282653	4.4694e-05	0.282642	10.4397	2.3846	906.702		0.948171	1.00004		16.1585	0.013107		0.282642	2.5e-05	1.46719	0.000114	1.88673	0.000192	0.036676	0.001682	0.000865	9e-06	6.02885	27	30
NDZ08	RSH07A	127	127	5	997.366	49.3637		0.000892229	0.000147329	0.282255	5.30354e-05	0.282238	3.03923	3.0743	1568.66		0.948171	1.00004		16.1585	0.013107		0.282244	3.8e-05	1.46721	9.2e-05	1.88663	0.000182	0.041605	0.003166	0.000941	3.2e-05	5.09271	27	30
NDZ08	RSH07A	128	128	5	704.999	33.9075		0.000945326	0.000175904	0.282545	5.16484e-05	0.282532	6.84877	2.66003	1119.06		0.948171	1.00004		16.1585	0.013107		0.282534	3.6e-05	1.46726	0.000125	1.88683	0.000229	0.042561	0.005247	0.000997	9.2e-05	3.65462	28	30
NDZ08	RSH07A	129	129	5	612.721	30.6125		0.000179204	3.04696e-05	0.281803	4.7585e-05	0.281801	-21.1361	2.38228	2591.34		0.948171	1.00004		16.1585	0.013107		0.281792	3e-05	1.46725	0.000102	1.88672	0.000216	0.009266	0.000257	0.000189	1e-05	5.73658	27	30
NDZ08	RSH07A	130	130	5	1052.08	55.9014		0.00067889	0.000110287	0.282306	4.46563e-05	0.282293	6.20686	2.91064	1437.04		0.948171	1.00004		16.1585	0.013107		0.282295	2.5e-05	1.46714	7e-05	1.88675	0.000169	0.032742	0.000359	0.000716	1.2e-05	5.41794	27	30
NDZ08	RSH07A	131	131	5	609.184	29.1548		0.00202245	0.000387698	0.282084	4.30235e-05	0.282061	-12.0121	2.3045	2088.97		0.948171	1.00004		16.1585	0.013107		0.282073	2.2e-05	1.46717	8.3e-05	1.88685	0.000156	0.104266	0.015516	0.002133	0.00022	9.54448	27	30
NDZ08	RSH07A	132	132	5	688.523	32.0981		0.000604933	0.000103228	0.282535	4.52483e-05	0.282527	6.28955	2.36352	1136.99		0.948171	1.00004		16.1585	0.013107		0.282524	2.6e-05	1.4673	6.5e-05	1.88682	0.000174	0.024767	0.001344	0.000638	3.5e-05	8.35338	29	30
NDZ08	RSH07A	133	133	5	687.379	35.2282		0.000990838	0.000166191	0.282554	6.30297e-05	0.282541	6.76034	3.0841	1109.7		0.948171	1.00004		16.1585	0.013107		0.282543	5.1e-05	1.46725	0.000101	1.88677	0.000133	0.046675	0.001612	0.001045	4.7e-05	4.0129	30	30
NDZ08	RSH07A	134	134	5	877.181	45.6533		0.000528131	9.30056e-05	0.281684	4.82098e-05	0.281675	-19.6315	2.78117	2717.58		0.948171	1.00004		16.1585	0.013107		0.281673	3.1e-05	1.46714	5.7e-05	1.88675	0.000175	0.021525	0.002729	0.000557	3.9e-05	6.00757	28	30
NDZ08	RSH07A	135	135	5	628.016	30.4396		0.00194659	0.000329074	0.28254	4.58308e-05	0.282517	4.56607	2.4136	1184.37		0.948171	1.00004		16.1585	0.013107		0.282529	2.7e-05	1.46718	9e-05	1.88683	0.000175	0.095161	0.001831	0.002053	0.000102	6.36247	30	30
NDZ08	RSH07A	138	138	5	603.773	29.0419		0.00113875	0.000196594	0.282588	5.30659e-05	0.282575	6.07637	2.59403	1080.13		0.948171	1.00004		16.1585	0.013107		0.282577	3.8e-05	1.46727	9.4e-05	1.88671	0.000173	0.053136	0.004399	0.001201	7.3e-05	4.75926	28	30
NDZ08	RSH07A	140	140	5	23.9363	2.18564		0.00206132	0.000339815	0.282799	5.02992e-05	0.282798	0.995335	1.8303	896.92		0.948171	1.00004		16.1585	0.013107		0.282788	3.4e-05	1.46715	7.9e-05	1.88666	0.000205	0.10168	0.004756	0.002174	7.1e-05	5.2427	28	30
Sample RSH09A - Wadi Kharit, Egypt (sandstone bedrock)
NDZ08	RSH09A	1	1	15.1	648.772	29.1752		0.000383766	6.52596e-05	0.282568	3.27697e-05	0.282563	6.67362	1.84033	1083.19		0.996795	1.00003		16.9872	0.00991439		0.28256	1.7e-05	1.4673	5.4e-05	1.88674	0.0001	0.012434	0.000126	0.000385	3e-06	11.9614	27	30
NDZ08	RSH09A	2	2	15.1	850.33	37.7438		0.000803417	0.000138734	0.282569	3.32995e-05	0.282556	10.9721	2.09681	1006.36		0.996795	1.00003		16.9872	0.00991439		0.282561	1.8e-05	1.46727	6e-05	1.88672	0.000109	0.033658	0.001025	0.000806	2.5e-05	10.1457	27	30
NDZ08	RSH09A	3	3	15.1	737.348	29.6936		0.00101274	0.000179966	0.282565	3.38502e-05	0.282551	8.23361	1.9418	1067.79		0.996795	1.00003		16.9872	0.00991439		0.282557	1.9e-05	1.46729	6.8e-05	1.88675	9.7e-05	0.048603	0.002621	0.001016	5.3e-05	10.8254	27	30
NDZ08	RSH09A	4	4	15.1	771.085	29.9115		0.00288173	0.000559112	0.282637	4.56212e-05	0.282595	10.5619	2.53352	964.661		0.996795	1.00003		16.9872	0.00991439		0.282629	3.6e-05	1.46731	9.7e-05	1.88679	0.000159	0.116582	0.005753	0.002891	0.000271	9.62544	27	30
NDZ08	RSH09A	5	5	15.1	929.303	38.8151		0.000311997	5.33358e-05	0.281771	3.61862e-05	0.281766	-15.2546	2.18722	2520.52		0.996795	1.00003		16.9872	0.00991439		0.281763	2.3e-05	1.4673	6.1e-05	1.88669	0.000117	0.013546	0.000186	0.000313	6e-06	11.6571	27	30
NDZ08	RSH09A	6	6	15.1	133.677	6.57829		0.00115728	0.000199661	0.282838	3.56421e-05	0.282835	4.74777	1.42094	773.911		0.996795	1.00003		16.9872	0.00991439		0.28283	2.2e-05	1.46737	6.7e-05	1.88662	0.000164	0.054233	0.00216	0.001161	3.5e-05	6.79783	28	30
NDZ08	RSH09A	7	7	15.1	541.811	22.0358		0.00320769	0.000567756	0.282767	4.10608e-05	0.282734	10.3211	2.11548	791.088		0.996795	1.00003		16.9872	0.00991439		0.282759	3e-05	1.46727	9.2e-05	1.88675	0.000186	0.147018	0.006065	0.003218	0.00016	9.23346	27	30
NDZ08	RSH09A	8	8	15.1	802.065	33.4954		0.000685795	0.00011677	0.282462	3.27607e-05	0.282452	6.1782	1.96797	1235.45		0.996795	1.00003		16.9872	0.00991439		0.282454	1.7e-05	1.46731	9.2e-05	1.88674	0.000158	0.030754	0.000235	0.000688	8e-06	9.13029	27	30
NDZ08	RSH09A	9	9	15.1	3029.81	17.6212		0.00056917	0.000101812	0.280892	3.87891e-05	0.280859	1.15517	2.00422	3321.39		0.996795	1.00003		16.9872	0.00991439		0.280884	2.7e-05	1.46728	8.8e-05	1.88674	9.9e-05	0.0227	0.001271	0.000571	3.2e-05	9.57226	30	30
NDZ08	RSH09A	10	10	15.1	923.392	38.6288		0.00106258	0.000186995	0.282443	3.62377e-05	0.282425	7.9633	2.25298	1234.41		0.996795	1.00003		16.9872	0.00991439		0.282435	2.3e-05	1.46727	5.9e-05	1.88675	0.000153	0.043951	0.002253	0.001066	4.9e-05	8.90529	27	30
NDZ08	RSH09A	12	12	15.1	732.127	28.3945		0.00200754	0.000359459	0.282628	3.62519e-05	0.2826	9.86508	2.06972	971.994		0.996795	1.00003		16.9872	0.00991439		0.28262	2.3e-05	1.46731	5.3e-05	1.88661	9.4e-05	0.102734	0.006297	0.002014	0.000114	11.618	28	30
NDZ08	RSH09A	13	13	15.1	811.362	32.8171		0.00162577	0.000293611	0.282558	3.56203e-05	0.282533	9.27613	2.13426	1069.66		0.996795	1.00003		16.9872	0.00991439		0.28255	2.2e-05	1.46727	5.6e-05	1.88672	0.000105	0.072217	0.005404	0.001631	0.0001	12.8658	27	30
NDZ08	RSH09A	14	14	15.1	741.187	29.4044		0.00122207	0.000231156	0.282554	3.82204e-05	0.282537	7.82458	2.11291	1093.83		0.996795	1.00003		16.9872	0.00991439		0.282546	2.6e-05	1.46723	7.3e-05	1.88658	0.000167	0.061227	0.007105	0.001226	0.000102	12.0933	30	30
NDZ08	RSH09A	15	15	15.1	944.234	36.7651		0.00383965	0.000683509	0.282587	3.89099e-05	0.282519	11.771	2.56675	1038.35		0.996795	1.00003		16.9872	0.00991439		0.282579	2.7e-05	1.46724	7.2e-05	1.88678	0.000106	0.172726	0.009371	0.003852	0.000205	9.12631	27	30
NDZ08	RSH09A	16	16	15.1	2587.78	15.1851		0.000305019	7.54344e-05	0.28135	4.47566e-05	0.281335	7.6762	2.07932	2609.42		0.996795	1.00003		16.9872	0.00991439		0.281342	3.5e-05	1.46725	7.8e-05	1.88674	0.000116	0.012598	0.002305	0.000306	5.5e-05	13.1328	30	30
NDZ08	RSH09A	17	17	15.1	771.328	32.6598		0.00090509	0.000191185	0.282479	3.62405e-05	0.282466	5.98706	2.1048	1221.16		0.996795	1.00003		16.9872	0.00991439		0.282471	2.3e-05	1.46728	9.1e-05	1.88703	0.000135	0.035136	0.00374	0.000908	0.000114	8.59014	28	30
NDZ08	RSH09A	18	18	15.1	661.69	25.7407		0.000970878	0.00017118	0.282596	3.56233e-05	0.282584	7.69426	1.90388	1036.46		0.996795	1.00003		16.9872	0.00991439		0.282588	2.2e-05	1.46727	0.000119	1.88684	0.000131	0.040993	0.003047	0.000974	4.6e-05	10.1103	29	30
NDZ08	RSH09A	19	19	15.1	632.992	25.838		0.000326949	5.72658e-05	0.282597	3.44241e-05	0.282593	7.37305	1.82095	1031.14		0.996795	1.00003		16.9872	0.00991439		0.282589	2e-05	1.46728	6.8e-05	1.88675	0.00014	0.010789	0.000705	0.000328	1.4e-05	11.843	27	30
NDZ08	RSH09A	20	20	15.1	735.945	31.4377		0.00109647	0.000235761	0.282455	3.96012e-05	0.28244	4.26537	2.21028	1288.63		0.996795	1.00003		16.9872	0.00991439		0.282447	2.8e-05	1.46722	6.7e-05	1.88668	8.5e-05	0.053932	0.008207	0.0011	0.000145	9.37246	29	30
NDZ08	RSH09A	22	22	15.1	775.56	30.6223		0.000442577	7.5287e-05	0.282535	3.8219e-05	0.282529	8.30324	2.07772	1095		0.996795	1.00003		16.9872	0.00991439		0.282527	2.6e-05	1.46732	6.9e-05	1.88682	0.000143	0.019065	0.000301	0.000444	4e-06	10.6618	30	30
NDZ08	RSH09A	23	23	15.1	847.038	34.3193		0.0019896	0.00034056	0.282468	3.89014e-05	0.282436	6.64987	2.30994	1245.64		0.996795	1.00003		16.9872	0.00991439		0.28246	2.7e-05	1.46728	7.5e-05	1.8867	0.000109	0.08863	0.001364	0.001996	4.2e-05	10.3866	30	30
NDZ08	RSH09A	25	25	15.1	864.858	38.6926		0.00112139	0.000199661	0.282522	3.8218e-05	0.282504	9.44427	2.3222	1103.87		0.996795	1.00003		16.9872	0.00991439		0.282514	2.6e-05	1.46729	6.8e-05	1.88681	0.000132	0.046006	0.002832	0.001125	6e-05	11.3479	29	30
NDZ08	RSH09A	26	26	15.1	1903.98	28.3102		0.00175735	0.000360641	0.281612	5.04344e-05	0.281548	-0.669592	2.8832	2506.3		0.996795	1.00003		16.9872	0.00991439		0.281604	4.2e-05	1.46724	0.0001	1.88674	0.000138	0.080439	0.012789	0.001763	0.000203	11.3286	28	30
NDZ08	RSH09A	27	27	15.1	2612.59	21.0329		0.0013068	0.000284183	0.281	4.09414e-05	0.280935	-5.98204	2.44119	3365.05		0.996795	1.00003		16.9872	0.00991439		0.280992	3e-05	1.46721	5.7e-05	1.88664	0.000121	0.0637	0.011076	0.001311	0.000178	11.4599	27	30
NDZ08	RSH09A	28	28	15.1	742.85	30.7025		0.00203446	0.000385346	0.282626	4.96614e-05	0.282598	10.0087	2.60994	972.68		0.996795	1.00003		16.9872	0.00991439		0.282618	4.1e-05	1.46726	6.9e-05	1.88674	0.000117	0.091207	0.010393	0.002041	0.000171	10.3982	27	30
NDZ08	RSH09A	29	29	15.1	1017.23	41.9518		0.000691776	0.000117935	0.282303	3.6227e-05	0.28229	5.31595	2.30131	1458.28		0.996795	1.00003		16.9872	0.00991439		0.282295	2.3e-05	1.46722	8e-05	1.88672	0.000172	0.02358	0.000429	0.000694	1e-05	11.3434	30	30
NDZ08	RSH09A	30	30	15.1	975.308	40.5699		0.00119615	0.000203818	0.282514	3.38461e-05	0.282492	11.533	2.22691	1077.11		0.996795	1.00003		16.9872	0.00991439		0.282506	1.9e-05	1.46736	5.9e-05	1.88676	9.7e-05	0.046969	0.001267	0.0012	1.6e-05	11.2526	27	30
NDZ08	RSH09A	31	31	15.2	1040.14	42.629		0.000447	1.2e-05	0.28191	2.5e-05	0.281901	-7.9341	1.84978	2208.44		Iolite						0.281906	2.5e-05	1.46728	7.5e-05	1.8867	8.9e-05	0.02331	0.00068	0.000568	1.6e-05	10.16	29.697
NDZ08	RSH09A	32	32	15.2	638.95	28.3234		0.000611	1.4e-05	0.282568	3.1e-05	0.282561	6.35767	1.73091	1092.92		Iolite						0.282564	3.1e-05	1.46732	7.7e-05	1.8868	0.00017	0.03293	0.00093	0.00077	1.8e-05	6.97	29.696
NDZ08	RSH09A	33	33	15.2	850.442	38.1469		0.000296	3.9e-05	0.282492	2.1e-05	0.282487	8.53426	1.62358	1143.06		Iolite						0.282488	2.1e-05	1.46727	6.4e-05	1.88668	7.4e-05	0.0145	0.0012	0.000369	4.8e-05	9.36	29.696
NDZ08	RSH09A	34	34	15.2	787.519	33.5646		0.000754	9.1e-05	0.28181	2.6e-05	0.281799	-17.2772	1.71114	2518.66		Iolite						0.281806	2.6e-05	1.46724	6.6e-05	1.88676	0.00015	0.0399	0.0058	0.00093	0.00011	10.77	30.747
NDZ08	RSH09A	35	35	15.2	627.067	31.9021		0.000551	2.4e-05	0.282608	4.4e-05	0.282602	7.53637	2.27601	1017.16		Iolite						0.282604	4.4e-05	1.46736	9.9e-05	1.88667	0.00013	0.02725	0.00098	0.000675	2.9e-05	6.05	29.694
NDZ08	RSH09A	36	36	15.2	620.478	25.7644		0.000864	3.4e-05	0.2826	3e-05	0.28259	6.97772	1.64265	1043.15		Iolite						0.282596	3e-05	1.46739	5.5e-05	1.88676	0.00016	0.0389	0.0014	0.001045	4.1e-05	7.4	29.697
NDZ08	RSH09A	37	37	15.2	615.164	25.906		0.000695	7.5e-05	0.282527	2e-05	0.282519	4.34533	1.31173	1186.31		Iolite						0.282523	2e-05	1.4673	8.9e-05	1.88671	0.00013	0.039	0.0053	0.00083	9e-05	8.49	29.697
NDZ08	RSH09A	38	38	15.2	861.443	33.6748		0.001562	5.4e-05	0.28252	2.6e-05	0.282495	9.04478	1.68097	1123.45		Iolite						0.282516	2.6e-05	1.46724	7.2e-05	1.88678	0.00017	0.0855	0.0046	0.001842	6.4e-05	10.46	29.682
NDZ08	RSH09A	39	39	15.2	598.272	23.8292		0.000833	7.7e-05	0.282478	3.3e-05	0.282469	2.18286	1.7236	1293.51		Iolite						0.282474	3.3e-05	1.46727	8.5e-05	1.88667	0.00013	0.0387	0.002	0.000966	8.9e-05	8.42	29.695
NDZ08	RSH09A	40	40	15.2	657.845	27.3251		0.00144	0.00015	0.282418	2.3e-05	0.2824	1.1002	1.47252	1402		Iolite						0.282414	2.3e-05	1.4673	5.6e-05	1.88664	0.00014	0.0647	0.0054	0.00165	0.00017	10.1	30.744
NDZ08	RSH09A	41	41	15.2	648.232	27.2965		0.000778	8.5e-05	0.282069	3.5e-05	0.28206	-11.1806	1.87789	2074.26		Iolite						0.282065	3.5e-05	1.46733	7.9e-05	1.88662	0.00015	0.0372	0.0052	0.000874	9.5e-05	9.59	29.694
NDZ08	RSH09A	42	42	15.2	788.746	33.2427		0.00254	0.00063	0.282531	6.2e-05	0.282493	7.35128	3.23722	1159.03		Iolite						0.282527	6.2e-05	1.46728	7.3e-05	1.88653	0.00013	0.154	0.043	0.00281	0.00069	8.8	29.693
NDZ08	RSH09A	43	43	15.2	719.256	30.6094		0.001762	6.2e-05	0.282606	2.3e-05	0.282582	8.92986	1.50079	1014		Iolite						0.282602	2.3e-05	1.46728	5.8e-05	1.8866	9.5e-05	0.0782	0.0035	0.001913	6.7e-05	7.71	28.643
NDZ08	RSH09A	44	44	15.2	689.105	29.8891		0.00111	0.00025	0.282195	2.3e-05	0.282181	-5.97189	1.58583	1819.6		Iolite						0.282191	2.3e-05	1.46724	6.3e-05	1.88677	0.00016	0.059	0.013	0.00118	0.00027	11.3	29.693
NDZ08	RSH09A	45	45	15.2	1037.86	42.2609		0.000681	4.9e-05	0.281956	2.2e-05	0.281943	-6.51728	1.75533	2128.86		Iolite						0.281952	2.2e-05	1.46726	8.1e-05	1.88673	0.00011	0.0308	0.0036	0.000715	5.2e-05	11.87	29.693
NDZ08	RSH09A	46	46	15.2	687.902	27.1311		0.00111	0.00012	0.282309	2.1e-05	0.282295	-1.96056	1.39245	1596.43		Iolite						0.282305	2.1e-05	1.46728	5.4e-05	1.88667	9.3e-05	0.0513	0.0052	0.00114	0.00012	10.54	29.693
NDZ08	RSH09A	47	47	15.2	1069.7	42.6066		0.000813	7.6e-05	0.282399	2.3e-05	0.282383	9.79966	1.81812	1251.19		Iolite						0.282396	2.3e-05	1.46727	7.7e-05	1.8867	8.7e-05	0.033	0.0023	0.000825	7.7e-05	11.77	30.748
NDZ08	RSH09A	48	48	15.2	946.422	40.8837		0.000729	6.4e-05	0.282395	6.1e-05	0.282382	6.97884	3.11172	1308.11		Iolite						0.282391	6.1e-05	1.46758	0.0002	1.88642	0.00038	0.0288	0.0023	0.000728	6.4e-05	4.6	26.542
NDZ08	RSH09A	49	49	15.2	591.521	25.1659		0.000543	5.6e-05	0.282097	2.7e-05	0.282091	-11.342	1.53561	2038.05		Iolite						0.282093	2.7e-05	1.4673	6.6e-05	1.88673	0.00014	0.0232	0.0034	0.000535	5.5e-05	9.69	30.746
NDZ08	RSH09A	51	51	15.2	869.436	35.6361		0.001562	5e-05	0.28254	3.2e-05	0.282514	9.926	1.93412	1080.62		Iolite						0.282536	3.2e-05	1.46728	8.6e-05	1.88678	0.00011	0.0678	0.0028	0.001486	4.6e-05	11.26	30.744
NDZ08	RSH09A	52	52	15.2	688.016	27.7581		0.000789	6.7e-05	0.281867	3.1e-05	0.281857	-17.4652	1.74009	2450.34		Iolite						0.281863	3.1e-05	1.46721	7.7e-05	1.88657	0.00017	0.0296	0.0021	0.000747	6.3e-05	7.7	29.695
NDZ08	RSH09A	54	54	15.2	2937.46	18.1374		0.00109	0.00013	0.280942	2.3e-05	0.28088	-0.258122	1.49668	3321.86		Iolite						0.280938	2.3e-05	1.46737	9.6e-05	1.88671	0.00011	0.0428	0.0081	0.00101	0.00013	8.8	30.746
NDZ08	RSH09A	55	55	15.2	786.651	30.8301		0.000884	2.6e-05	0.282285	3.1e-05	0.282272	-0.537678	1.79071	1596.95		Iolite						0.282282	3.1e-05	1.4673	8.2e-05	1.88681	0.00017	0.0294	0.0011	0.000818	2.4e-05	9.5	29.694
NDZ08	RSH09A	56	56	15.2	2623.3	16.7471		0.000511	3.5e-05	0.280995	2.4e-05	0.280969	-4.49386	1.30393	3294.07		Iolite						0.280991	2.4e-05	1.46725	5.5e-05	1.8868	0.0001	0.0209	0.0019	0.000471	3.2e-05	10.13	29.699
NDZ08	RSH09A	59	59	15.2	984.542	40.6733		0.0009	0.0001	0.282385	2e-05	0.282368	7.358	1.67643	1317.98		Iolite						0.282382	2e-05	1.46731	4.1e-05	1.8867	0.00012	0.0311	0.0031	0.000836	9.6e-05	9.48	29.693
NDZ08	RSH09A	60	60	15.2	1004.58	40.1944		0.00236	0.00017	0.281625	3.4e-05	0.28158	-20.1166	2.17061	2844.31		Iolite						0.281621	3.4e-05	1.46723	8.4e-05	1.88672	0.00013	0.123	0.011	0.00222	0.00016	9.15	30.742
NDZ08	RSH09A	61	61	15.2	902.31	38.0824		0.002137	2.8e-05	0.282448	2.3e-05	0.282412	7.02964	1.64107	1269.39		Iolite						0.282445	2.3e-05	1.46734	5.1e-05	1.88669	0.00015	0.0809	0.0014	0.001932	2.6e-05	10.43	29.689
NDZ08	RSH09A	62	62	15.2	620.439	28.171		0.0011	8.5e-05	0.282588	2.6e-05	0.282575	6.45441	1.57146	1072.47		Iolite						0.282585	2.6e-05	1.46732	7.8e-05	1.88671	0.00012	0.0409	0.0036	0.000991	7.6e-05	10.19	29.695
NDZ08	RSH09A	63	63	15.2	1088.63	44.2872		0.001653	5.9e-05	0.282441	2.6e-05	0.282407	11.0963	1.92536	1194.24		Iolite						0.282438	2.6e-05	1.46729	5.2e-05	1.88674	8.8e-05	0.0572	0.0019	0.001484	5.3e-05	10.84	29.693
NDZ08	RSH09A	64	64	15.2	729.62	29.9771		0.001221	3.6e-05	0.281631	2.9e-05	0.281614	-25.12	1.69577	2899.47		Iolite						0.281628	2.9e-05	1.46727	5.6e-05	1.88663	0.00012	0.0481	0.0016	0.001094	3.2e-05	10.9	29.691
NDZ08	RSH09A	65	65	15.2	1072.51	46.834		0.001813	6.8e-05	0.282403	1.9e-05	0.282366	9.2858	1.73293	1282.16		Iolite						0.2824	1.9e-05	1.4673	6.7e-05	1.88668	0.00012	0.0578	0.0024	0.001622	6.1e-05	10.3	29.694
NDZ08	RSH09A	66	66	15.2	1978.58	25.5112		0.000654	9.4e-05	0.28149	0.00011	0.281465	-1.88923	4.61453	2632.9		Iolite						0.28149	0.00011	1.46763	0.00022	1.88618	0.00049	0.0219	0.0017	0.000585	8.4e-05	8.8	16.551
NDZ08	RSH09A	67	67	15.2	737.765	33.3079		0.000703	5.7e-05	0.282577	2.9e-05	0.282567	8.81979	1.79343	1035.26		Iolite						0.282574	2.9e-05	1.46731	7.9e-05	1.88679	0.00011	0.0231	0.0018	0.000628	5.1e-05	10.94	29.695
NDZ08	RSH09A	68	68	15.2	823.262	37.0363		0.000684	2.3e-05	0.282504	2.2e-05	0.282493	8.13646	1.6139	1143.18		Iolite						0.282501	2.2e-05	1.46732	7.9e-05	1.88678	0.00011	0.02273	0.00076	0.000612	2e-05	10.67	29.695
NDZ08	RSH09A	69	69	15.2	616.966	26.8434		0.000815	7.1e-05	0.282586	2.7e-05	0.282577	6.42502	1.57672	1071.29		Iolite						0.282583	2.7e-05	1.46728	7e-05	1.88672	0.00015	0.0318	0.0029	0.000731	6.4e-05	9	29.695
NDZ08	RSH09A	70	70	15.2	624.622	28.4892		0.000895	4e-05	0.282579	2.7e-05	0.282568	6.31212	1.59845	1083.84		Iolite						0.282577	2.7e-05	1.46735	6.7e-05	1.88659	0.0001	0.0356	0.0016	0.000805	3.6e-05	8.38	28.642
NDZ08	RSH09A	71	71	15.2	926.128	39.4174		0.00197	0.00043	0.282224	3.5e-05	0.28219	-0.299149	2.35899	1696.16		Iolite						0.282221	3.5e-05	1.46741	0.00013	1.88659	0.00016	0.067	0.012	0.00177	0.00039	8.8	27.593
NDZ08	RSH09A	72	72	15.2	2593.12	21.4696		0.000556	7.2e-05	0.280999	2.1e-05	0.280971	-5.12848	1.37064	3303.68		Iolite						0.280997	2.1e-05	1.46728	7.4e-05	1.88674	0.00015	0.021	0.003	0.000503	6.5e-05	10.09	29.692
NDZ08	RSH09A	73	73	15.2	607.498	25.6412		0.000379	1.6e-05	0.28194	2.5e-05	0.281936	-16.4819	1.46179	2332.96		Iolite						0.281937	2.5e-05	1.46734	5.6e-05	1.8867	9.1e-05	0.01601	0.00069	0.000345	1.4e-05	8.9	29.695
NDZ08	RSH09A	74	74	15.2	939.058	39.013		0.0018	6.1e-05	0.282354	2.4e-05	0.282322	4.69017	1.72795	1429.64		Iolite						0.282351	2.4e-05	1.46736	5.4e-05	1.88667	0.00013	0.0792	0.0037	0.001648	5.5e-05	9.52	29.692
NDZ08	RSH09A	77	77	15.2	590.053	27.614		0.000838	4.2e-05	0.282233	2.5e-05	0.282224	-6.67473	1.50803	1779.25		Iolite						0.282231	2.5e-05	1.46729	7.2e-05	1.88668	0.00014	0.0355	0.0018	0.000784	4e-05	9.2	28.643
NDZ08	RSH09A	78	78	15.2	900.102	39.1748		0.00132	0.00023	0.28222	3.1e-05	0.282198	-0.604763	2.09545	1692.1		Iolite						0.282218	3.1e-05	1.46733	0.0001	1.88677	0.0002	0.0573	0.0097	0.00124	0.00021	11.4	23.388
NDZ08	RSH09A	79	79	15.2	843.178	34.8003		0.000654	9.2e-05	0.282329	2e-05	0.282319	2.3947	1.53479	1479.67		Iolite						0.282327	2e-05	1.46723	5.7e-05	1.88673	0.00012	0.0225	0.0034	0.000623	8.7e-05	10.39	29.694
NDZ08	RSH09A	81	81	15.2	992.328	39.0446		0.001057	3.1e-05	0.282403	2.7e-05	0.282383	8.06374	1.83739	1284.96		Iolite						0.282401	2.7e-05	1.46736	5e-05	1.8867	0.00013	0.0392	0.0013	0.001029	3e-05	10.06	29.695
NDZ08	RSH09A	82	82	15.2	705.727	28.425		0.00085	0.00012	0.282538	2.3e-05	0.282527	6.66112	1.49883	1130.16		Iolite						0.282536	2.3e-05	1.46726	5.3e-05	1.88665	0.00011	0.0366	0.0053	0.00083	0.00011	8.69	29.695
NDZ08	RSH09A	83	83	15.2	122.646	6.20692		0.001676	6.7e-05	0.282821	2.4e-05	0.282817	3.86622	0.986094	814.729		Iolite						0.282819	2.4e-05	1.46733	6.8e-05	1.88677	0.00012	0.0829	0.0036	0.001671	6.6e-05	6.41	28.644
NDZ08	RSH09A	84	84	15.2	585.576	24.9586		0.000488	2.4e-05	0.282262	2.9e-05	0.282257	-5.60955	1.58976	1716.69		Iolite						0.28226	2.9e-05	1.46727	5.9e-05	1.88685	0.00012	0.022	0.0012	0.000492	2.4e-05	7.68	29.695
NDZ08	RSH09A	85	85	15.2	966.624	39.8089		0.001657	7.2e-05	0.281714	2.6e-05	0.281684	-17.3069	1.82691	2661.82		Iolite						0.281712	2.6e-05	1.46732	7e-05	1.88662	0.00015	0.0731	0.0034	0.001696	7.6e-05	9.2	29.694
NDZ08	RSH09A	86	86	15.2	673.022	30.0377		0.00081	0.00013	0.282626	2.9e-05	0.282616	9.07662	1.74947	968.088		Iolite						0.282624	2.9e-05	1.46723	7e-05	1.88672	0.00015	0.0456	0.0078	0.00084	0.00013	8.25	28.644
NDZ08	RSH09A	87	87	15.2	812.217	36.182		0.00184	0.0003	0.282575	2.6e-05	0.282547	9.78022	1.86521	1042.1		Iolite						0.282573	2.6e-05	1.46734	8.9e-05	1.88664	0.00015	0.0693	0.0073	0.00194	0.00032	10.5	29.694
NDZ08	RSH09A	88	88	15.2	630.318	27.9241		0.00158	0.00015	0.282638	2.7e-05	0.282619	8.23874	1.62183	980.371		Iolite						0.282636	2.7e-05	1.46727	5.8e-05	1.88673	0.00014	0.0715	0.0075	0.00169	0.00016	7.93	28.642
NDZ08	RSH09A	91	91	15.2	964.379	52.1386		0.00096	1.6e-05	0.281504	2.1e-05	0.281487	-24.3479	1.90134	3041.6		Iolite						0.281504	2.1e-05	1.46727	7.2e-05	1.8868	0.00011	0.0357	0.00054	0.000917	1.5e-05	9.54	29.693
NDZ08	RSH09A	92	92	15.2	1026.27	51.763		0.001056	3.8e-05	0.282439	2.3e-05	0.282419	10.0872	1.98279	1199.66		Iolite						0.282438	2.3e-05	1.46721	6.8e-05	1.88665	0.00014	0.0402	0.001	0.001	3.6e-05	9.54	29.697
NDZ08	RSH09A	93	93	15.2	830.421	42.4978		0.00154	0.00014	0.28255	2.5e-05	0.282526	9.45022	1.88558	1075.44		Iolite						0.282549	2.5e-05	1.4673	6.7e-05	1.8868	0.00015	0.0677	0.0066	0.00145	0.00013	8.65	29.69
NDZ08	RSH09A	94	94	15.2	859.548	47.3307		0.00303	0.00018	0.282184	2.4e-05	0.282135	-3.74367	1.93384	1833.1		Iolite						0.282184	2.4e-05	1.46721	6.7e-05	1.8865	0.00014	0.1263	0.0081	0.00283	0.00017	7.91	29.692
NDZ08	RSH09A	95	95	15.2	732.518	39.4708		0.00184	0.00022	0.282552	2e-05	0.282527	7.26279	1.66462	1118.25		Iolite						0.282552	2e-05	1.46724	8.6e-05	1.88664	0.00013	0.0734	0.0093	0.00171	0.0002	7.59	29.696
NDZ08	RSH09A	96	96	15.2	854.22	44.6605		0.001557	8.5e-05	0.282523	2.9e-05	0.282498	8.99796	2.04346	1120.18		Iolite						0.282523	2.9e-05	1.46728	5.6e-05	1.88659	0.00016	0.0601	0.0038	0.001445	7.9e-05	6.46	29.694
NDZ08	RSH09A	98	98	15.2	906.877	48.5287		0.00118	0.00035	0.28166	2.4e-05	0.28164	-20.2159	2.13283	2772.72		Iolite						0.28166	2.4e-05	1.46732	0.00011	1.88663	0.0001	0.045	0.013	0.00109	0.00032	11	29.694
NDZ08	RSH09A	99	99	15.2	774.494	39.4407		0.001173	9e-05	0.282248	2.8e-05	0.282231	-2.26504	1.90062	1682.95		Iolite						0.282247	2.8e-05	1.46732	6.2e-05	1.88674	0.00011	0.0481	0.0036	0.001087	8.3e-05	8.51	28.642
NDZ08	RSH09A	100	100	15.2	876.027	48.0851		0.0013	0.00012	0.282166	3.1e-05	0.282145	-3.0299	2.21897	1806.9		Iolite						0.282165	3.1e-05	1.46724	7.1e-05	1.88675	0.00014	0.055	0.0055	0.00121	0.00011	10.2	29.696
NDZ08	RSH09A	102	102	15.2	604.349	32.6723		0.00077	9.5e-05	0.28258	3.1e-05	0.282571	5.95345	1.85717	1087.49		Iolite						0.28258	3.1e-05	1.46723	7.7e-05	1.88697	0.00011	0.0307	0.004	0.00072	8.9e-05	8.46	29.697
NDZ08	RSH09A	103	103	15.2	700.715	34.6668		0.000906	7e-05	0.282537	2.2e-05	0.282525	6.48931	1.57497	1135.71		Iolite						0.282537	2.2e-05	1.46732	6.3e-05	1.88678	0.00012	0.0377	0.0033	0.000851	6.6e-05	10.81	29.69
NDZ08	RSH09A	104	104	15.2	624.972	32.7885		0.000633	3.6e-05	0.282559	2.7e-05	0.282552	5.72063	1.69689	1117.27		Iolite						0.282559	2.7e-05	1.46724	5.9e-05	1.88684	0.00014	0.0245	0.0014	0.000598	3.4e-05	8.75	28.644
NDZ08	RSH09A	105	105	15.2	1083.63	55.3331		0.00093	0.00013	0.282046	2.4e-05	0.282027	-2.48939	2.17343	1944.04		Iolite						0.282046	2.4e-05	1.4673	5.3e-05	1.88667	0.00012	0.0362	0.0053	0.00089	0.00012	10.92	29.69
NDZ08	RSH09A	106	106	15.2	1054.41	56.8033		0.00091	0.00011	0.281818	3.2e-05	0.2818	-11.2024	2.47105	2398.72		Iolite						0.281817	3.2e-05	1.46733	7.8e-05	1.88668	0.00014	0.0346	0.0039	0.00087	0.0001	10.5	26.542
NDZ08	RSH09A	107	107	15.2	604.79	31.3595		0.001239	1.7e-05	0.28217	2.2e-05	0.282156	-8.74402	1.46555	1905.38		Iolite						0.28217	2.2e-05	1.46728	5.6e-05	1.88667	0.00011	0.05782	0.00095	0.001196	1.7e-05	10.9	29.691
NDZ08	RSH09A	108	108	15.2	729.29	39.3311		0.000864	2.6e-05	0.282464	3.1e-05	0.282452	4.5516	1.97679	1267.25		Iolite						0.282464	3.1e-05	1.4673	5.9e-05	1.88671	0.00012	0.0368	0.0018	0.000841	2.5e-05	8.69	28.643
NDZ08	RSH09A	109	109	15.2	721.284	37.1349		0.00154	0.00019	0.282392	2.4e-05	0.282371	1.50019	1.74601	1430.93		Iolite						0.282392	2.4e-05	1.46727	5.6e-05	1.88685	9e-05	0.072	0.011	0.00151	0.00019	11.35	29.694
NDZ08	RSH09A	110	110	15.2	744.398	38.3256		0.000981	9.1e-05	0.282561	2.2e-05	0.282547	8.26171	1.66764	1071.95		Iolite						0.28256	2.2e-05	1.46733	6.7e-05	1.88672	9.7e-05	0.0421	0.0048	0.000972	9e-05	10.1	29.694
NDZ08	RSH09A	111	111	15.2	656.637	35.319		0.000864	2.1e-05	0.282421	2.4e-05	0.28241	1.43241	1.63529	1382.51		Iolite						0.282421	2.4e-05	1.46731	6.1e-05	1.88676	0.00011	0.03847	0.00088	0.000864	2.2e-05	10.2	28.642
NDZ08	RSH09A	114	114	15.2	768.471	38.763		0.000337	4e-06	0.282554	1.9e-05	0.282549	8.87196	1.54289	1057.35		Iolite						0.282555	1.9e-05	1.46727	5.6e-05	1.88678	0.00013	0.01233	0.00014	0.000346	4e-06	11.11	29.692
NDZ08	RSH09A	115	115	15.2	613.819	34.7528		0.000545	4.6e-05	0.282587	1.8e-05	0.282581	6.50167	1.42762	1064.44		Iolite						0.282587	1.8e-05	1.46727	5.4e-05	1.88662	0.00015	0.0234	0.0022	0.000565	4.7e-05	9.88	27.594
NDZ08	RSH09A	116	116	15.2	674.108	34.4556		0.000594	5.2e-05	0.282524	2.5e-05	0.282516	5.58515	1.6735	1164.72		Iolite						0.282525	2.5e-05	1.46723	5.6e-05	1.8867	0.00011	0.0254	0.0023	0.000623	5.4e-05	10.28	28.646
NDZ08	RSH09A	117	117	15.2	993.703	50.8462		0.00081	0.00013	0.282394	2.4e-05	0.282379	7.93919	2.06887	1293.03		Iolite						0.282394	2.4e-05	1.46723	8.3e-05	1.88672	0.00012	0.0291	0.0048	0.00085	0.00013	10.82	28.643
NDZ08	RSH09A	118	118	15.2	2569.88	26.9197		0.000619	1.7e-05	0.280982	1.6e-05	0.280952	-6.37922	1.21869	3351.87		Iolite						0.280982	1.6e-05	1.46725	5.9e-05	1.88676	0.00012	0.02924	0.0006	0.00066	1.9e-05	12.64	29.692
NDZ08	RSH09A	120	120	15.2	780.06	42.858		0.00144	0.00013	0.282568	5.2e-05	0.282547	9.05307	2.84147	1056.64		Iolite						0.282568	5.2e-05	1.46749	0.00025	1.88656	0.00035	0.0563	0.0078	0.00156	0.00014	10.1	15.799
NDZ08	RSH09A	121	121	15.2	807.585	42.1453		0.000497	1.5e-05	0.28249	2.3e-05	0.282482	7.39389	1.76287	1171.97		Iolite						0.28249	2.3e-05	1.46727	7.1e-05	1.88681	0.00018	0.02105	0.00086	0.000544	1.6e-05	9.73	27.189
NDZ08	RSH09A	122	122	15.2	785.462	45.085		0.000648	4.3e-05	0.282485	1.9e-05	0.282475	6.64484	1.6969	1195.87		Iolite						0.282485	1.9e-05	1.46729	6.7e-05	1.88654	9.1e-05	0.027	0.0019	0.000715	4.8e-05	9.75	29.692
NDZ08	RSH09A	123	123	15.2	789.477	42.4158		0.0008	0.00011	0.282512	2.9e-05	0.2825	7.61024	2.02505	1145.13		Iolite						0.282512	2.9e-05	1.46728	7.8e-05	1.88675	0.00011	0.0356	0.0051	0.00089	0.00012	8.13	29.694
NDZ08	RSH09A	124	124	15.2	622.581	35.2892		0.00035	1.6e-05	0.281587	2.8e-05	0.281583	-28.6352	1.78277	3006.14		Iolite						0.281587	2.8e-05	1.46729	5.3e-05	1.88679	8.9e-05	0.01351	0.00083	0.000391	1.8e-05	12.07	29.694
NDZ08	RSH09A	125	125	15.2	817.523	43.2074		0.000315	1e-05	0.282472	2.2e-05	0.282467	7.07697	1.75385	1197.78		Iolite						0.282473	2.2e-05	1.46733	5.4e-05	1.88664	0.00011	0.01159	0.0003	0.000354	1.1e-05	11.6	28.64
NDZ08	RSH09A	127	127	15.2	1029.01	53.9		0.000242	5.2e-05	0.281625	2.3e-05	0.28162	-18.1437	2.06645	2756.58		Iolite						0.281625	2.3e-05	1.46727	5.8e-05	1.88672	8.7e-05	0.0121	0.0032	0.000275	5.9e-05	15.22	29.697
NDZ08	RSH09A	128	128	15.2	666.487	35.9199		0.000841	6.4e-05	0.282594	2.8e-05	0.282583	7.78571	1.8117	1035.23		Iolite						0.282594	2.8e-05	1.46742	0.00013	1.88659	0.00021	0.0351	0.0048	0.000959	7.2e-05	10	23.387
NDZ08	RSH09A	130	130	15.2	594.796	37.9912		0.000818	9.1e-05	0.282606	3.3e-05	0.282597	6.64494	2.04181	1040.95		Iolite						0.282606	3.3e-05	1.46729	7.7e-05	1.88669	0.00014	0.0417	0.0054	0.00094	0.0001	7.74	28.64
NDZ08	RSH09A	131	131	15.2	2092.97	32.1972		0.00136	0.00089	0.282141	2.5e-05	0.282087	22.8409	2.88966	1368.48		Iolite						0.282142	2.5e-05	1.46736	0.00011	1.88635	0.00036	0.079	0.053	0.0016	0.001	12.4	26.538
NDZ08	RSH09A	132	132	15.2	660.948	34.3145		0.0034	0.0012	0.281299	4.4e-05	0.281257	-39.3254	2.80663	3610.63		Iolite						0.281299	4.4e-05	1.4675	0.00013	1.88651	0.00017	0.193	0.062	0.0039	0.0013	10.9	23.382
NDZ08	RSH09A	134	134	15.2	576.116	32.1158		0.000367	5e-06	0.282438	2.1e-05	0.282434	0.459124	1.4603	1371.81		Iolite						0.282439	2.1e-05	1.46731	7.5e-05	1.88665	0.00014	0.01894	0.00036	0.00042	6e-06	10.18	29.694
NDZ08	RSH09A	135	135	15.2	582.885	30.5912		0.000327	1.8e-05	0.2819	2.4e-05	0.281896	-18.4246	1.53755	2419.84		Iolite						0.2819	2.4e-05	1.46733	5.1e-05	1.88659	0.00022	0.01582	0.00076	0.000375	2e-05	11.5	21.286
NDZ08	RSH09A	137	137	15.2	823.473	42.7634		0.001111	4e-05	0.282506	2.8e-05	0.282489	7.97724	1.95118	1152.27		Iolite						0.282506	2.8e-05	1.46727	7.8e-05	1.88682	0.00016	0.0531	0.0025	0.001261	4.5e-05	8.69	29.69
NDZ08	RSH09A	138	138	15.2	567.415	31.5951		0.000527	1.1e-05	0.28257	2.7e-05	0.282564	4.87895	1.66032	1117.75		Iolite						0.282571	2.7e-05	1.4673	6.5e-05	1.88679	0.00015	0.02485	0.00062	0.000594	1.3e-05	8.59	28.64
Sample RSH14A - Hammamat Group, Wadi Hammamat, Egypt (sandstone bedrock). Ages highlighted in yellow were derived from multiple analyses of a single grain.
NDZ08	RSH14A	1	1	10	853.077	25.9712		0.000925268	4.50857e-05	0.281927	5.44825e-05	0.281912	-11.7834	2.52768	2270.27		0.859116	1.00002		4.69613	0.0151		0.28192	3.4e-05	1.46721	0.000131	1.88692	0.000195	0.043145	0.002499	0.001077	1.4e-05	14.4079	13	15
NDZ08	RSH14A	2	2	10	873.129	30.6955		0.000743994	5.94588e-05	0.282509	4.84645e-05	0.282497	9.38479	2.43334	1113.95		0.859116	1.00002		4.69613	0.0151		0.282502	2.3e-05	1.46721	9.2e-05	1.88671	0.000146	0.030432	0.003177	0.000866	5.6e-05	6.92536	27	30
NDZ08	RSH14A	3	3	10	693.509	24.7201		0.000537807	8.46141e-05	0.282628	4.7564e-05	0.282621	9.72476	2.27428	948.378		0.859116	1.00002		4.69613	0.0151		0.282621	2.1e-05	1.46731	0.000126	1.8868	0.000153	0.020737	0.002566	0.000626	9.4e-05	12.943	27	30
NDZ08	RSH14A	4	4	10	655.865	24.612		0.000247425	1.73516e-05	0.282579	5.21606e-05	0.282576	7.28079	2.4061	1054.91		0.859116	1.00002		4.69613	0.0151		0.282572	3e-05	1.46725	8.1e-05	1.88684	0.000187	0.009631	0.000857	0.000288	1.5e-05	5.25869	27	30
NDZ08	RSH14A	6	6	10	775.213	24.6891		0.000875439	7.78862e-05	0.282693	5.84998e-05	0.28268	13.6687	2.65793	793.279		0.859116	1.00002		4.69613	0.0151		0.282686	4e-05	1.46723	6.1e-05	1.8867	0.000118	0.029616	0.001425	0.001019	7.7e-05	7.4329	22	23
NDZ08	RSH14A	7	7	10	719.919	23.5245		0.00117785	8.42692e-05	0.282703	4.89725e-05	0.282687	12.6606	2.28931	804.78		0.859116	1.00002		4.69613	0.0151		0.282696	2.4e-05	1.46734	8.6e-05	1.88691	0.000115	0.048899	0.001509	0.001371	7.4e-05	5.22864	27	30
NDZ08	RSH14A	8	8	10	700.085	21.8826		0.00105499	5.24389e-05	0.282612	5.1596e-05	0.282598	9.06269	2.33123	990.923		0.859116	1.00002		4.69613	0.0151		0.282605	2.9e-05	1.46724	7e-05	1.88698	0.00016	0.047032	0.001318	0.001228	2e-05	5.64971	28	30
NDZ08	RSH14A	9	9	10	664.139	25.5613		0.00157991	7.42744e-05	0.282592	5.4561e-05	0.282572	7.33661	2.51595	1058.51		0.859116	1.00002		4.69613	0.0151		0.282585	3.4e-05	1.46726	7e-05	1.88691	0.000147	0.067912	0.002041	0.001839	4e-06	3.79004	27	30
NDZ08	RSH14A	10	10	10	642	22		0.00123713	6.16475e-05	0.282526	5.58217e-05	0.282511	4.67838	2.47586	1189.72		0.859116	1.00002		4.69613	0.0151		0.282519	3.6e-05	1.46732	9.9e-05	1.88694	0.000162	0.06	0.002398	0.00144	2.4e-05	5.20393	27	30
NDZ08	RSH14A	11	11	10	674.652	18.6331		0.000774064	0.000110937	0.282616	5.04994e-05	0.282606	8.77489	2.25051	986.361		0.859116	1.00002		4.69613	0.0151		0.282609	2.7e-05	1.46735	8.5e-05	1.88672	0.000129	0.030456	0.003838	0.000901	0.000122	5.6482	27	30
NDZ08	RSH14A	12	12	10	1949.68	21.8228		0.000824751	4.74965e-05	0.280911	5.43627e-05	0.28088	-23.3371	2.48604	3761.93		0.859116	1.00002		4.69613	0.0151		0.280904	3.4e-05	1.46727	7.3e-05	1.88701	0.000139	0.034234	0.001443	0.00096	3.2e-05	5.91246	27	30
NDZ08	RSH14A	13	13	10	762.933	27.8554		0.000930423	4.63497e-05	0.282675	5.10486e-05	0.282662	12.7326	2.44534	835.936		0.859116	1.00002		4.69613	0.0151		0.282668	2.8e-05	1.46728	8.7e-05	1.88682	0.000135	0.041071	0.001588	0.001083	1.8e-05	5.34836	27	30
NDZ08	RSH14A	14	14	10	759.945	26.8019		0.00205758	0.00011614	0.282718	5.16092e-05	0.282689	13.6187	2.45824	783.58		0.859116	1.00002		4.69613	0.0151		0.282711	2.9e-05	1.46726	8.7e-05	1.88685	0.000173	0.087218	0.000812	0.002395	7.5e-05	5.00074	28	30
NDZ08	RSH14A	16	16	10	771.278	22.2274		0.00501466	0.000261751	0.282415	6.05612e-05	0.282342	1.60389	2.71122	1465.54		0.859116	1.00002		4.69613	0.0151		0.282408	4.3e-05	1.4672	9.2e-05	1.88694	0.000138	0.26013	0.008563	0.005837	0.000133	4.73483	27	30
NDZ08	RSH14A	19	19	10	710.775	19.5121		0.000581622	4.5255e-05	0.282621	5.45644e-05	0.282613	9.83952	2.38769	956.012		0.859116	1.00002		4.69613	0.0151		0.282614	3.4e-05	1.46729	7.8e-05	1.88687	0.000151	0.026994	0.002496	0.000677	4.2e-05	5.86031	29	30
NDZ08	RSH14A	20	20	10	994.191	33.8396		0.000691588	3.6743e-05	0.282382	5.51652e-05	0.282369	7.60367	2.73335	1312.14		0.859116	1.00002		4.69613	0.0151		0.282375	3.5e-05	1.4673	7.8e-05	1.88671	0.000211	0.029852	0.000941	0.000805	2e-05	5.24509	28	30
NDZ08	RSH14A	21	21	10	658.903	22.4453		0.000669251	4.59391e-05	0.282614	4.89608e-05	0.282606	8.40309	2.25101	994.411		0.859116	1.00002		4.69613	0.0151		0.282607	2.4e-05	1.46728	6.3e-05	1.88679	0.000112	0.029836	0.002611	0.000779	3.9e-05	6.0563	27	30
NDZ08	RSH14A	22	22	10	766.928	26.7919		0.00194504	9.64357e-05	0.28273	5.0514e-05	0.282702	14.2496	2.41152	753.744		0.859116	1.00002		4.69613	0.0151		0.282723	2.7e-05	1.46724	5.6e-05	1.88686	0.000131	0.070251	0.001183	0.002264	3.6e-05	6.05679	30	30
NDZ08	RSH14A	23	23	10	639	19		0.000945887	5.01119e-05	0.282091	5.57715e-05	0.28208	-10.6861	2.4124	2039.33		0.859116	1.00002		4.69613	0.0151		0.282084	3.6e-05	1.46731	9.8e-05	1.88671	0.000159	0.039986	0.00101	0.001101	2.7e-05	5.38088	29	30
NDZ08	RSH14A	24	24	10	1011.41	30.8064		0.000843652	4.42731e-05	0.281385	4.83151e-05	0.281369	-27.4538	2.42335	3245.78		0.859116	1.00002		4.69613	0.0151		0.281378	2.3e-05	1.46743	8e-05	1.8868	0.000195	0.029552	0.00105	0.000982	2.3e-05	5.68685	27	30
NDZ08	RSH14A	25	25	10	811.135	25.4471		0.00136342	7.52419e-05	0.282496	5.1026e-05	0.282475	7.21671	2.40216	1184.77		0.859116	1.00002		4.69613	0.0151		0.282489	2.8e-05	1.4673	7.3e-05	1.88686	0.000209	0.057663	0.000357	0.001587	4.6e-05	5.55194	27	30
NDZ08	RSH14A	26	26	10	652.463	24.0966		0.00151204	8.82523e-05	0.282594	5.39437e-05	0.282575	7.18612	2.46915	1057.46		0.859116	1.00002		4.69613	0.0151		0.282587	3.3e-05	1.46723	8.1e-05	1.88667	0.000156	0.059207	0.000772	0.00176	6.1e-05	4.5621	28	30
NDZ08	RSH14A	27	27	10	788.406	22.9737		0.00114348	5.84953e-05	0.282664	4.89674e-05	0.282647	12.7909	2.26853	853.511		0.859116	1.00002		4.69613	0.0151		0.282657	2.4e-05	1.46735	5.7e-05	1.88682	0.0001	0.037771	0.000801	0.001331	2.7e-05	8.18783	28	30
NDZ08	RSH14A	28	28	10	852.408	26.3824		0.00160483	8.59093e-05	0.282075	5.32752e-05	0.282049	-6.94119	2.5061	2003.74		0.859116	1.00002		4.69613	0.0151		0.282068	3.2e-05	1.46728	7e-05	1.88685	0.000155	0.074372	0.002572	0.001868	4.8e-05	6.18537	27	30
NDZ08	RSH14A	29	29	10	782.925	23.8457		0.000929564	5.71869e-05	0.282489	5.91659e-05	0.282475	6.58347	2.65103	1197.24		0.859116	1.00002		4.69613	0.0151		0.282482	4.1e-05	1.4673	8.5e-05	1.8868	0.000151	0.038409	0.00084	0.001082	4.3e-05	4.85959	29	30
NDZ08	RSH14A	30	30	10	686.636	21.1214		0.000553271	2.79529e-05	0.282602	5.78105e-05	0.282595	8.64422	2.52954	1003.46		0.859116	1.00002		4.69613	0.0151		0.282595	3.9e-05	1.4673	7.8e-05	1.88667	0.000185	0.019848	0.000998	0.000644	1.2e-05	5.09553	29	30
NDZ08	RSH14A	33	33	10	687.782	22.4845		0.00149057	0.000107522	0.282595	5.58297e-05	0.282576	7.992	2.51322	1040.99		0.859116	1.00002		4.69613	0.0151		0.282588	3.6e-05	1.46731	5.8e-05	1.88692	0.00017	0.066975	0.001218	0.001735	9.5e-05	5.26753	28	30
NDZ08	RSH14A	34	34	10	650.679	20.1065		0.00103523	6.10592e-05	0.282627	5.33418e-05	0.282614	8.52312	2.35584	980.976		0.859116	1.00002		4.69613	0.0151		0.28262	3.2e-05	1.46731	9.6e-05	1.88687	0.000152	0.049771	0.000582	0.001205	4.3e-05	6.23288	29	30
NDZ08	RSH14A	36	36	10	709.435	23.6209		0.00111771	8.31072e-05	0.282649	5.33445e-05	0.282634	10.548	2.4458	915.105		0.859116	1.00002		4.69613	0.0151		0.282642	3.2e-05	1.46723	5.8e-05	1.88689	0.000138	0.043895	0.004201	0.001301	7.5e-05	4.78407	29	30
NDZ08	RSH14A	37	37	10	682.202	19.7413		0.00204126	0.000104017	0.282342	5.04645e-05	0.282316	-1.33931	2.25398	1557.35		0.859116	1.00002		4.69613	0.0151		0.282335	2.7e-05	1.4673	8.4e-05	1.88687	0.000152	0.09374	0.001808	0.002376	4.7e-05	6.29263	27	30
NDZ08	RSH14A	38	38	10	720.577	22.5354		0.000633169	3.20749e-05	0.282316	5.1559e-05	0.282307	-0.77104	2.34103	1556.67		0.859116	1.00002		4.69613	0.0151		0.282309	2.9e-05	1.46722	5.8e-05	1.88678	0.000148	0.028664	0.00086	0.000737	1.4e-05	5.5634	27	30
NDZ08	RSH14A	39	39	10	705.88	21.1213		0.00230587	0.000135599	0.28273	4.94738e-05	0.282699	12.7802	2.26242	786.554		0.859116	1.00002		4.69613	0.0151		0.282723	2.5e-05	1.46727	7.1e-05	1.88681	0.000114	0.092564	0.00561	0.002684	9.5e-05	7.09667	27	30
NDZ08	RSH14A	40	40	10	637	16		0.000975956	5.52914e-05	0.282619	5.21655e-05	0.282608	7.06692	2.26947	1018.16		0.859116	1.00002		4.69613	0.0151		0.282612	3e-05	1.46724	8.5e-05	1.88681	0.000173	0.04158	0.001245	0.001136	3.6e-05	4.78089	27	30
NDZ08	RSH14A	42	42	10	652	13		0.00161084	7.64673e-05	0.282575	4.89557e-05	0.282555	6.29452	2.24533	1100.78		0.859116	1.00002		4.69613	0.0151		0.282568	2.4e-05	1.46726	6.3e-05	1.88678	0.000126	0.075419	0.002124	0.001875	1.3e-05	5.30798	28	30
NDZ08	RSH14A	43	43	10	630.725	19.5015		0.00152321	0.000100398	0.282599	5.33384e-05	0.282581	6.89064	2.35198	1056.36		0.859116	1.00002		4.69613	0.0151		0.282592	3.2e-05	1.46728	7.1e-05	1.88684	0.000182	0.07061	0.004639	0.001773	8.2e-05	5.32239	28	30
NDZ08	RSH14A	44	44	10	634.114	20.7348		0.000939873	4.70593e-05	0.282647	4.99759e-05	0.282636	8.9098	2.24473	945.762		0.859116	1.00002		4.69613	0.0151		0.28264	2.6e-05	1.46727	7e-05	1.88699	0.000158	0.042425	0.000938	0.001094	1.9e-05	6.08492	28	30
NDZ08	RSH14A	45	45	10	659.134	21.7358		0.000710489	7.48581e-05	0.282606	4.84774e-05	0.282597	8.10676	2.23069	1011.23		0.859116	1.00002		4.69613	0.0151		0.282599	2.3e-05	1.46723	9.3e-05	1.88677	0.000117	0.029988	0.002361	0.000827	7.8e-05	6.37854	27	30
NDZ08	RSH14A	46	46	10	745.629	25.0338		0.00199659	0.000206379	0.282673	4.99792e-05	0.282645	11.7513	2.40879	877.006		0.859116	1.00002		4.69613	0.0151		0.282666	2.6e-05	1.46728	5.5e-05	1.8867	0.000125	0.086554	0.010873	0.002324	0.000214	6.15164	27	30
NDZ08	RSH14A	47	47	10	635	18		0.000980251	0.000162171	0.282444	5.45435e-05	0.282432	1.94856	2.47908	1344.58		0.859116	1.00002		4.69613	0.0151		0.282437	3.4e-05	1.46731	8.5e-05	1.88706	0.000158	0.04575	0.008905	0.001141	0.000181	4.07925	27	30
NDZ08	RSH14A	48	48	10	676.821	20.0033		0.0011117	6.98411e-05	0.282578	5.91756e-05	0.282564	7.32454	2.56462	1069.5		0.859116	1.00002		4.69613	0.0151		0.282571	4.1e-05	1.46724	8.9e-05	1.88665	0.000165	0.035357	0.001543	0.001294	5.4e-05	4.04166	29	30
NDZ08	RSH14A	49	49	10	678.334	21.8626		0.000985406	4.74104e-05	0.282577	4.99669e-05	0.282564	7.37921	2.27061	1067.66		0.859116	1.00002		4.69613	0.0151		0.28257	2.6e-05	1.46731	6.1e-05	1.8868	0.000161	0.045541	0.001274	0.001147	1.2e-05	7.26566	27	30
NDZ08	RSH14A	51	51	10	708.924	21.4743		0.0018806	0.000249008	0.282655	5.71466e-05	0.28263	10.3887	2.60323	923.639		0.859116	1.00002		4.69613	0.0151		0.282648	3.8e-05	1.46722	6.5e-05	1.88657	0.000178	0.081232	0.011862	0.002189	0.000271	5.61205	29	30
NDZ08	RSH14A	52	52	10	623	17		0.000851384	0.000135748	0.282584	5.21612e-05	0.282574	6.55024	2.3612	1072.06		0.859116	1.00002		4.69613	0.0151		0.282577	3e-05	1.46732	9.3e-05	1.88672	0.000156	0.035523	0.006714	0.000991	0.000151	5.64112	27	30
NDZ08	RSH14A	53	53	10	660.758	20.0053		0.00291412	0.000153528	0.282629	5.21667e-05	0.282593	7.9869	2.32928	1019.28		0.859116	1.00002		4.69613	0.0151		0.282622	3e-05	1.46727	9.5e-05	1.88676	0.000188	0.133557	0.0072	0.003392	8.1e-05	7.23128	28	30
NDZ08	RSH14A	54	54	10	710.412	25.6952		0.00170878	0.000131323	0.282182	5.21115e-05	0.282159	-6.25169	2.46012	1852.12		0.859116	1.00002		4.69613	0.0151		0.282175	3e-05	1.46725	8.3e-05	1.88673	0.000194	0.072567	0.00239	0.001989	0.000121	4.78049	28	30
NDZ08	RSH14A	55	55	10	732.39	26.2963		0.000762895	3.7527e-05	0.282649	5.16006e-05	0.282638	11.2224	2.4275	895.931		0.859116	1.00002		4.69613	0.0151		0.282642	2.9e-05	1.46727	8.1e-05	1.8868	0.000191	0.028184	0.001093	0.000888	1.3e-05	5.99029	30	30
NDZ08	RSH14A	56	56	10	670.207	27.1522		0.0013617	8.54653e-05	0.282661	5.64872e-05	0.282644	10.0082	2.62821	913.439		0.859116	1.00002		4.69613	0.0151		0.282654	3.7e-05	1.46724	7.3e-05	1.8867	0.000194	0.060321	0.004517	0.001585	6.6e-05	4.48551	28	30
NDZ08	RSH14A	57	57	10	674.272	21.6225		0.000947605	4.63291e-05	0.282592	5.10381e-05	0.28258	7.83853	2.30316	1038.6		0.859116	1.00002		4.69613	0.0151		0.282585	2.8e-05	1.46727	5.9e-05	1.88674	0.000188	0.046359	0.001251	0.001103	1.5e-05	5.79373	27	30
NDZ08	RSH14A	58	58	10	658.924	21.9245		0.00128953	8.7801e-05	0.282662	5.10469e-05	0.282646	9.83117	2.32331	914.192		0.859116	1.00002		4.69613	0.0151		0.282655	2.8e-05	1.46728	6.9e-05	1.88691	0.000136	0.056775	0.004525	0.001501	7.4e-05	5.82775	28	30
NDZ08	RSH14A	59	59	10	659.446	23.6359		0.000836779	9.13583e-05	0.282564	5.27403e-05	0.282554	6.57071	2.42918	1097.63		0.859116	1.00002		4.69613	0.0151		0.282557	3.1e-05	1.46727	7.4e-05	1.88663	0.00012	0.035537	0.002883	0.000974	9.6e-05	6.79497	28	30
NDZ08	RSH14A	60	60	10	721.795	32.2117		0.000676124	3.61027e-05	0.282608	5.27456e-05	0.282599	9.57807	2.59948	979.684		0.859116	1.00002		4.69613	0.0151		0.282601	3.1e-05	1.46724	5.9e-05	1.88698	0.000147	0.030486	0.000299	0.000787	2e-05	5.10419	30	30
NDZ08	RSH14A	61	61	10	815.386	27.9876		0.00092355	4.91845e-05	0.282434	5.10181e-05	0.28242	5.35185	2.45096	1292.41		0.859116	1.00002		4.69613	0.0151		0.282427	2.8e-05	1.46726	5.2e-05	1.88683	9.3e-05	0.042776	0.00055	0.001075	2.7e-05	10.304	27	30
NDZ08	RSH14A	62	62	10	878.647	30.1538		0.000521483	2.45498e-05	0.28255	4.63068e-05	0.282541	11.0904	2.32861	1022.87		0.859116	1.00002		4.69613	0.0151		0.282543	1.8e-05	1.46731	3.7e-05	1.88685	0.000108	0.021988	0.000639	0.000607	2e-06	15.6794	29	30
NDZ08	RSH14A	63	63	10	834.934	23.9652		0.00294247	0.000168875	0.282671	4.46192e-05	0.282625	13.0531	2.17303	876.866		0.859116	1.00002		4.69613	0.0151		0.282664	1.3e-05	1.46727	5.6e-05	1.8869	0.000127	0.097026	0.002357	0.003425	0.000113	10.8241	27	30
NDZ08	RSH14A	64	64	10	731.985	24.2613		0.000784373	3.7638e-05	0.282475	4.43097e-05	0.282464	5.03966	2.12358	1242.18		0.859116	1.00002		4.69613	0.0151		0.282468	1.2e-05	1.4673	3.5e-05	1.88682	9.9e-05	0.031671	0.000697	0.000913	9e-06	16.1664	28	30
NDZ08	RSH14A	65	65	10	710.824	24.7886		0.00063145	3.06452e-05	0.282411	4.5547e-05	0.282403	2.37884	2.17717	1373.53		0.859116	1.00002		4.69613	0.0151		0.282404	1.6e-05	1.46729	5.4e-05	1.88673	9.2e-05	0.026932	0.000646	0.000735	9e-06	15.0833	27	30
NDZ08	RSH14A	66	66	10	764.777	27.2529		0.00121994	5.73482e-05	0.282664	4.84851e-05	0.282646	12.2358	2.34182	865.409		0.859116	1.00002		4.69613	0.0151		0.282657	2.3e-05	1.46724	5.3e-05	1.88677	0.00011	0.052955	0.000848	0.00142	3e-06	14.9181	29	30
NDZ08	RSH14A	67	67	10	704.966	24.2629		0.00260742	0.000135302	0.282743	4.94755e-05	0.282708	13.0797	2.32375	768.924		0.859116	1.00002		4.69613	0.0151		0.282736	2.5e-05	1.46726	4.8e-05	1.88675	0.000133	0.093139	0.003215	0.003035	6.7e-05	15.854	30	30
NDZ08	RSH14A	69	69	10	676.013	21.4141		0.000744854	5.94825e-05	0.282638	4.43334e-05	0.282629	9.59721	2.07031	941.278		0.859116	1.00002		4.69613	0.0151		0.282631	1.2e-05	1.46731	5.3e-05	1.88679	9.2e-05	0.033569	0.002711	0.000867	5.6e-05	15.8552	27	30
NDZ08	RSH14A	70	70	10	658.148	23.1654		0.000666674	9.14384e-05	0.282645	4.52387e-05	0.282637	9.48542	2.15585	932.996		0.859116	1.00002		4.69613	0.0151		0.282638	1.5e-05	1.46727	4.9e-05	1.8867	0.000109	0.029215	0.003435	0.000776	0.0001	15.9148	27	30
NDZ08	RSH14A	72	72	10	840.776	30.7756		0.00219934	0.000106048	0.282555	4.55674e-05	0.28252	9.48118	2.32756	1082.16		0.859116	1.00002		4.69613	0.0151		0.282548	1.6e-05	1.46729	3e-05	1.88691	7.4e-05	0.093978	0.001118	0.00256	2.8e-05	15.7832	27	30
NDZ08	RSH14A	73	73	10	640.606	23.1087		0.000870285	5.28484e-05	0.282664	4.75689e-05	0.282654	9.68377	2.21558	907.543		0.859116	1.00002		4.69613	0.0151		0.282657	2.1e-05	1.46735	5.2e-05	1.88672	9.3e-05	0.038173	0.001798	0.001013	3.9e-05	12.4403	28	30
NDZ08	RSH14A	74	74	10	649.971	20.1767		0.00127665	6.56023e-05	0.282644	4.71332e-05	0.282628	9.00516	2.13624	953.322		0.859116	1.00002		4.69613	0.0151		0.282637	2e-05	1.46726	4.8e-05	1.88669	8.2e-05	0.055955	0.001141	0.001486	3.1e-05	13.7465	27	30
NDZ08	RSH14A	75	75	10	681.731	21.808		0.00176119	9.09367e-05	0.282667	4.75693e-05	0.282644	10.2886	2.19385	907.074		0.859116	1.00002		4.69613	0.0151		0.28266	2.1e-05	1.46732	4.8e-05	1.88673	9.2e-05	0.06409	0.001713	0.00205	4.4e-05	12.7306	27	30
NDZ08	RSH14A	76	76	10	641	11		0.000548116	3.64257e-05	0.282097	4.74921e-05	0.282091	-11.2018	2.17753	2035.45		0.859116	1.00002		4.69613	0.0151		0.28209	2.1e-05	1.46731	5.6e-05	1.88672	0.000127	0.02112	0.000714	0.000638	3e-05	9.94678	29	30
NDZ08	RSH14A	77	77	10	737.792	25.976		0.00199401	0.000151754	0.282744	4.67314e-05	0.282716	14.1009	2.28505	738.235		0.859116	1.00002		4.69613	0.0151		0.282737	1.9e-05	1.46732	7.6e-05	1.88663	0.000114	0.068673	0.001964	0.002321	0.000139	14.2586	25	26
NDZ08	RSH14A	78	78	10	748.23	24.2427		0.0010318	5.14109e-05	0.28181	4.79042e-05	0.281795	-18.2817	2.25295	2542.43		0.859116	1.00002		4.69613	0.0151		0.281803	2.2e-05	1.46723	6.3e-05	1.8866	9.3e-05	0.038238	0.001033	0.001201	2e-05	11.2619	29	30
NDZ08	RSH14A	79	79	10	696.272	20.1751		0.00232047	0.000144242	0.282667	4.49202e-05	0.282637	10.34	2.08396	916.054		0.859116	1.00002		4.69613	0.0151		0.28266	1.4e-05	1.46735	6.1e-05	1.88684	8.4e-05	0.091453	0.002228	0.002701	0.00011	17.1418	27	30
NDZ08	RSH14A	81	81	10	2478.84	21.9481		0.000998293	7.49048e-05	0.281202	4.78226e-05	0.281155	-1.2881	2.32684	3005.12		0.859116	1.00002		4.69613	0.0151		0.281195	2.2e-05	1.46728	6.5e-05	1.88682	0.000112	0.042569	0.003484	0.001162	6.8e-05	10.4204	27	30
NDZ08	RSH14A	82	82	10	657.196	21.4492		0.00146136	6.98267e-05	0.282656	4.80177e-05	0.282638	9.50595	2.19493	931.066		0.859116	1.00002		4.69613	0.0151		0.282649	2.2e-05	1.46734	4.2e-05	1.88671	9.8e-05	0.061882	0.001235	0.001701	1.5e-05	15.1444	30	30
NDZ08	RSH14A	83	83	10	704.603	30.6755		0.0012397	7.77589e-05	0.282684	4.55856e-05	0.282668	11.6249	2.32004	850.578		0.859116	1.00002		4.69613	0.0151		0.282677	1.6e-05	1.4673	6.6e-05	1.88695	8.9e-05	0.043266	0.002857	0.001443	6e-05	11.5937	27	30
NDZ08	RSH14A	85	85	10	636.114	19.6907		0.00196652	0.000158541	0.282653	5.27511e-05	0.282629	8.73104	2.35534	957.436		0.859116	1.00002		4.69613	0.0151		0.282646	3.1e-05	1.46734	8.5e-05	1.8866	0.000212	0.079352	0.001209	0.002289	0.00015	10.0986	23	23
NDZ08	RSH14A	86	86	10	864.61	27.7416		0.00144503	7.28997e-05	0.282549	4.71202e-05	0.282525	10.2086	2.31459	1060.85		0.859116	1.00002		4.69613	0.0151		0.282542	2e-05	1.46724	7.2e-05	1.88675	0.000145	0.054622	0.002566	0.001682	3.1e-05	10.4682	27	30
NDZ08	RSH14A	87	87	10	680.64	24.2189		0.0013849	0.000124814	0.28267	4.89682e-05	0.282652	10.5423	2.3171	891.919		0.859116	1.00002		4.69613	0.0151		0.282663	2.4e-05	1.46723	7.7e-05	1.88678	0.000107	0.053281	0.005029	0.001612	0.000124	7.71001	27	30
NDZ08	RSH14A	88	88	10	649.794	21.6479		0.000507738	2.67058e-05	0.282664	4.55828e-05	0.282658	10.0425	2.10712	894.86		0.859116	1.00002		4.69613	0.0151		0.282657	1.6e-05	1.46725	4.5e-05	1.88683	9e-05	0.020509	0.000532	0.000591	1.4e-05	13.1244	29	30
NDZ08	RSH14A	89	89	10	631	13		0.00191325	0.000192376	0.282662	4.80185e-05	0.28264	8.36901	2.20616	950.828		0.859116	1.00002		4.69613	0.0151		0.282655	2.2e-05	1.4673	6.2e-05	1.88684	9.2e-05	0.088555	0.007508	0.002227	0.000198	10.2756	27	30
NDZ08	RSH14A	91	91	10	663.994	23.7653		0.00135483	6.802e-05	0.282689	4.71393e-05	0.282672	10.8684	2.21529	859.976		0.859116	1.00002		4.69613	0.0151		0.282682	2e-05	1.46725	6.4e-05	1.88678	0.000141	0.060964	0.001623	0.001577	2.8e-05	9.71981	27	30
NDZ08	RSH14A	92	92	10	663.609	21.0755		0.00144933	9.85755e-05	0.282662	4.94649e-05	0.282644	9.86209	2.2518	916.273		0.859116	1.00002		4.69613	0.0151		0.282655	2.5e-05	1.46724	6e-05	1.88674	0.000137	0.060933	0.002995	0.001687	8.3e-05	12.1934	30	30
NDZ08	RSH14A	93	93	10	668.391	18.2212		0.00142098	7.42887e-05	0.282695	4.67247e-05	0.282677	11.1467	2.08258	847.907		0.859116	1.00002		4.69613	0.0151		0.282688	1.9e-05	1.46729	6.3e-05	1.88679	9.3e-05	0.063367	0.002321	0.001654	3.8e-05	12.5375	27	30
NDZ08	RSH14A	94	94	10	691.731	20.7623		0.000919254	8.70591e-05	0.282687	5.21739e-05	0.282675	11.599	2.3452	841.51		0.859116	1.00002		4.69613	0.0151		0.28268	3e-05	1.46722	5.1e-05	1.88681	9.8e-05	0.039123	0.004163	0.00107	8.8e-05	12.9986	30	30
NDZ08	RSH14A	95	95	10	637.295	21.2784		0.000944169	6.05518e-05	0.282653	4.84836e-05	0.282642	9.19016	2.20983	932.597		0.859116	1.00002		4.69613	0.0151		0.282646	2.3e-05	1.46736	5.3e-05	1.88674	8.2e-05	0.039404	0.00129	0.001099	4.8e-05	9.34388	27	30
NDZ08	RSH14A	96	96	10	671.831	21.723		0.000607395	4.66726e-05	0.282181	4.48505e-05	0.282173	-6.61888	2.09052	1841.54		0.859116	1.00002		4.69613	0.0151		0.282174	1.4e-05	1.46732	3.9e-05	1.88684	0.000108	0.026105	0.001355	0.000707	4.3e-05	12.8473	27	30
NDZ08	RSH14A	97	97	10	737.685	24.2673		0.00257821	0.000171269	0.282727	4.55917e-05	0.282691	13.2091	2.20849	788.428		0.859116	1.00002		4.69613	0.0151		0.28272	1.6e-05	1.46723	4.5e-05	1.88685	0.000124	0.095201	0.005134	0.003001	0.000141	11.8107	27	30
NDZ08	RSH14A	98	98	10	762.156	29.2424		0.00075774	4.9469e-05	0.282675	4.80202e-05	0.282664	12.8034	2.37362	831.318		0.859116	1.00002		4.69613	0.0151		0.282668	2.2e-05	1.46721	7.5e-05	1.88675	0.000128	0.029171	0.001843	0.000882	4e-05	11.1338	27	30
NDZ08	RSH14A	99	99	10	719.434	28.2776		0.00227923	0.000111415	0.282702	4.67256e-05	0.282671	12.0863	2.30621	836.73		0.859116	1.00002		4.69613	0.0151		0.282695	1.9e-05	1.46727	5.5e-05	1.88678	8.3e-05	0.094575	0.003237	0.002653	3.6e-05	9.77536	29	30
NDZ08	RSH14A	100	100	10	738.216	25.9029		0.00257649	0.000128109	0.282756	4.63355e-05	0.28272	14.2482	2.24733	730.275		0.859116	1.00002		4.69613	0.0151		0.282749	1.8e-05	1.46725	6.5e-05	1.88682	9.1e-05	0.098513	0.002557	0.002999	4.9e-05	11.2142	27	30
NDZ08	RSH14A	103	103	10	969.204	28.2516		0.00169933	8.11283e-05	0.282482	4.75442e-05	0.282451	9.93904	2.34822	1161.34		0.859116	1.00002		4.69613	0.0151		0.282475	2.1e-05	1.46721	6.6e-05	1.88688	0.000127	0.063032	0.002079	0.001978	1.7e-05	12.0716	27	30
NDZ08	RSH14A	104	104	10	647.941	22.4151		0.00118558	0.000106006	0.282605	4.84772e-05	0.282591	7.61926	2.25175	1029.48		0.859116	1.00002		4.69613	0.0151		0.282598	2.3e-05	1.46724	5.4e-05	1.88686	0.000102	0.054593	0.004574	0.00138	0.000105	9.02343	27	30
NDZ08	RSH14A	105	105	10	636.13	20.9841		0.00304041	0.000372922	0.28267	4.99789e-05	0.282634	8.87834	2.36353	949.173		0.859116	1.00002		4.69613	0.0151		0.282663	2.6e-05	1.46726	5.6e-05	1.88669	9.9e-05	0.105722	0.011184	0.003539	0.000401	9.5105	27	30
NDZ08	RSH14A	106	106	10	663.099	22.0112		0.00140208	8.63351e-05	0.282642	4.84821e-05	0.282625	9.16365	2.2323	955.113		0.859116	1.00002		4.69613	0.0151		0.282635	2.3e-05	1.4672	5.9e-05	1.88682	0.000145	0.058038	0.003843	0.001632	6.5e-05	10.3674	29	30
NDZ08	RSH14A	107	107	10	668.135	21.2914		0.00117355	5.54387e-05	0.282645	4.89649e-05	0.28263	9.4805	2.22323	941.414		0.859116	1.00002		4.69613	0.0151		0.282638	2.4e-05	1.46727	5.1e-05	1.88682	0.000112	0.041084	0.000929	0.001366	7e-06	11.9913	20	23
NDZ08	RSH14A	108	108	10	646.707	23.1059		0.00108077	5.47826e-05	0.282733	4.8028e-05	0.28272	12.1707	2.22981	772.495		0.859116	1.00002		4.69613	0.0151		0.282726	2.2e-05	1.46726	7.9e-05	1.88669	0.000109	0.038627	0.000858	0.001258	2.4e-05	10.3562	27	30
NDZ08	RSH14A	110	110	10	627.621	24.0389		0.00155328	8.06336e-05	0.282732	5.45776e-05	0.282714	11.5212	2.48476	793.499		0.859116	1.00002		4.69613	0.0151		0.282725	3.4e-05	1.46728	7.1e-05	1.88687	0.000169	0.077437	0.002667	0.001808	4e-05	5.13291	27	30
NDZ08	RSH14A	111	111	10	648.416	19.4584		0.00103352	5.27334e-05	0.282637	4.67167e-05	0.282624	8.82856	2.10322	961.977		0.859116	1.00002		4.69613	0.0151		0.28263	1.9e-05	1.46729	6.4e-05	1.88681	0.000123	0.035716	0.000651	0.001203	2.4e-05	9.52984	27	30
NDZ08	RSH14A	112	112	10	786.144	26.0518		0.00433252	0.000229663	0.282625	5.10423e-05	0.282561	9.68685	2.44609	1026.06		0.859116	1.00002		4.69613	0.0151		0.282618	2.8e-05	1.46733	6.2e-05	1.88654	0.000115	0.144049	0.00311	0.005043	0.000124	6.50093	27	30
Sample SD02A - White Nile, Esh Shawal, Sudan (modern river sand)
NDZ15	SD02A	1	1	10	527.328	27.5797		0.000109108	5.40427e-06	0.282372	4.40343e-05	0.282371	-2.8715	2.1787	1518.03		0.859116	1.00002		4.69613	0.0151		0.282365	1.1e-05	1.46726	3.5e-05	1.88683	8.4e-05	0.006655	0.000255	0.000127	2e-06	21.5222	28	30
NDZ15	SD02A	2	2	10	804.775	72.0091		0.000579044	7.87292e-05	0.282562	4.52269e-05	0.282553	9.83826	3.25066	1032.77		0.859116	1.00002		4.69613	0.0151		0.282555	1.5e-05	1.46719	4.7e-05	1.88675	8.2e-05	0.029499	0.003175	0.000674	8.6e-05	13.4503	29	30
NDZ15	SD02A	3	3	10	650.393	30.734		0.00030155	4.93278e-05	0.282552	4.59276e-05	0.282548	6.17869	2.33569	1112.24		0.859116	1.00002		4.69613	0.0151		0.282545	1.7e-05	1.46721	4.7e-05	1.88679	0.000136	0.013962	0.002199	0.000351	5.5e-05	16.7597	27	30
NDZ15	SD02A	4	4	10	746.823	38.1293		0.000679561	3.24748e-05	0.282537	4.45999e-05	0.282527	7.61525	2.44112	1110.15		0.859116	1.00002		4.69613	0.0151		0.28253	1.3e-05	1.46724	5.2e-05	1.88675	8.7e-05	0.035656	0.00096	0.000791	7e-06	16.4469	27	30
NDZ15	SD02A	5	5	10	579.463	26.8406		0.00123541	7.06847e-05	0.282585	4.63117e-05	0.282572	5.40399	2.25043	1098.09		0.859116	1.00002		4.69613	0.0151		0.282578	1.8e-05	1.46729	3.9e-05	1.88684	8.5e-05	0.064741	0.001483	0.001438	4.7e-05	17.9437	29	30
NDZ15	SD02A	7	7	10	930.501	43.7693		0.000588494	3.44806e-05	0.281914	4.42281e-05	0.281904	-10.3321	2.56366	2252.38		0.859116	1.00002		4.69613	0.0151		0.281907	1.2e-05	1.46724	3.4e-05	1.88678	6.8e-05	0.027125	0.001795	0.000685	2.4e-05	17.609	27	30
NDZ15	SD02A	8	8	10	617.857	31.6898		0.000472514	2.22065e-05	0.282517	4.63022e-05	0.282512	4.14247	2.35316	1199.84		0.859116	1.00002		4.69613	0.0151		0.28251	1.8e-05	1.46728	4.3e-05	1.88689	8.9e-05	0.022324	0.00057	0.00055	1e-06	14.4053	30	30
NDZ15	SD02A	9	9	10	738.599	34.436		0.000646055	3.33083e-05	0.282523	4.48995e-05	0.282514	6.95386	2.37066	1140.49		0.859116	1.00002		4.69613	0.0151		0.282516	1.4e-05	1.46724	4.1e-05	1.88675	8.2e-05	0.031903	0.000766	0.000752	1.6e-05	16.8726	27	30
NDZ15	SD02A	10	10	10	653.285	31.818		0.000472514	2.22065e-05	0.282517	4.63022e-05	0.282511	4.92934	2.35725	1184.53		0.859116	1.00002		4.69613	0.0151		0.28251	1.8e-05	1.46728	4.3e-05	1.88689	8.9e-05	0.022324	0.00057	0.00055	1e-06	14.4053	30	30
NDZ15	SD02A	11	11	10	687.378	31.7828		0.00081616	3.9279e-05	0.282556	4.63077e-05	0.282545	6.911	2.3588	1101.26		0.859116	1.00002		4.69613	0.0151		0.282549	1.8e-05	1.46724	4.7e-05	1.88678	8.9e-05	0.040419	0.001522	0.00095	1e-05	16.4902	29	30
NDZ15	SD02A	12	12	10	779.332	38.0125		0.000614268	0.000102924	0.282434	4.55502e-05	0.282425	4.7201	2.51346	1298.42		0.859116	1.00002		4.69613	0.0151		0.282427	1.6e-05	1.46726	4.5e-05	1.88678	7.1e-05	0.033151	0.005903	0.000715	0.000115	15.1554	28	30
NDZ15	SD02A	13	13	10	1021.41	53.0498		0.000678702	3.8434e-05	0.281433	4.65506e-05	0.28142	-25.4191	2.85532	3144.07		0.859116	1.00002		4.69613	0.0151		0.281426	1.9e-05	1.46723	8.7e-05	1.88677	9.3e-05	0.032436	0.001494	0.00079	2.5e-05	14.8025	28	30
NDZ15	SD02A	14	14	10	598.937	27.9335		0.00038832	1.83168e-05	0.282269	4.75154e-05	0.282265	-5.02579	2.31138	1695.05		0.859116	1.00002		4.69613	0.0151		0.282262	2.1e-05	1.46728	5e-05	1.88681	8.9e-05	0.014499	0.000498	0.000452	2e-06	15.4699	30	30
NDZ15	SD02A	15	15	10	575.087	26.7671		0.000929564	5.11364e-05	0.28257	4.67074e-05	0.28256	4.8951	2.26018	1123.06		0.859116	1.00002		4.69613	0.0151		0.282563	1.9e-05	1.46722	4.4e-05	1.88675	0.00011	0.044807	0.002398	0.001082	3.1e-05	13.5405	27	30
NDZ15	SD02A	16	16	10	585.137	27.2415		0.000352238	1.65638e-05	0.28229	4.45642e-05	0.282286	-4.57483	2.19104	1658.99		0.859116	1.00002		4.69613	0.0151		0.282283	1.3e-05	1.46725	4.5e-05	1.88685	6.8e-05	0.012707	0.000367	0.00041	1e-06	19.4517	27	30
NDZ15	SD02A	17	17	10	654.054	30.6037		0.00108678	0.000202418	0.282566	4.67069e-05	0.282553	6.41407	2.41432	1102.03		0.859116	1.00002		4.69613	0.0151		0.282559	1.9e-05	1.46734	4.7e-05	1.88684	8.8e-05	0.050571	0.009026	0.001265	0.000228	14.6812	29	30
NDZ15	SD02A	18	18	10	590.517	30.3951		0.000579044	5.22992e-05	0.282195	4.62574e-05	0.282189	-7.90828	2.33135	1847.83		0.859116	1.00002		4.69613	0.0151		0.282188	1.8e-05	1.46728	4.5e-05	1.88674	9.1e-05	0.029113	0.001722	0.000674	5.2e-05	16.4099	30	30
NDZ15	SD02A	19	19	10	586.93	29.8856		0.000608254	4.02454e-05	0.282541	4.49021e-05	0.282534	4.2529	2.26716	1168.61		0.859116	1.00002		4.69613	0.0151		0.282534	1.4e-05	1.46727	4.1e-05	1.88683	9.1e-05	0.028864	0.000884	0.000708	3.3e-05	15.5257	28	30
NDZ15	SD02A	20	20	10	646.352	29.4275		0.00106273	0.000226363	0.282503	4.52185e-05	0.28249	4.02532	2.3457	1229.46		0.859116	1.00002		4.69613	0.0151		0.282496	1.5e-05	1.46725	3.5e-05	1.88672	8.4e-05	0.059808	0.014183	0.001237	0.000257	20.3565	29	30
NDZ15	SD02A	21	21	10	970.717	46.3833		0.00134194	8.71092e-05	0.28248	4.59175e-05	0.282455	10.1328	2.69812	1151.74		0.859116	1.00002		4.69613	0.0151		0.282473	1.7e-05	1.46725	3.4e-05	1.8868	9.2e-05	0.062291	0.001257	0.001562	7e-05	16.529	27	30
NDZ15	SD02A	22	22	10	700.562	41.4602		0.000596227	9.69172e-05	0.282557	4.67056e-05	0.282549	7.33936	2.6217	1087.97		0.859116	1.00002		4.69613	0.0151		0.28255	1.9e-05	1.46727	3.9e-05	1.88681	8.6e-05	0.028086	0.003936	0.000694	0.000108	15.011	27	30
NDZ15	SD02A	23	23	10	673.956	35.0871		0.000348801	2.31248e-05	0.282537	4.84682e-05	0.282533	6.15263	2.51089	1132.83		0.859116	1.00002		4.69613	0.0151		0.28253	2.3e-05	1.46718	5e-05	1.88674	8.9e-05	0.015313	0.000392	0.000406	1.9e-05	14.2592	30	30
NDZ15	SD02A	24	24	10	622.647	35.0541		0.000529215	2.69061e-05	0.282343	4.42905e-05	0.282337	-1.9365	2.35715	1542.63		0.859116	1.00002		4.69613	0.0151		0.282336	1.2e-05	1.46732	4.4e-05	1.88689	8.5e-05	0.025901	0.000909	0.000616	1.2e-05	15.1824	27	30
NDZ15	SD02A	25	25	10	596.63	31.3584		0.000278354	1.33235e-05	0.282254	4.48609e-05	0.282251	-5.56454	2.29373	1723.05		0.859116	1.00002		4.69613	0.0151		0.282247	1.4e-05	1.46732	5.1e-05	1.8869	9.4e-05	0.012801	0.000314	0.000324	3e-06	16.7496	29	30
NDZ15	SD02A	26	26	10	583.585	27.2631		0.00065121	3.06901e-05	0.282537	4.49015e-05	0.28253	4.02065	2.20425	1178.9		0.859116	1.00002		4.69613	0.0151		0.28253	1.4e-05	1.46723	3.4e-05	1.88683	8e-05	0.031245	0.000698	0.000758	3e-06	16.6509	28	30
NDZ15	SD02A	27	27	10	764.45	42.3083		0.00165122	0.000189294	0.282586	4.75583e-05	0.282562	9.24563	2.69637	1033.12		0.859116	1.00002		4.69613	0.0151		0.282579	2.1e-05	1.46718	4.3e-05	1.88681	0.000114	0.075457	0.005959	0.001922	0.000201	11.3025	28	30
NDZ15	SD02A	28	28	10	975.155	44.9607		0.000309282	2.73681e-05	0.282426	4.52075e-05	0.28242	8.98919	2.63266	1219.29		0.859116	1.00002		4.69613	0.0151		0.282419	1.5e-05	1.46729	4.6e-05	1.88691	8.1e-05	0.010697	0.001083	0.00036	2.7e-05	12.4169	30	30
NDZ15	SD02A	29	29	10	615.701	32.5039		0.000512892	4.33833e-05	0.282285	4.45635e-05	0.282279	-4.13758	2.31728	1659.24		0.859116	1.00002		4.69613	0.0151		0.282278	1.3e-05	1.46725	3.9e-05	1.88687	8.8e-05	0.024906	0.001507	0.000597	4.2e-05	14.5405	27	30
NDZ15	SD02A	30	30	10	760.856	37.3005		0.000639182	3.06133e-05	0.282526	4.75502e-05	0.282517	7.55669	2.52788	1124.84		0.859116	1.00002		4.69613	0.0151		0.282519	2.1e-05	1.46727	5.2e-05	1.88677	9.4e-05	0.029429	0.00077	0.000744	7e-06	12.0931	27	30
NDZ15	SD02A	31	31	10	743.977	34.0581		0.000673547	4.92892e-05	0.282508	4.59215e-05	0.282499	6.52802	2.40633	1168.7		0.859116	1.00002		4.69613	0.0151		0.282501	1.7e-05	1.46725	5.3e-05	1.88686	8.7e-05	0.032899	0.002632	0.000784	4.4e-05	13.4817	30	30
NDZ15	SD02A	32	32	10	643.673	40.0326		0.000955337	0.000124355	0.282567	5.10349e-05	0.282555	6.27945	2.74105	1101.14		0.859116	1.00002		4.69613	0.0151		0.28256	2.8e-05	1.46723	4e-05	1.88687	0.000116	0.045681	0.004585	0.001112	0.000135	12.1758	30	30
NDZ15	SD02A	33	33	10	750.347	33.0732		0.000522343	2.62873e-05	0.282267	4.51849e-05	0.28226	-1.79226	2.34944	1637.32		0.859116	1.00002		4.69613	0.0151		0.28226	1.5e-05	1.46725	3.5e-05	1.88684	9e-05	0.024975	0.000353	0.000608	1.1e-05	13.9735	29	30
NDZ15	SD02A	35	35	10	594.449	33.2046		0.000358251	1.78665e-05	0.282332	4.48721e-05	0.282328	-2.88279	2.33561	1572.55		0.859116	1.00002		4.69613	0.0151		0.282325	1.4e-05	1.4673	4.1e-05	1.88682	8.1e-05	0.017124	0.000327	0.000417	7e-06	14.0662	28	30
NDZ15	SD02A	36	36	10	1026.94	52.7822		0.00079726	4.74869e-05	0.282441	4.71054e-05	0.282426	10.3508	2.87594	1185.47		0.859116	1.00002		4.69613	0.0151		0.282434	2e-05	1.4672	4.3e-05	1.88675	0.000104	0.036644	0.000626	0.000928	3.4e-05	14.5973	28	30
NDZ15	SD02A	37	37	10	841.616	45.2337		0.000737981	7.09033e-05	0.28239	4.5544e-05	0.282378	4.47425	2.65721	1362.63		0.859116	1.00002		4.69613	0.0151		0.282383	1.6e-05	1.46722	3e-05	1.88681	7.9e-05	0.030345	0.001725	0.000859	7.2e-05	15.7123	29	30
NDZ15	SD02A	38	38	10	667.029	37.7214		0.000494851	3.5346e-05	0.282575	4.4907e-05	0.282569	7.27897	2.44553	1064.09		0.859116	1.00002		4.69613	0.0151		0.282568	1.4e-05	1.46727	4.5e-05	1.88681	9.2e-05	0.023116	0.000769	0.000576	3.1e-05	14.0325	27	30
NDZ15	SD02A	39	39	10	811.873	41.5496		0.000494851	2.50869e-05	0.282504	4.52186e-05	0.282496	7.98688	2.54279	1142.28		0.859116	1.00002		4.69613	0.0151		0.282497	1.5e-05	1.46723	3.3e-05	1.88671	9.1e-05	0.022297	0.000875	0.000576	1.1e-05	16.9065	29	30
NDZ15	SD02A	40	40	10	1125.63	64.2245		0.00057303	2.98367e-05	0.282201	4.51755e-05	0.282189	4.20335	3.06343	1608.05		0.859116	1.00002		4.69613	0.0151		0.282194	1.5e-05	1.46723	5.1e-05	1.88677	8.9e-05	0.025598	0.00016	0.000667	1.5e-05	14.9637	27	30
NDZ15	SD02A	41	41	10	901.759	42.5199		0.000536088	3.48204e-05	0.28205	4.5154e-05	0.282041	-6.12025	2.56941	1998.03		0.859116	1.00002		4.69613	0.0151		0.282043	1.5e-05	1.46723	3.5e-05	1.88672	0.0001	0.02634	0.001503	0.000624	2.8e-05	18.5041	27	30
NDZ15	SD02A	42	42	10	816.479	36.2845		0.000575608	3.29837e-05	0.282479	4.55566e-05	0.28247	7.15981	2.43985	1192.3		0.859116	1.00002		4.69613	0.0151		0.282472	1.6e-05	1.46727	4.6e-05	1.88685	0.000109	0.026592	0.001587	0.00067	2.2e-05	12.5579	27	30
NDZ15	SD02A	43	43	10	647.156	36.7394		0.000512892	2.90962e-05	0.282365	4.51988e-05	0.282359	-0.60727	2.42917	1488.44		0.859116	1.00002		4.69613	0.0151		0.282358	1.5e-05	1.46729	5.4e-05	1.887	8.7e-05	0.022547	0.000323	0.000597	1.9e-05	12.0769	28	30
NDZ15	SD02A	44	44	10	764.726	40.8413		0.000304986	1.55339e-05	0.282554	4.63074e-05	0.28255	8.80485	2.56384	1058.06		0.859116	1.00002		4.69613	0.0151		0.282547	1.8e-05	1.46723	4.8e-05	1.88671	8.5e-05	0.013703	0.000541	0.000355	7e-06	14.4639	30	30
NDZ15	SD02A	45	45	10	598.314	28.0424		0.000425262	2.11205e-05	0.282258	4.79643e-05	0.282253	-5.44387	2.33013	1717.71		0.859116	1.00002		4.69613	0.0151		0.282251	2.2e-05	1.46723	3.8e-05	1.88684	8.8e-05	0.020045	0.00086	0.000495	8e-06	14.5649	29	30
NDZ15	SD02A	46	46	10	610.651	31.2802		0.000701039	4.07737e-05	0.28263	4.52366e-05	0.282622	7.8911	2.30949	983.893		0.859116	1.00002		4.69613	0.0151		0.282623	1.5e-05	1.46725	4.5e-05	1.88672	7.9e-05	0.035325	0.001537	0.000816	2.8e-05	14.1023	27	30
NDZ15	SD02A	47	47	10	594.927	32.744		0.000450177	2.3157e-05	0.282303	4.55317e-05	0.282298	-3.93547	2.34883	1631.37		0.859116	1.00002		4.69613	0.0151		0.282296	1.6e-05	1.46724	3.4e-05	1.88676	9.3e-05	0.02181	0.000975	0.000524	1.1e-05	14.3815	27	30
NDZ15	SD02A	48	48	10	765.933	34.3902		0.000956196	7.16574e-05	0.282504	4.48968e-05	0.28249	6.7279	2.38399	1175.36		0.859116	1.00002		4.69613	0.0151		0.282497	1.4e-05	1.46725	3.8e-05	1.88687	6.7e-05	0.043229	0.004028	0.001113	6.5e-05	19.8736	30	30
NDZ15	SD02A	49	49	10	638.617	33.0826		0.00075774	6.62167e-05	0.282615	4.52344e-05	0.282606	7.95269	2.36068	1003.19		0.859116	1.00002		4.69613	0.0151		0.282608	1.5e-05	1.46726	4.4e-05	1.88682	9.2e-05	0.03156	0.003139	0.000882	6.5e-05	14.8906	27	30
NDZ15	SD02A	50	50	10	772.58	38.6206		0.002549	0.000276409	0.28263	4.75643e-05	0.282593	10.5162	2.64196	968.443		0.859116	1.00002		4.69613	0.0151		0.282623	2.1e-05	1.46722	4.7e-05	1.88688	0.000116	0.119902	0.009965	0.002967	0.00029	11.6236	27	30
NDZ15	SD02A	51	51	10	629.83	31.1125		0.000741417	3.56661e-05	0.28259	4.84752e-05	0.282581	6.88067	2.41819	1056.19		0.859116	1.00002		4.69613	0.0151		0.282583	2.3e-05	1.46722	5e-05	1.8868	0.000101	0.031157	0.000474	0.000863	9e-06	12.5819	30	30
NDZ15	SD02A	52	52	10	992.723	51.1767		0.000516329	2.92299e-05	0.281613	4.4769e-05	0.281603	-19.5678	2.74884	2805.2		0.859116	1.00002		4.69613	0.0151		0.281606	1.4e-05	1.46723	5.2e-05	1.88673	8.9e-05	0.022149	0.001192	0.000601	1.9e-05	13.8618	27	30
NDZ15	SD02A	54	54	10	1031.43	59.6166		0.0010275	5.28171e-05	0.282407	4.45811e-05	0.282387	9.08626	2.93326	1259.77		0.859116	1.00002		4.69613	0.0151		0.2824	1.3e-05	1.46726	4.7e-05	1.88677	9.9e-05	0.046351	0.000991	0.001196	2.5e-05	13.9443	27	30
NDZ15	SD02A	55	55	10	568.144	28.1069		0.000409798	1.92638e-05	0.282302	4.42845e-05	0.282298	-4.54967	2.19994	1643.98		0.859116	1.00002		4.69613	0.0151		0.282295	1.2e-05	1.46721	3.3e-05	1.88676	8.2e-05	0.015357	0.000309	0.000477	1e-06	16.1123	27	30
NDZ15	SD02A	57	57	10	991.63	50.3556		0.00132819	7.62249e-05	0.282446	4.55519e-05	0.282421	9.39274	2.76666	1210.18		0.859116	1.00002		4.69613	0.0151		0.282439	1.6e-05	1.46727	4.4e-05	1.88672	0.000101	0.060879	0.002548	0.001546	5.1e-05	15.3103	27	30
NDZ15	SD02A	58	58	10	579.892	31.7007		0.000305845	1.47683e-05	0.282247	4.5182e-05	0.282244	-6.1962	2.31224	1744.64		0.859116	1.00002		4.69613	0.0151		0.28224	1.5e-05	1.46723	3.9e-05	1.88676	7.2e-05	0.015704	0.00066	0.000356	4e-06	15.5922	27	30
NDZ15	SD02A	59	59	10	674.961	58.3111		0.000309282	1.51462e-05	0.282333	4.5536e-05	0.282329	-1.03219	2.92303	1534.46		0.859116	1.00002		4.69613	0.0151		0.282326	1.6e-05	1.46725	3.9e-05	1.88683	8.7e-05	0.014562	0.000195	0.00036	5e-06	14.4272	27	30
NDZ15	SD02A	60	60	10	655.947	31.5792		0.000992279	4.6883e-05	0.282515	4.55617e-05	0.282503	4.69047	2.32608	1200.05		0.859116	1.00002		4.69613	0.0151		0.282508	1.6e-05	1.46725	4.4e-05	1.88682	8.1e-05	0.042408	0.001176	0.001155	6e-06	20.0411	27	30
NDZ15	SD02A	61	61	10	631.332	33.116		0.000474232	3.34171e-05	0.282278	4.6269e-05	0.282272	-4.02285	2.38847	1665.41		0.859116	1.00002		4.69613	0.0151		0.282271	1.8e-05	1.46728	3.8e-05	1.88684	5.3e-05	0.024827	0.000848	0.000552	2.9e-05	16.7615	28	30
NDZ15	SD02A	62	62	10	1054.56	62.7407		0.000801555	4.25132e-05	0.282422	4.5207e-05	0.282406	10.2873	3.02813	1211.59		0.859116	1.00002		4.69613	0.0151		0.282415	1.5e-05	1.46729	4.7e-05	1.8869	9.3e-05	0.034357	0.001762	0.000933	2.3e-05	15.6458	28	30
NDZ15	SD02A	63	63	10	991.597	50.116		0.000905508	8.97518e-05	0.282441	4.75387e-05	0.282424	9.49517	2.85559	1204.43		0.859116	1.00002		4.69613	0.0151		0.282434	2.1e-05	1.46727	5.3e-05	1.88684	9.1e-05	0.03747	0.002569	0.001054	9.2e-05	14.3103	30	30
NDZ15	SD02A	64	64	10	895.558	38.7117		0.00205672	0.000227689	0.28243	4.55497e-05	0.282395	6.29685	2.58003	1304.79		0.859116	1.00002		4.69613	0.0151		0.282423	1.6e-05	1.46727	3.8e-05	1.88675	8.5e-05	0.099649	0.015814	0.002394	0.00024	17.7107	27	30
NDZ15	SD02A	65	65	10	713.979	32.5616		0.000459627	2.21917e-05	0.282503	4.66982e-05	0.282497	5.78912	2.39022	1185.67		0.859116	1.00002		4.69613	0.0151		0.282496	1.9e-05	1.46727	5.1e-05	1.88677	7.5e-05	0.021643	0.00038	0.000535	6e-06	16.5597	30	30
NDZ15	SD02A	66	66	10	766.243	38.3288		0.000590213	3.17392e-05	0.282509	4.63011e-05	0.2825	7.09891	2.50852	1154.85		0.859116	1.00002		4.69613	0.0151		0.282502	1.8e-05	1.46728	4.8e-05	1.88671	7.4e-05	0.02859	0.000788	0.000687	1.8e-05	13.832	27	30
NDZ15	SD02A	67	67	10	796.557	37.6136		0.00117183	7.03431e-05	0.282548	4.80032e-05	0.28253	8.84448	2.56114	1081.78		0.859116	1.00002		4.69613	0.0151		0.282541	2.2e-05	1.46726	6.6e-05	1.88675	7.2e-05	0.045968	0.003023	0.001364	5.1e-05	12.287	30	30
NDZ15	SD02A	68	68	10	585.483	32.6913		0.000343646	1.82824e-05	0.282318	4.45682e-05	0.282314	-3.57231	2.31357	1603.64		0.859116	1.00002		4.69613	0.0151		0.282311	1.3e-05	1.46727	4e-05	1.88677	7.1e-05	0.015893	0.000831	0.0004	1e-05	16.0141	27	30
NDZ15	SD02A	69	69	10	702.721	35.0069		0.000443304	2.14468e-05	0.28252	4.79994e-05	0.282514	6.14834	2.49048	1156.43		0.859116	1.00002		4.69613	0.0151		0.282513	2.2e-05	1.46728	3.5e-05	1.88677	8.3e-05	0.020764	0.000471	0.000516	6e-06	14.3189	30	30
NDZ15	SD02A	70	70	10	586.914	30.8805		0.000520624	2.93975e-05	0.282308	4.75206e-05	0.282302	-3.96372	2.37869	1626.51		0.859116	1.00002		4.69613	0.0151		0.282301	2.1e-05	1.46725	3.8e-05	1.88677	0.000107	0.024732	0.000446	0.000606	1.9e-05	12.9759	30	30
NDZ15	SD02A	71	71	10	577.416	34.7731		0.000811865	5.67956e-05	0.282587	5.10375e-05	0.282578	5.59325	2.59431	1085.82		0.859116	1.00002		4.69613	0.0151		0.28258	2.8e-05	1.46722	4.6e-05	1.88675	0.000106	0.039426	0.002786	0.000945	4.9e-05	11.467	30	30
NDZ15	SD02A	72	72	10	1083.8	60.45		0.000558425	2.8851e-05	0.282365	4.42937e-05	0.282354	9.09241	2.94584	1302.16		0.859116	1.00002		4.69613	0.0151		0.282358	1.2e-05	1.46725	3.9e-05	1.88677	8.6e-05	0.02208	0.001	0.00065	1.4e-05	16.0594	27	30
NDZ15	SD02A	73	73	10	711.581	32.5931		0.000575608	4.30501e-05	0.282527	4.63036e-05	0.282519	6.53079	2.38473	1142.22		0.859116	1.00002		4.69613	0.0151		0.28252	1.8e-05	1.46725	5.2e-05	1.88676	9.7e-05	0.025814	0.001047	0.00067	3.9e-05	12.3221	28	30
NDZ15	SD02A	74	74	10	556.757	27.4555		0.000461345	2.81937e-05	0.282555	4.7121e-05	0.28255	4.13656	2.28862	1150.69		0.859116	1.00002		4.69613	0.0151		0.282548	2e-05	1.46727	3.8e-05	1.88677	0.000114	0.021471	0.000209	0.000537	2.1e-05	15.6845	30	30
NDZ15	SD02A	75	75	10	599.545	31.6637		0.000435572	2.04731e-05	0.282268	4.58878e-05	0.282263	-5.06655	2.33669	1697.79		0.859116	1.00002		4.69613	0.0151		0.282261	1.7e-05	1.46723	3.5e-05	1.88685	6.1e-05	0.020349	0.000594	0.000507	1e-06	14.6838	30	30
NDZ15	SD02A	76	76	10	718.546	36.914		0.00320107	0.000260053	0.282644	4.80161e-05	0.282601	9.57153	2.58633	977.402		0.859116	1.00002		4.69613	0.0151		0.282637	2.2e-05	1.46724	3.4e-05	1.88672	0.000105	0.148815	0.015736	0.003726	0.000247	9.45767	27	30
NDZ15	SD02A	77	77	10	772.33	39.6681		0.00159624	9.29645e-05	0.282609	4.5575e-05	0.282586	10.2581	2.51949	982.734		0.859116	1.00002		4.69613	0.0151		0.282602	1.6e-05	1.46732	4.9e-05	1.88677	8.1e-05	0.074626	0.004222	0.001858	6.4e-05	12.8556	27	30
NDZ15	SD02A	78	78	10	782.11	41.0547		0.00110225	7.30513e-05	0.282553	4.49038e-05	0.282537	8.74268	2.52907	1075.71		0.859116	1.00002		4.69613	0.0151		0.282546	1.4e-05	1.46728	4.1e-05	1.8867	7.5e-05	0.053058	0.003731	0.001283	6e-05	16.1882	27	30
NDZ15	SD02A	79	79	10	986.965	49.3505		0.000429558	2.01909e-05	0.282412	4.45818e-05	0.282404	8.67924	2.70092	1246.23		0.859116	1.00002		4.69613	0.0151		0.282405	1.3e-05	1.46726	4.7e-05	1.88677	0.000102	0.018625	0.00031	0.0005	1e-06	18.7639	28	30
NDZ15	SD02A	80	80	10	748.996	38.6956		0.000338492	1.61036e-05	0.28255	4.59273e-05	0.282545	8.29425	2.50112	1073.87		0.859116	1.00002		4.69613	0.0151		0.282543	1.7e-05	1.46729	3.1e-05	1.88675	5.3e-05	0.016335	0.000512	0.000394	3e-06	16.6257	29	30
Sample SD03A - Blue Nile, Wad Madani, Sudan (modern river sand)
NDZ09	SD03A	1	1,26	8	767.974	23.1264		0.00105437	8.24298e-05	0.282509	4.00208e-05	0.282494	6.90013	1.96756	1167.38		1.08362	1.00007		4.52962	0.0113358		0.282488	2.4e-05	1.46726	5.2e-05	1.88684	0.000124	0.039429	0.001501	0.000973	6.2e-05	9.23855	27	30
NDZ09	SD03A	2	2,27	8	530.475	19		0.00127001	7.54131e-05	0.282468	4.45694e-05	0.282455	0.18865	2.01644	1350.11		1.08362	1.00007		4.52962	0.0113358		0.282447	3.1e-05	1.46723	0.000101	1.88678	0.000143	0.047654	0.001584	0.001172	4.5e-05	7.88894	27	30
NDZ09	SD03A	3	3,28	8	711.671	24		0.000245983	1.71241e-05	0.282517	4.67099e-05	0.282514	6.33562	2.2007	1153.22		1.08362	1.00007		4.52962	0.0113358		0.282496	3.4e-05	1.46726	7.7e-05	1.88687	0.000181	0.008497	0.000261	0.000227	1.2e-05	9.07068	28	30
NDZ09	SD03A	4	4,29	8	803.238	26		0.000458373	2.12102e-05	0.282534	3.94315e-05	0.282527	8.87749	1.98891	1085.37		1.08362	1.00007		4.52962	0.0113358		0.282513	2.3e-05	1.46724	9.2e-05	1.88683	0.000147	0.015971	0.00067	0.000423	4e-06	9.23539	27	30
NDZ09	SD03A	5	5,30	8	806.978	26		0.00113997	5.29943e-05	0.28247	3.88506e-05	0.282453	6.32632	1.97405	1231.16		1.08362	1.00007		4.52962	0.0113358		0.282449	2.2e-05	1.46728	9.5e-05	1.88693	0.000128	0.041496	0.001144	0.001052	1.1e-05	10.1697	27	30
NDZ09	SD03A	6	6,31	8	747.146	24		0.00118657	0.000132734	0.28256	4.18935e-05	0.282543	8.18515	2.07544	1078.48		1.08362	1.00007		4.52962	0.0113358		0.282539	2.7e-05	1.46734	8.1e-05	1.88691	0.000147	0.035329	0.005203	0.001095	0.000112	7.29596	27	30
NDZ09	SD03A	7	7,32	8	761.073	31		0.000494132	2.44148e-05	0.28253	3.77597e-05	0.282523	7.77749	2.04091	1112.65		1.08362	1.00007		4.52962	0.0113358		0.282509	2e-05	1.46724	9.2e-05	1.88689	0.000177	0.015635	0.000853	0.000456	9e-06	6.48774	27	30
NDZ09	SD03A	8	8,40	8	805.034	25		0.000601411	2.80068e-05	0.282519	3.77586e-05	0.28251	8.30927	1.90869	1118.66		1.08362	1.00007		4.52962	0.0113358		0.282498	2e-05	1.46721	8e-05	1.88686	0.000108	0.020467	0.000461	0.000555	6e-06	10.5487	27	30
NDZ09	SD03A	9	9,36	8	615.607	20		0.000766122	6.43417e-05	0.282602	4.32132e-05	0.282593	6.98295	1.99785	1038.9		1.08362	1.00007		4.52962	0.0113358		0.282581	2.9e-05	1.46727	9.7e-05	1.88689	0.000132	0.027596	0.003408	0.000707	5e-05	10.0563	28	30
NDZ09	SD03A	10	10,37	8	768.063	25		0.000579739	3.08835e-05	0.282566	4.1894e-05	0.282558	9.16458	2.05588	1040.61		1.08362	1.00007		4.52962	0.0113358		0.282545	2.7e-05	1.46726	9.2e-05	1.88681	0.000182	0.020797	0.000313	0.000535	1.5e-05	9.43924	27	30
NDZ09	SD03A	11	11,38	8	804.232	25		0.000999101	4.54625e-05	0.282477	4.18863e-05	0.282462	6.58996	2.05777	1214.2		1.08362	1.00007		4.52962	0.0113358		0.282456	2.7e-05	1.46723	8.8e-05	1.88679	0.000145	0.035689	0.001055	0.000922	4e-06	9.9367	27	30
NDZ09	SD03A	12	12,35	8	643.826	20		0.00189201	8.62538e-05	0.282602	4.06368e-05	0.282579	7.1213	1.90278	1054.07		1.08362	1.00007		4.52962	0.0113358		0.282581	2.5e-05	1.46722	7.8e-05	1.88696	0.000174	0.071777	0.002621	0.001746	9e-06	10.488	27	30
NDZ09	SD03A	13	13,34	8	813.052	28		0.000781293	3.5654e-05	0.282507	3.67371e-05	0.282495	7.96458	1.9404	1144.49		1.08362	1.00007		4.52962	0.0113358		0.282486	1.8e-05	1.46728	6.9e-05	1.88694	0.000106	0.028192	0.001097	0.000721	4e-06	11.033	27	30
NDZ09	SD03A	14	14,39	8	743.506	26		0.000733613	3.40846e-05	0.282519	3.72385e-05	0.282509	6.87807	1.91115	1148.72		1.08362	1.00007		4.52962	0.0113358		0.282498	1.9e-05	1.46725	6.2e-05	1.88691	0.000117	0.025732	0.001175	0.000677	7e-06	8.52729	27	30
NDZ09	SD03A	15	15,33	8	871.019	36.914		0.000961174	6.37706e-05	0.282376	3.77449e-05	0.28236	4.49956	2.18829	1385.06		1.08362	1.00007		4.52962	0.0113358		0.282355	2e-05	1.46719	8.4e-05	1.88688	0.000101	0.034732	0.001076	0.000887	4.3e-05	12.3663	27	30
NDZ09	SD03A	16	16,43	8	775.8	27.3751		0.00067293	3.0959e-05	0.282479	3.77548e-05	0.282469	6.20607	1.96051	1212.55		1.08362	1.00007		4.52962	0.0113358		0.282458	2e-05	1.46718	7.1e-05	1.88691	0.000119	0.02251	0.00043	0.000621	5e-06	11.7999	27	30
NDZ09	SD03A	17	17,41	8	893.425	32.3217		0.00108254	9.67806e-05	0.282483	4.00185e-05	0.282465	8.71161	2.18703	1168.17		1.08362	1.00007		4.52962	0.0113358		0.282462	2.4e-05	1.46726	8.7e-05	1.88695	0.000167	0.040825	0.001808	0.000999	7.7e-05	11.5086	27	30
NDZ09	SD03A	18	18,42	8	606.497	21.7574		0.00110638	5.50393e-05	0.282455	4.00159e-05	0.282442	1.43929	1.91376	1341.65		1.08362	1.00007		4.52962	0.0113358		0.282434	2.4e-05	1.46724	8e-05	1.88673	0.000144	0.043603	0.001053	0.001021	2.1e-05	10.0723	27	30
NDZ09	SD03A	19	19,49	8	870.282	29.9014		0.000512554	2.34432e-05	0.282481	4.25382e-05	0.282473	8.46474	2.18848	1163.12		1.08362	1.00007		4.52962	0.0113358		0.28246	2.8e-05	1.46723	0.000111	1.88684	0.000122	0.017621	0.000415	0.000473	3e-06	10.715	27	30
NDZ09	SD03A	20	20,50	8	645.866	25.3313		0.000625251	2.96185e-05	0.282598	4.25482e-05	0.28259	7.56812	2.0806	1030.67		1.08362	1.00007		4.52962	0.0113358		0.282577	2.8e-05	1.46724	5.1e-05	1.88681	0.000146	0.02352	0.000536	0.000577	8e-06	9.58009	28	30
NDZ09	SD03A	21	21,51	8	850.374	33.8489		0.00061008	5.98582e-05	0.282486	4.25386e-05	0.282476	8.14265	2.29524	1164.92		1.08362	1.00007		4.52962	0.0113358		0.282465	2.8e-05	1.46722	8.4e-05	1.88689	0.000131	0.020878	0.001522	0.000563	4.9e-05	10.0455	28	30
NDZ09	SD03A	22	22,52	8	505.844	21.6285		0.00061008	3.2623e-05	0.282416	4.1881e-05	0.28241	-1.9627	1.9711	1450.2		1.08362	1.00007		4.52962	0.0113358		0.282395	2.7e-05	1.46724	9.6e-05	1.88694	0.000151	0.023185	0.000299	0.000563	1.6e-05	8.50512	27	30
NDZ09	SD03A	23	23,48	8	745.371	25.8875		0.00175439	0.000101317	0.282555	4.45764e-05	0.28253	7.68705	2.18555	1104.94		1.08362	1.00007		4.52962	0.0113358		0.282534	3.1e-05	1.46721	0.000101	1.88704	0.000179	0.058052	0.003569	0.001619	5.8e-05	7.46739	27	30
NDZ09	SD03A	24	24,47	8	870.063	32.5054		0.00063392	2.92208e-05	0.282525	4.06299e-05	0.282515	9.94842	2.17996	1079.88		1.08362	1.00007		4.52962	0.0113358		0.282504	2.5e-05	1.46729	0.000105	1.88696	0.000172	0.02092	0.000574	0.000585	5e-06	9.69651	28	30
NDZ09	SD03A	25	25,46	8	814.357	27.379		0.000763955	3.59523e-05	0.282488	4.38812e-05	0.282476	7.32967	2.18026	1181.07		1.08362	1.00007		4.52962	0.0113358		0.282467	3e-05	1.46727	0.000108	1.8871	0.000183	0.022824	0.000562	0.000705	9e-06	9.04865	27	30
NDZ09	SD03A	53	53	8	824.034	30.4994		0.0010056	4.83632e-05	0.282535	4.59884e-05	0.282519	9.07589	2.32668	1091.21		1.08362	1.00007		4.52962	0.0113358		0.282514	3.3e-05	1.4673	8.4e-05	1.88677	0.000208	0.03626	0.00085	0.000928	1.5e-05	9.40071	27	30
NDZ09	SD03A	54	54	8	844.104	29.2134		0.00154416	7.32254e-05	0.282448	4.45677e-05	0.282423	6.13035	2.25276	1272.27		1.08362	1.00007		4.52962	0.0113358		0.282427	3.1e-05	1.4672	9.2e-05	1.88702	0.000162	0.05548	0.000654	0.001425	2e-05	9.90039	28	30
NDZ09	SD03A	55	55	8	818.471	28.0645		0.00110746	0.000185702	0.282499	4.18882e-05	0.282482	7.62264	2.20319	1168.03		1.08362	1.00007		4.52962	0.0113358		0.282478	2.7e-05	1.46726	0.000104	1.88692	0.000151	0.03492	0.006008	0.001022	0.000165	10.333	27	30
NDZ09	SD03A	56	56	8	848.01	30.7908		0.000954672	4.35811e-05	0.282449	4.25354e-05	0.282434	6.58394	2.21003	1250.12		1.08362	1.00007		4.52962	0.0113358		0.282428	2.8e-05	1.46722	7.3e-05	1.88684	0.000113	0.034403	0.000563	0.000881	5e-06	9.66686	27	30
NDZ09	SD03A	58	58	8	695.56	25.5185		0.000441035	2.024e-05	0.282561	4.32098e-05	0.282555	7.44283	2.10857	1078.11		1.08362	1.00007		4.52962	0.0113358		0.28254	2.9e-05	1.46723	0.000108	1.88698	0.000155	0.013766	0.000401	0.000407	3e-06	9.77912	27	30
NDZ09	SD03A	59	59	8	817.615	28.7846		0.000554815	7.37649e-05	0.282493	4.52727e-05	0.282484	7.69298	2.28627	1163.4		1.08362	1.00007		4.52962	0.0113358		0.282472	3.2e-05	1.46724	0.000109	1.88694	0.000159	0.019659	0.003215	0.000512	6.4e-05	10.7135	27	30
NDZ09	SD03A	60	60	8	846.8	35.5879		0.00028716	1.37105e-05	0.28247	4.1248e-05	0.282465	7.6789	2.26855	1187.94		1.08362	1.00007		4.52962	0.0113358		0.282449	2.6e-05	1.46724	0.000107	1.88691	0.000164	0.008839	0.000273	0.000265	4e-06	7.72086	27	30
NDZ09	SD03A	61	61	8	749.361	27.02		0.00180098	0.000108489	0.282515	4.00214e-05	0.28249	6.33219	2.05166	1184.02		1.08362	1.00007		4.52962	0.0113358		0.282494	2.4e-05	1.46727	8.2e-05	1.88673	0.000134	0.057375	0.001684	0.001662	6.6e-05	7.46457	29	30
NDZ09	SD03A	62	62	8	817.309	31.6843		0.00201879	9.47791e-05	0.282495	4.25394e-05	0.282464	6.95826	2.23477	1204.24		1.08362	1.00007		4.52962	0.0113358		0.282474	2.8e-05	1.46725	9.4e-05	1.88684	0.000134	0.060978	0.001007	0.001863	2.3e-05	8.32799	27	30
NDZ09	SD03A	63	63	8	788.024	29.139		0.000709774	0.000107848	0.282238	3.49234e-05	0.282227	-2.08064	1.94047	1683.61		1.08362	1.00007		4.52962	0.0113358		0.282217	1.4e-05	1.46724	7.6e-05	1.887	0.00013	0.02636	0.003652	0.000655	9.5e-05	12.2963	27	30
NDZ09	SD03A	64	64	8	808.662	27.3834		0.00138812	7.28758e-05	0.282498	4.18881e-05	0.282477	7.22117	2.11862	1182.51		1.08362	1.00007		4.52962	0.0113358		0.282477	2.7e-05	1.46724	8.3e-05	1.88691	0.000123	0.049935	0.002213	0.001281	3.4e-05	9.2243	27	30
NDZ09	SD03A	65	65	8	771.71	26.7765		0.00242407	0.000180322	0.28255	4.00246e-05	0.282515	7.72912	2.07567	1124.02		1.08362	1.00007		4.52962	0.0113358		0.282529	2.4e-05	1.46719	0.000101	1.88698	0.000214	0.092482	0.006851	0.002237	0.000132	8.85371	27	30
NDZ09	SD03A	66	66	8	586.371	19.8044		0.00112805	9.96959e-05	0.282213	4.12254e-05	0.282201	-7.57671	1.93033	1826.2		1.08362	1.00007		4.52962	0.0113358		0.282192	2.6e-05	1.46714	9.7e-05	1.88692	0.000162	0.041198	0.002365	0.001041	7.9e-05	11.6133	27	30
NDZ09	SD03A	67	67	8	812.715	29.531		0.000762871	3.4623e-05	0.282508	4.25405e-05	0.282496	8.00256	2.17967	1142.09		1.08362	1.00007		4.52962	0.0113358		0.282487	2.8e-05	1.46717	9.8e-05	1.88687	0.00016	0.026783	0.000872	0.000704	2e-06	9.62373	27	30
NDZ09	SD03A	68	68	8	1963.9	24.4824		0.000486547	4.57519e-05	0.281445	4.05335e-05	0.281427	-3.6002	2.06001	2713.87		1.08362	1.00007		4.52962	0.0113358		0.281424	2.5e-05	1.46726	8.5e-05	1.88696	0.000149	0.016621	0.000831	0.000449	3.7e-05	12.095	27	30
NDZ09	SD03A	69	69	8	841.484	29.8995		0.0011974	5.45078e-05	0.282509	4.00208e-05	0.28249	8.42998	2.10258	1141.6		1.08362	1.00007		4.52962	0.0113358		0.282488	2.4e-05	1.46724	9.7e-05	1.88683	0.000108	0.040979	0.00087	0.001105	5e-06	8.56335	30	30
NDZ09	SD03A	70	70	8	848.264	31.2702		0.000917829	4.17011e-05	0.282474	4.12484e-05	0.282459	7.49622	2.17474	1199.35		1.08362	1.00007		4.52962	0.0113358		0.282453	2.6e-05	1.46719	9e-05	1.88695	0.000173	0.031819	0.000764	0.000847	3e-06	9.28713	28	30
NDZ09	SD03A	71	71	8	670.66	23.1989		0.000936251	5.41011e-05	0.282621	4.25501e-05	0.282609	8.79232	2.04082	982.13		1.08362	1.00007		4.52962	0.0113358		0.2826	2.8e-05	1.46724	7.6e-05	1.88693	0.000118	0.030069	0.001231	0.000864	3.1e-05	14.8383	27	30
NDZ09	SD03A	73	73	8	829.122	28.6104		0.00272531	0.000124813	0.28253	4.25423e-05	0.282487	8.05843	2.17389	1152.32		1.08362	1.00007		4.52962	0.0113358		0.282509	2.8e-05	1.46724	8.8e-05	1.88684	0.000134	0.077092	0.001674	0.002515	1.7e-05	8.47609	27	30
NDZ09	SD03A	74	74	8	139.001	5.61398		0.00225177	0.000106728	0.282739	4.74598e-05	0.282733	1.26047	1.8058	974.667		1.08362	1.00007		4.52962	0.0113358		0.282718	3.5e-05	1.46721	0.000138	1.88673	0.000171	0.081827	0.004147	0.002078	2.9e-05	7.94872	27	30
NDZ09	SD03A	75	75	8	637.32	21.6513		0.000703272	3.44073e-05	0.282606	3.67469e-05	0.282598	7.62931	1.79431	1020.28		1.08362	1.00007		4.52962	0.0113358		0.282585	1.8e-05	1.46729	4.5e-05	1.88679	0.000102	0.020573	0.000367	0.000649	1.2e-05	16.6978	27	30
NDZ09	SD03A	76	76	8	746.344	28.7936		0.00112914	5.25162e-05	0.282529	3.77596e-05	0.282513	7.09812	1.99343	1138.71		1.08362	1.00007		4.52962	0.0113358		0.282508	2e-05	1.46724	7.1e-05	1.88681	0.00011	0.037316	0.000955	0.001042	1.1e-05	10.6932	28	30
NDZ09	SD03A	77	77	8	770.519	29.8266		0.00312625	0.000177655	0.282515	4.81853e-05	0.28247	6.10321	2.41337	1214.01		1.08362	1.00007		4.52962	0.0113358		0.282494	3.6e-05	1.46726	7.3e-05	1.88683	0.000173	0.110452	0.002149	0.002885	9.9e-05	7.997	27	30
NDZ09	SD03A	83	83	8	964.695	34.1313		0.00175764	8.14803e-05	0.282408	4.06195e-05	0.282376	7.18213	2.22829	1311.64		1.08362	1.00007		4.52962	0.0113358		0.282387	2.5e-05	1.46722	6.4e-05	1.887	0.000115	0.059843	0.000499	0.001622	1.6e-05	9.81913	29	30
NDZ09	SD03A	84	84	8	894.888	31.1744		0.0065841	0.000372524	0.282486	4.52722e-05	0.282375	5.56035	2.40293	1345.32		1.08362	1.00007		4.52962	0.0113358		0.282465	3.2e-05	1.46721	6.1e-05	1.88686	0.000127	0.244881	0.014376	0.006076	0.000206	8.711	30	30
NDZ09	SD03A	85	85	8	846.779	29.7764		0.000955756	4.46277e-05	0.282485	3.8852e-05	0.28247	7.83182	2.05778	1179.37		1.08362	1.00007		4.52962	0.0113358		0.282464	2.2e-05	1.4672	7.7e-05	1.88673	0.000153	0.029094	0.000934	0.000882	1e-05	7.58114	27	30
NDZ09	SD03A	86	86	8	755.319	27.0626		0.0016276	7.59908e-05	0.282521	4.45737e-05	0.282498	6.75946	2.20057	1164.96		1.08362	1.00007		4.52962	0.0113358		0.2825	3.1e-05	1.46719	7.3e-05	1.88678	0.000197	0.059037	0.001388	0.001502	1.7e-05	6.38502	27	30
NDZ09	SD03A	87	87	8	771.095	29.1842		0.00128843	6.84452e-05	0.282524	3.94306e-05	0.282505	7.3794	2.06786	1143.1		1.08362	1.00007		4.52962	0.0113358		0.282503	2.3e-05	1.46722	7.9e-05	1.88689	0.00015	0.044179	0.00071	0.001189	3.3e-05	8.47431	27	30
NDZ09	SD03A	89	89	8	614.49	22.267		0.000644756	2.92853e-05	0.282492	3.82952e-05	0.282485	3.1125	1.86039	1254.69		1.08362	1.00007		4.52962	0.0113358		0.282471	2.1e-05	1.46718	9.3e-05	1.88689	0.000138	0.021507	0.000619	0.000595	2e-06	12.1963	27	30
NDZ09	SD03A	90	90	8	807.248	28.0825		0.000593826	5.75969e-05	0.282607	4.12601e-05	0.282598	11.4803	2.11824	942.62		1.08362	1.00007		4.52962	0.0113358		0.282586	2.6e-05	1.46725	7e-05	1.88679	0.000118	0.023341	0.001914	0.000548	4.7e-05	10.6355	27	30
NDZ09	SD03A	91	91	8	833.235	29.2781		0.00308074	0.000141389	0.282489	3.82949e-05	0.282441	6.49351	2.0402	1243.16		1.08362	1.00007		4.52962	0.0113358		0.282468	2.1e-05	1.46726	8.9e-05	1.88674	0.00013	0.104915	0.001897	0.002843	2.1e-05	10.4592	27	30
NDZ09	SD03A	92	92	8	812.805	27.2589		0.000779125	3.76108e-05	0.282521	3.77588e-05	0.282509	8.45632	1.96135	1116.76		1.08362	1.00007		4.52962	0.0113358		0.2825	2e-05	1.46733	6.5e-05	1.88685	0.000102	0.025619	0.001022	0.000719	1.2e-05	15.7805	27	30
NDZ09	SD03A	93	93	8	807.943	28.1916		0.000713024	3.24605e-05	0.282483	4.25383e-05	0.282472	7.03823	2.14942	1192.15		1.08362	1.00007		4.52962	0.0113358		0.282462	2.8e-05	1.46721	9.5e-05	1.88693	0.000136	0.023873	0.000424	0.000658	3e-06	13.5259	27	30
NDZ09	SD03A	94	94	8	724.714	25.9084		0.00159509	0.000107135	0.282525	3.88558e-05	0.282503	6.25924	1.98724	1168.08		1.08362	1.00007		4.52962	0.0113358		0.282504	2.2e-05	1.46717	8.6e-05	1.88698	0.00013	0.056693	0.001131	0.001472	7.3e-05	12.3402	27	30
NDZ09	SD03A	95	95	8	795.026	29.5556		0.00138487	6.28135e-05	0.282505	3.88539e-05	0.282484	7.17531	2.05199	1173.98		1.08362	1.00007		4.52962	0.0113358		0.282484	2.2e-05	1.46722	5.8e-05	1.88692	0.000104	0.049265	0.001125	0.001278	3e-06	10.9766	29	30
NDZ09	SD03A	99	99	8	810.706	27.7902		0.000435617	2.11395e-05	0.28256	4.12559e-05	0.282553	9.97758	2.09422	1029.8		1.08362	1.00007		4.52962	0.0113358		0.282539	2.6e-05	1.46719	7.8e-05	1.88683	0.000158	0.012077	0.000196	0.000402	7e-06	9.62015	27	30
NDZ09	SD03A	101	101	8	617.381	22.9287		0.000677265	3.0754e-05	0.282417	4.18811e-05	0.282409	0.506938	2.0021	1402.41		1.08362	1.00007		4.52962	0.0113358		0.282396	2.7e-05	1.46725	0.000103	1.88715	0.000123	0.022921	0.000731	0.000625	2e-06	8.6054	28	30
NDZ09	SD03A	102	102	8	798.781	29.03		0.000865815	5.45574e-05	0.282504	4.1251e-05	0.282491	7.49799	2.13131	1158.98		1.08362	1.00007		4.52962	0.0113358		0.282483	2.6e-05	1.46724	6.3e-05	1.88691	0.000125	0.026428	0.000995	0.000799	3.5e-05	11.3095	27	30
NDZ09	SD03A	103	103	8	826.347	30.0798		0.00105111	6.36622e-05	0.282525	3.88558e-05	0.282509	8.74725	2.07266	1111.5		1.08362	1.00007		4.52962	0.0113358		0.282504	2.2e-05	1.46728	8.7e-05	1.88687	0.00014	0.031347	0.001829	0.00097	3.9e-05	10.3862	28	30
NDZ09	SD03A	106	?106	8	792.393	34.5684		0.00219325	0.000100667	0.282586	4.52802e-05	0.282553	9.56039	2.39077	1038.25		1.08362	1.00007		4.52962	0.0113358		0.282565	3.2e-05	1.4673	5.7e-05	1.8869	0.000107	0.081956	0.00061	0.002024	1.5e-05	7.3273	27	30
Sample SD04A - Nile Trunk, Dongola, Sudan (modern river sand)
NDZ08	SD04A	1	1	7	849.605	36.2388		0.000811391	6.41473e-05	0.282529	8.90624e-05	0.282516	9.53441	3.99467	1086.38		0.996795	1.00004		5.76923	0.0279841		0.282519	4.1e-05	1.46722	0.000139	1.88703	0.000237	0.027547	0.002254	0.000814	4.4e-05	3.26839	27	30
NDZ08	SD04A	3	3	7	611.048	24.24		0.00038875	2.2975e-05	0.281817	8.84287e-05	0.281813	-20.763	3.67947	2569.68		0.996795	1.00004		5.76923	0.0279841		0.281807	4e-05	1.46721	0.000106	1.88691	0.000219	0.0142	0.000871	0.00039	5e-06	5.12042	27	30
NDZ08	SD04A	4	4	7	852.308	33.2863		0.0013367	7.87493e-05	0.282529	8.86065e-05	0.282508	9.29512	3.91011	1101.98		0.996795	1.00004		5.76923	0.0279841		0.282519	4e-05	1.46715	0.000101	1.88666	0.00016	0.04368	0.001342	0.001341	1.6e-05	5.68534	28	30
NDZ08	SD04A	5	5	7	685.395	28.1386		0.00136362	7.94306e-05	0.28259	9.09881e-05	0.282572	7.82161	3.86971	1048.6		0.996795	1.00004		5.76923	0.0279841		0.28258	4.5e-05	1.4671	0.000104	1.88709	0.000222	0.048087	0.001295	0.001368	1.1e-05	5.23273	27	30
NDZ08	SD04A	6	6	7	904.56	35.79		0.00101075	6.16262e-05	0.282503	9.68817e-05	0.282486	9.70749	4.25913	1121.52		0.996795	1.00004		5.76923	0.0279841		0.282493	5.6e-05	1.46723	0.000114	1.88656	0.000232	0.028971	0.000546	0.001014	2e-05	5.09464	29	30
NDZ08	SD04A	8	8	7	820.989	32.7657		0.00107056	9.92961e-05	0.282477	8.49103e-05	0.28246	6.91806	3.78285	1209.48		0.996795	1.00004		5.76923	0.0279841		0.282467	3.1e-05	1.46723	0.000104	1.88695	0.000198	0.035017	0.003271	0.001074	7.8e-05	6.30195	27	30
NDZ08	SD04A	9	9	7	658.918	28.0928		0.00125297	7.74878e-05	0.282582	8.49377e-05	0.282566	7.01401	3.65363	1072.35		0.996795	1.00004		5.76923	0.0279841		0.282572	3.1e-05	1.46721	0.000103	1.88676	0.000227	0.045491	0.001222	0.001257	2.8e-05	6.01797	27	30
NDZ08	SD04A	10	10	7	807.139	34.195		0.00124799	7.31561e-05	0.282523	8.8158e-05	0.282504	8.14888	3.90943	1129.36		0.996795	1.00004		5.76923	0.0279841		0.282513	3.9e-05	1.46734	0.000126	1.88679	0.000171	0.037263	0.001733	0.001252	1.3e-05	7.92038	27	30
NDZ08	SD04A	12	12	7	840.105	33.9798		0.00219893	0.000133591	0.282453	8.9982e-05	0.282418	5.85344	3.98509	1284.48		0.996795	1.00004		5.76923	0.0279841		0.282443	4.3e-05	1.46731	0.000119	1.88686	0.000178	0.081222	0.001605	0.002206	4.2e-05	3.54028	28	30
NDZ08	SD04A	14	14	7	966.817	67.4624		0.00102869	7.94554e-05	0.282411	0.000112455	0.282392	7.80505	5.5261	1278.61		0.996795	1.00004		5.76923	0.0279841		0.282401	8e-05	1.46719	0.000176	1.88673	0.000446	0.026965	0.001457	0.001032	5.3e-05	1.70257	28	30
NDZ08	SD04A	15	15	7	766.795	30.4255		0.00181815	0.000112216	0.282543	8.38789e-05	0.282517	7.68752	3.68174	1122.35		0.996795	1.00004		5.76923	0.0279841		0.282533	2.8e-05	1.46733	0.000109	1.88672	0.000182	0.060811	0.002074	0.001824	4e-05	5.70188	27	30
NDZ08	SD04A	16	16	7	673.436	27.025		0.00130181	0.000117765	0.28262	9.25159e-05	0.282604	8.65307	3.91784	992.21		0.996795	1.00004		5.76923	0.0279841		0.28261	4.8e-05	1.46733	0.0001	1.88656	0.000348	0.040029	0.003671	0.001306	9.1e-05	3.07254	27	30
NDZ08	SD04A	17	17	7	633.593	27.3444		0.000300035	3.71706e-05	0.282597	8.56918e-05	0.282593	7.39794	3.66196	1030.23		0.996795	1.00004		5.76923	0.0279841		0.282587	3.3e-05	1.46733	8.7e-05	1.88676	0.000227	0.010136	0.001464	0.000301	3.3e-05	5.87534	27	30
NDZ08	SD04A	18	18	7	745.47	27.919		0.00210822	0.000211839	0.28258	8.73061e-05	0.28255	8.39824	3.79331	1065.17		0.996795	1.00004		5.76923	0.0279841		0.28257	3.7e-05	1.46718	0.000111	1.88689	0.000262	0.069509	0.007139	0.002115	0.000174	4.48343	29	30
NDZ08	SD04A	20	20	7	630.699	23.9994		0.000411676	3.51534e-05	0.282564	8.32382e-05	0.282559	6.11776	3.49735	1099.67		0.996795	1.00004		5.76923	0.0279841		0.282554	2.6e-05	1.46729	0.000121	1.88681	0.00017	0.014498	0.001364	0.000413	2.6e-05	7.49545	27	30
NDZ08	SD04A	21	21	7	605.026	24.0684		0.000845282	6.83184e-05	0.282561	8.49322e-05	0.282551	5.2657	3.56468	1126.57		0.996795	1.00004		5.76923	0.0279841		0.282551	3.1e-05	1.4673	0.000129	1.88678	0.000183	0.032228	0.001515	0.000848	4.8e-05	5.84069	30	30
NDZ08	SD04A	22	22	7	860.706	32.1901		0.00318077	0.000246425	0.282519	9.14697e-05	0.282467	8.06327	4.04824	1177.77		0.996795	1.00004		5.76923	0.0279841		0.282509	4.6e-05	1.4673	9.7e-05	1.88682	0.000281	0.092187	0.004402	0.003191	0.000165	4.22087	27	30
NDZ08	SD04A	25	25	7	699.405	28.1723		0.000543253	3.94285e-05	0.282631	8.3256e-05	0.282624	9.95958	3.59384	939.992		0.996795	1.00004		5.76923	0.0279841		0.282621	2.6e-05	1.46727	6.7e-05	1.88679	0.000167	0.020041	0.000765	0.000545	2.4e-05	5.0911	27	30
NDZ08	SD04A	27	27	7	685.812	28.0926		0.00148323	0.000108548	0.282076	8.34267e-05	0.282057	-10.429	3.61137	2062.8		0.996795	1.00004		5.76923	0.0279841		0.282066	2.7e-05	1.46731	6.4e-05	1.88679	0.000194	0.054675	0.002092	0.001488	6.7e-05	8.35879	27	30
NDZ08	SD04A	28	28	7	759.64	32.7276		0.00138953	8.9094e-05	0.282551	8.56799e-05	0.282531	8.03522	3.7915	1097.05		0.996795	1.00004		5.76923	0.0279841		0.282541	3.3e-05	1.4672	9.2e-05	1.8869	0.000165	0.040224	0.000942	0.001394	3.9e-05	8.21758	30	30
NDZ08	SD04A	29	29	7	732.603	28.1736		0.000860234	8.32063e-05	0.28221	8.28368e-05	0.282198	-4.37046	3.59586	1765.89		0.996795	1.00004		5.76923	0.0279841		0.2822	2.5e-05	1.46716	8.4e-05	1.88682	0.000119	0.02841	0.003217	0.000863	6.7e-05	9.04077	27	30
NDZ08	SD04A	30	30	7	792.486	30.1252		0.00157494	9.3023e-05	0.282487	8.64536e-05	0.282463	6.38155	3.76326	1216.3		0.996795	1.00004		5.76923	0.0279841		0.282477	3.5e-05	1.46714	8.5e-05	1.88682	0.00018	0.056864	0.001844	0.00158	2e-05	5.66909	29	30
NDZ08	SD04A	34	34	7	673.054	26.0144		0.00125496	9.78271e-05	0.282579	8.8619e-05	0.282563	7.2137	3.74921	1072.65		0.996795	1.00004		5.76923	0.0279841		0.282569	4e-05	1.46732	9e-05	1.88684	0.000174	0.041373	0.002904	0.001259	6.6e-05	4.09408	27	30
NDZ08	SD04A	37	37	7	919.447	35.5877		0.000824349	5.1568e-05	0.282436	9.24719e-05	0.282422	7.77511	4.09726	1241.71		0.996795	1.00004		5.76923	0.0279841		0.282426	4.8e-05	1.46723	8.4e-05	1.88692	0.000199	0.032255	0.00056	0.000827	2e-05	4.22902	27	30
NDZ08	SD04A	38	38	7	687.755	28.8493		0.00077451	5.79382e-05	0.282078	8.67591e-05	0.282068	-9.99139	3.73551	2040.26		0.996795	1.00004		5.76923	0.0279841		0.282068	3.6e-05	1.46724	9.1e-05	1.88685	0.000212	0.027897	0.00282	0.000777	3.7e-05	5.29684	29	30
NDZ08	SD04A	46	46	7	806.964	31.9452		0.000684798	7.58868e-05	0.282521	8.72911e-05	0.282511	8.37758	3.8432	1116.41		0.996795	1.00004		5.76923	0.0279841		0.282511	3.7e-05	1.46717	8.8e-05	1.8866	0.000247	0.023982	0.002617	0.000687	6.5e-05	4.49428	28	30
NDZ08	SD04A	48	48	7	696.262	26.8419		0.00114033	6.6867e-05	0.282582	8.38892e-05	0.282567	7.87713	3.58887	1054.33		0.996795	1.00004		5.76923	0.0279841		0.282572	2.8e-05	1.46726	9.8e-05	1.88667	0.000136	0.038269	0.001476	0.001144	1.2e-05	9.22262	29	30
NDZ08	SD04A	49	49	7	723.051	28.7493		0.0016158	0.000172828	0.28261	0.000101739	0.282588	9.22378	4.30864	1000.6		0.996795	1.00004		5.76923	0.0279841		0.2826	6.4e-05	1.46743	0.000113	1.88661	0.000317	0.05063	0.0054	0.001621	0.000146	2.52684	18	20
NDZ08	SD04A	50	50	7	848.55	33.7157		0.00206038	0.000127767	0.282616	0.000415609	0.282583	11.8858	15.5184	953.618		0.996795	1.00004		5.76923	0.0279841		0.282606	0.000408	1.46835	0.0024	1.88614	0.002215	0.062611	0.001509	0.002067	4.7e-05	13.3688	4	4
NDZ08	SD04A	51	51	7	847.233	31.6393		0.00137558	0.000237906	0.282459	8.45456e-05	0.282437	6.68262	3.82234	1243.97		0.996795	1.00004		5.76923	0.0279841		0.282449	3e-05	1.46736	9.3e-05	1.88666	0.000142	0.045563	0.008281	0.00138	0.000225	13.5798	27	30
NDZ08	SD04A	53	53	7	1993.08	23.1682		0.00059708	4.19393e-05	0.281309	9.11772e-05	0.281286	-7.91374	3.82322	2970.59		0.996795	1.00004		5.76923	0.0279841		0.281299	4.6e-05	1.46733	0.000155	1.88672	0.000308	0.016355	0.000354	0.000599	2.4e-05	9.239	16	17
NDZ14	SD04A	1	1	11	568.068	30.2665		0.00164357	0.000138911	0.282463	4.33712e-05	0.282445	0.683169	2.23864	1352.83		1.00647	1.00005		5.82524	0.0074		0.282448	3.8e-05	1.46727	7.1e-05	1.88688	0.0002	0.056576	0.001819	0.001633	0.0001	6.75142	20	23
NDZ14	SD04A	2	2	11	695.413	35.4551		0.000868586	8.83821e-05	0.282608	3.18342e-05	0.282597	8.90576	1.95036	995.926		1.00647	1.00005		5.82524	0.0074		0.282593	2.4e-05	1.46727	8.7e-05	1.88685	0.000138	0.030058	0.003622	0.000863	7.2e-05	6.21246	27	30
NDZ14	SD04A	3	3	11	916.521	45.8437		0.00132552	0.000258393	0.282082	4.60098e-05	0.282059	-5.14118	2.79421	1955.93		1.00647	1.00005		5.82524	0.0074		0.282067	4.1e-05	1.46719	0.000104	1.88681	0.000171	0.051026	0.007752	0.001317	0.000245	8.13444	23	23
NDZ14	SD04A	4	4	11	843.006	43.0609		0.00152783	0.000111056	0.282462	3.10799e-05	0.282438	6.61165	2.09763	1244.5		1.00647	1.00005		5.82524	0.0074		0.282447	2.3e-05	1.46733	6.2e-05	1.88681	0.000164	0.050047	0.001003	0.001518	6.6e-05	5.74704	27	30
NDZ14	SD04A	5	5	11	637.684	32.8749		0.000286845	7.43675e-05	0.282618	3.90704e-05	0.282615	8.23889	2.15177	986.358		1.00647	1.00005		5.82524	0.0074		0.282603	3.3e-05	1.46725	6e-05	1.88685	0.000128	0.009452	0.003126	0.000285	7.2e-05	7.63697	29	30
NDZ14	SD04A	6	6	11	548.181	28.1965		0.00106485	0.00012428	0.282322	4.07627e-05	0.282311	-4.52341	2.10458	1626.52		1.00647	1.00005		5.82524	0.0074		0.282307	3.5e-05	1.46715	6.7e-05	1.88683	0.000141	0.039301	0.003363	0.001058	0.000107	7.25936	29	30
NDZ14	SD04A	7	7	11	785.76	40.7777		0.00106787	9.70396e-05	0.282583	3.33669e-05	0.282567	9.90371	2.12881	1013.58		1.00647	1.00005		5.82524	0.0074		0.282568	2.6e-05	1.46721	5.6e-05	1.88658	0.000108	0.037595	0.003904	0.001061	7.4e-05	7.41708	27	30
NDZ14	SD04A	8	8	11	32.4817	2.7921		0.00137685	9.01981e-05	0.282794	4.51453e-05	0.282793	1.01187	1.65823	902.868		1.00647	1.00005		5.82524	0.0074		0.282779	4e-05	1.4674	0.000186	1.88704	0.000238	0.050701	0.003986	0.001368	4.1e-05	5.43637	13	13
NDZ14	SD04A	9	9	11	659.906	34.5131		0.00252021	0.00016554	0.282707	3.65753e-05	0.282676	10.9055	2.09237	854.55		1.00647	1.00005		5.82524	0.0074		0.282692	3e-05	1.46724	6.6e-05	1.88668	0.000127	0.087987	0.002488	0.002504	7.6e-05	6.17208	28	30
NDZ14	SD04A	10	10	11	25.1187	1.35884		0.00117153	9.80866e-05	0.283079	3.26172e-05	0.283078	10.9377	1.1844	334.923		1.00647	1.00005		5.82524	0.0074		0.283064	2.5e-05	1.46718	6.9e-05	1.88685	0.000213	0.043952	0.002531	0.001164	7e-05	7.75456	18	19
NDZ14	SD04A	12	12	11	838.648	42.2661		0.0011977	0.000127474	0.282547	3.33652e-05	0.282528	9.71402	2.1803	1067.37		1.00647	1.00005		5.82524	0.0074		0.282532	2.6e-05	1.46716	5.8e-05	1.88687	0.000102	0.040809	0.003933	0.00119	0.000106	8.29626	30	30
NDZ14	SD04A	13	13	11	595.2	32.4096		0.000941052	0.000147449	0.282201	3.10669e-05	0.28219	-7.73578	1.87021	1842.04		1.00647	1.00005		5.82524	0.0074		0.282186	2.3e-05	1.46732	6.9e-05	1.8867	0.000163	0.036053	0.007153	0.000935	0.000136	7.37119	27	30
NDZ14	SD04A	14	14	11	822.996	41.8589		0.00229174	0.000198532	0.282511	3.99146e-05	0.282475	7.49583	2.41174	1178.81		1.00647	1.00005		5.82524	0.0074		0.282496	3.4e-05	1.46719	8.8e-05	1.88688	0.000147	0.085222	0.004414	0.002277	0.000146	7.87795	30	30
NDZ14	SD04A	15	15	11	823.232	41.8864		0.00122085	0.000242167	0.282562	3.4947e-05	0.282543	9.8963	2.29199	1044.58		1.00647	1.00005		5.82524	0.0074		0.282547	2.8e-05	1.4672	9.1e-05	1.88694	0.00013	0.048325	0.011197	0.001213	0.00023	7.29948	28	30
NDZ14	SD04A	17	17	11	312.435	16.723		0.00125809	9.49616e-05	0.28277	2.96463e-05	0.282763	6.17663	1.43019	838.123		1.00647	1.00005		5.82524	0.0074		0.282755	2.1e-05	1.46722	6.1e-05	1.88675	0.000109	0.053945	0.002668	0.00125	6e-05	9.62862	27	30
NDZ14	SD04A	18	18	11	818.187	43.0888		0.000936019	9.89158e-05	0.282545	3.82265e-05	0.282531	9.33958	2.35949	1071.67		1.00647	1.00005		5.82524	0.0074		0.28253	3.2e-05	1.46721	7.9e-05	1.88685	0.000124	0.029232	0.002092	0.00093	8.2e-05	6.67802	29	30
NDZ14	SD04A	19	19	11	610.054	31.7399		0.000463984	7.64002e-05	0.282263	2.82369e-05	0.282258	-5.02175	1.73696	1703.73		1.00647	1.00005		5.82524	0.0074		0.282248	1.9e-05	1.4673	8.3e-05	1.88673	0.000146	0.019385	0.002102	0.000461	7.1e-05	8.58431	27	30
NDZ14	SD04A	20	20	11	822.647	42.2943		0.00162847	0.000262326	0.282577	3.18327e-05	0.282552	10.1911	2.19058	1027.57		1.00647	1.00005		5.82524	0.0074		0.282562	2.4e-05	1.46722	6.9e-05	1.88692	0.000141	0.054591	0.010799	0.001618	0.000243	7.56413	30	30
NDZ14	SD04A	21	21	11	613.857	32.5234		0.000460964	3.89259e-05	0.282244	3.25775e-05	0.282239	-5.60899	1.89226	1739.3		1.00647	1.00005		5.82524	0.0074		0.282229	2.5e-05	1.4673	8.2e-05	1.8869	0.000104	0.016351	0.000644	0.000458	2.8e-05	9.3011	27	30
NDZ14	SD04A	22	22	11	827.444	41.6349		0.00248901	0.000248894	0.282565	4.16336e-05	0.282526	9.39384	2.49247	1076.18		1.00647	1.00005		5.82524	0.0074		0.28255	3.6e-05	1.46726	9.7e-05	1.88668	0.000177	0.072276	0.010648	0.002473	0.000201	6.07492	30	30
NDZ14	SD04A	23	23	11	817.801	41.189		0.00104975	0.000111807	0.282505	3.1082e-05	0.282489	7.85181	2.06847	1154.67		1.00647	1.00005		5.82524	0.0074		0.28249	2.3e-05	1.46728	7.7e-05	1.88694	0.0001	0.038191	0.003108	0.001043	9.3e-05	10.6326	28	30
NDZ14	SD04A	24	24	11	682.936	34.8932		0.00152179	9.6152e-05	0.282603	3.65709e-05	0.282583	8.1571	2.09313	1027.78		1.00647	1.00005		5.82524	0.0074		0.282588	3e-05	1.4673	6.2e-05	1.88647	0.000148	0.047558	0.002408	0.001512	3.7e-05	7.517	27	29
NDZ14	SD04A	26	26	11	627.011	34.7138		0.000763913	6.56822e-05	0.282609	3.65712e-05	0.2826	7.48246	2.08875	1020.14		1.00647	1.00005		5.82524	0.0074		0.282594	3e-05	1.46727	7.3e-05	1.88667	0.000148	0.028784	0.001385	0.000759	4.8e-05	7.11904	22	25
NDZ14	SD04A	27	27	11	615.429	32.2511		0.000476061	3.02476e-05	0.282302	3.03391e-05	0.282296	-3.52635	1.80308	1625.12		1.00647	1.00005		5.82524	0.0074		0.282287	2.2e-05	1.46726	6.9e-05	1.88668	0.000103	0.018489	0.000406	0.000473	1.2e-05	8.03718	27	30
NDZ14	SD04A	29	29	11	615.297	33.9433		0.000477068	3.07164e-05	0.282135	3.49281e-05	0.282129	-9.44368	2.00292	1952.36		1.00647	1.00005		5.82524	0.0074		0.28212	2.8e-05	1.46727	6e-05	1.88685	0.000111	0.018934	0.000403	0.000474	1.3e-05	8.54284	30	30
NDZ14	SD04A	30	30	11	816.619	41.9406		0.000754854	6.83569e-05	0.28254	3.33649e-05	0.282528	9.22669	2.14932	1076.71		1.00647	1.00005		5.82524	0.0074		0.282525	2.6e-05	1.46737	7.3e-05	1.88684	0.000222	0.022272	0.002246	0.00075	5.2e-05	7.57774	22	25
NDZ14	SD04A	31	31	11	581.432	30.7197		0.000766932	8.68506e-05	0.282323	3.25813e-05	0.282315	-3.6491	1.86428	1604.65		1.00647	1.00005		5.82524	0.0074		0.282308	2.5e-05	1.46724	8e-05	1.88677	0.000134	0.031692	0.003686	0.000762	7.4e-05	7.31234	28	30
NDZ14	SD04A	34	34	11	662.67	34.1662		0.00106887	0.00012702	0.282568	3.41512e-05	0.282555	6.68116	2.01463	1094.06		1.00647	1.00005		5.82524	0.0074		0.282553	2.7e-05	1.46715	7.5e-05	1.88698	0.000203	0.040355	0.00449	0.001062	0.00011	6.755	27	30
NDZ14	SD04A	35	35	11	649.282	33.494		0.0011655	0.000173835	0.282506	3.9066e-05	0.282492	4.1514	2.19152	1224.79		1.00647	1.00005		5.82524	0.0074		0.282491	3.3e-05	1.46724	7.6e-05	1.88691	9.7e-05	0.044643	0.005857	0.001158	0.000159	8.09618	29	30
NDZ14	SD04A	36	36	11	717.012	38.3529		0.000607909	9.63218e-05	0.282626	5.14455e-05	0.282618	10.1429	2.72152	944.057		1.00647	1.00005		5.82524	0.0074		0.282611	4.7e-05	1.46718	0.000134	1.88657	0.000166	0.018385	0.002446	0.000604	8.9e-05	6.19507	13	13
NDZ14	SD04A	37	37	11	818.735	42.045		0.00244774	0.000253292	0.282501	4.07695e-05	0.282463	6.96646	2.47234	1204.94		1.00647	1.00005		5.82524	0.0074		0.282486	3.5e-05	1.46728	5.1e-05	1.88689	0.000179	0.084425	0.007055	0.002432	0.000208	4.78215	28	30
NDZ14	SD04A	40	40	11	647.89	34.8475		0.00102056	7.72432e-05	0.282406	4.07659e-05	0.282394	0.642104	2.24031	1419.49		1.00647	1.00005		5.82524	0.0074		0.282391	3.5e-05	1.46737	9.3e-05	1.88685	0.000217	0.03277	0.002205	0.001014	4.9e-05	5.4062	21	23
NDZ14	SD04A	41	41	11	641.386	33.0889		0.000688427	5.20707e-05	0.282535	3.03509e-05	0.282527	5.21056	1.82886	1159.14		1.00647	1.00005		5.82524	0.0074		0.28252	2.2e-05	1.46723	7.4e-05	1.88683	0.000149	0.023329	0.001171	0.000684	3.3e-05	7.97256	28	30
NDZ14	SD04A	43	43	11	604.704	31.5887		0.00151776	0.000113051	0.282646	3.25966e-05	0.282629	7.99813	1.88178	973.043		1.00647	1.00005		5.82524	0.0074		0.282631	2.5e-05	1.46723	6.9e-05	1.88683	0.000121	0.055118	0.002277	0.001508	7e-05	11.3514	28	30
NDZ14	SD04A	44	44	11	796.095	40.9975		0.00367564	0.000265513	0.282476	3.49432e-05	0.282421	4.95366	2.21217	1298.98		1.00647	1.00005		5.82524	0.0074		0.282461	2.8e-05	1.46732	9.2e-05	1.88687	0.00016	0.089655	0.00498	0.003652	0.000156	5.07045	23	26
NDZ14	SD04A	45	45	11	590.298	31.6699		0.00034522	2.3458e-05	0.282621	3.25954e-05	0.282617	7.26397	1.86986	1002.56		1.00647	1.00005		5.82524	0.0074		0.282606	2.5e-05	1.46721	5.7e-05	1.88695	0.000124	0.014655	0.000186	0.000343	1.2e-05	10.621	30	30
NDZ14	SD04A	46	46	11	621.969	32.3413		0.000978291	0.000159487	0.28264	6.73342e-05	0.282629	8.38048	3.16182	965.615		1.00647	1.00005		5.82524	0.0074		0.282625	6.4e-05	1.46751	0.000324	1.88677	0.000345	0.038255	0.00489	0.000972	0.000148	6.44969	9	10
NDZ14	SD04A	47	47	11	842.268	43.1381		0.000619987	5.63681e-05	0.282326	2.89227e-05	0.282316	2.28768	2.0164	1484.89		1.00647	1.00005		5.82524	0.0074		0.282311	2e-05	1.46727	5.7e-05	1.88689	0.000148	0.022222	0.001791	0.000616	4.3e-05	10.0445	30	30
NDZ14	SD04A	49	49	11	667.314	34.9378		0.00110007	0.00012792	0.282642	3.33696e-05	0.282628	9.38953	2.00426	945.856		1.00647	1.00005		5.82524	0.0074		0.282627	2.6e-05	1.46726	6.4e-05	1.88677	0.0002	0.037389	0.005621	0.001093	0.00011	7.29456	22	25
NDZ14	SD04A	50	50	11	624.326	33.2339		0.000912871	0.000124638	0.282649	3.992e-05	0.282638	8.77795	2.19711	945.2		1.00647	1.00005		5.82524	0.0074		0.282634	3.4e-05	1.46721	7.1e-05	1.88691	0.000145	0.032621	0.004669	0.000907	0.000112	8.19602	26	27
NDZ14	SD04A	52	52	11	715.094	39.2096		0.00142114	0.000141485	0.28249	3.7391e-05	0.282471	4.89534	2.24343	1236.54		1.00647	1.00005		5.82524	0.0074		0.282475	3.1e-05	1.46724	7.6e-05	1.88694	0.000136	0.045316	0.002642	0.001412	0.000114	7.24656	30	30
NDZ14	SD04A	54	54	11	769.506	40.0499		0.000865566	0.000100172	0.282565	3.41511e-05	0.282552	9.01415	2.14625	1050.22		1.00647	1.00005		5.82524	0.0074		0.28255	2.7e-05	1.46721	6.6e-05	1.88679	0.000129	0.028412	0.003625	0.00086	8.6e-05	7.34091	29	30
NDZ14	SD04A	55	55	11	597.665	32.2917		0.00103667	6.84401e-05	0.282677	3.10906e-05	0.282665	9.136	1.83475	903.353		1.00647	1.00005		5.82524	0.0074		0.282662	2.3e-05	1.4673	0.000142	1.88695	0.000171	0.039954	0.001542	0.00103	3.2e-05	5.85499	21	24
NDZ14	SD04A	56	56	11	995.126	50.234		0.0027064	0.00015965	0.282331	4.33665e-05	0.28228	4.47579	2.69785	1487.05		1.00647	1.00005		5.82524	0.0074		0.282316	3.8e-05	1.46731	0.0001	1.88674	0.000154	0.100879	0.004814	0.002689	2.5e-05	8.32987	22	24
NDZ14	SD04A	57	57	11	764.454	40.3502		0.00327406	0.000282454	0.282639	4.07747e-05	0.282592	10.296	2.4198	974.176		1.00647	1.00005		5.82524	0.0074		0.282624	3.5e-05	1.46729	8.8e-05	1.88669	0.000175	0.099873	0.007355	0.003253	0.000207	5.32254	29	30
NDZ14	SD04A	58	58	11	680.693	34.2445		0.00131445	8.19445e-05	0.28265	6.44894e-05	0.282633	9.86754	3.06589	929.902		1.00647	1.00005		5.82524	0.0074		0.282635	6.1e-05	1.46731	0.000123	1.88694	0.000208	0.045024	0.00311	0.001306	2.9e-05	6.41257	11	12
NDZ14	SD04A	59	59	11	544.814	29.8129		0.00116851	0.000109326	0.282313	3.41397e-05	0.282301	-4.9529	1.89724	1647.66		1.00647	1.00005		5.82524	0.0074		0.282298	2.7e-05	1.46727	7e-05	1.8868	0.000118	0.047007	0.005034	0.001161	8.5e-05	8.22355	27	30
NDZ14	SD04A	60	60	11	626.853	33.0401		0.0014312	0.000123109	0.282552	3.25921e-05	0.282535	5.18176	1.92117	1148.97		1.00647	1.00005		5.82524	0.0074		0.282537	2.5e-05	1.46726	6.9e-05	1.88684	0.000109	0.046908	0.002381	0.001422	9e-05	7.36989	30	30
NDZ14	SD04A	66	66	11	800.529	41.4526		0.000846443	9.96156e-05	0.282518	3.99149e-05	0.282505	8.04259	2.38437	1129.93		1.00647	1.00005		5.82524	0.0074		0.282503	3.4e-05	1.46724	7.7e-05	1.88674	0.00016	0.022605	0.00299	0.000841	8.6e-05	6.85685	28	30
NDZ14	SD04A	68	68	11	667.117	34.0686		0.00112926	0.000129647	0.28257	2.96358e-05	0.282556	6.82223	1.85289	1089.77		1.00647	1.00005		5.82524	0.0074		0.282555	2.1e-05	1.46728	6.4e-05	1.88686	0.000128	0.036357	0.003301	0.001122	0.000111	8.3943	27	30
NDZ14	SD04A	69	69	11	951.063	47.6049		0.00195054	0.000124269	0.281937	2.82191e-05	0.281902	-9.92604	2.09903	2246.51		1.00647	1.00005		5.82524	0.0074		0.281922	1.9e-05	1.46724	8.3e-05	1.88677	0.000126	0.073629	0.002593	0.001938	5e-05	9.18777	27	30
NDZ14	SD04A	70	70	11	740.932	37.1829		0.00206428	0.000357022	0.282618	4.51393e-05	0.282589	9.67022	2.57308	990.117		1.00647	1.00005		5.82524	0.0074		0.282603	4e-05	1.46727	9.7e-05	1.88702	0.00016	0.066649	0.013788	0.002051	0.000334	6.40963	27	30
NDZ14	SD04A	71	71	11	787.044	41.9658		0.00124098	0.000123918	0.282507	3.49446e-05	0.282489	7.14844	2.22066	1168.99		1.00647	1.00005		5.82524	0.0074		0.282492	2.8e-05	1.46726	8.2e-05	1.8868	0.000155	0.04569	0.004603	0.001233	0.0001	6.56557	27	30
NDZ14	SD04A	72	72	11	833.339	44.2405		0.00137685	0.000123265	0.28254	3.10837e-05	0.282518	9.25045	2.13435	1089.02		1.00647	1.00005		5.82524	0.0074		0.282525	2.3e-05	1.46723	9.3e-05	1.88684	0.000103	0.050871	0.002953	0.001368	9.3e-05	8.06163	27	30
NDZ14	SD04A	76	76	11	841.828	44.9646		0.00116046	0.000156283	0.28258	5.14442e-05	0.282562	10.9736	2.89876	999.334		1.00647	1.00005		5.82524	0.0074		0.282565	4.7e-05	1.4672	0.00011	1.88673	0.000236	0.035297	0.005761	0.001153	0.00014	6.00423	22	22
NDZ14	SD04A	77	77	11	32.115	2.05066		0.00199885	0.000201998	0.282809	5.23662e-05	0.282808	1.52135	1.8994	873.872		1.00647	1.00005		5.82524	0.0074		0.282794	4.8e-05	1.46734	7.5e-05	1.88675	0.000199	0.062496	0.004226	0.001986	0.000164	4.24522	27	29
Sample SD06A - River Atbara, Sudan (modern river sand)
NDZ10	SD06A	2	2	16	736.258	24.3294		0.000686	4.8e-05	0.282385	2.1e-05	0.282375	1.99402	1.30626	1415.53		Iolite						0.282372	2.1e-05	1.46744	6.6e-05	1.88648	9.7e-05	0.0228	0.0011	0.000725	5.1e-05	16.9	20.285
NDZ10	SD06A	3	3	16	785.389	27.2569		0.00097	0.00011	0.281805	1.9e-05	0.281791	-17.6144	1.32978	2535.37		Iolite						0.281792	1.9e-05	1.4672	6e-05	1.88657	9.3e-05	0.0336	0.004	0.00103	0.00012	15.51	28.698
NDZ10	SD06A	4	4	16	548.324	19.0912		0.00067	0.00015	0.28266	1.8e-05	0.282653	7.59066	1.11494	950.083		Iolite						0.282647	1.8e-05	1.46737	0.00012	1.88647	0.00013	0.023	0.0059	0.00071	0.00016	24.7	15.03
NDZ10	SD06A	5	5	16	794.133	23.1642		0.00122	0.00015	0.282488	3.4e-05	0.28247	6.64018	1.79117	1203.18		Iolite						0.282474	3.4e-05	1.46721	0.00014	1.88668	0.00013	0.0398	0.0062	0.00129	0.00016	25.1	6.5293
NDZ10	SD06A	6	6	16	793.512	25.4767		0.000632	4.6e-05	0.282504	1.7e-05	0.282495	7.50485	1.19274	1154.31		Iolite						0.282491	1.7e-05	1.46728	7.5e-05	1.88677	8.9e-05	0.0195	0.0008	0.000669	4.9e-05	27	18.182
NDZ10	SD06A	8	8	16	823.004	24.491		0.00057	0.0001	0.282519	2.4e-05	0.28251	8.72479	1.45178	1110.04		Iolite						0.282506	2.4e-05	1.46731	8.8e-05	1.88654	0.00015	0.0174	0.0038	0.0006	0.00011	23.2	25.541
NDZ10	SD06A	9	9	16	814.81	25.6258		0.000788	3.8e-05	0.28255	2.1e-05	0.282538	9.52224	1.33166	1058.68		Iolite						0.282537	2.1e-05	1.46732	6.6e-05	1.88653	0.00011	0.0262	0.0015	0.000834	4e-05	22.6	16.081
NDZ10	SD06A	10	10	16	627.102	19.2717		0.000731	4.6e-05	0.282629	2.8e-05	0.28262	8.20563	1.43626	979.614		Iolite						0.282616	2.8e-05	1.46725	0.00025	1.88657	0.00035	0.0236	0.0015	0.000774	4.8e-05	27.6	4.897
NDZ10	SD06A	11	11	16	613.087	18.5557		0.000793	1.2e-05	0.282626	1.1e-05	0.282617	7.76522	0.802759	992.943		Iolite						0.282612	1.1e-05	1.46724	4.7e-05	1.88666	6.9e-05	0.02672	0.00037	0.000839	1.2e-05	35.59	27.65
NDZ10	SD06A	13	13	16	595.094	19.6288		0.00027	3.8e-05	0.282554	1.8e-05	0.282551	5.02733	1.09133	1131.87		Iolite						0.282541	1.8e-05	1.46727	3.8e-05	1.88665	8e-05	0.0092	0.0015	0.000286	4e-05	26.9	22.391
NDZ10	SD06A	14	14	16	818.602	26.1721		0.00064	0.00011	0.282462	2.4e-05	0.282452	6.56926	1.49323	1227.03		Iolite						0.282449	2.4e-05	1.46727	0.00011	1.8867	8.5e-05	0.021	0.0035	0.00068	0.00012	30.22	16.082
NDZ10	SD06A	15	15	16	559.85	18.0004		0.001401	9.8e-05	0.282653	1.8e-05	0.282638	7.32455	1.06322	974.406		Iolite						0.28264	1.8e-05	1.46725	5.2e-05	1.88668	7.6e-05	0.0518	0.004	0.00148	0.0001	25.5	21.339
NDZ10	SD06A	16	16	16	29.4559	1.81792		0.0008	6.2e-05	0.283031	1.5e-05	0.283031	9.33887	0.571251	429.379		Iolite						0.283018	1.5e-05	1.46722	5.6e-05	1.88672	8.9e-05	0.0292	0.0023	0.000846	6.5e-05	18.89	19.235
NDZ10	SD06A	17	17	16	33.683	2.45223		0.000572	6e-05	0.283049	1.7e-05	0.283049	10.0724	0.656299	391.127		Iolite						0.283036	1.7e-05	1.46725	8.1e-05	1.8866	0.00015	0.0205	0.0021	0.000605	6.3e-05	19.6	27.645
NDZ10	SD06A	18	18	16	31.0275	1.58646		0.000544	2.7e-05	0.283044	1e-05	0.283044	9.83801	0.38897	402.289		Iolite						0.283031	1e-05	1.46725	3.4e-05	1.88664	8.8e-05	0.0202	0.0012	0.000575	2.8e-05	22	29.087
NDZ10	SD06A	19	19	16	617.753	23.999		0.000368	1.1e-05	0.282625	1.3e-05	0.282621	8.00729	0.999917	983.145		Iolite						0.282612	1.3e-05	1.4672	4.6e-05	1.88663	8.7e-05	0.01335	0.00053	0.000389	1.2e-05	23.07	28.698
NDZ10	SD06A	20	20	16	719.147	22.7819		0.000727	3.1e-05	0.282535	2.1e-05	0.282525	6.90906	1.26243	1127.19		Iolite						0.282521	2.1e-05	1.46742	0.00013	1.88648	0.00012	0.0245	0.0023	0.000769	3.3e-05	21	17.133
NDZ10	SD06A	21	21	16	610.327	20.1334		0.000445	2.3e-05	0.282597	1.7e-05	0.282592	6.81905	1.05918	1043.8		Iolite						0.282584	1.7e-05	1.4672	5.9e-05	1.8866	0.00013	0.0155	0.0011	0.00047	2.4e-05	23.81	20.284
NDZ10	SD06A	23	23	16	709.106	22.7872		0.000769	5.8e-05	0.282601	2e-05	0.282591	9.00514	1.23944	1001.51		Iolite						0.282588	2e-05	1.46724	0.00012	1.88669	0.00013	0.0238	0.0016	0.000812	6.1e-05	22.7	17.131
NDZ10	SD06A	24	24	16	785.923	26.1176		0.001228	7.9e-05	0.282557	1.6e-05	0.282539	8.90145	1.17873	1069.92		Iolite						0.282543	1.6e-05	1.46723	4e-05	1.88673	8.2e-05	0.0453	0.003	0.001297	8.4e-05	21.42	24.494
NDZ10	SD06A	25	25	16	604.864	19.0226		0.000545	1.8e-05	0.282567	2.1e-05	0.282561	5.59506	1.17257	1107.99		Iolite						0.282553	2.1e-05	1.46737	0.00012	1.88656	0.00015	0.0183	0.0013	0.000575	1.9e-05	22.5	15.028
NDZ10	SD06A	26	26	16	574.035	20.8447		0.001085	4.8e-05	0.282642	2.1e-05	0.28263	7.36171	1.21668	983.849		Iolite						0.282629	2.1e-05	1.46723	8.8e-05	1.88661	0.00031	0.0389	0.003	0.001145	5.1e-05	16.2	9.771
NDZ10	SD06A	27	27	16	757.328	25.8345		0.000607	4.2e-05	0.281829	1.9e-05	0.28182	-17.1951	1.26684	2490.33		Iolite						0.281815	1.9e-05	1.46719	4.5e-05	1.88674	7.9e-05	0.0216	0.0018	0.000641	4.4e-05	20.52	27.647
NDZ10	SD06A	28	28	16	802.249	25.9099		0.00112	0.00018	0.282538	3.2e-05	0.282521	8.64186	1.79984	1097.77		Iolite						0.282525	3.2e-05	1.46739	0.00016	1.88659	0.00013	0.037	0.0063	0.00118	0.00019	22.1	5.3051
NDZ10	SD06A	29	29	16	621.475	19.4744		0.0005	1.8e-05	0.282597	2e-05	0.282591	7.04404	1.1482	1040.24		Iolite						0.282584	2e-05	1.46732	9.8e-05	1.88661	0.00015	0.01731	0.00044	0.000527	1.9e-05	20.9	16.079
NDZ10	SD06A	30	30	16	984.098	30.8147		0.000402	1.1e-05	0.282412	1.8e-05	0.282405	8.6329	1.33687	1246.48		Iolite						0.282399	1.8e-05	1.46732	7.5e-05	1.88656	0.00011	0.01291	0.00038	0.000424	1.2e-05	24.4	20.287
NDZ10	SD06A	31	31	16	537.859	17.2764		0.000663	5.4e-05	0.282384	1.8e-05	0.282377	-2.40929	1.0378	1500.78		Iolite						0.282371	1.8e-05	1.46719	9.6e-05	1.88656	0.00011	0.0211	0.0017	0.000699	5.7e-05	26.38	8.7209
NDZ10	SD06A	32	32	16	589.056	20.7471		0.000145	1.3e-05	0.282254	1.7e-05	0.282252	-5.68119	1.0718	1723.45		Iolite						0.282241	1.7e-05	1.46726	8.8e-05	1.88673	0.00011	0.00511	0.00062	0.000152	1.4e-05	26.2	15.026
NDZ10	SD06A	33	33	16	681.68	22.6954		0.000824	3.6e-05	0.28249	0.00018	0.282479	4.44419	6.89154	1234.67		Iolite						0.28248	0.00018	1.4677	0.001	1.8865	0.0011	0.0283	0.0032	0.000867	3.8e-05	18.4	3.2646
NDZ10	SD06A	35	35	16	660.718	18.9576		0.00075	0.00013	0.282494	1.6e-05	0.282485	4.15748	1.04338	1233.71		Iolite						0.282481	1.6e-05	1.46734	5.7e-05	1.8866	0.00015	0.0264	0.0046	0.00079	0.00014	19.3	16.081
NDZ10	SD06A	36	36	16	776.87	24.3718		0.00115	0.00011	0.282584	1.4e-05	0.282567	9.70116	1.08704	1017.69		Iolite						0.282571	1.4e-05	1.4672	4.1e-05	1.88677	7.2e-05	0.0397	0.0044	0.00121	0.00012	23.67	28.7
NDZ10	SD06A	37	37	16	713.668	21.53		0.000327	5.8e-05	0.282445	2.2e-05	0.282441	3.79069	1.28885	1297.08		Iolite						0.282432	2.2e-05	1.46724	6.8e-05	1.88676	0.00013	0.0111	0.0025	0.000344	6.1e-05	20.11	19.236
NDZ10	SD06A	39	39	16	31.7832	1.54199		0.001436	1.9e-05	0.282796	1.1e-05	0.282795	1.06527	0.422259	899.298		Iolite						0.282783	1.1e-05	1.46723	4.7e-05	1.8867	7.2e-05	0.05287	0.00079	0.001506	2e-05	22.12	28.703
NDZ10	SD06A	40	40	16	30.0879	1.3118		0.001418	7e-05	0.282785	1.6e-05	0.282784	0.640532	0.595231	921.851		Iolite						0.282772	1.6e-05	1.46728	4.1e-05	1.88674	0.0001	0.0499	0.0016	0.001486	7.3e-05	20.83	27.65
NDZ10	SD06A	41	41	16	784.992	22.8681		0.0018	0.00013	0.282564	1.6e-05	0.282537	8.8295	1.12637	1073.19		Iolite						0.282551	1.6e-05	1.46726	9.5e-05	1.8867	0.00012	0.0614	0.0051	0.00185	0.00013	24.36	17.133
NDZ10	SD06A	42	42	16	544.481	17.0065		0.00248	0.00014	0.282676	2e-05	0.282651	7.41662	1.1148	956.741		Iolite						0.282663	2e-05	1.46732	7.9e-05	1.88664	0.0001	0.0813	0.0028	0.00255	0.00015	18	28.471
NDZ10	SD06A	43	43	16	580.978	18.8746		0.00084	0.00012	0.282605	1.5e-05	0.282596	6.29757	0.993335	1049.22		Iolite						0.282592	1.5e-05	1.46723	4.9e-05	1.88678	8e-05	0.0313	0.0047	0.00086	0.00012	21.52	28.7
NDZ10	SD06A	44	44	16	583.024	18.8731		0.000602	4.9e-05	0.282448	1.8e-05	0.282441	0.875688	1.07404	1354.15		Iolite						0.282435	1.8e-05	1.46723	5.5e-05	1.8866	0.00012	0.0222	0.0019	0.000617	5e-05	27.93	15.029
NDZ10	SD06A	46	46	16	568.727	27.7343		0.00387	0.00021	0.282696	2.7e-05	0.282655	8.10378	1.59193	937.836		Iolite						0.282683	2.7e-05	1.46725	5.4e-05	1.8867	0.00014	0.149	0.0073	0.00396	0.00022	17.85	15.025
NDZ10	SD06A	47	47	16	611.693	28.9582		0.001657	7.5e-05	0.282615	2.3e-05	0.282596	6.99306	1.46676	1035.15		Iolite						0.282601	2.3e-05	1.4673	0.00012	1.88656	0.00025	0.0554	0.0035	0.0017	7.7e-05	10.7	10.824
NDZ10	SD06A	48	48	16	942.049	43.261		0.00068	2.3e-05	0.282113	1.7e-05	0.282101	-3.08067	1.57836	1862.77		Iolite						0.282099	1.7e-05	1.46726	6.6e-05	1.88661	0.00011	0.0239	0.0012	0.000697	2.4e-05	22.8	18.182
NDZ10	SD06A	49	49	16	850.617	39.9843		0.00204	0.00024	0.282485	4.7e-05	0.282452	7.29945	2.6587	1212.26		Iolite						0.282472	4.7e-05	1.46756	0.00031	1.8863	0.00042	0.059	0.0055	0.0021	0.00024	13.9	8.7219
NDZ10	SD06A	50	50	16	1809.23	13.4208		0.00105	0.00016	0.28151	0.00012	0.281474	-5.50049	4.75796	2692.37		Iolite						0.28149	0.00012	1.46786	0.0008	1.88626	0.00076	0.0333	0.0052	0.00108	0.00017	15.3	4.0808
NDZ10	SD06A	51	51	16	31.197	1.93341		0.001207	1.1e-05	0.28322	0.00027	0.283219	16.0523	9.59035	47.9887		Iolite						0.2832	0.00027	1.4692	0.0018	1.8816	0.0059	0.0486	0.0088	0.001238	1.1e-05	2	2.8566
NDZ10	SD06A	53	53	16	891.582	42.1678		0.00123	0.00011	0.282494	1.9e-05	0.282473	8.97228	1.66291	1152.08		Iolite						0.28248	1.9e-05	1.46724	5.2e-05	1.88663	0.0001	0.0352	0.0022	0.00126	0.00011	23.4	24.493
NDZ10	SD06A	56	56	16	571.351	29.5861		0.000975	3.3e-05	0.2826	2e-05	0.28259	5.85797	1.368	1066.06		Iolite						0.282587	2e-05	1.4673	6.6e-05	1.88655	0.00012	0.0316	0.0017	0.001	3.4e-05	13.63	25.545
NDZ10	SD06A	58	58	16	583.689	27.9563		0.001014	3.8e-05	0.282317	1.9e-05	0.282306	-3.90827	1.29806	1620.85		Iolite						0.282303	1.9e-05	1.46719	5.8e-05	1.88675	0.0001	0.0363	0.0017	0.001042	3.9e-05	22.03	28.697
NDZ10	SD06A	59	59	16	786.664	36.6508		0.000966	2.6e-05	0.282059	1.3e-05	0.282045	-8.58649	1.27855	2041.79		Iolite						0.282045	1.3e-05	1.46729	7.2e-05	1.88655	0.00013	0.0332	0.0011	0.000992	2.7e-05	27.3	23.441
NDZ10	SD06A	61	61	16	627.672	29.5367		0.001013	8e-05	0.282662	3.2e-05	0.28265	9.26889	1.81405	920.33		Iolite						0.282649	3.2e-05	1.46741	0.00011	1.88629	0.00018	0.032	0.0018	0.001042	8.3e-05	19.6	13.979
NDZ10	SD06A	62	62	16	890.289	44.3137		0.000839	1.7e-05	0.282493	3.5e-05	0.282479	9.14119	2.23042	1141.58		Iolite						0.28248	3.5e-05	1.46714	0.00017	1.88673	0.0003	0.02454	0.00083	0.000863	1.7e-05	31.84	7.6691
NDZ10	SD06A	63	63	16	654.19	32.0632		0.0004175	3.4e-06	0.282284	2e-05	0.282279	-3.27844	1.42318	1642.47		Iolite						0.282271	2e-05	1.46724	4.4e-05	1.88659	9.1e-05	0.01464	0.00025	0.0004295	3.5e-06	17.28	28.701
NDZ10	SD06A	64	64	16	2394.93	10.724		0.000514	1.2e-05	0.281046	3.8e-05	0.281022	-7.94883	1.61735	3295.13		Iolite						0.281033	3.8e-05	1.46732	7.6e-05	1.88654	0.00014	0.01677	0.00073	0.000529	1.2e-05	18.6	25.545
NDZ10	SD06A	65	65	16	966.768	44.1656		0.000574	2.3e-05	0.282077	1.4e-05	0.282067	-3.73914	1.49617	1918.96		Iolite						0.282064	1.4e-05	1.46729	5.2e-05	1.88666	0.0001	0.01891	0.00066	0.000591	2.3e-05	24.8	22.39
NDZ10	SD06A	66	66	16	879.692	40.1835		0.000801	7.6e-06	0.282394	1.6e-05	0.282381	5.42164	1.46031	1340.71		Iolite						0.282381	1.6e-05	1.46725	3.6e-05	1.88668	5.2e-05	0.02959	0.0003	0.0008248	7.8e-06	24.44	28.696
NDZ10	SD06A	67	67	16	652.428	30.76		0.000974	9.4e-05	0.282671	2.2e-05	0.282659	10.1458	1.49569	891.2		Iolite						0.282657	2.2e-05	1.4674	0.00013	1.88652	0.0001	0.0282	0.0017	0.001003	9.7e-05	17.6	18.184
NDZ10	SD06A	69	69	16	670.744	32.7232		0.00074	0.00019	0.282639	2.4e-05	0.28263	9.51817	1.66125	941.424		Iolite						0.282626	2.4e-05	1.46728	9.5e-05	1.88669	0.00017	0.0244	0.0043	0.00076	0.00019	23	17.135
NDZ10	SD06A	70	70	16	664.455	32.5432		0.000434	3.3e-05	0.282603	8.5e-05	0.282598	8.24	3.75046	1008.09		Iolite						0.282589	8.5e-05	1.4676	0.00074	1.88621	0.00051	0.01367	0.00075	0.000448	3.5e-05	24.8	4.4399
NDZ10	SD06A	71	71	16	791.609	36.3289		0.0012	0.00011	0.282273	6.6e-05	0.282255	-1.02069	3.19069	1627.74		Iolite						0.282259	6.6e-05	1.46731	0.00021	1.88636	0.00038	0.0372	0.0049	0.00124	0.00012	19	7.6689
NDZ10	SD06A	72	72	16	664.015	31.2235		0.000756	4.5e-05	0.282481	1.1e-05	0.282472	3.76707	1.0986	1258.2		Iolite						0.282468	1.1e-05	1.46721	3.6e-05	1.88667	8e-05	0.0275	0.002	0.00078	4.6e-05	20.66	28.695
NDZ10	SD06A	75	75	16	936.031	41.9782		0.00078	0.00022	0.282132	3.3e-05	0.282118	-2.6035	2.24274	1831.58		Iolite						0.282118	3.3e-05	1.46744	9.3e-05	1.88659	0.00017	0.0269	0.0077	0.00081	0.00023	19.6	16.079
NDZ10	SD06A	77	77	16	616.164	29.8708		0.000622	5.3e-05	0.282617	1.6e-05	0.28261	7.58436	1.25004	1005.6		Iolite						0.282604	1.6e-05	1.46719	4.6e-05	1.88667	8.4e-05	0.0212	0.0016	0.000642	5.4e-05	23.22	27.643
NDZ10	SD06A	78	78	16	682.367	31.8589		0.001151	4.8e-05	0.282515	1.9e-05	0.2825	5.196	1.38991	1193.19		Iolite						0.282502	1.9e-05	1.46732	8.3e-05	1.88648	0.00012	0.041	0.0011	0.00119	4.9e-05	23.1	21.341
NDZ10	SD06A	80	80	16	620.216	29.9494		0.000592	3e-05	0.282536	2.6e-05	0.282529	4.818	1.59658	1163.95		Iolite						0.282523	2.6e-05	1.4674	9.7e-05	1.88652	0.00015	0.02135	0.00057	0.000612	3.1e-05	21.3	17.129
NDZ10	SD06A	82	82	16	2434.96	11.5427		0.000439	2.1e-05	0.28122	0.00017	0.2812	-0.716645	6.34662	2938.77		Iolite						0.28121	0.00017	1.46724	6.7e-05	1.88661	0.00011	0.0149	0.00041	0.000454	2.1e-05	29.5	18.183
NDZ10	SD06A	84	84	16	610.038	29.0233		0.000447	2.9e-05	0.282244	2.3e-05	0.282239	-5.6882	1.47116	1740.63		Iolite						0.28223	2.3e-05	1.46736	0.00011	1.88644	0.00023	0.01596	0.00089	0.000462	3e-05	27.4	10.821
NDZ10	SD06A	85	85	16	613.668	29.4752		0.000523	3.4e-05	0.282269	1.6e-05	0.282263	-4.75344	1.23414	1691.75		Iolite						0.282255	1.6e-05	1.46725	4.8e-05	1.88667	0.00011	0.0194	0.0012	0.000541	3.6e-05	23.48	19.235
NDZ10	SD06A	86	86	16	564.631	29.6422		0.000633	8.1e-05	0.282619	1.9e-05	0.282612	6.51242	1.35939	1023.89		Iolite						0.282606	1.9e-05	1.46725	5.4e-05	1.88665	9.6e-05	0.0192	0.0028	0.000655	8.4e-05	12.97	27.645
NDZ10	SD06A	87	87	16	579.1	27.792		0.00056	0.00011	0.282612	1.7e-05	0.282606	6.61217	1.26167	1030.04		Iolite						0.282598	1.7e-05	1.46724	6.7e-05	1.88673	0.00013	0.0177	0.0044	0.00058	0.00012	22.32	16.081
NDZ10	SD06A	88	88	16	559.969	26.7173		0.000527	3.6e-05	0.282608	2e-05	0.282602	6.05956	1.314	1045.52		Iolite						0.282595	2e-05	1.4674	0.00016	1.8866	0.00014	0.01595	0.00084	0.000545	3.7e-05	24.3	15.03
NDZ10	SD06A	89	89	16	844.717	37.9413		0.001015	4.2e-05	0.282509	4e-05	0.282493	8.60252	2.27532	1134.57		Iolite						0.282495	4e-05	1.46755	8e-05	1.88638	0.0002	0.0295	0.001	0.00105	4.4e-05	14.9	5.5649
NDZ10	SD06A	90	90	16	815.029	39.1452		0.00135	0.00019	0.282585	1.9e-05	0.282564	10.4612	1.63207	1006.19		Iolite						0.282571	1.9e-05	1.46722	8.2e-05	1.88661	0.00015	0.04	0.0056	0.0014	0.00019	28.74	16.083
NDZ10	SD06A	91	91	16	629.82	30.1419		0.00083	3.7e-05	0.28237	2.2e-05	0.28236	-0.947824	1.45741	1493.43		Iolite						0.282355	2.2e-05	1.46725	9.8e-05	1.88642	0.00016	0.0265	0.0014	0.000867	3.9e-05	19.4	17.132
NDZ10	SD06A	92	92	16	803.711	39.4652		0.000646	3.1e-05	0.282478	1.4e-05	0.282468	6.80253	1.38909	1201.89		Iolite						0.282462	1.4e-05	1.4673	5.5e-05	1.88655	8.4e-05	0.01839	0.0005	0.000675	3.2e-05	21.3	27.648
NDZ10	SD06A	93	93	16	620.146	29.1758		0.000655	5.1e-05	0.282648	2.4e-05	0.28264	8.75651	1.51672	943		Iolite						0.282633	2.4e-05	1.46744	8.9e-05	1.8865	0.00018	0.02164	0.00087	0.000684	5.3e-05	17	20.284
NDZ10	SD06A	94	94	16	633.348	29.2988		0.001307	6e-05	0.282674	2e-05	0.282658	9.69385	1.36967	901.058		Iolite						0.282658	2e-05	1.46725	6.2e-05	1.88668	0.00013	0.0368	0.0019	0.001365	6.2e-05	25.5	27.649
NDZ10	SD06A	95	95	16	639.396	32.3676		0.00067	6.5e-05	0.282623	1.7e-05	0.282615	8.29015	1.34638	984.874		Iolite						0.282607	1.7e-05	1.46728	8.4e-05	1.8867	0.00012	0.0231	0.0016	0.0007	6.8e-05	19.4	28.484
NDZ10	SD06A	96	96	16	600.879	28.4814		0.00095	0.00013	0.282639	2.9e-05	0.282628	7.89428	1.70489	975.765		Iolite						0.282623	2.9e-05	1.46728	9.2e-05	1.88653	0.0001	0.0325	0.0036	0.00099	0.00014	24	22.39
NDZ10	SD06A	97	97	16	840.4	38.7614		0.00214	7.6e-05	0.282527	3.8e-05	0.282493	8.51416	2.21289	1136		Iolite						0.282511	3.8e-05	1.46727	0.00032	1.88666	0.00024	0.072	0.0067	0.002236	8e-05	25.4	7.6699
NDZ10	SD06A	98	98	16	601.677	27.9781		0.000614	3.9e-05	0.282664	2.3e-05	0.282657	8.93161	1.44963	918.116		Iolite						0.282648	2.3e-05	1.4675	0.00017	1.88633	0.00023	0.0224	0.0018	0.000642	4e-05	22.9	13.977
NDZ10	SD06A	99	99	16	1601.05	13.0162		0.000546	3.7e-05	0.281571	1.5e-05	0.281554	-7.43208	0.866657	2630.09		Iolite						0.281556	1.5e-05	1.4672	4.6e-05	1.88662	6.6e-05	0.0206	0.0019	0.000571	3.9e-05	21.79	27.646
NDZ10	SD06A	100	100	16	764.489	36.8448		0.001106	4.3e-06	0.282425	1.7e-05	0.282409	3.82105	1.40969	1336.55		Iolite						0.282409	1.7e-05	1.46721	5.1e-05	1.88672	0.0001	0.04199	0.00047	0.0011558	4.5e-06	18.21	27.648
NDZ10	SD06A	101	101	16	871.537	39.8233		0.00108	8.2e-05	0.282514	3.5e-05	0.282496	9.33076	2.16358	1115.67		Iolite						0.282498	3.5e-05	1.46726	0.00045	1.88665	0.00048	0.0335	0.001	0.001129	8.5e-05	24.7	6.007
NDZ10	SD06A	102	102	16	591.653	28.0936		0.000447	2.4e-05	0.282416	1.8e-05	0.282411	-0.00572363	1.2711	1410.24		Iolite						0.282401	1.8e-05	1.46724	5e-05	1.88667	7.9e-05	0.01585	0.00065	0.000467	2.5e-05	22.52	27.647
NDZ10	SD06A	103	103	16	642.796	29.6529		0.001041	2.8e-05	0.282633	1.7e-05	0.28262	8.56049	1.26251	972.458		Iolite						0.282617	1.7e-05	1.46725	4.7e-05	1.88667	7.5e-05	0.0335	0.0011	0.001088	2.9e-05	24.09	26.594
NDZ10	SD06A	104	104	16	377.295	19.3381		0.001075	3.9e-05	0.282578	9.5e-06	0.28257	0.817166	0.765871	1191.55		Iolite						0.282562	9.5e-06	1.46726	4.3e-05	1.88665	5.6e-05	0.0382	0.0011	0.001123	4.1e-05	18.98	28.696
NDZ10	SD06A	105	105	16	577.3	27.2591		0.001122	5.4e-05	0.282623	3.9e-05	0.282611	6.74582	1.99591	1021.08		Iolite						0.282607	3.9e-05	1.46729	0.00021	1.88666	0.00025	0.0404	0.0027	0.001173	5.7e-05	26.8	13.977
NDZ10	SD06A	106	106	16	639.911	31.4361		0.000411	7e-05	0.282624	1.3e-05	0.282619	8.44733	1.19182	976.465		Iolite						0.282608	1.3e-05	1.46725	3.7e-05	1.88678	9.7e-05	0.0154	0.0026	0.00043	7.3e-05	23.06	28.698
NDZ10	SD06A	109	109	16	1260.02	14.2105		0.00102	7.4e-05	0.281965	3.2e-05	0.281941	-1.5328	1.51249	2033.47		Iolite						0.281949	3.2e-05	1.46726	0.00013	1.88669	0.00015	0.0379	0.0012	0.001066	7.7e-05	27.7	12.929
NDZ10	SD06A	111	111	16	516.925	23.9826		0.00134	0.00014	0.282632	2.1e-05	0.282619	5.67705	1.31154	1032.06		Iolite						0.282616	2.1e-05	1.46737	0.00013	1.88664	0.00016	0.0519	0.0031	0.0014	0.00015	20.7	18.185
NDZ10	SD06A	114	114	16	603.563	32.477		0.001523	6.1e-05	0.282655	1.9e-05	0.282638	8.28928	1.39722	955.757		Iolite						0.282638	1.9e-05	1.46726	4.9e-05	1.88676	0.0001	0.0552	0.0026	0.001592	6.3e-05	17.73	27.651
NDZ10	SD06A	115	115	16	639.832	30.1018		0.001155	4.2e-05	0.282661	1.8e-05	0.282647	9.43872	1.31165	920.691		Iolite						0.282645	1.8e-05	1.46738	6.2e-05	1.88654	0.00011	0.0379	0.0017	0.001207	4.4e-05	19.2	21.338
NDZ10	SD06A	116	116	16	721.563	34.245		0.000346	1.8e-05	0.282626	1.6e-05	0.282621	10.3689	1.34146	935.069		Iolite						0.282609	1.6e-05	1.46729	7.1e-05	1.88673	0.00013	0.01112	0.0004	0.000362	1.8e-05	32.7	18.183
NDZ10	SD06A	117	117	16	1075.04	48.6955		0.00171	0.00039	0.282297	3e-05	0.282262	5.65678	2.40869	1486.29		Iolite						0.28228	3e-05	1.46731	0.00012	1.8866	0.00021	0.072	0.015	0.00179	0.0004	24.2	22.388
NDZ10	SD06A	118	118	16	621.199	32.1908		0.001372	7.4e-05	0.282663	2.6e-05	0.282647	9.01429	1.64892	929.369		Iolite						0.282646	2.6e-05	1.46731	5.6e-05	1.88674	0.00011	0.0464	0.0011	0.001434	7.7e-05	16.2	27.647
NDZ10	SD06A	119	119	16	837.052	38.1789		0.000897	6.2e-05	0.282557	9.3e-06	0.282543	10.2114	1.20727	1038.19		Iolite						0.282541	9.3e-06	1.46726	4.4e-05	1.88671	6.3e-05	0.0312	0.0015	0.000938	6.5e-05	25.31	27.646
NDZ10	SD06A	120	120	16	600.758	28.0162		0.000482	3.9e-05	0.282608	1.5e-05	0.282603	6.98114	1.16949	1026.93		Iolite						0.282592	1.5e-05	1.46728	6.1e-05	1.88666	8.5e-05	0.01744	0.00083	0.000504	4e-05	24.7	27.645
NDZ10	SD06A	122	122	16	634.692	29.5252		0.00109	0.00016	0.28262	3.6e-05	0.282607	7.90242	1.98974	1002.81		Iolite						0.282603	3.6e-05	1.46745	0.00019	1.88653	0.00021	0.0474	0.0081	0.00114	0.00016	28.7	22.389
NDZ10	SD06A	123	123	16	604.813	27.9704		0.000871	8.4e-05	0.282633	1.4e-05	0.282623	7.79971	1.14495	984.275		Iolite						0.282616	1.4e-05	1.46724	4.4e-05	1.88669	6.5e-05	0.0335	0.0034	0.000911	8.8e-05	23.49	27.65
NDZ10	SD06A	124	124	16	597.039	27.8035		0.000324	1.4e-05	0.282285	1.7e-05	0.282281	-4.47596	1.22725	1663.04		Iolite						0.282268	1.7e-05	1.46729	5.6e-05	1.88663	0.00012	0.01391	0.00041	0.000339	1.5e-05	27.1	27.646
NDZ10	SD06A	125	125	16	287.008	13.6524		0.00361	0.00033	0.28266	3.5e-05	0.282641	1.28768	1.57682	1092.41		Iolite						0.282643	3.5e-05	1.46735	8.9e-05	1.88662	0.00019	0.141	0.007	0.00378	0.00034	10.8	19.233
NDZ10	SD06A	126	126	16	704.712	32.5994		0.00166	0.00018	0.282611	4.5e-05	0.282589	8.84379	2.38215	1006.98		Iolite						0.282594	4.5e-05	1.46754	0.00011	1.88605	0.00028	0.0602	0.0079	0.00174	0.00019	17.9	9.771
NDZ10	SD06A	127	127	16	607.571	32.7187		0.000504	5.5e-05	0.2824	0.00013	0.282394	-0.241956	5.35268	1436.22		Iolite						0.28238	0.00013	1.46757	0.00071	1.88621	0.00071	0.0174	0.0019	0.000528	5.7e-05	20.9	3.3952
NDZ10	SD06A	129	129	16	997.491	44.9445		0.00222	0.0001	0.282423	2.3e-05	0.282381	8.11006	1.83868	1286.58		Iolite						0.282406	2.3e-05	1.46728	8.6e-05	1.88649	0.00013	0.0845	0.0061	0.00233	0.0001	22.6	21.216
NDZ10	SD06A	130	130	16	916.347	42.0836		0.001474	5.7e-05	0.282532	2.3e-05	0.282507	10.7102	1.76445	1075		Iolite						0.282515	2.3e-05	1.46733	0.0001	1.88649	0.00017	0.0616	0.0042	0.001545	5.9e-05	28.4	22.389
Sample WD04A - Silica Glass, Western Desert, Egypt (aeolian sand)
NDZ10	WD04A	1	1	9	995.766	29.0795		0.00128685	0.00012084	0.281949	3.6387e-05	0.281925	-8.10456	2.00672	2182.32		0.969742	1.00004		3.42996	0.0097		0.281939	2.4e-05	1.46725	6.1e-05	1.8867	0.000172	0.054331	0.002865	0.001327	0.000116	8.45176	27	30
NDZ10	WD04A	2	2	9	683.096	22.4464		0.00041602	1.67268e-05	0.282487	3.64262e-05	0.282482	4.55526	1.79805	1229.61		0.969742	1.00004		3.42996	0.0097		0.282477	2.4e-05	1.46724	3.6e-05	1.88681	8.7e-05	0.016746	0.000297	0.000429	9e-06	9.97512	28	30
NDZ10	WD04A	3	3	9	1008.57	28.2038		0.000596392	2.15529e-05	0.28171	3.44635e-05	0.281699	-15.8305	1.86439	2614.69		0.969742	1.00004		3.42996	0.0097		0.2817	2.1e-05	1.4672	4.5e-05	1.88684	0.000115	0.023295	0.000687	0.000615	7e-06	11.0224	30	30
NDZ10	WD04A	4	4	9	595.633	21.0546		0.000592513	2.14266e-05	0.282285	3.223e-05	0.282278	-4.61359	1.61533	1669.55		0.969742	1.00004		3.42996	0.0097		0.282275	1.7e-05	1.46726	4.2e-05	1.88675	8.5e-05	0.025258	0.000581	0.000611	7e-06	12.4048	27	30
NDZ10	WD04A	5	5	9	624.554	16.4474		0.000766097	2.83594e-05	0.282285	3.33284e-05	0.282276	-4.04671	1.55411	1661.3		0.969742	1.00004		3.42996	0.0097		0.282275	1.9e-05	1.46722	4.9e-05	1.88671	6.8e-05	0.03164	0.000612	0.00079	1.1e-05	14.18	28	30
NDZ10	WD04A	6	6	9	602.173	18.0057		0.000819432	3.71175e-05	0.282024	3.07308e-05	0.282015	-13.8025	1.49835	2181.81		0.969742	1.00004		3.42996	0.0097		0.282014	1.4e-05	1.46721	4.5e-05	1.88672	0.000123	0.032852	0.00114	0.000845	2.5e-05	13.1364	27	30
NDZ10	WD04A	7	7	9	625.96	19.051		0.000363653	2.38809e-05	0.282414	3.33386e-05	0.28241	0.720334	1.61527	1397.44		0.969742	1.00004		3.42996	0.0097		0.282404	1.9e-05	1.46728	5.4e-05	1.88686	0.00012	0.015766	0.001135	0.000375	2.1e-05	12.3787	27	30
NDZ10	WD04A	9	9	9	512.023	15.2698		0.00102793	6.55626e-05	0.282243	3.51222e-05	0.282233	-8.09409	1.5987	1795.47		0.969742	1.00004		3.42996	0.0097		0.282233	2.2e-05	1.4672	4.5e-05	1.88686	9e-05	0.045948	0.002055	0.00106	5.7e-05	12.2545	28	30
NDZ10	WD04A	10	10	9	647.384	19.2972		0.000741853	3.44838e-05	0.282061	3.0734e-05	0.282052	-11.4671	1.52839	2089.35		0.969742	1.00004		3.42996	0.0097		0.282051	1.4e-05	1.46729	5.1e-05	1.88691	8.9e-05	0.031865	0.001416	0.000765	2.4e-05	13.7405	30	30
NDZ10	WD04A	11	11	9	730.355	20.0065		0.000345228	1.95181e-05	0.282493	3.39247e-05	0.282488	5.85532	1.65856	1195.26		0.969742	1.00004		3.42996	0.0097		0.282483	2e-05	1.4672	4.3e-05	1.8868	9.6e-05	0.012964	0.00042	0.000356	1.6e-05	11.4976	27	30
NDZ10	WD04A	12	12	9	664.627	20.9438		0.00218871	8.4501e-05	0.282706	3.51572e-05	0.282679	11.1151	1.72554	846.609		0.969742	1.00004		3.42996	0.0097		0.282696	2.2e-05	1.46723	5.7e-05	1.88669	0.000153	0.089241	0.001131	0.002257	4e-05	9.68791	28	30
NDZ10	WD04A	13	13	9	705.599	22.805		0.00168153	9.74499e-05	0.282206	3.57543e-05	0.282184	-5.49173	1.80212	1806.26		0.969742	1.00004		3.42996	0.0097		0.282196	2.3e-05	1.46726	5.7e-05	1.8868	8.7e-05	0.0795	0.006066	0.001734	8.1e-05	12.2447	30	30
NDZ10	WD04A	14	14	9	884.774	24.7139		0.00160686	6.8531e-05	0.282294	3.77604e-05	0.282267	1.5145	1.91256	1562.21		0.969742	1.00004		3.42996	0.0097		0.282284	2.6e-05	1.46717	4.5e-05	1.88683	9.8e-05	0.078472	0.003495	0.001657	4.2e-05	9.31819	29	30
NDZ10	WD04A	15	15	9	705.617	21.4613		0.00064003	2.27107e-05	0.282416	3.39187e-05	0.282408	2.43675	1.68738	1366.1		0.969742	1.00004		3.42996	0.0097		0.282406	2e-05	1.46726	5e-05	1.88693	0.000114	0.026941	0.000495	0.00066	6e-06	11.7075	28	30
NDZ10	WD04A	17	17	9	1006.35	28.3005		0.000555662	1.92797e-05	0.281865	3.77303e-05	0.281854	-10.3588	1.98182	2314.29		0.969742	1.00004		3.42996	0.0097		0.281855	2.6e-05	1.46721	4.9e-05	1.88687	0.000127	0.022147	0.000226	0.000573	3e-06	12.3121	30	30
NDZ10	WD04A	18	18	9	993.225	32.0434		0.000621605	2.3038e-05	0.282101	3.07375e-05	0.282089	-2.33065	1.81885	1862.53		0.969742	1.00004		3.42996	0.0097		0.282091	1.4e-05	1.46728	5.7e-05	1.88683	9.1e-05	0.025428	0.000325	0.000641	9e-06	13.8129	28	30
NDZ10	WD04A	19	19	9	668.967	19.6167		0.000884405	5.07845e-05	0.282278	3.2768e-05	0.282267	-3.37027	1.61418	1659.43		0.969742	1.00004		3.42996	0.0097		0.282268	1.8e-05	1.46724	4.3e-05	1.88693	8.6e-05	0.037233	0.001254	0.000912	4.2e-05	10.7074	27	30
NDZ10	WD04A	20	20	9	1050.21	27.4552		0.000610938	2.26998e-05	0.282106	3.16989e-05	0.282094	-0.876516	1.75245	1828.14		0.969742	1.00004		3.42996	0.0097		0.282096	1.6e-05	1.46725	5e-05	1.88687	6.2e-05	0.025272	0.000263	0.00063	9e-06	14.3186	29	30
NDZ10	WD04A	21	21	9	2034.53	16.1311		0.00071373	2.79932e-05	0.280969	3.11094e-05	0.280941	-19.2109	1.50956	3609.35		0.969742	1.00004		3.42996	0.0097		0.280959	1.5e-05	1.46729	4.1e-05	1.88689	8.4e-05	0.030542	0.000246	0.000736	1.4e-05	13.19	27	30
NDZ10	WD04A	22	22	9	2045.18	15.3702		0.000617726	2.87242e-05	0.281169	3.69984e-05	0.281145	-11.731	1.70415	3217.72		0.969742	1.00004		3.42996	0.0097		0.281159	2.5e-05	1.46726	5.3e-05	1.88688	9.4e-05	0.025193	0.001242	0.000637	2e-05	13.0479	30	30
NDZ10	WD04A	23	23	9	624.32	17.8913		0.00102502	4.44222e-05	0.282103	3.7747e-05	0.282091	-10.6047	1.74588	2023.54		0.969742	1.00004		3.42996	0.0097		0.282093	2.6e-05	1.46724	3.6e-05	1.88684	0.000129	0.037176	0.001125	0.001057	2.8e-05	9.49931	30	30
NDZ10	WD04A	24	24	9	1033	33.5415		0.000731186	2.55438e-05	0.28227	3.51242e-05	0.282256	4.46977	2.00892	1518.11		0.969742	1.00004		3.42996	0.0097		0.28226	2.2e-05	1.46719	6.1e-05	1.88671	0.000114	0.028865	0.000256	0.000754	5e-06	11.1048	29	30
NDZ10	WD04A	25	25	9	631.8	18.6551		0.000794219	2.80744e-05	0.282271	3.64105e-05	0.282262	-4.39499	1.7116	1686.42		0.969742	1.00004		3.42996	0.0097		0.282261	2.4e-05	1.46723	7.3e-05	1.88679	0.000112	0.030332	0.000429	0.000819	7e-06	12.4366	27	30
NDZ10	WD04A	26	26	9	784.656	23.3939		0.000660395	2.33866e-05	0.282416	3.12325e-05	0.282406	4.17649	1.63745	1333.06		0.969742	1.00004		3.42996	0.0097		0.282406	1.5e-05	1.46721	5.1e-05	1.88684	7.9e-05	0.025662	0.000619	0.000681	6e-06	12.9234	27	30
NDZ10	WD04A	27	27	9	629.604	18.4197		0.00147498	5.08229e-05	0.282336	3.51292e-05	0.282319	-2.42685	1.66248	1575.46		0.969742	1.00004		3.42996	0.0097		0.282326	2.2e-05	1.46725	5.6e-05	1.88678	8.7e-05	0.05899	0.000463	0.001521	5e-06	11.7843	28	30
NDZ10	WD04A	28	28	9	1893.8	17.3899		0.000971682	3.71827e-05	0.281329	3.32522e-05	0.281294	-9.93797	1.61913	3000.2		0.969742	1.00004		3.42996	0.0097		0.281319	1.9e-05	1.46726	5.9e-05	1.8868	0.000103	0.039664	0.000934	0.001002	1.7e-05	11.9707	29	30
NDZ10	WD04A	29	29	9	1827.62	16.5834		0.000595422	6.07505e-05	0.281449	2.90745e-05	0.281428	-6.69528	1.48404	2771.9		0.969742	1.00004		3.42996	0.0097		0.281439	1e-05	1.46725	3.6e-05	1.88675	7.5e-05	0.021814	0.001976	0.000614	5.9e-05	12.9134	27	30
NDZ10	WD04A	30	30	9	888.115	28.8353		0.000562451	3.57197e-05	0.28191	3.44789e-05	0.281901	-11.4005	1.88493	2277.17		0.969742	1.00004		3.42996	0.0097		0.2819	2.1e-05	1.46722	4.1e-05	1.88682	7.4e-05	0.023382	0.001514	0.00058	3.1e-05	12.2095	29	30
NDZ10	WD04A	31	31	9	577.838	17.682		0.000435414	1.78067e-05	0.281968	3.84334e-05	0.281963	-16.171	1.75992	2292.49		0.969742	1.00004		3.42996	0.0097		0.281958	2.7e-05	1.46719	5.7e-05	1.88676	0.000127	0.017173	0.000367	0.000449	1e-05	9.06536	29	30
NDZ10	WD04A	32	32	9	1067.3	27.8557		0.00162141	7.97898e-05	0.282099	3.12055e-05	0.282066	-1.46557	1.76723	1874.43		0.969742	1.00004		3.42996	0.0097		0.282089	1.5e-05	1.46728	4.8e-05	1.88681	9.1e-05	0.064671	0.002029	0.001672	5.9e-05	14.9934	27	30
NDZ10	WD04A	33	33	9	1018.51	26.3851		0.000820402	3.41758e-05	0.281978	3.33039e-05	0.281962	-6.26284	1.78845	2099.39		0.969742	1.00004		3.42996	0.0097		0.281968	1.9e-05	1.46724	6e-05	1.88687	9e-05	0.02857	0.000551	0.000846	2e-05	13.0727	29	30
NDZ10	WD04A	34	34	9	575.044	19.1064		0.000882466	3.44665e-05	0.282269	3.122e-05	0.282259	-5.74585	1.53735	1715.82		0.969742	1.00004		3.42996	0.0097		0.282259	1.5e-05	1.46727	5.1e-05	1.88679	6.8e-05	0.036393	0.001034	0.00091	1.7e-05	12.5858	27	30
NDZ10	WD04A	35	35	9	986.157	30.6467		0.00200543	7.32607e-05	0.282208	3.33222e-05	0.282171	0.391519	1.88482	1706.35		0.969742	1.00004		3.42996	0.0097		0.282198	1.9e-05	1.46721	5.4e-05	1.8867	8.5e-05	0.078031	0.001177	0.002068	2.6e-05	9.82784	28	30
NDZ10	WD04A	36	36	9	1018.15	28.342		0.000481962	1.65595e-05	0.281955	3.57357e-05	0.281946	-6.85549	1.91212	2131.65		0.969742	1.00004		3.42996	0.0097		0.281945	2.3e-05	1.46723	5.1e-05	1.88684	8.4e-05	0.019086	0.000144	0.000497	1e-06	13.1456	30	30
NDZ10	WD04A	37	37	9	1077.64	33.8708		0.00229247	9.66763e-05	0.282312	3.57622e-05	0.282265	5.8245	2.05776	1479.08		0.969742	1.00004		3.42996	0.0097		0.282302	2.3e-05	1.46722	6.6e-05	1.88664	9.6e-05	0.086817	0.001947	0.002364	5.8e-05	8.33998	28	30
NDZ10	WD04A	38	38	9	620.577	18.4431		0.00086695	3.07313e-05	0.282353	2.99019e-05	0.282343	-1.76776	1.47645	1531.58		0.969742	1.00004		3.42996	0.0097		0.282343	1.2e-05	1.4672	4.5e-05	1.88682	8.2e-05	0.034558	0.000498	0.000894	8e-06	13.3894	27	30
NDZ10	WD04A	39	39	9	822.195	25.3185		0.00098041	3.47418e-05	0.281939	3.63862e-05	0.281924	-12.0669	1.86391	2261.25		0.969742	1.00004		3.42996	0.0097		0.281929	2.4e-05	1.46724	6.2e-05	1.88672	8.4e-05	0.037532	0.000502	0.001011	9e-06	9.91788	29	30
NDZ10	WD04A	40	40	9	893.553	27.3942		0.00120539	7.37686e-05	0.282203	3.64055e-05	0.282183	-1.2811	1.93349	1724.27		0.969742	1.00004		3.42996	0.0097		0.282193	2.4e-05	1.46721	6.2e-05	1.88662	0.000104	0.047978	0.003103	0.001243	6.3e-05	7.42571	29	30
NDZ10	WD04A	41	41	9	836.649	32.5652		0.00166796	0.000173585	0.28228	3.64111e-05	0.282254	-0.0524219	2.09095	1610.33		0.969742	1.00004		3.42996	0.0097		0.28227	2.4e-05	1.46716	3.5e-05	1.8868	9.5e-05	0.077914	0.005867	0.00172	0.000169	11.4561	27	30
NDZ10	WD04A	42	42	9	625.229	19.5478		0.000538207	2.82123e-05	0.282118	3.2755e-05	0.282112	-9.85097	1.60476	1982.73		0.969742	1.00004		3.42996	0.0097		0.282108	1.8e-05	1.46722	5.2e-05	1.88672	0.000115	0.019416	0.000655	0.000555	2.2e-05	9.55489	27	30
NDZ10	WD04A	43	43	9	2559.97	15.1641		0.000426687	3.43097e-05	0.281151	3.50396e-05	0.28113	-0.261713	1.65767	3015.62		0.969742	1.00004		3.42996	0.0097		0.281141	2.2e-05	1.46719	3e-05	1.88677	0.000101	0.016558	0.001668	0.00044	3.2e-05	13.5813	30	30
NDZ10	WD04A	44	44	9	1008.43	39.0759		0.000693366	2.40964e-05	0.282132	3.17011e-05	0.282119	-0.941679	2.00934	1798.06		0.969742	1.00004		3.42996	0.0097		0.282122	1.6e-05	1.46726	4.4e-05	1.88684	9.9e-05	0.028418	0.00046	0.000715	4e-06	13.4522	27	30
NDZ10	WD04A	45	45	9	1011.72	29.0696		0.00139449	5.23727e-05	0.281789	3.44696e-05	0.281762	-13.5007	1.88994	2490.24		0.969742	1.00004		3.42996	0.0097		0.281779	2.1e-05	1.46723	6.5e-05	1.88688	0.000106	0.053499	0.001466	0.001438	2.2e-05	10.4122	27	30
NDZ10	WD04A	46	46	9	930.155	26.7821		0.00056633	2.05768e-05	0.281901	3.50963e-05	0.281891	-10.7868	1.85301	2277.02		0.969742	1.00004		3.42996	0.0097		0.281891	2.2e-05	1.46724	5e-05	1.88684	0.000108	0.02537	0.000606	0.000584	7e-06	12.7435	30	30
NDZ10	WD04A	47	47	9	619.45	17.1656		0.00112102	6.34136e-05	0.281915	2.9863e-05	0.281902	-17.4081	1.45732	2393.1		0.969742	1.00004		3.42996	0.0097		0.281905	1.2e-05	1.46724	4.8e-05	1.88688	9.6e-05	0.053531	0.003283	0.001156	5.2e-05	14.5085	28	30
NDZ10	WD04A	48	48	9	569.81	17.2046		0.000788401	2.8728e-05	0.282259	3.7758e-05	0.282251	-6.17881	1.72582	1735.61		0.969742	1.00004		3.42996	0.0097		0.282249	2.6e-05	1.46729	5.5e-05	1.88672	0.00012	0.029235	0.0003	0.000813	1e-05	9.41777	27	30
NDZ10	WD04A	49	49	9	2636.83	17.762		0.000524631	5.72093e-05	0.281121	4.28096e-05	0.281094	0.275554	2.03734	3049.09		0.969742	1.00004		3.42996	0.0097		0.281111	3.3e-05	1.46718	0.000111	1.88681	0.00012	0.022191	0.002505	0.000541	5.6e-05	10.7309	27	30
NDZ10	WD04A	50	50	9	626.987	17.0199		0.00182796	8.68677e-05	0.28217	3.57517e-05	0.282148	-8.50923	1.66543	1910.12		0.969742	1.00004		3.42996	0.0097		0.28216	2.3e-05	1.46724	4.4e-05	1.88681	0.000102	0.0809	0.003238	0.001885	6.2e-05	11.8454	30	30
NDZ10	WD04A	51	51	9	998.367	33.751		0.000682699	2.35963e-05	0.281887	3.70498e-05	0.281874	-9.84183	2.07926	2279.62		0.969742	1.00004		3.42996	0.0097		0.281877	2.5e-05	1.46723	5.1e-05	1.88666	9.6e-05	0.025885	0.000162	0.000704	3e-06	11.3344	30	30
NDZ10	WD04A	52	52	9	667.814	21.6249		0.00115399	5.54196e-05	0.282484	3.3924e-05	0.28247	3.7803	1.69778	1260.53		0.969742	1.00004		3.42996	0.0097		0.282474	2e-05	1.46722	4.6e-05	1.88671	5.7e-05	0.045311	0.001251	0.00119	4e-05	8.36505	27	30
NDZ10	WD04A	53	53	9	717.427	20.9629		0.000636151	2.35005e-05	0.282395	3.70862e-05	0.282386	1.95613	1.78928	1402.43		0.969742	1.00004		3.42996	0.0097		0.282385	2.5e-05	1.46723	6.5e-05	1.8869	8.9e-05	0.025432	0.000823	0.000656	9e-06	10.694	30	30
NDZ10	WD04A	55	55	9	1018.84	34.9421		0.000270558	1.04704e-05	0.282027	3.44879e-05	0.282022	-4.1439	2.01659	1983.09		0.969742	1.00004		3.42996	0.0097		0.282017	2.1e-05	1.46722	7.5e-05	1.88678	0.000117	0.010113	0.000336	0.000279	5e-06	8.6786	27	30
NDZ10	WD04A	56	56	9	1013.43	30.2291		0.000544026	2.06001e-05	0.281627	3.21758e-05	0.281617	-18.6288	1.8288	2770.61		0.969742	1.00004		3.42996	0.0097		0.281617	1.7e-05	1.46726	4.9e-05	1.88679	9.7e-05	0.020714	0.00062	0.000561	9e-06	12.3949	28	30
NDZ10	WD04A	57	57	9	631.016	20.7839		0.000403413	1.74713e-05	0.282595	3.39327e-05	0.28259	7.22611	1.67206	1037.78		0.969742	1.00004		3.42996	0.0097		0.282585	2e-05	1.46723	5.2e-05	1.88681	0.000103	0.01601	0.000319	0.000416	1.1e-05	11.8423	27	30
NDZ10	WD04A	58	58	9	2051	16.9183		0.000501357	2.19096e-05	0.281169	3.32395e-05	0.281149	-11.4372	1.59786	3206.59		0.969742	1.00004		3.42996	0.0097		0.281159	1.9e-05	1.46729	5.3e-05	1.88688	0.000117	0.020022	0.000747	0.000517	1.4e-05	9.18915	28	30
NDZ10	WD04A	60	60	9	818.578	27.4182		0.000945499	3.44548e-05	0.282415	3.07646e-05	0.2824	4.73701	1.71223	1329.3		0.969742	1.00004		3.42996	0.0097		0.282405	1.4e-05	1.46728	3.5e-05	1.88661	8.6e-05	0.035183	0.000826	0.000975	1.2e-05	9.98678	27	30
NDZ10	WD04A	61	61	9	581.492	18.081		0.000531419	1.84581e-05	0.282102	3.27537e-05	0.282096	-11.3823	1.56703	2032.3		0.969742	1.00004		3.42996	0.0097		0.282092	1.8e-05	1.46723	4.9e-05	1.88675	0.00011	0.021414	0.000366	0.000548	3e-06	13.0405	28	30
NDZ10	WD04A	62	62	9	631.047	18.0576		0.000955196	3.29917e-05	0.282353	3.64164e-05	0.282342	-1.57528	1.69894	1529.3		0.969742	1.00004		3.42996	0.0097		0.282343	2.4e-05	1.46729	4.6e-05	1.88669	0.000109	0.035262	0.00044	0.000985	4e-06	10.9358	29	30
NDZ10	WD04A	63	63	9	939.67	27.0583		0.000888284	4.34886e-05	0.281882	3.63821e-05	0.281866	-11.4506	1.91391	2320.94		0.969742	1.00004		3.42996	0.0097		0.281872	2.4e-05	1.46724	5.6e-05	1.88682	0.000169	0.027863	0.000734	0.000916	3.2e-05	7.72202	28	30
NDZ10	WD04A	64	64	9	609.09	17.734		0.000935801	3.3263e-05	0.282214	3.45023e-05	0.282203	-6.96978	1.62346	1810.79		0.969742	1.00004		3.42996	0.0097		0.282204	2.1e-05	1.46723	6e-05	1.88685	0.00013	0.036231	0.000394	0.000965	9e-06	10.7857	29	30
NDZ10	WD04A	65	65	9	614.435	18.8174		0.000722458	2.66099e-05	0.282575	3.51473e-05	0.282567	6.01827	1.67064	1092.04		0.969742	1.00004		3.42996	0.0097		0.282565	2.2e-05	1.46725	6.1e-05	1.88677	9.5e-05	0.027739	0.000191	0.000745	1e-05	11.3426	30	30
NDZ10	WD04A	66	66	9	983.548	28.8288		0.000567299	4.778e-05	0.281723	3.32836e-05	0.281712	-15.9074	1.85405	2599.06		0.969742	1.00004		3.42996	0.0097		0.281713	1.9e-05	1.46722	4.7e-05	1.88686	0.000102	0.020275	0.002492	0.000585	4.5e-05	15.353	27	30
NDZ10	WD04A	68	68	9	574.424	17.0958		0.000960045	3.46138e-05	0.282002	3.4486e-05	0.281992	-15.2434	1.60771	2238.93		0.969742	1.00004		3.42996	0.0097		0.281992	2.1e-05	1.46724	4.4e-05	1.88682	9.4e-05	0.038134	0.000278	0.00099	1.1e-05	13.3482	29	30
NDZ10	WD04A	69	69	9	485.899	16.984		0.000294802	1.08301e-05	0.282041	3.33089e-05	0.282038	-15.5766	1.5602	2187.2		0.969742	1.00004		3.42996	0.0097		0.282031	1.9e-05	1.4672	7e-05	1.88689	0.000135	0.011504	0.00025	0.000304	4e-06	8.87289	28	30
NDZ10	WD04A	70	70	9	744.005	21.8655		0.00263479	0.000284333	0.282439	3.91743e-05	0.282402	3.1113	1.988	1359.54		0.969742	1.00004		3.42996	0.0097		0.282429	2.8e-05	1.46729	6e-05	1.88679	7.8e-05	0.102849	0.010468	0.002717	0.000278	12.4125	28	30
NDZ10	WD04A	71	71	9	610.137	18.0067		0.00259988	0.000203824	0.282487	3.33445e-05	0.282457	2.04444	1.64012	1310.82		0.969742	1.00004		3.42996	0.0097		0.282477	1.9e-05	1.46721	4.6e-05	1.88665	0.000108	0.096856	0.005816	0.002681	0.000189	11.6163	27	30
NDZ10	WD04A	72	72	9	417.334	11.8362		0.00261443	9.03059e-05	0.282728	3.51588e-05	0.282708	6.57586	1.51512	900.747		0.969742	1.00004		3.42996	0.0097		0.282718	2.2e-05	1.46724	6.1e-05	1.88679	0.000156	0.119385	0.001294	0.002696	1.1e-05	8.01177	28	30
NDZ10	WD04A	73	73	9	969.773	26.9013		0.000653606	2.40574e-05	0.282014	3.44869e-05	0.282002	-5.95669	1.83626	2043.51		0.969742	1.00004		3.42996	0.0097		0.282004	2.1e-05	1.4672	4e-05	1.88683	9.6e-05	0.02443	0.000597	0.000674	9e-06	12.7705	28	30
NDZ10	WD04A	74	74	9	926.814	25.3251		0.00170093	5.96876e-05	0.282374	3.12289e-05	0.282344	5.19786	1.68984	1391.44		0.969742	1.00004		3.42996	0.0097		0.282364	1.5e-05	1.46728	3.6e-05	1.88685	0.000133	0.056129	0.000408	0.001754	1.3e-05	16.3293	27	30
NDZ10	WD04A	75	75	9	556.58	16.2156		0.00100077	5.401e-05	0.282378	3.27761e-05	0.282368	-2.33421	1.53477	1511.64		0.969742	1.00004		3.42996	0.0097		0.282368	1.8e-05	1.4673	6e-05	1.88684	0.000106	0.039583	0.001712	0.001032	4.3e-05	11.9896	27	30
NDZ10	WD04A	76	76	9	602.689	17.1204		0.00114333	5.38127e-05	0.282349	3.33335e-05	0.282336	-2.41244	1.57471	1553.03		0.969742	1.00004		3.42996	0.0097		0.282339	1.9e-05	1.46721	4.4e-05	1.88677	8.9e-05	0.044698	0.001682	0.001179	3.8e-05	12.0753	28	30
NDZ10	WD04A	77	77	9	745.885	23.7423		0.000465476	1.66857e-05	0.282153	3.70688e-05	0.282146	-5.90126	1.84992	1861.15		0.969742	1.00004		3.42996	0.0097		0.282143	2.5e-05	1.46726	7.1e-05	1.88678	0.000105	0.017521	0.000304	0.00048	5e-06	11.0775	30	30
NDZ10	WD04A	78	78	9	780.341	22.0153		0.00198991	7.71096e-05	0.282467	3.39227e-05	0.282438	5.19532	1.7112	1272.71		0.969742	1.00004		3.42996	0.0097		0.282457	2e-05	1.46725	7.9e-05	1.88672	0.000104	0.069499	0.001655	0.002052	3.7e-05	9.50731	27	30
NDZ10	WD04A	80	80	9	1898.78	17.286		0.000657485	2.30668e-05	0.281451	3.32619e-05	0.281427	-5.08992	1.60296	2742.14		0.969742	1.00004		3.42996	0.0097		0.281441	1.9e-05	1.46724	5.3e-05	1.8868	8.4e-05	0.024047	0.000342	0.000678	5e-06	13.465	28	30
NDZ10	WD04A	81	81	9	614.773	17.9828		0.00110454	4.8972e-05	0.282632	3.27967e-05	0.282619	7.88779	1.57389	987.431		0.969742	1.00004		3.42996	0.0097		0.282622	1.8e-05	1.46727	3.8e-05	1.88696	9.8e-05	0.046211	0.001687	0.001139	3.2e-05	11.1551	27	30
NDZ10	WD04A	82	82	9	581.181	17.7726		0.000747671	2.6528e-05	0.282098	3.38938e-05	0.28209	-11.6145	1.6012	2044.84		0.969742	1.00004		3.42996	0.0097		0.282088	2e-05	1.46723	4.2e-05	1.88692	8.6e-05	0.031992	0.000431	0.000771	7e-06	12.1424	30	30
NDZ10	WD04A	83	83	9	551.465	15.9443		0.00102599	4.38629e-05	0.282609	3.39338e-05	0.282598	5.72411	1.56578	1057.44		0.969742	1.00004		3.42996	0.0097		0.282599	2e-05	1.46725	4.4e-05	1.88674	0.000113	0.044052	0.000901	0.001058	2.7e-05	11.7558	29	30
NDZ10	WD04A	84	84	9	622.041	19.1821		0.000467416	1.61491e-05	0.282139	3.70678e-05	0.282134	-9.14851	1.74508	1941.46		0.969742	1.00004		3.42996	0.0097		0.282129	2.5e-05	1.46724	4.1e-05	1.88685	9.8e-05	0.020061	0.000115	0.000482	2e-06	12.5657	29	30
NDZ10	WD04A	85	85	9	628.814	21.8107		0.000948408	4.98854e-05	0.282665	4.06428e-05	0.282654	9.42777	1.93871	912.327		0.969742	1.00004		3.42996	0.0097		0.282655	3e-05	1.46723	4e-05	1.88668	0.000108	0.038549	0.001674	0.000978	3.9e-05	9.68882	30	30
NDZ10	WD04A	86	86	9	560.308	17.2051		0.000160008	6.21159e-06	0.282495	3.70933e-05	0.282493	2.20338	1.70091	1261.69		0.969742	1.00004		3.42996	0.0097		0.282485	2.5e-05	1.46725	4.1e-05	1.8868	7.7e-05	0.006529	0.000146	0.000165	3e-06	10.712	29	30
NDZ10	WD04A	87	87	9	611.723	19.9312		0.000694336	6.37684e-05	0.281999	3.33056e-05	0.281991	-14.4275	1.64501	2223.69		0.969742	1.00004		3.42996	0.0097		0.281989	1.9e-05	1.46718	6e-05	1.88671	9.4e-05	0.031624	0.0029	0.000716	6.1e-05	12.0863	29	30
NDZ10	WD04A	88	88	9	1804.35	19.5655		0.000536268	4.55755e-05	0.281244	3.50467e-05	0.281226	-14.4297	1.74435	3170.67		0.969742	1.00004		3.42996	0.0097		0.281234	2.2e-05	1.46722	5.3e-05	1.88676	6.9e-05	0.022949	0.001794	0.000553	4.3e-05	12.2869	29	30
NDZ10	WD04A	90	90	9	550.388	17.4921		0.00123642	4.31125e-05	0.282505	3.17323e-05	0.282492	1.9412	1.51871	1268.33		0.969742	1.00004		3.42996	0.0097		0.282495	1.6e-05	1.46728	4.6e-05	1.88686	0.000119	0.055374	0.000703	0.001275	8e-06	10.476	30	30
NDZ10	WD04A	91	91	9	577.476	17.3833		0.000743792	2.80405e-05	0.282257	3.22277e-05	0.282249	-6.06423	1.5344	1735.4		0.969742	1.00004		3.42996	0.0097		0.282247	1.7e-05	1.46716	5.3e-05	1.88675	0.000117	0.035666	0.000884	0.000767	1.2e-05	11.5097	28	30
NDZ10	WD04A	93	93	9	601.221	17.0476		0.000667183	2.30683e-05	0.282222	3.17086e-05	0.282214	-6.75095	1.50813	1792.39		0.969742	1.00004		3.42996	0.0097		0.282212	1.6e-05	1.46721	5.3e-05	1.88684	7.3e-05	0.027723	0.000306	0.000688	3e-06	16.4366	29	30
NDZ10	WD04A	94	94	9	607.427	17.6462		0.00030159	2.90565e-05	0.282224	3.33235e-05	0.282221	-6.39547	1.58551	1777.69		0.969742	1.00004		3.42996	0.0097		0.282214	1.9e-05	1.46727	6.1e-05	1.88666	0.000108	0.011132	0.001191	0.000311	2.8e-05	14.7548	27	30
NDZ10	WD04A	95	95	9	586.737	15.4041		0.00067882	2.39992e-05	0.282274	3.45069e-05	0.282267	-5.23332	1.57089	1696.78		0.969742	1.00004		3.42996	0.0097		0.282264	2.1e-05	1.46728	4.9e-05	1.88693	8.9e-05	0.02941	0.000518	0.0007	6e-06	12.1309	28	30
NDZ10	WD04A	97	97	9	1019.53	30.0184		0.000733125	2.56091e-05	0.28191	3.02783e-05	0.281896	-8.59093	1.75739	2227.98		0.969742	1.00004		3.42996	0.0097		0.2819	1.3e-05	1.46727	5.2e-05	1.88678	9.9e-05	0.030879	0.000519	0.000756	5e-06	12.8015	27	30
NDZ10	WD04A	98	98	9	2006.86	17.9838		7.56399e-05	1.09781e-05	0.281392	3.21565e-05	0.281389	-3.94342	1.57317	2767.1		0.969742	1.00004		3.42996	0.0097		0.281382	1.7e-05	1.46723	4.1e-05	1.88677	0.000104	0.004685	0.000649	7.8e-05	1.1e-05	16.6274	27	30
NDZ10	WD04A	99	99	9	596.901	19.0881		0.000732156	0.000102992	0.282102	2.98796e-05	0.282094	-11.1213	1.52004	2030.18		0.969742	1.00004		3.42996	0.0097		0.282092	1.2e-05	1.4673	5e-05	1.88682	0.0001	0.035596	0.004604	0.000755	0.000103	11.8445	27	30
NDZ10	WD04A	100	100	9	2583.94	16.6771		0.000841736	4.45594e-05	0.281002	3.44091e-05	0.28096	-5.73806	1.68428	3328.9		0.969742	1.00004		3.42996	0.0097		0.280992	2.1e-05	1.46728	6.9e-05	1.88691	0.00011	0.04014	0.001607	0.000868	3.5e-05	11.5059	27	30
NDZ10	WD04A	101	101	9	575.172	18.3965		0.000425717	1.47302e-05	0.28213	3.3316e-05	0.282125	-10.4901	1.59364	1978.11		0.969742	1.00004		3.42996	0.0097		0.28212	1.9e-05	1.4672	5e-05	1.88681	0.000105	0.019358	0.000282	0.000439	2e-06	11.8088	27	30
NDZ10	WD04A	102	102	9	1033.18	30.4584		0.000516873	1.81479e-05	0.281869	3.07174e-05	0.281859	-9.59192	1.78227	2293.71		0.969742	1.00004		3.42996	0.0097		0.281859	1.4e-05	1.46728	4.9e-05	1.88681	9.1e-05	0.024955	0.000712	0.000533	4e-06	14.5121	27	30
NDZ10	WD04A	103	103	9	611.826	19.3645		0.00101144	0.000100258	0.281973	3.51017e-05	0.281961	-15.4751	1.7073	2281.23		0.969742	1.00004		3.42996	0.0097		0.281963	2.2e-05	1.46722	5.9e-05	1.88688	7.5e-05	0.048679	0.005212	0.001043	9.7e-05	11.7926	28	30
NDZ10	WD04A	104	104	9	1047.47	27.6946		0.000570209	2.015e-05	0.282246	3.17107e-05	0.282235	4.05346	1.75737	1552.96		0.969742	1.00004		3.42996	0.0097		0.282236	1.6e-05	1.46725	4.6e-05	1.8869	0.000104	0.025939	0.000494	0.000588	5e-06	13.9978	27	30
NDZ10	WD04A	105	105	9	792.609	23.4618		0.00224495	0.000133137	0.282583	3.99049e-05	0.282549	9.43075	1.9815	1045.7		0.969742	1.00004		3.42996	0.0097		0.282573	2.9e-05	1.46727	6.1e-05	1.88692	8.6e-05	0.11416	0.008178	0.002315	0.000112	10.842	28	30
NDZ10	WD04A	106	106	9	850.639	26.3676		0.000727307	2.67649e-05	0.282421	3.27796e-05	0.282409	5.77846	1.76114	1297.22		0.969742	1.00004		3.42996	0.0097		0.282411	1.8e-05	1.46729	5.6e-05	1.88688	9.1e-05	0.029935	0.000251	0.00075	1e-05	14.2153	27	30
NDZ10	WD04A	107	107	9	1440.84	20.9587		0.000689487	3.38678e-05	0.281748	3.38664e-05	0.281729	-4.90409	1.70484	2363.78		0.969742	1.00004		3.42996	0.0097		0.281738	2e-05	1.46727	5.1e-05	1.88675	9.7e-05	0.03071	0.00194	0.000711	2.5e-05	12.1887	28	30
NDZ10	WD04A	108	108	9	925.381	28.2637		0.000670092	2.82849e-05	0.281926	3.38803e-05	0.281914	-10.0713	1.84577	2234		0.969742	1.00004		3.42996	0.0097		0.281916	2e-05	1.46722	4.5e-05	1.88674	8e-05	0.028431	0.00052	0.000691	1.7e-05	11.5401	29	30
NDZ10	WD04A	109	109	9	909.843	25.3647		0.00264255	0.000132738	0.282183	4.13555e-05	0.282138	-2.5081	2.07775	1805.25		0.969742	1.00004		3.42996	0.0097		0.282173	3.1e-05	1.46723	5.8e-05	1.88675	0.000113	0.114854	0.007923	0.002725	0.0001	8.37103	30	30
NDZ10	WD04A	110	110	9	575.284	16.4422		0.000795189	5.64791e-05	0.282005	3.91449e-05	0.281996	-15.0552	1.76887	2229.29		0.969742	1.00004		3.42996	0.0097		0.281995	2.8e-05	1.46729	5.8e-05	1.88687	0.000112	0.037176	0.002732	0.00082	5.1e-05	7.77534	30	30
NDZ10	WD04A	111	111	9	570.325	18.0139		0.000323894	1.1484e-05	0.282055	3.38904e-05	0.282052	-13.2146	1.60523	2124.26		0.969742	1.00004		3.42996	0.0097		0.282045	2e-05	1.46726	5.7e-05	1.88696	9e-05	0.016377	0.000129	0.000334	3e-06	9.93179	30	30
NDZ10	WD04A	112	112	9	866.732	24.3241		0.000782582	9.87528e-05	0.282167	3.1704e-05	0.282154	-2.89705	1.7197	1792.09		0.969742	1.00004		3.42996	0.0097		0.282157	1.6e-05	1.4672	6e-05	1.88683	8.8e-05	0.041345	0.00468	0.000807	9.8e-05	11.4605	27	30
NDZ10	WD04A	113	113	9	621.748	19.1045		0.000906709	3.23012e-05	0.282563	3.57809e-05	0.282552	5.67818	1.69968	1117.03		0.969742	1.00004		3.42996	0.0097		0.282553	2.3e-05	1.46716	6.7e-05	1.88687	0.000136	0.050953	0.002231	0.000935	9e-06	9.47763	30	30
NDZ10	WD04A	114	114	9	623.482	19.6071		0.000855313	5.1781e-05	0.282597	3.64342e-05	0.282587	6.94157	1.74299	1047.62		0.969742	1.00004		3.42996	0.0097		0.282587	2.4e-05	1.46717	6.9e-05	1.88685	0.000132	0.042805	0.000375	0.000882	4.4e-05	11.7422	30	30
NDZ10	WD04A	116	116	9	1923.01	16.9093		0.000586694	2.23381e-05	0.281344	3.50542e-05	0.281322	-8.24909	1.65847	2932.48		0.969742	1.00004		3.42996	0.0097		0.281334	2.2e-05	1.46718	5.5e-05	1.88687	0.00011	0.029225	0.000674	0.000605	1e-05	13.1792	30	30
NDZ10	WD04A	117	117	9	1884.36	16.7025		0.000822342	3.13033e-05	0.28158	3.27114e-05	0.28155	-1.045	1.57864	2510.86		0.969742	1.00004		3.42996	0.0097		0.28157	1.8e-05	1.46722	5.1e-05	1.88685	8.7e-05	0.038541	0.002275	0.000848	1.4e-05	12.4548	27	30
NDZ10	WD04A	118	118	9	1022.69	28.8364		0.000710821	4.74689e-05	0.282036	3.57417e-05	0.282022	-4.03939	1.94101	1980.43		0.969742	1.00004		3.42996	0.0097		0.282026	2.3e-05	1.46723	5.1e-05	1.88693	9.1e-05	0.039988	0.004754	0.000733	4.2e-05	9.84028	27	30
NDZ10	WD04A	119	119	9	1961.91	16.5955		0.00158747	5.51445e-05	0.281541	3.63572e-05	0.281482	-1.69588	1.73137	2608.94		0.969742	1.00004		3.42996	0.0097		0.281531	2.4e-05	1.46721	6.7e-05	1.88683	9.3e-05	0.086816	0.005122	0.001637	9e-06	11.9117	29	30
NDZ10	WD04A	120	120	9	676.219	18.5917		0.000419898	1.59219e-05	0.28229	3.17143e-05	0.282285	-2.57684	1.54435	1621.24		0.969742	1.00004		3.42996	0.0097		0.28228	1.6e-05	1.46722	5e-05	1.88689	9.5e-05	0.023445	0.001948	0.000433	7e-06	12.2672	27	30
NDZ10	WD04A	121	121	9	644.882	19.7705		0.000442203	1.62451e-05	0.28227	3.17127e-05	0.282265	-3.99166	1.56962	1674.55		0.969742	1.00004		3.42996	0.0097		0.28226	1.6e-05	1.46712	6.4e-05	1.88671	0.000104	0.027064	0.001514	0.000456	6e-06	11.6504	28	30
NDZ10	WD04A	123	123	9	2678.9	16.0603		0.000795189	2.8637e-05	0.280994	3.2664e-05	0.280953	-3.76483	1.58336	3299.95		0.969742	1.00004		3.42996	0.0097		0.280984	1.8e-05	1.46721	5.8e-05	1.88695	0.000152	0.046758	0.003838	0.00082	9e-06	10.88	27	30
NDZ10	WD04A	124	124	9	599.71	17.8717		0.00104538	3.90693e-05	0.28198	3.33041e-05	0.281968	-15.5048	1.58447	2273.27		0.969742	1.00004		3.42996	0.0097		0.28197	1.9e-05	1.46717	5.2e-05	1.88689	0.000125	0.050751	0.001641	0.001078	1.6e-05	11.8164	27	30
NDZ10	WD04A	125	125	9	611.592	18.0519		0.00078937	2.73515e-05	0.282533	3.57786e-05	0.282524	4.44105	1.67546	1178.06		0.969742	1.00004		3.42996	0.0097		0.282523	2.3e-05	1.4672	7.6e-05	1.88679	0.000125	0.048695	0.003225	0.000814	4e-06	9.21368	29	30
Sample WD12A - Wadi Tahl, Western Desert, Egypt (sandstone bedrock)
NDZ11	WD12A	1	1	15.2	691.899	18.5008		0.000295	6e-06	0.282639	2.5e-05	0.282635	10.1902	1.30223	920.907		Iolite						0.282644	2.5e-05	1.46728	5.3e-05	1.88672	0.00011	0.01453	0.00036	0.000389	7e-06	11.45	29.693
NDZ11	WD12A	3	3	15.2	668.583	19.4871		0.00141	0.00019	0.282605	2.6e-05	0.282587	7.96784	1.42909	1026.72		Iolite						0.282609	2.6e-05	1.46728	4.9e-05	1.88667	0.00013	0.075	0.011	0.00184	0.00025	10.01	30.743
NDZ11	WD12A	4	4	15.2	607.129	17.4319		0.000691	4.4e-05	0.282335	3e-05	0.282327	-2.62905	1.46485	1568.64		Iolite						0.282339	3e-05	1.46743	8.1e-05	1.88667	0.00016	0.038	0.0018	0.000896	5.7e-05	9.8	29.693
NDZ11	WD12A	5	5	15.2	1.662	0.130105		0.001428	8.4e-05	0.283023	2.4e-05	0.283023	8.45168	0.851575	457.187		Iolite						0.283027	2.4e-05	1.4673	5.2e-05	1.88676	0.00013	0.0847	0.0044	0.00183	0.00011	9.41	29.695
NDZ11	WD12A	6	6	15.2	1042.06	30.1476		0.000541	2.2e-05	0.28182	2.5e-05	0.281809	-11.1467	1.57507	2385.84		Iolite						0.281824	2.5e-05	1.46737	5.5e-05	1.88677	0.00014	0.0279	0.0016	0.000683	2.8e-05	8.9	29.692
NDZ11	WD12A	7	7	15.2	1781.74	15.4853		0.000506	1.5e-05	0.28133	2.6e-05	0.281313	-11.851	1.2928	3013.81		Iolite						0.281333	2.6e-05	1.46731	6.2e-05	1.88684	0.00011	0.0285	0.0012	0.000629	1.9e-05	8.72	29.691
NDZ11	WD12A	8	8	15.2	678.832	18.6799		0.001138	4.1e-05	0.282608	2.3e-05	0.282593	8.41862	1.24085	1009.77		Iolite						0.282611	2.3e-05	1.46731	7.6e-05	1.88673	0.00015	0.0561	0.0023	0.001388	5e-05	9.46	29.708
NDZ11	WD12A	9	9	15.2	684.727	18.9925		0.001016	3.6e-05	0.28229	2.2e-05	0.282277	-2.65976	1.21121	1632.68		Iolite						0.282294	2.2e-05	1.46729	5.3e-05	1.88679	0.00011	0.0556	0.0019	0.001213	4.2e-05	10.26	29.695
NDZ11	WD12A	10	10	15.2	1994.21	15.0384		0.001521	5.2e-05	0.281344	1.8e-05	0.281286	-7.89084	1.04258	2970.25		Iolite						0.281347	1.8e-05	1.46734	5.6e-05	1.88688	0.00013	0.0719	0.0027	0.001776	6.2e-05	8.69	29.693
NDZ11	WD12A	11	11	15.2	679.969	18.5439		0.001874	2.3e-05	0.282663	2.5e-05	0.282639	10.0577	1.29129	918.619		Iolite						0.282666	2.5e-05	1.46729	7e-05	1.88667	0.00012	0.0867	0.0014	0.002135	2.8e-05	8.63	29.691
NDZ11	WD12A	12	12	15.2	1055.16	30.8279		0.0015	3.8e-05	0.28233	2e-05	0.2823	6.54603	1.40632	1420.68		Iolite						0.282334	2e-05	1.46726	5.6e-05	1.88677	0.00012	0.07379	0.00096	0.001661	4e-05	9.07	29.692
NDZ11	WD12A	13	13	15.2	770.164	21.0248		0.000272	3e-06	0.282482	2.8e-05	0.282478	6.39274	1.46481	1197.54		Iolite						0.282485	2.8e-05	1.46731	5.1e-05	1.88669	0.00014	0.01191	0.00024	0.000293	3e-06	8.77	29.697
NDZ11	WD12A	14	14	15.2	576.609	15.5916		0.000943	2.1e-05	0.282585	2.3e-05	0.282575	5.454	1.16375	1092.98		Iolite						0.282588	2.3e-05	1.46731	4.6e-05	1.88657	0.00012	0.04549	0.00094	0.000986	2.1e-05	8.16	29.692
NDZ11	WD12A	15	15	15.2	967.313	25.9444		0.001308	6.9e-05	0.281474	2.6e-05	0.28145	-25.5718	1.53135	3109.94		Iolite						0.281477	2.6e-05	1.46731	5.8e-05	1.88676	0.00013	0.052	0.0036	0.001326	7.1e-05	9.69	29.696
NDZ11	WD12A	16	16	15.2	753.609	18.9549		0.000725	3.7e-05	0.282065	1.8e-05	0.282055	-8.97705	1.07503	2036.92		Iolite						0.282068	1.8e-05	1.46723	5.1e-05	1.88671	0.00012	0.0328	0.0025	0.000712	3.8e-05	8.3	29.695
NDZ11	WD12A	17	17	15.2	541.714	14.7114		0.00151	0.00015	0.282549	2.5e-05	0.282534	3.21216	1.25662	1190.26		Iolite						0.282553	2.5e-05	1.46732	4.9e-05	1.88652	0.00011	0.0629	0.006	0.00143	0.00014	8.58	30.744
NDZ11	WD12A	18	18	15.2	832.205	26.6543		0.001159	5.4e-05	0.282528	2.6e-05	0.28251	8.92102	1.53475	1106.55		Iolite						0.282531	2.6e-05	1.4673	4.1e-05	1.88673	0.0001	0.047	0.0014	0.001062	4.7e-05	8.61	29.696
NDZ11	WD12A	19	19	15.2	700.776	19.7929		0.001016	8.3e-05	0.282676	1.9e-05	0.282663	11.3624	1.14625	862.224		Iolite						0.282679	1.9e-05	1.4673	4.1e-05	1.88666	0.00012	0.0373	0.0036	0.0009	7.5e-05	8.77	29.694
NDZ11	WD12A	20	20	15.2	733.414	20.9126		0.000743	5.1e-05	0.282542	2.5e-05	0.282532	7.46429	1.3731	1107.69		Iolite						0.282545	2.5e-05	1.46736	5.3e-05	1.88681	0.00011	0.0266	0.0017	0.000635	4.3e-05	9.26	29.694
NDZ11	WD12A	21	21	15.2	582.682	16.4404		0.00148	5.7e-05	0.282681	3e-05	0.282665	8.77775	1.43892	911.3		Iolite						0.282684	3e-05	1.46734	4.4e-05	1.88665	9.9e-05	0.0514	0.0029	0.001223	5e-05	9.3	29.695
NDZ11	WD12A	22	22	15.2	667.38	17.3509		0.000213	2.6e-05	0.282462	3.1e-05	0.282459	3.40982	1.49846	1280.88		Iolite						0.282465	3.1e-05	1.46733	5.3e-05	1.88682	9.4e-05	0.0085	0.001	0.000171	2.1e-05	11.5	29.694
NDZ11	WD12A	23	23	15.2	702.558	18.632		0.00321	0.00016	0.28255	2.9e-05	0.282508	5.91104	1.48443	1169.58		Iolite						0.282553	2.9e-05	1.46727	5.3e-05	1.8867	0.00013	0.1033	0.0059	0.00248	0.00012	10.28	29.692
NDZ11	WD12A	24	24	15.2	587.131	19.2682		0.001023	4e-06	0.282536	2.3e-05	0.282525	3.91784	1.23654	1187.53		Iolite						0.282539	2.3e-05	1.46729	5e-05	1.8867	0.00012	0.03359	0.00073	0.000767	3e-06	9.59	29.697
NDZ11	WD12A	25	25	15.2	207.033	6.11098		0.0046	0.00035	0.282873	3.7e-05	0.282855	7.09317	1.47629	700.895		Iolite						0.282875	3.7e-05	1.46727	7.4e-05	1.88671	0.00016	0.146	0.013	0.00336	0.00026	5.91	29.69
NDZ11	WD12A	26	26	15.2	577.722	15.4278		0.0015	0.00011	0.282445	1.9e-05	0.282429	0.306969	1.04777	1381.59		Iolite						0.282448	1.9e-05	1.46726	3.4e-05	1.88671	9.6e-05	0.043	0.0032	0.001063	7.9e-05	13.4	29.694
NDZ11	WD12A	28	28	15.2	626.903	18.2481		0.002266	9.5e-05	0.282621	3.9e-05	0.282594	7.27695	1.80545	1031.58		Iolite						0.282623	3.9e-05	1.4673	7.3e-05	1.88665	0.00013	0.0747	0.0035	0.001549	6.6e-05	6.28	29.693
NDZ11	WD12A	29	29	15.2	969.324	24.0772		0.001333	7.8e-05	0.282412	4.4e-05	0.282388	7.69805	2.13611	1286.62		Iolite						0.282414	4.4e-05	1.46734	7.3e-05	1.8866	0.00013	0.0372	0.0026	0.0009	5.3e-05	10.25	29.695
NDZ11	WD12A	30	30	15.2	806.538	19.8113		0.0041	0.0013	0.282529	6.9e-05	0.282467	6.81247	3.55522	1203.63		Iolite						0.282532	6.9e-05	1.46725	0.00012	1.88668	0.00026	0.124	0.043	0.00277	0.00087	8.6	11.462
NDZ11	WD12A	31	31	15.2	719.506	19.8488		0.00204	0.00023	0.282515	2.4e-05	0.282487	5.57864	1.38441	1201.93		Iolite						0.282517	2.4e-05	1.46737	4.8e-05	1.8868	0.00011	0.061	0.0088	0.00137	0.00015	12.86	27.589
NDZ11	WD12A	32	32	15.2	671.792	18.0831		0.00083	1.1e-05	0.282238	1.7e-05	0.282228	-4.70073	1.00446	1735.41		Iolite						0.28224	1.7e-05	1.46729	4e-05	1.88671	0.00011	0.02394	0.00023	0.000558	8e-06	10.24	29.694
NDZ11	WD12A	33	33	15.2	698.577	18.3275		0.000833	2e-05	0.282629	1.9e-05	0.282618	9.73483	1.08599	951.945		Iolite						0.282631	1.9e-05	1.46734	6.3e-05	1.88663	9.5e-05	0.02488	0.00089	0.000568	1.3e-05	9.04	29.695
NDZ11	WD12A	34	34	15.2	587.644	18.0683		0.000934	2.1e-05	0.282257	2.1e-05	0.282247	-5.91529	1.14706	1735.28		Iolite						0.282259	2.1e-05	1.46731	5.6e-05	1.88655	0.0001	0.02904	0.0009	0.000649	1.4e-05	10.68	29.692
NDZ11	WD12A	35	35	15.2	605.034	16.5141		0.000315	1e-06	0.282056	2e-05	0.282052	-12.4032	1.07638	2107.19		Iolite						0.282058	2e-05	1.46729	5.4e-05	1.8867	0.00011	0.01032	0.00014	0.000225	0	9.92	29.696
NDZ11	WD12A	36	36	15.2	964.063	28.9526		0.00106	0.00013	0.281531	2.3e-05	0.281512	-23.4625	1.53589	2993.52		Iolite						0.281533	2.3e-05	1.46735	9.8e-05	1.88667	0.00017	0.0314	0.0038	0.000777	9.4e-05	10.36	25.488
NDZ11	WD12A	37	37	15.2	2094.37	12.1752		0.00124	9.6e-05	0.281249	3.8e-05	0.281199	-8.65128	1.7593	3091.57		Iolite						0.281251	3.8e-05	1.46735	6.6e-05	1.88666	0.00015	0.0396	0.0044	0.00095	7.1e-05	9.43	29.694
NDZ11	WD12A	38	38	15.2	683.086	18.7589		0.00288	0.00043	0.282574	4.1e-05	0.282537	6.51401	2.04027	1120.01		Iolite						0.282576	4.1e-05	1.46741	0.00012	1.88655	0.00021	0.088	0.016	0.00231	0.00034	7.1	27.59
NDZ11	WD12A	39	39	15.2	645.657	16.6418		0.001331	2.4e-05	0.282661	2.2e-05	0.282645	9.48982	1.1501	922.566		Iolite						0.282663	2.2e-05	1.46734	5.1e-05	1.88677	0.00013	0.04605	0.00095	0.001122	2e-05	9.11	29.695
NDZ11	WD12A	40	40	15.2	571.76	16.0273		0.00202	0.00011	0.282642	2.6e-05	0.28262	6.95629	1.30273	1004.77		Iolite						0.282643	2.6e-05	1.46728	5.8e-05	1.88671	0.00012	0.0791	0.0045	0.001803	9.3e-05	7.69	29.691
NDZ11	WD12A	41	41	15.2	697.535	17.4673		0.000451	2.2e-05	0.28255	2.4e-05	0.282544	7.09152	1.24944	1099.4		Iolite						0.282549	2.4e-05	1.46735	4.6e-05	1.88676	0.00015	0.0271	0.0012	0.000642	3.1e-05	9.29	26.859
NDZ11	WD12A	42	42	15.2	891.194	23.6287		0.000429	1.1e-05	0.282473	2.2e-05	0.282466	8.69667	1.31498	1167.18		Iolite						0.282472	2.2e-05	1.46725	5.7e-05	1.8867	0.00011	0.02386	0.00075	0.000612	1.6e-05	9.34	29.694
NDZ11	WD12A	43	43	15.2	737.498	18.4811		0.000577	3e-06	0.282521	2.8e-05	0.282513	6.8923	1.40358	1143.04		Iolite						0.28252	2.8e-05	1.46729	6.3e-05	1.88675	0.00014	0.03466	0.00024	0.000822	4e-06	8.32	29.693
NDZ11	WD12A	44	44	15.2	2633.43	12.1625		0.001027	7.3e-05	0.281091	2.3e-05	0.281039	-1.77107	1.22684	3156.3		Iolite						0.28109	2.3e-05	1.46728	6.7e-05	1.88673	0.00011	0.0601	0.004	0.00146	0.0001	7.65	29.695
NDZ11	WD12A	45	45	15.2	561.632	15.1887		0.000949	4.4e-05	0.282263	2.1e-05	0.282253	-6.27678	1.09214	1734.5		Iolite						0.282262	2.1e-05	1.46725	5.6e-05	1.88669	0.00012	0.0572	0.003	0.001342	6.3e-05	11.53	29.692
NDZ11	WD12A	46	46	15.2	2029.53	14.3185		0.000378	1e-06	0.281143	2.2e-05	0.281128	-12.6799	1.11085	3256.15		Iolite						0.281142	2.2e-05	1.4673	4.6e-05	1.88686	0.00011	0.02288	0.00016	0.000531	2e-06	10.7	29.695
NDZ11	WD12A	48	48	15.2	1029.73	28.3974		0.000323	7e-06	0.282342	2.2e-05	0.282336	7.23039	1.42398	1361.88		Iolite						0.282341	2.2e-05	1.4673	5.3e-05	1.88677	0.00011	0.01816	0.00058	0.000444	9e-06	10.14	29.698
NDZ11	WD12A	49	49	15.2	887.832	23.8473		0.00038	1e-06	0.282383	2.5e-05	0.282377	5.46155	1.42063	1345.1		Iolite						0.282381	2.5e-05	1.46723	6.7e-05	1.88666	0.00013	0.0232	0.00021	0.000516	2e-06	8.29	28.708
NDZ11	WD12A	50	50	15.2	586.361	17.3483		0.000657	4.3e-05	0.282537	1.7e-05	0.28253	4.07933	1.00209	1177.87		Iolite						0.282535	1.7e-05	1.46726	6.2e-05	1.88679	0.00011	0.0395	0.003	0.000882	5.9e-05	8.6	29.694
NDZ11	WD12A	51	51	15.2	590.351	16.7309		0.000552	5.6e-05	0.282171	2.4e-05	0.282165	-8.75115	1.24242	1894.26		Iolite						0.282169	2.4e-05	1.46727	5.6e-05	1.88672	0.00018	0.0313	0.0028	0.000729	7.3e-05	7.58	29.695
NDZ11	WD12A	52	52	15.2	577.372	16.2695		0.000387	3e-06	0.282196	2.4e-05	0.282192	-8.08941	1.21246	1847.35		Iolite						0.282195	2.4e-05	1.46725	5.3e-05	1.88674	0.00011	0.02123	0.00034	0.000504	4e-06	10.23	29.697
NDZ11	WD12A	53	53	15.2	2522.1	14.6217		0.000285	6e-06	0.281177	2.4e-05	0.281163	0.0315152	1.20368	2969.11		Iolite						0.281175	2.4e-05	1.46733	5.8e-05	1.88691	0.00014	0.01416	0.00015	0.000364	8e-06	7.85	29.696
NDZ11	WD12A	54	54	15.2	595.342	14.4108		0.000223	4e-06	0.282183	1.7e-05	0.282181	-8.08548	0.925457	1861.48		Iolite						0.282181	1.7e-05	1.4673	4.6e-05	1.88681	0.0001	0.012448	9.6e-05	0.000279	4e-06	9.46	30.745
NDZ11	WD12A	55	55	15.2	572.551	14.4809		0.001147	1.8e-05	0.282664	3.2e-05	0.282652	8.08473	1.45495	942.018		Iolite						0.282662	3.2e-05	1.46727	6.3e-05	1.88682	8.5e-05	0.0633	0.0012	0.001407	2.2e-05	7.05	29.693
NDZ11	WD12A	56	56	15.2	594.603	16.8827		0.000544	2.4e-05	0.282341	2.3e-05	0.282335	-2.63437	1.19786	1558.87		Iolite						0.282339	2.3e-05	1.46727	5e-05	1.88664	0.00011	0.028	0.0011	0.000653	2.8e-05	10.54	29.693
NDZ11	WD12A	57	57	15.2	826.967	24.111		0.000695	6.3e-05	0.282548	2.1e-05	0.282537	9.77134	1.31433	1054.63		Iolite						0.282546	2.1e-05	1.46729	4.2e-05	1.88679	0.00011	0.0265	0.0023	0.000817	7.4e-05	8.9	29.692
NDZ11	WD12A	59	59	15.2	566.375	15.079		0.000856	1.4e-05	0.282658	2.8e-05	0.282649	7.84775	1.32758	950.314		Iolite						0.282656	2.8e-05	1.46731	5.8e-05	1.88667	8.1e-05	0.0406	0.0012	0.000962	1.7e-05	10.9	29.692
NDZ11	WD12A	60	60	15.2	671.638	17.7508		0.00135	0.00015	0.282125	2.2e-05	0.282108	-8.93884	1.23175	1969.44		Iolite						0.282123	2.2e-05	1.46729	6.3e-05	1.88681	0.00011	0.0668	0.008	0.00148	0.00016	9.66	29.691
NDZ11	WD12A	61	61	15.2	595.69	15.8054		0.000695	3.7e-05	0.282541	2.6e-05	0.282533	4.41173	1.2842	1166.82		Iolite						0.282539	2.6e-05	1.46732	6.3e-05	1.88679	0.0001	0.0339	0.0018	0.000746	3.9e-05	9.17	29.698
NDZ11	WD12A	62	62	15.2	760.203	20.7903		0.000616	2.4e-05	0.2825	2.4e-05	0.282491	6.63265	1.32387	1176.03		Iolite						0.282498	2.4e-05	1.46731	5.5e-05	1.88668	0.00014	0.0268	0.0011	0.000647	2.5e-05	10.17	29.697
NDZ11	WD12A	63	63	15.2	651.768	18.5895		0.00097	3.2e-05	0.282692	2.5e-05	0.28268	10.8767	1.30686	849.526		Iolite						0.28269	2.5e-05	1.46731	5.6e-05	1.88669	0.00015	0.0431	0.0013	0.000996	3.2e-05	8.4	29.694
NDZ11	WD12A	64	64	15.2	982.648	27.9854		0.000711	4.3e-05	0.281642	2.9e-05	0.281629	-18.892	1.67723	2760.6		Iolite						0.281639	2.9e-05	1.46737	5.3e-05	1.88696	0.00015	0.0304	0.002	0.000715	4.4e-05	9.66	29.694
NDZ11	WD12A	65	65	15.2	613.615	18.0479		0.000235	1e-06	0.282055	2e-05	0.282052	-12.2149	1.11161	2103.64		Iolite						0.282053	2e-05	1.4673	4.2e-05	1.88685	0.00013	0.009625	9.4e-05	0.000232	1e-06	9.69	29.696
NDZ11	WD12A	66	66	15.2	585.794	14.9093		0.000401	3e-06	0.282486	2e-05	0.282482	2.3608	1.04089	1273.49		Iolite						0.282483	2e-05	1.46724	5.6e-05	1.88666	0.00013	0.01627	0.00025	0.000388	3e-06	9.73	29.697
NDZ11	WD12A	67	67	15.2	686.208	18.28		0.001603	3.3e-05	0.282672	2.2e-05	0.282651	10.6334	1.18761	891.341		Iolite						0.282669	2.2e-05	1.46726	6.1e-05	1.88669	0.00011	0.06825	0.00081	0.001523	3e-05	7.91	29.694
NDZ11	WD12A	68	68	15.2	1137.15	29.4001		0.001219	3e-05	0.282369	2.4e-05	0.282343	9.92486	1.51999	1299.29		Iolite						0.282366	2.4e-05	1.4673	8.8e-05	1.88657	0.00015	0.043	0.00026	0.001144	2.7e-05	10.79	11.606
NDZ11	WD12A	69	69	15.2	588.852	17.1577		0.000751	2.9e-05	0.282502	2e-05	0.282494	2.85811	1.09743	1248.18		Iolite						0.282499	2e-05	1.46726	4.6e-05	1.8867	6.9e-05	0.0298	0.0016	0.000694	2.7e-05	9.85	29.693
NDZ11	WD12A	70	70	15.2	599.076	21.6985		0.000504	4.7e-05	0.282635	2.4e-05	0.282629	7.89111	1.3507	974.476		Iolite						0.282632	2.4e-05	1.46732	6.9e-05	1.88664	0.00012	0.0208	0.0019	0.000461	4.2e-05	7.68	29.698
NDZ11	WD12A	72	72	15.2	911.336	23.147		0.000656	5.9e-05	0.281515	2.5e-05	0.281504	-24.9376	1.43559	3031.87		Iolite						0.281512	2.5e-05	1.46737	6.4e-05	1.8867	0.0001	0.0228	0.0022	0.000594	5.4e-05	9.75	29.693
NDZ11	WD12A	73	73	15.2	879.822	22.4661		0.000853	8e-06	0.28243	2.9e-05	0.282416	6.66952	1.52843	1271.2		Iolite						0.282427	2.9e-05	1.46737	0.00012	1.88669	0.00014	0.03494	0.00048	0.000772	7e-06	13.21	9.2845
NDZ11	WD12A	74	74	15.2	534.156	14.1079		0.00053	0.00011	0.28255	4.9e-05	0.282545	3.43363	2.08717	1171.75		Iolite						0.282546	4.9e-05	1.46758	0.00031	1.88652	0.00028	0.0201	0.0032	0.00049	0.0001	8.5	18.131
NDZ11	WD12A	75	75	15.2	844.097	21.3972		0.000579	7.2e-05	0.282454	3e-05	0.282445	6.88605	1.58058	1230.06		Iolite						0.28245	3e-05	1.46735	0.00017	1.88682	0.00023	0.0151	0.0019	0.000531	6.6e-05	5.33	27.592
NDZ11	WD12A	76	76	15.2	596.253	16.1234		0.000532	6.8e-05	0.282334	1.9e-05	0.282328	-2.84096	1.05751	1571.67		Iolite						0.282331	1.9e-05	1.46734	5.3e-05	1.88673	9.4e-05	0.0249	0.0037	0.000494	6.4e-05	10.92	29.693
NDZ11	WD12A	77	77	15.2	954.134	25.2632		0.001256	6.9e-05	0.281793	2.5e-05	0.28177	-14.5201	1.48179	2500.15		Iolite						0.28179	2.5e-05	1.46733	6.2e-05	1.88666	9.3e-05	0.0508	0.0036	0.001185	6.3e-05	8.51	29.693
NDZ11	WD12A	78	78	15.2	237.401	6.57711		0.00182	0.00017	0.282641	2.3e-05	0.282633	-0.0920809	0.980205	1129.83		Iolite						0.282637	2.3e-05	1.46723	7.3e-05	1.88665	0.00012	0.0707	0.0077	0.00175	0.00016	9.32	30.742
NDZ11	WD12A	79	79	15.2	577.602	29.6031		0.000945	1.3e-05	0.282684	2.7e-05	0.282674	8.98036	1.60919	895.765		Iolite						0.282681	2.7e-05	1.46731	7.5e-05	1.88665	0.00013	0.03688	0.00075	0.000937	1e-05	6.2	29.695
NDZ11	WD12A	80	80	15.2	805.486	20.0587		0.000635	3e-06	0.282453	2e-05	0.282443	5.96214	1.15529	1250.3		Iolite						0.28245	2e-05	1.46727	5.5e-05	1.88684	0.00016	0.02752	0.00023	0.000648	2e-06	9.75	29.694
NDZ11	WD12A	81	81	15.2	782.161	28.4316		0.00141	0.00011	0.282555	2.3e-05	0.282534	8.65366	1.4903	1080.74		Iolite						0.282549	2.3e-05	1.46733	7.2e-05	1.88674	0.0001	0.0321	0.0026	0.000853	6.6e-05	9.21	29.694
NDZ11	WD12A	82	82	15.2	643.007	24.1475		0.00142	0.00011	0.282665	2.8e-05	0.282648	9.53598	1.56202	917.811		Iolite						0.28266	2.8e-05	1.46733	6.6e-05	1.88667	0.00011	0.0329	0.0033	0.000817	6.4e-05	12.28	29.697
NDZ11	WD12A	83	83	15.2	544.016	20.5189		0.00086	0.00012	0.282111	2.4e-05	0.282102	-12.0107	1.34375	2037.13		Iolite						0.282105	2.4e-05	1.46732	5.4e-05	1.88662	9.9e-05	0.0222	0.0025	0.000471	6.2e-05	10.4	29.694
NDZ11	WD12A	84	84	15.2	827.927	28.9375		0.00094	2.2e-05	0.282545	2.1e-05	0.28253	9.55091	1.39338	1067.77		Iolite						0.282539	2.1e-05	1.46733	5.5e-05	1.88674	0.00013	0.01708	0.00024	0.000493	1.1e-05	10.01	30.745
NDZ11	WD12A	85	85	15.2	585.973	22.0797		0.000723	8e-06	0.282283	1.7e-05	0.282275	-4.94886	1.09106	1680.4		Iolite						0.282277	1.7e-05	1.46727	4.7e-05	1.88673	0.0001	0.01541	0.00031	0.000361	5e-06	11.09	29.695
NDZ11	WD12A	86	86	15.2	591.886	25.5808		0.001983	6.9e-05	0.282319	1.6e-05	0.282297	-4.04059	1.13639	1634.77		Iolite						0.282313	1.6e-05	1.46728	5.9e-05	1.8867	9.6e-05	0.0419	0.0017	0.000949	3.5e-05	9.49	29.694
NDZ11	WD12A	88	88	15.2	959.656	34.3749		0.003328	9.4e-05	0.282255	2.7e-05	0.282195	0.643289	1.72186	1671.02		Iolite						0.282249	2.7e-05	1.46724	5.1e-05	1.88669	0.00011	0.0586	0.0018	0.001466	4.2e-05	10.1	28.642
NDZ11	WD12A	89	89	15.2	779.33	26.8957		0.00138	0.00014	0.28253	2.5e-05	0.28251	7.72235	1.54414	1130.6		Iolite						0.282524	2.5e-05	1.46731	5.9e-05	1.88691	9.6e-05	0.0235	0.0027	0.000587	5.9e-05	9.5	29.694
NDZ11	WD12A	92	92	15.2	625.313	21.3562		0.00354	0.00014	0.282435	2.8e-05	0.282393	0.126261	1.48213	1430.01		Iolite						0.282428	2.8e-05	1.46727	4.5e-05	1.88664	0.0001	0.0583	0.0022	0.001368	5.3e-05	10.65	29.695
NDZ11	WD12A	93	93	15.2	299.4	10.9966		0.00375	0.00012	0.282709	2.5e-05	0.282688	3.24111	1.12793	992.754		Iolite						0.282703	2.5e-05	1.46734	6e-05	1.88666	0.00014	0.0686	0.0019	0.001417	4.3e-05	7.17	28.642
NDZ11	WD12A	94	94	15.2	295.489	12.5066		0.002131	7e-05	0.282738	2.9e-05	0.282726	4.50701	1.30257	918.41		Iolite						0.282732	2.9e-05	1.46732	5.7e-05	1.88686	0.00015	0.0354	0.00086	0.000789	2.5e-05	6.99	29.695
NDZ11	WD12A	95	95	15.2	2869.43	13.5894		0.00259	0.00023	0.280847	2.4e-05	0.280704	-8.13737	1.60359	3686.75		Iolite						0.280841	2.4e-05	1.46727	5.6e-05	1.88669	0.00011	0.0427	0.0046	0.000948	8.2e-05	10.67	29.696
NDZ11	WD12A	96	96	15.2	762.423	27.5214		0.0027	8.8e-05	0.28261	1.9e-05	0.282571	9.51839	1.29166	1016.17		Iolite						0.282604	1.9e-05	1.46733	4.4e-05	1.88692	9.9e-05	0.0401	0.0015	0.000979	3.2e-05	10.83	29.695
NDZ11	WD12A	97	97	15.2	2715.67	14.042		0.00359	0.00016	0.280896	2e-05	0.280709	-11.5872	1.30452	3746.47		Iolite						0.280889	2e-05	1.46737	6.1e-05	1.88691	0.00012	0.0576	0.0028	0.001295	5.8e-05	9.71	29.692
NDZ11	WD12A	98	98	15.2	583.098	19.7385		0.00294	0.00021	0.282154	2.7e-05	0.282122	-10.4405	1.44512	1981.68		Iolite						0.282148	2.7e-05	1.46744	0.00018	1.88654	0.00023	0.0474	0.0038	0.001063	7.7e-05	10.4	22.336
NDZ11	WD12A	99	99	15.2	844.777	32.6858		0.00246	0.00022	0.282447	1.9e-05	0.282408	5.59203	1.48793	1302.86		Iolite						0.28244	1.9e-05	1.46728	5.2e-05	1.88673	8.4e-05	0.033	0.0024	0.000895	7.9e-05	10.13	29.697
NDZ11	WD12A	100	100	15.2	918.975	29.7889		0.00624	0.00019	0.282045	1.7e-05	0.281937	-9.41735	1.27196	2193.03		Iolite						0.282037	1.7e-05	1.46728	4.2e-05	1.88682	0.0001	0.0978	0.0027	0.0023	7.1e-05	10.81	29.689
NDZ11	WD12A	101	101	15.2	601.552	22.6613		0.00194	0.00039	0.281881	9.6e-05	0.281859	-19.3285	4.04129	2483.94		Iolite						0.281874	9.6e-05	1.46731	5.4e-05	1.88664	9.4e-05	0.0283	0.0059	0.00073	0.00015	10.5	29.696
NDZ11	WD12A	102	102	15.2	608.46	21.2786		0.000742	6e-06	0.281818	2.1e-05	0.28181	-20.9277	1.21357	2576.63		Iolite						0.281811	2.1e-05	1.46731	4.7e-05	1.88686	0.00011	0.011165	9.3e-05	0.000284	2e-06	11.38	29.694
NDZ11	WD12A	103	103	15.2	989.779	34.3553		0.0037	0.00024	0.281988	2.2e-05	0.281919	-8.45031	1.63738	2196.5		Iolite						0.281981	2.2e-05	1.46734	4.9e-05	1.88676	0.00013	0.0561	0.0048	0.00145	9.4e-05	10.69	29.691
NDZ11	WD12A	104	104	15.2	682.909	24.0975		0.00126	3.3e-05	0.28231	2.2e-05	0.282294	-2.10222	1.31756	1600.28		Iolite						0.282303	2.2e-05	1.46725	4.8e-05	1.88676	0.00012	0.02232	0.00071	0.000509	1.2e-05	10.21	30.745
NDZ11	WD12A	107	107	15.2	917.152	32.6502		0.00127	0.00015	0.282081	3e-05	0.282059	-5.12871	1.86986	1955.75		Iolite						0.282073	3e-05	1.46738	6.8e-05	1.88664	0.00018	0.0208	0.0016	0.000574	7.1e-05	8.8	22.334
NDZ11	WD12A	108	108	15.2	668.529	25.1056		0.000847	7.5e-05	0.282424	1.8e-05	0.282413	1.8073	1.22388	1371.22		Iolite						0.282416	1.8e-05	1.46733	6.5e-05	1.88687	0.00015	0.0162	0.0016	0.000397	3.4e-05	10.03	30.235
NDZ11	WD12A	109	109	15.2	614.873	21.6794		0.000651	1.3e-05	0.282442	2.3e-05	0.282434	1.34697	1.29868	1353.56		Iolite						0.282434	2.3e-05	1.46725	4.4e-05	1.88669	0.00011	0.01297	0.00026	0.000322	7e-06	10.65	29.698
NDZ11	WD12A	110	110	15.2	654.518	22.682		0.000409	1e-05	0.282562	2.2e-05	0.282557	6.57776	1.28884	1093.23		Iolite						0.282555	2.2e-05	1.46729	5.9e-05	1.88679	0.00011	0.00762	0.00024	0.00021	5e-06	10.95	29.695
NDZ11	WD12A	111	111	15.2	592.399	23.4588		0.001022	1.8e-05	0.282525	8.4e-05	0.282514	3.64367	3.49395	1207.13		Iolite						0.282517	8.4e-05	1.46776	0.00015	1.88585	0.00043	0.02017	0.00052	0.000545	1e-05	5.9	6.6318
NDZ11	WD12A	112	112	15.2	804.211	27.704		0.00194	0.00014	0.282508	2.6e-05	0.282479	7.18181	1.58941	1181.09		Iolite						0.282501	2.6e-05	1.46731	6.4e-05	1.88681	0.00011	0.0485	0.0037	0.0011	7.5e-05	7.96	29.695
NDZ11	WD12A	113	113	15.2	583.632	20.1583		0.000925	1.1e-05	0.282153	2.1e-05	0.282143	-9.68196	1.18863	1940.28		Iolite						0.282145	2.1e-05	1.46726	5.1e-05	1.88674	9.4e-05	0.02425	0.00025	0.000551	8e-06	11.54	29.694
NDZ11	WD12A	115	115	15.2	2066.31	15.9973		0.00183	0.00022	0.281564	2.7e-05	0.281492	1.08788	1.62077	2542.19		Iolite						0.281556	2.7e-05	1.46736	8.3e-05	1.88673	0.00019	0.0458	0.0033	0.00121	0.00015	10.1	25.49
NDZ11	WD12A	116	116	15.2	597.431	21.5764		0.000703	1.1e-05	0.282358	1.9e-05	0.28235	-2.03308	1.15266	1527.72		Iolite						0.282349	1.9e-05	1.46728	4.6e-05	1.88663	9.6e-05	0.02166	0.00039	0.000489	8e-06	9.1	29.693
NDZ11	WD12A	117	117	15.2	606.723	20.8774		0.000914	4.6e-05	0.282206	2.4e-05	0.282196	-7.29607	1.32592	1826.94		Iolite						0.282198	2.4e-05	1.4673	6.9e-05	1.8868	8.7e-05	0.0276	0.0012	0.000668	3.6e-05	10.75	29.696
NDZ11	WD12A	118	118	15.2	1029.78	36.8249		0.0015	0.00011	0.282308	2.7e-05	0.282279	5.21516	1.83514	1474.07		Iolite						0.2823	2.7e-05	1.46735	0.00011	1.88658	0.00015	0.04526	0.00089	0.001152	8.4e-05	8.23	25.491
NDZ11	WD12A	119	119	15.2	688.281	23.5953		0.00091	0.00016	0.282653	3e-05	0.282641	10.3229	1.65667	910.491		Iolite						0.282645	3e-05	1.46741	0.00018	1.88662	0.00017	0.0268	0.0046	0.00073	0.00013	11.5	21.284
NDZ11	WD12A	121	121	15.2	586.112	21.6081		0.000441	7e-06	0.282232	2.9e-05	0.282227	-6.6416	1.5092	1774.27		Iolite						0.282224	2.9e-05	1.46727	7.1e-05	1.88664	0.00016	0.01637	0.00027	0.000393	7e-06	10.43	24.439
Sample WD16A - East of Uweinat, Western Desert, Egypt (basement gneiss)
NDZ15	WD16A	6 (Core)	6	14	3048.02	12.1548		0.00144751	0.000140953	0.280803	3.2435e-05	0.280718	-3.42468	1.72614	3580.41		0.808212	1.00002		1.61039	0.0069054		0.280796	2.6e-05	1.46722	9.2e-05	1.88636	0.000156	0.060395	0.004825	0.001791	0.000172	4.27951	27	30
NDZ15	WD16A	16 (Core)	16	14	2553.29	13.41		0.00064172	4.64247e-05	0.280806	5.17698e-05	0.280775	-13.0617	2.23065	3694.84		0.808212	1.00002		1.61039	0.0069054		0.280799	4.8e-05	1.46722	6.7e-05	1.88645	0.000225	0.024077	0.002039	0.000794	5.6e-05	4.70517	27	30
NDZ15	WD16A	30 (Core)	30	14	2789.69	14.5528		0.00170694	9.07424e-05	0.28081	4.44533e-05	0.280719	-9.50578	2.08113	3695.33		0.808212	1.00002		1.61039	0.0069054		0.280803	4e-05	1.46734	0.000111	1.88655	0.000169	0.075411	0.004149	0.002112	0.000107	3.84834	28	30
NDZ15	WD16A	1 (Core)	1	14	3146.23	11.6109		0.000762144	5.23757e-05	0.280828	3.164e-05	0.280782	1.17298	1.50992	3415.21		0.808212	1.00002		1.61039	0.0069054		0.280821	2.5e-05	1.46724	5.9e-05	1.8865	9.9e-05	0.026087	0.002146	0.000943	6.3e-05	11.3336	30	30
NDZ15	WD16A	3 (Core)	3	14	3234.75	14.9763		0.00118646	3.75525e-05	0.280599	4.26558e-05	0.280525	-5.87241	1.94698	3861.27		0.808212	1.00002		1.61039	0.0069054		0.280592	3.8e-05	1.46736	8.6e-05	1.88654	0.000158	0.044092	0.001896	0.001468	4e-05	6.15565	29	30
NDZ15	WD16A	4 (Core)	4	14	2793.86	11.6045		0.00124869	2.34805e-05	0.280891	3.40627e-05	0.280824	-5.65521	1.52045	3493.77		0.808212	1.00002		1.61039	0.0069054		0.280884	2.8e-05	1.46732	0.000103	1.88676	0.000156	0.048486	0.001742	0.001545	1.5e-05	6.25244	28	30
NDZ15	WD16A	8 (Core)	8	14	2932.65	11.7407		0.00118888	4.91427e-05	0.280838	3.48874e-05	0.280771	-4.27033	1.60863	3532.07		0.808212	1.00002		1.61039	0.0069054		0.280831	2.9e-05	1.46729	9.1e-05	1.88686	0.000175	0.041675	0.001814	0.001471	5.6e-05	3.75389	28	30
NDZ15	WD16A	10 (Core)	10	14	2993.87	12.867		0.000467955	5.54727e-05	0.28087	3.74196e-05	0.280843	-0.256915	1.74688	3367.62		0.808212	1.00002		1.61039	0.0069054		0.280863	3.2e-05	1.46728	7.2e-05	1.88675	0.000172	0.01547	0.001877	0.000579	6.8e-05	5.69208	28	30
NDZ15	WD16A	12 (Core)	12	14	2965.33	15.4125		0.0023131	0.000169031	0.280868	4.8086e-05	0.280736	-4.73954	2.39634	3583.47		0.808212	1.00002		1.61039	0.0069054		0.280861	4.4e-05	1.46729	8.5e-05	1.88644	0.000182	0.080663	0.008308	0.002862	0.000204	5.01963	27	30
NDZ15	WD16A	13 (Core)	13	14	2923.69	15.5023		0.000547968	1.31123e-05	0.280818	3.40598e-05	0.280787	-3.90421	1.59916	3505.32		0.808212	1.00002		1.61039	0.0069054		0.280811	2.8e-05	1.46729	6.6e-05	1.88648	0.000115	0.01859	0.000932	0.000678	1.2e-05	6.64136	29	30
NDZ15	WD16A	15 (Core)	15	14	2931.36	11.7288		0.000994909	2.77275e-05	0.280918	3.32466e-05	0.280862	-1.06246	1.50844	3359.9		0.808212	1.00002		1.61039	0.0069054		0.280911	2.7e-05	1.46724	7.4e-05	1.88651	0.000153	0.035886	0.001284	0.001231	2.8e-05	6.83182	28	30
NDZ15	WD16A	18 (Core)	18	14	3217.33	12.3569		0.000598077	2.6842e-05	0.280761	3.57201e-05	0.280724	0.799515	1.62069	3493		0.808212	1.00002		1.61039	0.0069054		0.280754	3e-05	1.46741	7.1e-05	1.88657	0.000161	0.01997	0.000822	0.00074	3.1e-05	6.41415	30	30
NDZ15	WD16A	20 (Core)	20	14	2995.14	13.4604		0.00183787	5.68113e-05	0.280936	5.17732e-05	0.28083	-0.687237	2.26167	3391.63		0.808212	1.00002		1.61039	0.0069054		0.280929	4.8e-05	1.46726	5.9e-05	1.88666	0.000149	0.06648	0.000388	0.002274	6e-05	5.82784	30	30
NDZ15	WD16A	22 (Core)	22	14	3154.79	15.3634		0.000609392	7.25972e-05	0.280703	4.445e-05	0.280666	-2.75033	2.09938	3631.05		0.808212	1.00002		1.61039	0.0069054		0.280696	4e-05	1.46724	7.6e-05	1.88674	0.000141	0.020046	0.002389	0.000754	8.9e-05	4.47245	27	30
NDZ15	WD16A	24 (Core)	24	14	3081.7	14.9466		0.000174574	6.31749e-06	0.280834	4.17749e-05	0.280824	1.13199	1.85378	3364.86		0.808212	1.00002		1.61039	0.0069054		0.280827	3.7e-05	1.46741	7.5e-05	1.88664	0.000169	0.005789	0.00014	0.000216	7e-06	4.44609	29	30
NDZ15	WD16A	25 (Core)	25	14	3034.16	12.8858		0.000527762	2.95366e-05	0.28077	4.35543e-05	0.280739	-3.00196	1.91297	3546.68		0.808212	1.00002		1.61039	0.0069054		0.280763	3.9e-05	1.4674	8.3e-05	1.88666	0.000162	0.016623	0.000973	0.000653	3.5e-05	3.78818	27	30
NDZ15	WD16A	27 (Core)	27	14	3115.69	13.7143		0.000476037	8.8428e-05	0.280717	4.53525e-05	0.280688	-2.87748	2.12583	3606.12		0.808212	1.00002		1.61039	0.0069054		0.28071	4.1e-05	1.46742	6.3e-05	1.88661	0.000188	0.014463	0.003041	0.000589	0.000109	3.92194	29	30
NDZ15	WD16A	9 (Core)	9	14	2461.97	13.4353		0.0012301	0.000163654	0.280861	4.44548e-05	0.280803	-14.1863	2.15911	3681.69		0.808212	1.00002		1.61039	0.0069054		0.280854	4e-05	1.46725	6.9e-05	1.88672	0.000149	0.046474	0.008086	0.001522	0.000201	5.07492	30	30
NDZ15	WD16A	26 (Core)	26	14	2553.39	18.7225		0.00030308	2.47327e-05	0.280832	3.65666e-05	0.280817	-11.5455	1.77857	3614.28		0.808212	1.00002		1.61039	0.0069054		0.280825	3.1e-05	1.4673	5.9e-05	1.88653	0.00014	0.008712	0.000793	0.000375	3e-05	5.9522	27	30
NDZ15	WD16A	29 (Rim)	29	14	2404.39	15.519		0.00110563	8.43385e-05	0.280945	4.26667e-05	0.280894	-12.2909	2.00631	3534.78		0.808212	1.00002		1.61039	0.0069054		0.280938	3.8e-05	1.4674	6.6e-05	1.88655	0.000144	0.039302	0.004154	0.001368	0.000102	4.42343	28	30
NDZ15	WD16A	2 (Rim)	2	14	2684.63	12.102		0.00119292	2.9073e-05	0.280953	3.65711e-05	0.280892	-5.82034	1.629	3414.48		0.808212	1.00002		1.61039	0.0069054		0.280946	3.1e-05	1.46725	7.6e-05	1.88654	0.000182	0.039078	0.000418	0.001476	2.7e-05	6.81736	27	30
NDZ15	WD16A	5 (Rim)	5	14	2705.42	12.2061		0.00108462	1.81273e-05	0.280929	3.48909e-05	0.280873	-6.00297	1.5528	3441		0.808212	1.00002		1.61039	0.0069054		0.280922	2.9e-05	1.4673	5.4e-05	1.8867	0.000125	0.038543	0.001138	0.001342	6e-06	7.02187	29	30
NDZ15	WD16A	7 (Rim)	7	14	2524.02	11.1565		0.000558475	4.93197e-05	0.280889	3.00874e-05	0.280862	-10.6384	1.41208	3542.44		0.808212	1.00002		1.61039	0.0069054		0.280882	2.3e-05	1.46738	6.1e-05	1.8865	0.000153	0.019372	0.002271	0.000691	6e-05	5.40842	27	30
NDZ15	WD16A	11 (Rim)	11	14	2572.4	12.7492		0.000972279	4.25853e-05	0.28095	3.16452e-05	0.280902	-8.07974	1.49084	3444.78		0.808212	1.00002		1.61039	0.0069054		0.280943	2.5e-05	1.46732	7.5e-05	1.88666	0.000172	0.029698	0.001485	0.001203	4.9e-05	6.51983	29	30
NDZ15	WD16A	14 (Rim)	14	14	2955.19	14.505		0.000759719	5.4727e-05	0.280824	3.91421e-05	0.280781	-3.38697	1.83999	3503.24		0.808212	1.00002		1.61039	0.0069054		0.280817	3.4e-05	1.46743	7.3e-05	1.88662	0.000154	0.024467	0.001228	0.00094	6.6e-05	5.99855	27	30
NDZ15	WD16A	17 (Rim)	17	14	2730.5	11.567		0.0011808	8.3815e-05	0.28087	3.91437e-05	0.280808	-7.71129	1.81228	3552.29		0.808212	1.00002		1.61039	0.0069054		0.280863	3.4e-05	1.46735	8e-05	1.88624	0.000129	0.043802	0.003461	0.001461	0.000101	4.30376	28	30
NDZ15	WD16A	19 (Rim)	19	14	2711.07	13.4676		0.00121636	6.44718e-05	0.28096	3.82814e-05	0.280897	-5.01518	1.78728	3392.8		0.808212	1.00002		1.61039	0.0069054		0.280953	3.3e-05	1.46727	6.5e-05	1.8866	0.000165	0.03785	0.001269	0.001505	7.6e-05	7.3485	27	30
NDZ15	WD16A	21 (Rim)	21	14	2586.67	12.5575		0.0005019	3.80462e-05	0.280923	3.16441e-05	0.280898	-7.88625	1.48307	3445.92		0.808212	1.00002		1.61039	0.0069054		0.280916	2.5e-05	1.46732	7.5e-05	1.88655	0.000162	0.016936	0.000948	0.000621	4.6e-05	7.59403	28	30
NDZ15	WD16A	23 (Rim)	23	14	2661.79	13.9652		0.00099006	4.34422e-05	0.280909	3.24394e-05	0.280858	-7.53466	1.55174	3487.59		0.808212	1.00002		1.61039	0.0069054		0.280902	2.6e-05	1.46725	8.2e-05	1.88634	0.000167	0.030831	0.001995	0.001225	5e-05	5.31562	27	30
NDZ15	WD16A	28 (Rim)	28	14	3187.89	14.5276		0.000553625	8.29183e-05	0.280737	4.35533e-05	0.280703	-0.645389	2.07331	3545.98		0.808212	1.00002		1.61039	0.0069054		0.28073	3.9e-05	1.46731	0.000109	1.88651	0.000208	0.016018	0.00276	0.000685	0.000102	4.77623	28	30
Sample WD18A - Wadi Wassa, Western Desert, Egypt (sandstone bedrock)
NDZ11	WD18A	1	1	15.2	935.344	23.3343		0.000865	9e-06	0.282505	1.6e-05	0.28249	10.5461	1.0886	1099.71		Iolite						0.28249	1.6e-05	1.46726	6.2e-05	1.88676	8e-05	0.04214	0.00056	0.001045	1.1e-05	12.38	27.958
NDZ11	WD18A	2	2	15.2	905.165	30.8901		0.000807	2e-05	0.281648	1.9e-05	0.281634	-20.4528	1.36731	2784.23		Iolite						0.281633	1.9e-05	1.46734	5.3e-05	1.88678	0.00011	0.04147	0.00081	0.000976	2.5e-05	10.73	28.64
NDZ11	WD18A	3	3	15.2	766.39	18.2215		0.001032	3.5e-05	0.281806	1.9e-05	0.281791	-18.0266	1.08952	2542.85		Iolite						0.281791	1.9e-05	1.46725	6.2e-05	1.8869	0.00013	0.0532	0.002	0.001248	4.2e-05	11.11	29.69
NDZ11	WD18A	4	4	15.2	602.217	19.3384		0.0008	0.00015	0.282394	2.5e-05	0.282385	-0.691795	1.37223	1456.96		Iolite						0.282379	2.5e-05	1.46732	6.8e-05	1.88673	0.00022	0.0435	0.0087	0.00097	0.00018	7.4	29.696
NDZ11	WD18A	7	7	15.2	1848.95	11.0437		0.000844	7.7e-05	0.281343	2.1e-05	0.281313	-10.2855	1.09097	2983.07		Iolite						0.281329	2.1e-05	1.46729	4.4e-05	1.88684	0.00012	0.042	0.0046	0.001023	9.4e-05	13.68	28.67
NDZ11	WD18A	8	8	15.2	876.167	22.2264		0.000769	6e-05	0.282497	3.5e-05	0.282484	9.01197	1.76827	1137.29		Iolite						0.282482	3.5e-05	1.46735	7.9e-05	1.8868	0.00017	0.0388	0.0023	0.000932	7.2e-05	12.64	16.026
NDZ11	WD18A	9	9	15.2	933.732	22.1785		0.0005	7e-06	0.281984	2e-05	0.281975	-7.72424	1.20802	2111.85		Iolite						0.281969	2e-05	1.46731	5.3e-05	1.88681	9.9e-05	0.02389	0.00056	0.000607	9e-06	11.22	28.641
NDZ11	WD18A	10	10	15.2	614.124	18.1139		0.000156	4e-06	0.282636	1.6e-05	0.282634	8.40266	0.974503	957.982		Iolite						0.282621	1.6e-05	1.46733	2.9e-05	1.88678	0.00011	0.00771	0.00026	0.00019	5e-06	12.61	28.642
NDZ11	WD18A	11	11	15.2	563.552	14.132		0.000395	6.1e-05	0.282466	2e-05	0.282462	1.1606	1.0457	1322.55		Iolite						0.282452	2e-05	1.46732	4.3e-05	1.88674	8.7e-05	0.0203	0.0034	0.00048	7.4e-05	11.74	28.641
NDZ11	WD18A	12	12	15.2	604.959	18.0309		0.000298	2e-06	0.282069	2.3e-05	0.282066	-11.9377	1.21704	2081.52		Iolite						0.282055	2.3e-05	1.46735	5.4e-05	1.88687	0.00011	0.01532	0.00025	0.000362	2e-06	12.14	29.695
NDZ11	WD18A	13	13	15.2	494.436	11.865		0.001029	1.2e-05	0.282526	1.5e-05	0.282516	1.54161	0.793369	1245.49		Iolite						0.282512	1.5e-05	1.46727	4e-05	1.88677	8e-05	0.05644	0.00096	0.001251	1.4e-05	14.66	28.64
NDZ11	WD18A	14	14	15.2	594.851	14.8733		0.000137	4e-06	0.282156	1.8e-05	0.282154	-9.01844	0.972022	1912.6		Iolite						0.282142	1.8e-05	1.46727	4.7e-05	1.8868	0.00011	0.00722	0.00033	0.000167	5e-06	12.14	29.696
NDZ11	WD18A	15	15	15.2	1016.76	22.7839		0.000891	1.2e-05	0.281783	1.4e-05	0.281766	-13.2608	1.00745	2481.16		Iolite						0.281769	1.4e-05	1.4673	4.8e-05	1.88682	8.8e-05	0.0426	0.00061	0.001085	1.5e-05	16.57	29.694
NDZ11	WD18A	16	16	15.2	960.824	21.9459		0.000491	4.6e-05	0.281921	2.6e-05	0.281912	-9.34668	1.44161	2222.54		Iolite						0.281907	2.6e-05	1.46729	5.1e-05	1.88675	0.0001	0.0254	0.0026	0.000598	5.5e-05	11.24	28.646
NDZ11	WD18A	17	17	15.2	620.53	16.5856		0.000845	3.1e-05	0.28252	2.9e-05	0.28251	4.15379	1.4043	1201.37		Iolite						0.282506	2.9e-05	1.46728	6.4e-05	1.88677	0.00014	0.0448	0.0016	0.001028	3.8e-05	9.91	29.693
NDZ11	WD18A	18	18	15.2	611.33	14.9235		0.000843	4.3e-05	0.2825	2.1e-05	0.28249	3.24444	1.08919	1244.76		Iolite						0.282486	2.1e-05	1.46725	5e-05	1.88681	0.00012	0.0449	0.0025	0.001027	5.2e-05	11.54	28.642
NDZ11	WD18A	19	19	15.2	990.724	24.0839		0.00068	2e-05	0.281924	2.7e-05	0.281911	-8.69806	1.50551	2210.84		Iolite						0.28191	2.7e-05	1.46733	6.3e-05	1.8868	9.7e-05	0.0332	0.0011	0.000828	2.5e-05	10.39	28.642
NDZ11	WD18A	20	20	15.2	1761.15	17.7712		0.000499	3.8e-05	0.281432	1.9e-05	0.281415	-8.68849	1.12359	2826.51		Iolite						0.281418	1.9e-05	1.46733	5.9e-05	1.8868	0.0001	0.0262	0.0019	0.000608	4.6e-05	10.61	29.694
NDZ11	WD18A	21	21	15.2	633.005	16.7884		0.000238	1.2e-05	0.282294	1.7e-05	0.282291	-3.31962	0.982502	1627.75		Iolite						0.28228	1.7e-05	1.46728	5.7e-05	1.88667	0.00012	0.01305	0.0006	0.00029	1.4e-05	12.4	28.641
NDZ11	WD18A	22	22	15.2	1857.56	13.6489		0.001033	4.4e-05	0.281727	2.4e-05	0.28169	3.30745	1.21372	2251.7		Iolite						0.281714	2.4e-05	1.46724	4.2e-05	1.88664	0.00011	0.0551	0.0021	0.001259	5.3e-05	10.63	28.643
NDZ11	WD18A	23	23	15.2	605.162	15.9027		0.000458	1.3e-05	0.282314	1.5e-05	0.282309	-3.32212	0.889468	1605.54		Iolite						0.2823	1.5e-05	1.46727	5.2e-05	1.88675	8.3e-05	0.02222	0.00069	0.000559	1.6e-05	13	29.696
NDZ11	WD18A	24	24	15.2	612.84	14.7076		0.000443	4e-06	0.282583	1.6e-05	0.282578	6.37996	0.895178	1070.47		Iolite						0.28257	1.6e-05	1.46724	5.4e-05	1.88665	0.0001	0.02123	0.0003	0.000541	5e-06	12.94	28.646
NDZ11	WD18A	25	25	15.2	644.172	16.7294		0.000613	1.4e-05	0.282396	1.9e-05	0.282389	0.381222	1.04902	1431.02		Iolite						0.282383	1.9e-05	1.46733	5.2e-05	1.88665	0.00011	0.03063	0.00074	0.000748	1.7e-05	10.05	29.695
NDZ11	WD18A	26	26	15.2	528.809	13.3308		0.00199	0.00016	0.28249	1.6e-05	0.28247	0.677398	0.906029	1321.49		Iolite						0.282477	1.6e-05	1.46728	4.4e-05	1.88667	0.00012	0.1079	0.0082	0.00243	0.0002	10.84	29.691
NDZ11	WD18A	27	27	15.2	2758.56	12.6625		0.000732	1e-05	0.281145	2.1e-05	0.281106	3.55832	1.05804	2971.49		Iolite						0.281132	2.1e-05	1.4673	5.7e-05	1.88685	0.00013	0.03427	0.00071	0.000894	1.2e-05	10.2	28.644
NDZ11	WD18A	28	28	15.2	2674.89	11.8268		0.000994	3.8e-05	0.281173	2.4e-05	0.281122	2.15066	1.19342	2979.13		Iolite						0.28116	2.4e-05	1.46729	6.8e-05	1.88669	0.00014	0.0482	0.0014	0.001214	4.6e-05	10.67	30.232
NDZ11	WD18A	29	29	15.2	969.729	22.7672		0.000377	6e-06	0.282024	1.7e-05	0.282017	-5.4237	1.1168	2014.15		Iolite						0.282011	1.7e-05	1.46725	3.8e-05	1.88674	0.00012	0.01819	0.00019	0.00046	8e-06	14.38	29.691
NDZ11	WD18A	30	30	15.2	894.425	23.4537		0.000826	1.1e-05	0.282056	2.3e-05	0.282042	-6.24411	1.33949	1998.98		Iolite						0.282043	2.3e-05	1.46727	4.1e-05	1.88674	0.0001	0.04108	0.00094	0.001009	1.4e-05	12.33	28.644
NDZ11	WD18A	31	31	15.2	836.064	19.6926		0.001372	1.6e-05	0.282489	2e-05	0.282467	7.50473	1.14528	1188.94		Iolite						0.282476	2e-05	1.4673	4.6e-05	1.88678	9.6e-05	0.06872	0.00037	0.001675	1.9e-05	11.65	29.692
NDZ11	WD18A	32	32	15.2	980.687	22.8731		0.000763	5.2e-05	0.281835	2.2e-05	0.281821	-12.1296	1.32113	2390.71		Iolite						0.281822	2.2e-05	1.46729	4e-05	1.88666	0.00012	0.0383	0.003	0.000931	6.4e-05	10.57	28.646
NDZ11	WD18A	33	33	15.2	760.704	20.4794		0.000505	1e-05	0.282108	1.9e-05	0.282101	-7.18566	1.13344	1943.89		Iolite						0.282095	1.9e-05	1.46731	3.6e-05	1.88676	8.3e-05	0.02601	0.00028	0.000617	1.2e-05	11.52	28.643
NDZ11	WD18A	34	34	15.2	727.168	17.2539		0.000494	4e-05	0.281743	2.8e-05	0.281736	-20.8536	1.39445	2665.93		Iolite						0.281731	2.8e-05	1.46737	7.2e-05	1.88677	0.00019	0.0233	0.0009	0.000603	4.9e-05	9.64	30.745
NDZ11	WD18A	35	35	15.2	633.852	15.5026		0.000445	6e-06	0.282471	1.7e-05	0.282466	2.87996	0.949226	1283.34		Iolite						0.282458	1.7e-05	1.46725	3.8e-05	1.88682	0.00011	0.02269	0.00061	0.000543	7e-06	11.97	28.646
NDZ11	WD18A	36	36	15.2	611.219	15.1292		0.000398	6e-06	0.282483	1.9e-05	0.282478	2.82116	1.01194	1268.32		Iolite						0.282471	1.9e-05	1.46731	5.4e-05	1.88666	0.00011	0.01989	0.00027	0.000486	8e-06	11.57	29.694
NDZ11	WD18A	37	37	15.2	581.983	14.4152		0.000239	1e-06	0.282011	2.1e-05	0.282008	-14.4802	1.0655	2203.03		Iolite						0.281998	2.1e-05	1.4673	5.9e-05	1.88677	0.00012	0.01332	8.4e-05	0.000291	2e-06	11.19	28.646
NDZ11	WD18A	38	38	15.2	940.167	23.8781		0.000681	3e-05	0.281768	1.9e-05	0.281756	-15.3489	1.22213	2534.27		Iolite						0.281755	1.9e-05	1.46728	3.5e-05	1.8868	0.00013	0.0318	0.0015	0.000831	3.6e-05	11.28	28.643
NDZ11	WD18A	39	39	15.2	103.072	2.9141		0.000852	1.7e-05	0.282848	2.7e-05	0.282846	4.4631	1.01948	765.225		Iolite						0.282836	2.7e-05	1.46731	5.3e-05	1.88682	0.0001	0.0483	0.0011	0.001039	2.1e-05	10.35	28.645
NDZ11	WD18A	41	41	15.2	951.262	24.0831		0.000838	6.3e-05	0.281624	2.9e-05	0.281609	-20.3059	1.60015	2812.56		Iolite						0.281612	2.9e-05	1.46725	4.1e-05	1.88685	9.2e-05	0.0416	0.0037	0.001021	7.7e-05	10.79	29.693
NDZ11	WD18A	42	42	15.2	638.699	14.881		2.8e-05	0	0.282184	1.6e-05	0.282184	-6.99845	0.901266	1836.03		Iolite						0.282172	1.6e-05	1.46729	4.5e-05	1.88682	7.4e-05	0.002073	2.6e-05	3.4e-05	0	16.34	29.695
NDZ11	WD18A	43	43	15.2	624.962	15.8596		0.000762	3.1e-05	0.28239	1.9e-05	0.282381	-0.317923	1.03507	1454.46		Iolite						0.282378	1.9e-05	1.46728	5.9e-05	1.88667	9.2e-05	0.0371	0.0012	0.000928	3.8e-05	11.95	29.693
NDZ11	WD18A	44	44	15.2	2091.49	13.0869		0.000585	4e-06	0.281523	1.7e-05	0.2815	1.94804	0.90838	2515.85		Iolite						0.281511	1.7e-05	1.46726	5.8e-05	1.88668	8.1e-05	0.02781	0.00013	0.000712	5e-06	10.77	29.692
NDZ11	WD18A	45	45	15.2	777.366	18.7353		0.001615	4.6e-05	0.282566	2.3e-05	0.282542	8.83315	1.24247	1066.77		Iolite						0.282554	2.3e-05	1.46733	5.1e-05	1.88675	7.6e-05	0.0709	0.0027	0.001964	5.6e-05	12.8	28.644
NDZ11	WD18A	46	46	15.2	862.238	21.524		0.000493	5.3e-05	0.282125	2.3e-05	0.282117	-4.31764	1.32597	1866.96		Iolite						0.282113	2.3e-05	1.46732	4.9e-05	1.88679	0.0001	0.0247	0.0032	0.000599	6.4e-05	10.2	28.644
NDZ11	WD18A	47	47	15.2	957.52	22.5349		0.000452	2.9e-05	0.282067	2e-05	0.282059	-4.2214	1.23171	1938.12		Iolite						0.282056	2e-05	1.46731	3.7e-05	1.88674	0.0001	0.0222	0.0014	0.000549	3.5e-05	12.31	29.699
NDZ11	WD18A	48	48	15.2	1007.27	22.9319		0.000662	1e-05	0.282068	2e-05	0.282055	-3.2146	1.22589	1922.59		Iolite						0.282056	2e-05	1.4673	6.2e-05	1.88687	7.4e-05	0.03451	0.00069	0.000803	1.2e-05	13.62	28.642
NDZ11	WD18A	49	49	15.2	580.042	18.3172		0.000661	1.8e-05	0.282319	1.9e-05	0.282312	-3.78067	1.08375	1610.84		Iolite						0.282307	1.9e-05	1.46731	3.6e-05	1.88685	9.5e-05	0.03392	0.00074	0.000802	2.2e-05	9.5	28.643
NDZ11	WD18A	50	50	15.2	731.163	18.9298		0.001163	7.5e-05	0.282039	2.6e-05	0.282023	-10.6067	1.37044	2108.68		Iolite						0.282027	2.6e-05	1.46731	7.5e-05	1.88684	0.00015	0.0622	0.0037	0.001408	9e-05	10.78	29.164
NDZ11	WD18A	51	51	15.2	618.82	16.8162		0.00027	3e-06	0.282102	1.6e-05	0.282099	-10.4488	0.943024	2010.57		Iolite						0.28209	1.6e-05	1.46731	5.7e-05	1.88671	9.3e-05	0.01348	0.00022	0.000326	3e-06	12.58	28.643
NDZ11	WD18A	52	52	15.2	605.686	14.3149		6.7e-05	0	0.282576	1.9e-05	0.282575	6.12476	0.994552	1078.97		Iolite						0.282564	1.9e-05	1.46727	4.2e-05	1.88678	0.0001	0.003946	5.9e-05	8.1e-05	1e-06	13.33	29.696
NDZ11	WD18A	53	53	15.2	491.794	12.379		0.001127	5.2e-05	0.282495	1.7e-05	0.282485	0.354614	0.887903	1309.68		Iolite						0.282484	1.7e-05	1.46732	3.8e-05	1.88666	9.9e-05	0.0617	0.0037	0.001361	6.3e-05	12.48	29.692
NDZ11	WD18A	54	54	15.2	850.028	22.5956		0.000916	1.1e-05	0.282088	2.4e-05	0.282073	-6.14072	1.35373	1957.74		Iolite						0.282077	2.4e-05	1.46727	5.8e-05	1.88674	9.5e-05	0.04635	0.00067	0.001105	1.3e-05	9.08	28.644
NDZ11	WD18A	55	55	15.2	555.659	15.8672		0.000534	2.5e-05	0.28258	2.2e-05	0.282574	4.97016	1.13973	1103.11		Iolite						0.282569	2.2e-05	1.46733	5.3e-05	1.88673	9.9e-05	0.02566	0.00097	0.000644	3.1e-05	10.14	29.695
NDZ11	WD18A	56	56	15.2	822.659	21.6866		0.000554	5e-06	0.28246	2.5e-05	0.282451	6.63567	1.37115	1226.62		Iolite						0.282449	2.5e-05	1.46729	3.5e-05	1.88677	0.00012	0.02532	0.00011	0.000667	5e-06	10.34	28.644
NDZ11	WD18A	57	57	15.2	602.073	15.6003		0.00069	6e-06	0.282393	1.7e-05	0.282385	-0.686267	0.948313	1456.53		Iolite						0.282382	1.7e-05	1.46725	5.1e-05	1.88672	0.00012	0.03389	0.00051	0.00083	8e-06	11	28.644
NDZ11	WD18A	58	58	15.2	597.727	15.4371		0.00082	3.6e-05	0.282187	1.7e-05	0.282178	-8.1282	0.955308	1865.74		Iolite						0.282176	1.7e-05	1.4673	5.6e-05	1.88679	8.8e-05	0.04	0.0014	0.000985	4.3e-05	12.95	29.695
NDZ11	WD18A	60	60	15.2	599.89	15.1345		0.000654	2.6e-05	0.282477	1.6e-05	0.28247	2.25446	0.91126	1290.82		Iolite						0.282466	1.6e-05	1.46727	4.9e-05	1.88681	7.1e-05	0.0304	0.0013	0.000783	3.2e-05	15.58	28.644
NDZ11	WD18A	61	61	15.2	597.728	23.0976		0.000399	2e-06	0.282162	1.9e-05	0.282158	-8.84586	1.18682	1905.37		Iolite						0.282154	1.9e-05	1.46726	4e-05	1.88676	0.0001	0.020941	7.2e-05	0.000476	2e-06	11.19	29.698
NDZ11	WD18A	62	62	15.2	895.542	32.8319		0.000489	2e-06	0.282066	2.1e-05	0.282058	-5.66347	1.47775	1967.89		Iolite						0.282058	2.1e-05	1.46724	5.4e-05	1.88679	0.0001	0.0243	0.00026	0.000584	3e-06	10.29	29.695
NDZ11	WD18A	63	63	15.2	585.015	21.907		0.000323	6e-06	0.282516	2.2e-05	0.282512	3.43613	1.26976	1212.76		Iolite						0.282508	2.2e-05	1.46728	5.8e-05	1.88654	0.00012	0.01576	0.00035	0.000386	7e-06	9.25	29.693
NDZ11	WD18A	65	65	15.2	961.302	34.5176		0.00105	6.5e-05	0.282029	3.3e-05	0.28201	-5.86795	1.97081	2031.84		Iolite						0.282021	3.3e-05	1.46735	6.5e-05	1.88678	0.00014	0.0548	0.0041	0.001256	7.8e-05	7.39	29.693
NDZ11	WD18A	66	66	15.2	973.097	35.0641		0.000793	2.1e-05	0.28191	2e-05	0.281895	-9.65911	1.49893	2249.46		Iolite						0.281903	2e-05	1.46735	6.7e-05	1.88685	0.00011	0.0396	0.0013	0.00095	2.5e-05	9.46	29.694
NDZ11	WD18A	67	67	15.2	627.782	24.103		0.001106	6.6e-05	0.28214	2.6e-05	0.282127	-9.2528	1.47385	1951.78		Iolite						0.282133	2.6e-05	1.46733	6.3e-05	1.88669	0.00014	0.0544	0.0033	0.001324	7.9e-05	8.24	29.692
NDZ11	WD18A	68	68	15.2	1749.7	13.1277		0.000593	3.3e-05	0.281285	2e-05	0.281265	-14.2782	1.0462	3119.04		Iolite						0.281277	2e-05	1.46728	4.4e-05	1.88678	9.3e-05	0.0306	0.0016	0.00071	3.9e-05	13.13	29.692
NDZ11	WD18A	69	69	15.2	3158.58	10.7588		0.002017	9e-05	0.28101	3e-05	0.280887	5.22403	1.50465	3208.75		Iolite						0.281002	3e-05	1.46728	5.5e-05	1.88664	0.00012	0.1048	0.0043	0.00242	0.00011	7.86	29.692
NDZ11	WD18A	70	70	15.2	850.754	31.155		0.000611	4.5e-05	0.282001	2.3e-05	0.281991	-9.03387	1.53294	2117.54		Iolite						0.281993	2.3e-05	1.46729	5.4e-05	1.88666	0.00011	0.0306	0.0026	0.000732	5.4e-05	8.26	29.694
NDZ11	WD18A	71	71	15.2	745.64	27.6188		0.000961	1.2e-05	0.282488	3.1e-05	0.282475	5.71311	1.71037	1215.62		Iolite						0.28248	3.1e-05	1.46732	5.6e-05	1.88671	0.00016	0.05155	0.00077	0.001151	1.4e-05	6.95	29.692
NDZ11	WD18A	72	72	15.2	1026.33	38.1828		0.001177	6.5e-05	0.281645	2.2e-05	0.281622	-18.1373	1.66142	2754.12		Iolite						0.281637	2.2e-05	1.46724	4.9e-05	1.88666	0.00014	0.0589	0.0026	0.00141	7.8e-05	9.1	29.691
NDZ11	WD18A	74	74	15.2	612.634	23.1758		0.000248	3e-06	0.282178	2.2e-05	0.282175	-7.88652	1.29782	1864.29		Iolite						0.28217	2.2e-05	1.46723	4.4e-05	1.88659	7.5e-05	0.01263	0.00012	0.000297	4e-06	11.17	29.697
NDZ11	WD18A	75	75	15.2	985.253	35.7113		0.000665	1e-05	0.281742	2.5e-05	0.28173	-15.2599	1.686	2565.15		Iolite						0.281735	2.5e-05	1.46725	4e-05	1.88665	0.00011	0.03412	0.0003	0.000797	1.2e-05	10.77	29.697
NDZ11	WD18A	76	76	15.2	625.484	23.871		0.000388	1.2e-05	0.282325	1.9e-05	0.28232	-2.4524	1.20925	1573.57		Iolite						0.282318	1.9e-05	1.46729	6.4e-05	1.88682	0.00011	0.02095	0.00086	0.000465	1.4e-05	10.13	29.696
NDZ11	WD18A	77	77	15.2	1006.6	37.0461		0.000546	5.3e-05	0.28202	2.6e-05	0.28201	-4.85265	1.78556	2012.29		Iolite						0.282013	2.6e-05	1.46727	6.9e-05	1.88668	0.00011	0.0269	0.0031	0.000654	6.4e-05	8.68	29.695
NDZ11	WD18A	78	78	15.2	1005.21	37.0052		0.000604	2.6e-05	0.281699	2.3e-05	0.281688	-16.2997	1.65699	2637.56		Iolite						0.281692	2.3e-05	1.46722	5.9e-05	1.88677	0.00011	0.0293	0.0012	0.000723	3.1e-05	10.05	29.696
NDZ11	WD18A	79	79	15.2	645.741	26.1445		0.000257	6e-06	0.282217	2.5e-05	0.282214	-5.76998	1.47223	1773.73		Iolite						0.28221	2.5e-05	1.46733	6e-05	1.88685	0.00011	0.01216	0.00024	0.000308	7e-06	7.53	29.691
NDZ11	WD18A	80	80	15.2	967.657	38.1455		0.000656	5.6e-05	0.282407	1.7e-05	0.282395	7.92262	1.48929	1272.73		Iolite						0.2824	1.7e-05	1.46728	5.5e-05	1.88661	0.00011	0.0314	0.0027	0.000785	6.8e-05	9.95	29.694
NDZ11	WD18A	81	81	15.2	668.86	24.2647		0.000602	4.9e-05	0.282601	2.5e-05	0.282593	8.19233	1.44562	1014.35		Iolite						0.282594	2.5e-05	1.46726	5.4e-05	1.8866	0.00015	0.0287	0.0027	0.00072	5.9e-05	9.39	29.696
NDZ11	WD18A	83	83	15.2	631.798	24.2654		0.000868	7.3e-05	0.282114	2.2e-05	0.282104	-9.986	1.34285	1995.4		Iolite						0.282107	2.2e-05	1.46727	5.4e-05	1.88666	9.9e-05	0.0447	0.0039	0.001039	8.8e-05	9.65	29.691
NDZ11	WD18A	85	85	15.2	667.28	25.1807		0.000784	8e-06	0.282583	2.3e-05	0.282573	7.43894	1.373	1055.33		Iolite						0.282576	2.3e-05	1.4673	7.1e-05	1.88692	0.00015	0.04191	0.0001	0.000937	9e-06	8.02	29.691
NDZ11	WD18A	86	86	15.2	560.584	21.9147		0.000502	9e-06	0.282285	2.5e-05	0.28228	-5.35393	1.37388	1682.52		Iolite						0.282279	2.5e-05	1.46734	5.5e-05	1.88684	0.00015	0.02578	0.00072	0.0006	1.1e-05	7.9	29.693
NDZ11	WD18A	87	87	15.2	613.869	22.7999		0.000974	1.7e-05	0.282184	2.3e-05	0.282173	-7.9433	1.3197	1868.41		Iolite						0.282178	2.3e-05	1.46728	4.5e-05	1.8868	0.00012	0.0489	0.0015	0.001163	2.1e-05	10.96	29.69
NDZ11	WD18A	88	88	15.2	670.609	28.1068		0.000197	3.6e-05	0.281917	2.9e-05	0.281915	-15.8122	1.67271	2346.19		Iolite						0.281911	2.9e-05	1.46727	6.6e-05	1.88674	0.00013	0.009	0.0022	0.000235	4.4e-05	10.67	29.179
NDZ11	WD18A	89	89	15.2	644.898	24.4973		0.000317	5e-06	0.282237	2.1e-05	0.282233	-5.10631	1.29233	1736.32		Iolite						0.282231	2.1e-05	1.46725	4.3e-05	1.88662	0.00013	0.01572	0.00014	0.000378	7e-06	10.43	29.695
NDZ11	WD18A	90	90	15.2	1848.97	15.0062		0.000283	8e-06	0.28151	2e-05	0.2815	-3.65375	1.06394	2624.13		Iolite						0.281504	2e-05	1.46725	6.2e-05	1.88668	0.00014	0.01255	0.00038	0.000337	1e-05	9.3	29.694
NDZ11	WD18A	91	91	15.2	1185.38	42.3406		0.000138	2e-06	0.282121	3.3e-05	0.282118	3.0501	2.13307	1720.37		Iolite						0.282115	3.3e-05	1.46729	6.7e-05	1.8867	0.00011	0.007666	9.3e-05	0.000165	3e-06	7.28	29.692
NDZ11	WD18A	92	92	15.2	2064.48	13.9339		0.000815	7.6e-05	0.281502	1.7e-05	0.28147	0.264392	1.02654	2585.46		Iolite						0.281496	1.7e-05	1.46725	3.5e-05	1.88675	0.00012	0.0422	0.0042	0.000971	9.1e-05	10.69	29.693
NDZ11	WD18A	93	93	15.2	647.057	24.6191		0.000495	1.5e-05	0.282115	2.3e-05	0.282109	-9.45538	1.36721	1978.31		Iolite						0.282109	2.3e-05	1.4673	5.8e-05	1.88686	7.2e-05	0.0253	0.00066	0.000589	1.8e-05	8.89	29.692
NDZ11	WD18A	94	94	15.2	747.689	30.1437		0.000373	4e-06	0.282301	2.7e-05	0.282296	-0.572561	1.63151	1567.49		Iolite						0.282295	2.7e-05	1.46731	6.2e-05	1.88673	0.00012	0.01894	0.00032	0.000444	5e-06	8.23	29.697
NDZ11	WD18A	95	95	15.2	994.326	38.9739		0.001164	1.1e-05	0.282008	1.7e-05	0.281986	-5.96292	1.46358	2063.53		Iolite						0.282002	1.7e-05	1.46728	5.3e-05	1.88676	7.4e-05	0.06212	0.00043	0.001385	1.3e-05	10.7	29.695
NDZ11	WD18A	96	96	15.2	1030.53	37.9686		0.000324	3e-06	0.281644	2.1e-05	0.281638	-17.4927	1.59913	2722.43		Iolite						0.281638	2.1e-05	1.46723	4.7e-05	1.88664	0.0001	0.01603	0.00016	0.000385	4e-06	10.71	29.696
NDZ11	WD18A	97	97	15.2	605.769	25.1231		0.000261	4e-06	0.282441	2.1e-05	0.282438	1.26797	1.30652	1350.62		Iolite						0.282435	2.1e-05	1.4673	5.5e-05	1.88672	0.00014	0.012	0.00028	0.00031	5e-06	7.29	29.695
NDZ11	WD18A	98	98	15.2	745.79	27.9616		0.000608	3e-06	0.28234	2.2e-05	0.282331	0.649599	1.40075	1498.04		Iolite						0.282335	2.2e-05	1.46726	6.1e-05	1.88674	0.00012	0.0307	0.00037	0.000723	4e-06	11.18	29.692
NDZ11	WD18A	99	99	15.2	274.609	11.1161		0.0019	4e-05	0.2827	2.6e-05	0.28269	2.76719	1.16206	999.357		Iolite						0.282695	2.6e-05	1.46726	5e-05	1.88672	0.00017	0.1063	0.0017	0.002255	4.7e-05	8.02	29.691
NDZ11	WD18A	100	100	15.2	655.695	26.8927		0.000502	7e-06	0.28212	2.2e-05	0.282114	-9.08985	1.37872	1965.05		Iolite						0.282115	2.2e-05	1.46729	5e-05	1.8867	0.0001	0.02463	0.00039	0.000596	9e-06	9.87	29.696
NDZ11	WD18A	101	101	15.2	546.431	22.7002		0.000268	3.1e-05	0.282258	2.1e-05	0.282255	-6.538	1.26121	1736.81		Iolite						0.282252	2.1e-05	1.46729	5.5e-05	1.88675	0.00011	0.0135	0.0015	0.000318	3.7e-05	10.41	29.695
NDZ11	WD18A	102	102	15.2	625.795	24.247		0.000782	3.5e-05	0.282455	3.1e-05	0.282446	1.99385	1.6464	1326.29		Iolite						0.28245	3.1e-05	1.46726	5.9e-05	1.88674	0.00013	0.0335	0.0018	0.000928	4.1e-05	6.98	29.696
NDZ11	WD18A	103	103	15.2	624.388	24.3035		0.000339	4e-06	0.282336	2.5e-05	0.282332	-2.06689	1.4287	1551.27		Iolite						0.282331	2.5e-05	1.46733	5.4e-05	1.88676	8.5e-05	0.01584	0.00033	0.000401	5e-06	9.32	29.695
NDZ11	WD18A	104	104	15.2	788.852	30.9046		0.00152	5.7e-05	0.282405	1.8e-05	0.282382	3.42691	1.3359	1378.25		Iolite						0.2824	1.8e-05	1.46723	6.3e-05	1.88663	0.00015	0.0897	0.0046	0.0018	6.7e-05	7.08	30.747
NDZ11	WD18A	105	105	15.2	718.247	32.7586		0.000778	7.5e-05	0.282277	2.7e-05	0.282266	-2.27345	1.71586	1638.19		Iolite						0.282272	2.7e-05	1.46736	6e-05	1.88676	0.00012	0.039	0.0034	0.000921	8.9e-05	6.46	29.695
NDZ11	WD18A	106	106	15.2	992.499	37.2099		0.00104	4.8e-05	0.281852	2.4e-05	0.281833	-11.4494	1.70114	2362.93		Iolite						0.281848	2.4e-05	1.46731	4.5e-05	1.88679	0.00011	0.0515	0.003	0.001231	5.7e-05	10.61	29.694
NDZ11	WD18A	107	107	15.2	1034.4	38.0139		0.0009	1.9e-05	0.282418	2e-05	0.2824	9.62981	1.56382	1231.85		Iolite						0.282414	2e-05	1.46726	4.3e-05	1.88669	0.00013	0.0372	0.001	0.001065	2.3e-05	10.05	29.694
NDZ11	WD18A	108	108	15.2	1056.65	39.3625		0.000422	2.6e-05	0.282393	1.9e-05	0.282385	9.57386	1.57683	1253.13		Iolite						0.282388	1.9e-05	1.46729	5.7e-05	1.88681	0.00011	0.0168	0.001	0.000499	3e-05	10.88	29.695
NDZ11	WD18A	109	109	15.2	1058.45	40.6057		0.001138	3e-05	0.281883	3e-05	0.28186	-8.97071	1.97638	2279.87		Iolite						0.281878	3e-05	1.46733	6.6e-05	1.88694	0.00012	0.0617	0.0012	0.001345	3.5e-05	7.26	29.695
NDZ11	WD18A	110	110	15.2	999.759	36.4862		0.001186	8.9e-05	0.282453	2.4e-05	0.282431	9.91299	1.71218	1187.74		Iolite						0.282449	2.4e-05	1.46727	7.2e-05	1.88679	0.00014	0.0586	0.0043	0.0014	0.00011	11.89	29.221
NDZ11	WD18A	111	111	15.2	789.915	33.3859		0.000858	5e-05	0.282581	4.3e-05	0.282568	10.0337	2.28684	1009.68		Iolite						0.282576	4.3e-05	1.46735	6.3e-05	1.88657	0.00014	0.0464	0.0032	0.001014	5.9e-05	6.22	29.695
NDZ11	WD18A	113	113	15.2	646.6	25.5823		0.0017	0.0002	0.282415	2.6e-05	0.282394	0.639481	1.55761	1418.59		Iolite						0.282411	2.6e-05	1.4673	4.7e-05	1.88672	8.6e-05	0.086	0.011	0.00201	0.00024	8.19	29.692
NDZ11	WD18A	114	114	15.2	659.364	25.7154		0.000311	2.1e-05	0.282133	1.8e-05	0.282129	-8.4642	1.22072	1933.47		Iolite						0.282129	1.8e-05	1.46733	4.2e-05	1.88677	8.5e-05	0.0149	0.001	0.000368	2.5e-05	12.93	29.695
NDZ11	WD18A	115	115	15.2	2606.43	12.8484		0.000734	6e-06	0.281139	1.8e-05	0.281102	-0.157246	0.94604	3047.7		Iolite						0.281135	1.8e-05	1.46731	3.6e-05	1.88677	9.8e-05	0.03731	0.00039	0.000868	7e-06	10.81	29.693
NDZ11	WD18A	116	116	15.2	685.37	25.2648		0.000582	9e-06	0.282637	2.5e-05	0.282629	9.84219	1.45007	935.141		Iolite						0.282633	2.5e-05	1.46727	5.1e-05	1.88666	8.8e-05	0.02207	0.00022	0.000688	1e-05	11.26	29.693
NDZ11	WD18A	117	117	15.2	621.994	24.7191		0.000499	9.4e-05	0.282343	1.8e-05	0.282337	-1.93861	1.22617	1542.22		Iolite						0.282339	1.8e-05	1.46734	5.1e-05	1.8868	7.3e-05	0.0256	0.005	0.00059	0.00011	10.31	29.697
NDZ11	WD18A	118	118	15.2	1958.29	17.0582		0.000278	1.2e-05	0.281327	1.3e-05	0.281317	-7.6413	0.86923	2927.97		Iolite						0.281323	1.3e-05	1.4673	4.3e-05	1.88674	8.5e-05	0.01353	0.00069	0.000328	1.4e-05	13.73	29.694
NDZ11	WD18A	119	119	15.2	619.848	25.451		0.000577	1.5e-05	0.282157	2.3e-05	0.28215	-8.60495	1.38368	1909.71		Iolite						0.282153	2.3e-05	1.46729	6.7e-05	1.88682	0.00014	0.02697	0.00092	0.000682	1.8e-05	9.86	29.694
NDZ11	WD18A	120	120	15.2	991.237	38.374		0.001149	4.2e-05	0.282099	2.9e-05	0.282078	-2.79543	1.89771	1886.58		Iolite						0.282095	2.9e-05	1.46731	5.9e-05	1.88673	9.3e-05	0.0586	0.0018	0.001358	4.9e-05	9.53	29.691
NDZ11	WD18A	121	121	15.2	557.521	22.6922		0.000233	1.7e-05	0.281602	2.3e-05	0.2816	-29.5046	1.32617	3002.51		Iolite						0.281598	2.3e-05	1.46728	5.6e-05	1.88674	0.00012	0.0113	0.00097	0.000275	2.1e-05	9.94	29.696
Sample N7-17S - White Nile, Murchison Falls, Uganda (modern river sand)
NDZ05	N7-17S	29	29	6	588.218	16.7199		0.000531924	7.62444e-05	0.281375	5.59212e-05	0.281369	-36.977	2.37974	3428.81		0.948171	1.00003		14.3293	0.0184196		0.281366	2.1e-05	1.46723	6.9e-05	1.88675	0.000118	0.01882	0.000441	0.000561	2e-06	10.2189	27	30
NDZ05	N7-17S	8	8	6	629.423	18.4445		0.000492101	7.91864e-05	0.281481	5.71333e-05	0.281475	-32.2972	2.46541	3209.1		0.948171	1.00003		14.3293	0.0184196		0.281472	2.4e-05	1.46725	7.2e-05	1.88682	0.000138	0.016888	0.001601	0.000519	3.8e-05	8.81586	27	30
NDZ05	N7-17S	60	60	6	920.814	29.4197		0.000538561	8.29222e-05	0.281419	5.52089e-05	0.28141	-28.058	2.66325	3207.55		0.948171	1.00003		14.3293	0.0184196		0.28141	1.9e-05	1.46722	6.1e-05	1.88687	0.000134	0.021706	0.000956	0.000568	3.2e-05	7.81765	27	30
NDZ05	N7-17S	2	2	6	967.474	29.1355		0.000439951	6.46262e-05	0.281395	5.52047e-05	0.281387	-27.8072	2.64999	3230.48		0.948171	1.00003		14.3293	0.0184196		0.281386	1.9e-05	1.46727	6.7e-05	1.88682	8.5e-05	0.01837	0.000755	0.000464	1.5e-05	13.8894	29	30
NDZ05	N7-17S	108	108	6	628.628	25.0985		0.000509168	7.90175e-05	0.281622	5.63463e-05	0.281616	-27.3287	2.58499	2940.16		0.948171	1.00003		14.3293	0.0184196		0.281613	2.2e-05	1.46718	7.2e-05	1.8869	0.00017	0.019496	0.00049	0.000537	3.2e-05	11.0358	27	30
NDZ05	N7-17S	58	58	6	974.325	31.4313		0.000420988	6.12195e-05	0.281432	5.75524e-05	0.281424	-26.3307	2.78322	3156.33		0.948171	1.00003		14.3293	0.0184196		0.281423	2.5e-05	1.46726	5.7e-05	1.88682	0.000177	0.015358	0.000156	0.000444	1.1e-05	8.30171	30	30
NDZ05	N7-17S	95	95	6	939.877	32.8606		0.00066846	9.60152e-05	0.281477	5.4563e-05	0.281465	-25.6605	2.72437	3093.24		0.948171	1.00003		14.3293	0.0184196		0.281468	1.7e-05	1.46712	5.9e-05	1.88692	0.00011	0.025376	0.000762	0.000705	7e-06	8.46995	27	30
NDZ05	N7-17S	117	117	6	614.395	22.2663		0.000631482	9.84841e-05	0.281686	5.71676e-05	0.281679	-25.427	2.55682	2825.97		0.948171	1.00003		14.3293	0.0184196		0.281677	2.4e-05	1.46722	6.2e-05	1.88687	0.000135	0.02671	0.001201	0.000666	4.1e-05	7.30004	29	30
NDZ05	N7-17S	11	11	6	962.909	27.2714		0.000396335	5.68631e-05	0.281516	5.9413e-05	0.281509	-23.5927	2.75306	2999.65		0.948171	1.00003		14.3293	0.0184196		0.281507	2.9e-05	1.46727	6.4e-05	1.88673	0.000168	0.016572	0.000159	0.000418	3e-06	9.20869	30	30
NDZ05	N7-17S	74	74	6	943.34	33.5178		0.000846716	0.00012992	0.281545	5.8936e-05	0.28153	-23.2864	2.91255	2967.73		0.948171	1.00003		14.3293	0.0184196		0.281536	2.8e-05	1.46726	3.8e-05	1.88681	0.000118	0.033679	0.002589	0.000893	4.9e-05	7.45803	30	30
NDZ05	N7-17S	111	111	6	971.917	33.8955		0.00224811	0.000324708	0.28163	6.04325e-05	0.281589	-20.5548	3.07627	2842.32		0.948171	1.00003		14.3293	0.0184196		0.281621	3.1e-05	1.4671	5.5e-05	1.88697	0.000142	0.09169	0.001596	0.002371	4.3e-05	6.9555	28	30
NDZ05	N7-17S	6	6	6	988.952	33.5162		0.00115961	0.000167038	0.281698	5.71696e-05	0.281676	-17.0649	2.87363	2666.31		0.948171	1.00003		14.3293	0.0184196		0.281689	2.4e-05	1.46732	7e-05	1.88689	0.000143	0.044787	0.000644	0.001223	1.8e-05	7.58521	28	30
NDZ05	N7-17S	116	116	6	3028.25	10.4803		0.00487075	0.000856175	0.280645	5.9273e-05	0.280361	-16.6015	4.10514	4261.06		0.948171	1.00003		14.3293	0.0184196		0.280636	2.9e-05	1.46726	7.9e-05	1.88683	0.000125	0.239028	0.019869	0.005137	0.000523	7.25604	28	30
NDZ05	N7-17S	18	18	6	2774.29	16.9493		0.000737677	0.00010581	0.280576	5.92619e-05	0.280537	-16.3412	2.70069	4044.9		0.948171	1.00003		14.3293	0.0184196		0.280567	2.9e-05	1.46729	8.6e-05	1.8868	9.3e-05	0.030558	0.000734	0.000778	5e-06	9.48452	29	30
NDZ05	N7-17S	32	32	6	800.785	25.2999		0.000854302	0.000122474	0.281863	5.46306e-05	0.28185	-15.1611	2.55941	2413.61		0.948171	1.00003		14.3293	0.0184196		0.281854	1.7e-05	1.46721	6.3e-05	1.88674	0.000137	0.040904	0.00122	0.000901	4e-06	8.0556	27	30
NDZ05	N7-17S	10	10	6	2542.19	18.488		0.00040961	5.86941e-05	0.280761	5.65993e-05	0.280741	-14.5155	2.5431	3763.19		0.948171	1.00003		14.3293	0.0184196		0.280752	2.3e-05	1.46717	6.4e-05	1.88667	0.000189	0.018083	0.00043	0.000432	0	8.93488	29	30
NDZ05	N7-17S	26	26	6	619.817	20.6112		0.000529079	7.58665e-05	0.282004	6.04917e-05	0.281998	-14.004	2.63067	2206.86		0.948171	1.00003		14.3293	0.0184196		0.281995	3.1e-05	1.46731	7.2e-05	1.88678	0.000149	0.022327	0.000347	0.000558	3e-06	5.75505	27	30
NDZ05	N7-17S	12	12	6	2641.32	14.3294		0.000149811	2.15504e-05	0.280737	5.65952e-05	0.280729	-12.6073	2.38723	3741.09		0.948171	1.00003		14.3293	0.0184196		0.280728	2.3e-05	1.46728	8.2e-05	1.88662	0.000113	0.006427	0.00025	0.000158	2e-06	9.43536	27	30
NDZ05	N7-17S	72	72	6	669.416	25.035		0.00091214	0.000148796	0.282028	5.64152e-05	0.282017	-12.227	2.61523	2148.63		0.948171	1.00003		14.3293	0.0184196		0.282019	2.2e-05	1.46728	5.8e-05	1.88673	0.000105	0.043347	0.004392	0.000962	7.5e-05	7.92214	27	30
NDZ05	N7-17S	9	9	6	2409.45	15.5606		0.000515805	7.42993e-05	0.280918	5.74672e-05	0.280894	-12.1705	2.52372	3532.41		0.948171	1.00003		14.3293	0.0184196		0.280909	2.5e-05	1.46721	8.1e-05	1.88664	0.00014	0.022787	0.000593	0.000544	8e-06	8.21478	27	30
NDZ05	N7-17S	27	27	6	802.697	43.6264		0.000503479	7.22009e-05	0.281955	5.90025e-05	0.281947	-11.6717	3.10158	2224.08		0.948171	1.00003		14.3293	0.0184196		0.281946	2.8e-05	1.4673	8e-05	1.88692	0.000162	0.02152	0.000619	0.000531	3e-06	5.34227	27	30
NDZ05	N7-17S	37	37	6	2473.53	12.1638		0.000266436	3.8751e-05	0.280881	5.98063e-05	0.280868	-11.5926	2.47461	3552.86		0.948171	1.00003		14.3293	0.0184196		0.280872	3e-05	1.46723	6.1e-05	1.88688	0.000133	0.011909	0.000481	0.000281	7e-06	8.67078	28	30
NDZ05	N7-17S	79	79	6	2519.85	10.3872		0.00224337	0.000511048	0.280952	6.24753e-05	0.280844	-11.3852	3.32961	3578.89		0.948171	1.00003		14.3293	0.0184196		0.280943	3.5e-05	1.46717	4.9e-05	1.88682	0.000123	0.114286	0.018562	0.002366	0.000419	9.04088	30	30
NDZ05	N7-17S	7	7	6	2510.65	18.7087		0.000289192	4.19673e-05	0.280867	5.83568e-05	0.280853	-11.2683	2.58189	3565.3		0.948171	1.00003		14.3293	0.0184196		0.280858	2.7e-05	1.46724	6.7e-05	1.88684	9.5e-05	0.012383	0.000103	0.000305	7e-06	8.25983	30	30
NDZ05	N7-17S	71	71	6	802.104	27.8413		0.000909296	0.000208743	0.281988	5.60259e-05	0.281974	-10.7331	2.71216	2172.1		0.948171	1.00003		14.3293	0.0184196		0.281979	2.1e-05	1.46726	4.9e-05	1.88667	0.000134	0.044886	0.007467	0.000959	0.000172	7.30787	27	30
NDZ05	N7-17S	55	55	6	2589.92	11.4257		0.000933948	0.000136436	0.280867	5.79008e-05	0.280821	-10.5663	2.562	3591.42		0.948171	1.00003		14.3293	0.0184196		0.280858	2.6e-05	1.46724	5.9e-05	1.8867	0.000112	0.044829	0.000342	0.000985	2.8e-05	7.51551	27	30
NDZ05	N7-17S	34	34	6	2504.34	14.9434		0.000287296	4.65869e-05	0.280903	5.79068e-05	0.280889	-10.1311	2.48612	3499.61		0.948171	1.00003		14.3293	0.0184196		0.280894	2.6e-05	1.46724	8.1e-05	1.88687	0.000137	0.012487	0.000521	0.000303	2.3e-05	7.84173	27	30
NDZ05	N7-17S	118	118	6	804.394	38.7249		0.000789826	0.000113192	0.282003	5.99851e-05	0.281991	-10.0872	3.04295	2138.45		0.948171	1.00003		14.3293	0.0184196		0.281994	3e-05	1.4673	8.5e-05	1.88683	0.000142	0.034518	0.00064	0.000833	2e-06	4.71471	27	30
NDZ05	N7-17S	80	80	6	2498.48	21.7305		0.000373579	7.15063e-05	0.280914	5.6625e-05	0.280896	-10.0226	2.63946	3489.12		0.948171	1.00003		14.3293	0.0184196		0.280905	2.3e-05	1.46721	7e-05	1.88685	0.000114	0.016173	0.00186	0.000394	5e-05	7.01114	28	30
NDZ05	N7-17S	90	90	6	846.847	34.2868		0.000510116	7.3102e-05	0.281976	6.04872e-05	0.281968	-9.94946	2.94946	2164.72		0.948171	1.00003		14.3293	0.0184196		0.281967	3.1e-05	1.46725	6.3e-05	1.88677	0.000154	0.024162	0.000432	0.000538	1e-06	6.76937	27	30
NDZ05	N7-17S	73	73	6	2520.73	11.1727		0.000417195	6.0684e-05	0.280907	5.62251e-05	0.280887	-9.83171	2.36269	3496.78		0.948171	1.00003		14.3293	0.0184196		0.280898	2.2e-05	1.46733	4.8e-05	1.88688	0.000134	0.019957	0.000734	0.00044	1.1e-05	7.5776	27	30
NDZ05	N7-17S	61	61	6	2552.17	10.0848		0.000461759	6.7305e-05	0.280892	6.30319e-05	0.280869	-9.7157	2.59249	3515.82		0.948171	1.00003		14.3293	0.0184196		0.280883	3.6e-05	1.46723	6.2e-05	1.88686	0.000134	0.019112	0.000708	0.000487	1.3e-05	7.80261	28	30
NDZ05	N7-17S	93	93	6	2554.66	13.0927		0.000292037	4.22316e-05	0.280884	5.98067e-05	0.28087	-9.64742	2.50525	3514.18		0.948171	1.00003		14.3293	0.0184196		0.280875	3e-05	1.46724	6.8e-05	1.88684	0.000161	0.012646	0.000212	0.000308	6e-06	8.28873	27	30
NDZ05	N7-17S	44	44	6	756.111	24.8442		0.00143174	0.000211917	0.28206	5.95005e-05	0.28204	-9.45556	2.75476	2065.25		0.948171	1.00003		14.3293	0.0184196		0.282051	2.9e-05	1.4673	7.7e-05	1.88683	0.000162	0.057266	0.000392	0.00151	5.6e-05	5.77885	27	30
NDZ05	N7-17S	105	105	6	2586.55	11.7467		0.00103161	0.000151712	0.280907	5.79074e-05	0.280856	-9.39239	2.59551	3526.17		0.948171	1.00003		14.3293	0.0184196		0.280898	2.6e-05	1.46726	6.5e-05	1.88699	9e-05	0.049546	0.000454	0.001088	3.6e-05	7.03049	30	30
NDZ05	N7-17S	75	75	6	2599.59	11.5049		0.00148673	0.000256678	0.280926	5.83664e-05	0.280852	-9.22673	2.79104	3527.81		0.948171	1.00003		14.3293	0.0184196		0.280917	2.7e-05	1.46728	6.4e-05	1.88685	0.000127	0.07255	0.006558	0.001568	0.000151	7.39873	27	30
NDZ05	N7-17S	16	16	6	2573.27	20.1193		0.000252213	4.03816e-05	0.280885	5.79038e-05	0.280873	-9.10997	2.59914	3500.45		0.948171	1.00003		14.3293	0.0184196		0.280876	2.6e-05	1.46724	7.3e-05	1.8868	0.000146	0.011257	0.000674	0.000266	1.9e-05	7.88737	27	30
NDZ05	N7-17S	67	67	6	2556.17	10.7182		0.00058597	9.41843e-05	0.280918	5.62269e-05	0.280889	-8.91478	2.41144	3476.31		0.948171	1.00003		14.3293	0.0184196		0.280909	2.2e-05	1.46724	5.9e-05	1.8868	0.000123	0.02657	0.00157	0.000618	4.5e-05	9.90934	29	30
NDZ05	N7-17S	88	88	6	2563.7	10.7891		0.000797412	0.000114656	0.280925	5.66269e-05	0.280886	-8.86195	2.4622	3479.53		0.948171	1.00003		14.3293	0.0184196		0.280916	2.3e-05	1.46724	6.5e-05	1.88702	0.000141	0.034069	0.000902	0.000841	1e-05	7.63644	27	30
NDZ05	N7-17S	114	114	6	2614.17	12.1369		0.000592607	9.33918e-05	0.280887	5.70341e-05	0.280857	-8.69386	2.47589	3511.11		0.948171	1.00003		14.3293	0.0184196		0.280878	2.4e-05	1.46715	6e-05	1.88679	0.000165	0.028643	0.002408	0.000625	4.1e-05	7.29888	27	30
NDZ05	N7-17S	56	56	6	2590.68	10.7562		0.000481671	8.01626e-05	0.280897	5.74637e-05	0.280873	-8.68312	2.43486	3491.67		0.948171	1.00003		14.3293	0.0184196		0.280888	2.5e-05	1.46717	7.1e-05	1.88677	9.4e-05	0.023656	0.002941	0.000508	4.3e-05	8.25132	27	30
NDZ05	N7-17S	40	40	6	2520.74	12.6265		0.000503479	8.63275e-05	0.280946	5.93214e-05	0.280922	-8.59248	2.55002	3430.64		0.948171	1.00003		14.3293	0.0184196		0.280937	2.9e-05	1.46717	4.3e-05	1.88681	0.00014	0.021327	0.001744	0.000531	5e-05	8.59601	27	30
NDZ05	N7-17S	119	119	6	2615.74	14.5439		0.000895073	0.000129044	0.28091	5.62256e-05	0.280865	-8.37883	2.56377	3495.57		0.948171	1.00003		14.3293	0.0184196		0.280901	2.2e-05	1.4672	8.5e-05	1.8869	0.000157	0.038613	0.000574	0.000944	1.5e-05	6.4955	28	30
NDZ05	N7-17S	120	120	6	2505.52	14.6755		0.000205753	2.95438e-05	0.280949	5.88394e-05	0.280939	-8.32853	2.48476	3404.31		0.948171	1.00003		14.3293	0.0184196		0.28094	2.8e-05	1.46725	8.1e-05	1.88684	0.000153	0.009011	8.2e-05	0.000217	2e-06	8.18691	30	30
NDZ05	N7-17S	83	83	6	2616.4	19.5961		0.000221872	3.20181e-05	0.280881	5.51158e-05	0.28087	-8.19461	2.47503	3486.28		0.948171	1.00003		14.3293	0.0184196		0.280872	1.9e-05	1.46721	4.7e-05	1.88678	0.000111	0.009546	0.000254	0.000234	4e-06	7.08988	28	30
NDZ05	N7-17S	35	35	6	2589.24	14.3756		0.000196271	2.8521e-05	0.280898	5.66223e-05	0.280888	-8.17717	2.39993	3463.51		0.948171	1.00003		14.3293	0.0184196		0.280889	2.3e-05	1.46725	8.2e-05	1.88692	0.000158	0.008462	0.000434	0.000207	5e-06	7.86693	27	30
NDZ05	N7-17S	53	53	6	2574.58	11.158		0.000705439	0.000101833	0.280934	5.5846e-05	0.280899	-8.13154	2.42202	3449.29		0.948171	1.00003		14.3293	0.0184196		0.280925	2.1e-05	1.46728	6.3e-05	1.88687	0.000177	0.031941	0.00138	0.000744	1.3e-05	7.59038	27	30
NDZ05	N7-17S	42	42	6	2611.09	21.0673		0.000237043	3.41776e-05	0.280889	6.19109e-05	0.280877	-8.0607	2.75457	3474.86		0.948171	1.00003		14.3293	0.0184196		0.28088	3.4e-05	1.46718	6.4e-05	1.88672	0.000174	0.010315	0.000267	0.00025	4e-06	7.24385	30	30
NDZ05	N7-17S	4	4	6	2570.29	18.1393		0.000231354	3.32731e-05	0.280916	5.74669e-05	0.280905	-8.03992	2.52511	3440.95		0.948171	1.00003		14.3293	0.0184196		0.280907	2.5e-05	1.46729	6.7e-05	1.88674	0.000139	0.009528	0.000247	0.000244	3e-06	8.39191	30	30
NDZ05	N7-17S	82	82	6	2626.35	15.0384		0.000193427	5.32876e-05	0.280879	5.93106e-05	0.280869	-7.98288	2.55688	3482.98		0.948171	1.00003		14.3293	0.0184196		0.28087	2.9e-05	1.46725	5.7e-05	1.88692	0.000125	0.008297	0.001841	0.000204	4.8e-05	6.91397	28	30
NDZ05	N7-17S	49	49	6	2620.08	9.3991		0.000550887	7.92166e-05	0.280903	5.66232e-05	0.280875	-7.91392	2.37331	3474.26		0.948171	1.00003		14.3293	0.0184196		0.280894	2.3e-05	1.46728	7.1e-05	1.88669	0.000132	0.023826	0.000704	0.000581	7e-06	7.40994	27	30
NDZ05	N7-17S	57	57	6	2620.52	10.322		0.00153224	0.000234544	0.280955	6.30415e-05	0.280878	-7.80718	2.89461	3468.92		0.948171	1.00003		14.3293	0.0184196		0.280946	3.6e-05	1.46725	8.4e-05	1.88699	0.000164	0.075593	0.003762	0.001616	8.7e-05	5.60131	28	30
NDZ05	N7-17S	28	28	6	2572.84	12.4275		0.000404869	6.68358e-05	0.280932	5.66281e-05	0.280912	-7.71555	2.41988	3425.68		0.948171	1.00003		14.3293	0.0184196		0.280923	2.3e-05	1.46721	5.7e-05	1.88685	0.000127	0.016011	0.00119	0.000427	3.5e-05	8.80955	28	30
NDZ05	N7-17S	66	66	6	2615.39	10.6125		0.00051296	7.43789e-05	0.28091	5.70379e-05	0.280884	-7.70549	2.40746	3459.36		0.948171	1.00003		14.3293	0.0184196		0.280901	2.4e-05	1.46722	5.5e-05	1.8869	0.000136	0.022348	0.000626	0.000541	1.2e-05	8.1258	28	30
NDZ05	N7-17S	47	47	6	2628.2	11.8734		0.000317637	4.86098e-05	0.280898	5.93137e-05	0.280882	-7.48654	2.47366	3457.98		0.948171	1.00003		14.3293	0.0184196		0.280889	2.9e-05	1.46723	5.3e-05	1.88675	0.000155	0.013076	0.000466	0.000335	1.8e-05	8.01778	30	30
NDZ05	N7-17S	46	46	6	2658.25	11.0857		0.000316689	5.35574e-05	0.280879	5.93106e-05	0.280863	-7.46224	2.46557	3480.87		0.948171	1.00003		14.3293	0.0184196		0.28087	2.9e-05	1.46721	7.3e-05	1.88677	0.000155	0.013298	0.000998	0.000334	3e-05	8.00483	29	30
NDZ05	N7-17S	92	92	6	2599.99	10.6963		0.000263591	4.26978e-05	0.280915	6.13714e-05	0.280902	-7.44135	2.50808	3432.87		0.948171	1.00003		14.3293	0.0184196		0.280906	3.3e-05	1.46725	6.3e-05	1.88682	0.000112	0.011193	0.000711	0.000278	2.1e-05	8.33283	29	30
NDZ05	N7-17S	86	86	6	2573.48	11.9902		0.000501582	7.19731e-05	0.280945	6.03242e-05	0.28092	-7.4079	2.5495	3409.76		0.948171	1.00003		14.3293	0.0184196		0.280936	3.1e-05	1.46725	5e-05	1.88685	0.000134	0.022465	0.000282	0.000529	4e-06	7.9761	29	30
NDZ05	N7-17S	78	78	6	2551.53	12.0065		0.000228509	3.32342e-05	0.28095	5.83703e-05	0.280939	-7.26198	2.41365	3384.3		0.948171	1.00003		14.3293	0.0184196		0.280941	2.7e-05	1.46729	5.9e-05	1.88678	0.000106	0.009366	7.2e-05	0.000241	6e-06	9.2985	29	30
NDZ05	N7-17S	121	121	6	793.873	28.0343		0.00115961	0.000166693	0.282097	5.72363e-05	0.28208	-7.18493	2.73044	1970.36		0.948171	1.00003		14.3293	0.0184196		0.282088	2.4e-05	1.46723	4.9e-05	1.88691	0.000104	0.055329	0.001243	0.001223	1.4e-05	8.71449	28	30
NDZ05	N7-17S	115	115	6	2644.62	11.5689		0.000483567	7.09329e-05	0.280906	5.79073e-05	0.280881	-7.11945	2.45638	3451.61		0.948171	1.00003		14.3293	0.0184196		0.280897	2.6e-05	1.46726	6.5e-05	1.88688	0.000157	0.021916	0.001044	0.00051	1.6e-05	7.53596	29	30
NDZ05	N7-17S	94	94	6	2663.34	11.4306		0.00050822	7.29783e-05	0.280899	5.584e-05	0.280873	-6.98024	2.38429	3459.25		0.948171	1.00003		14.3293	0.0184196		0.28089	2.1e-05	1.46721	5.4e-05	1.88682	0.000104	0.022434	0.000677	0.000536	5e-06	8.64431	28	30
NDZ05	N7-17S	22	22	6	2607.44	22.6346		0.000215235	3.15477e-05	0.280923	5.58441e-05	0.280912	-6.89738	2.57084	3409.82		0.948171	1.00003		14.3293	0.0184196		0.280914	2.1e-05	1.4673	6e-05	1.88682	0.000105	0.010011	9.4e-05	0.000227	7e-06	7.11425	27	30
NDZ05	N7-17S	98	98	6	2625.5	10.3316		0.00065803	9.9347e-05	0.280935	5.98149e-05	0.280902	-6.84222	2.54423	3421.41		0.948171	1.00003		14.3293	0.0184196		0.280926	3e-05	1.46721	8.5e-05	1.88677	9.3e-05	0.024052	0.000811	0.000694	3.3e-05	5.80013	29	30
NDZ05	N7-17S	33	33	6	2517.87	11.8044		0.000728195	0.000107218	0.281008	5.74821e-05	0.280973	-6.83871	2.49958	3334.57		0.948171	1.00003		14.3293	0.0184196		0.280999	2.5e-05	1.46726	7.4e-05	1.88681	0.000137	0.032963	0.001528	0.000768	2.6e-05	8.10173	27	30
NDZ05	N7-17S	51	51	6	2589.6	10.0552		0.00023325	3.3423e-05	0.280938	5.88376e-05	0.280926	-6.81126	2.38639	3390.85		0.948171	1.00003		14.3293	0.0184196		0.280929	2.8e-05	1.46727	7e-05	1.88681	0.000126	0.010021	0.000211	0.000246	0	8.18833	28	30
NDZ05	N7-17S	31	31	6	2633.18	11.451		0.000607777	8.71107e-05	0.280932	5.79115e-05	0.280901	-6.68199	2.48131	3419.04		0.948171	1.00003		14.3293	0.0184196		0.280923	2.6e-05	1.46717	7e-05	1.88675	0.000118	0.026309	0.000535	0.000641	2e-06	8.07439	30	30
NDZ05	N7-17S	64	64	6	2594.86	11.0761		0.000407713	5.85453e-05	0.280948	5.548e-05	0.280928	-6.64161	2.33421	3386.02		0.948171	1.00003		14.3293	0.0184196		0.280939	2e-05	1.46711	5.3e-05	1.88674	9.1e-05	0.018817	0.00041	0.00043	4e-06	7.86134	27	30
NDZ05	N7-17S	102	102	6	2617	11.5638		0.000639067	9.58898e-05	0.280948	5.74722e-05	0.280916	-6.5414	2.48261	3398.5		0.948171	1.00003		14.3293	0.0184196		0.280939	2.5e-05	1.46728	4.8e-05	1.8867	0.000115	0.025749	0.001041	0.000674	3e-05	8.13105	27	30
NDZ05	N7-17S	43	43	6	2556.78	10.9854		0.000289192	4.21276e-05	0.28097	5.83736e-05	0.280956	-6.53426	2.40527	3349.61		0.948171	1.00003		14.3293	0.0184196		0.280961	2.7e-05	1.4673	6.3e-05	1.88683	0.000145	0.012299	0.000511	0.000305	8e-06	6.34387	28	30
NDZ05	N7-17S	48	48	6	2633.07	10.4712		0.000260747	3.74112e-05	0.280919	5.9317e-05	0.280906	-6.52397	2.4216	3410.51		0.948171	1.00003		14.3293	0.0184196		0.28091	2.9e-05	1.46723	6.2e-05	1.88685	0.000124	0.010461	0.000204	0.000275	2e-06	7.76451	28	30
NDZ05	N7-17S	103	103	6	2575.35	11.4616		0.000851457	0.000137556	0.280989	5.66377e-05	0.280947	-6.41369	2.51909	3358.12		0.948171	1.00003		14.3293	0.0184196		0.28098	2.3e-05	1.46726	7e-05	1.88685	0.000118	0.035648	0.001917	0.000898	6.7e-05	7.58728	27	30
NDZ05	N7-17S	59	59	6	2589.22	11.4054		0.000690268	0.000104031	0.280975	5.5853e-05	0.280941	-6.3103	2.43322	3363.77		0.948171	1.00003		14.3293	0.0184196		0.280966	2.1e-05	1.46723	5.6e-05	1.88676	8.2e-05	0.032368	0.00147	0.000728	3.4e-05	8.64833	27	30
NDZ05	N7-17S	104	104	6	2595.97	10.4472		0.000728195	0.000104693	0.280973	5.44748e-05	0.280937	-6.29355	2.36357	3368.31		0.948171	1.00003		14.3293	0.0184196		0.280964	1.7e-05	1.46726	6.3e-05	1.88681	0.000164	0.033243	0.000549	0.000768	9e-06	9.5084	27	30
NDZ05	N7-17S	112	112	6	816.799	29.4823		0.000459863	6.60653e-05	0.282098	5.6427e-05	0.282091	-6.26813	2.69359	1938.16		0.948171	1.00003		14.3293	0.0184196		0.282089	2.2e-05	1.46719	6.3e-05	1.88691	0.000124	0.021204	0.000291	0.000485	5e-06	8.83929	29	30
NDZ05	N7-17S	41	41	6	2605.35	12.1191		0.000531924	8.97618e-05	0.28096	5.66328e-05	0.280933	-6.19222	2.45464	3370.45		0.948171	1.00003		14.3293	0.0184196		0.280951	2.3e-05	1.4672	7e-05	1.88683	0.000135	0.023294	0.002107	0.000561	5e-05	8.21566	27	30
NDZ05	N7-17S	123	123	6	2597.35	12.9348		0.00104204	0.000326308	0.280993	5.79216e-05	0.280941	-6.10604	2.93512	3359.39		0.948171	1.00003		14.3293	0.0184196		0.280984	2.6e-05	1.4672	5.3e-05	1.88695	0.000141	0.054134	0.016545	0.001099	0.000306	7.9822	27	30
NDZ05	N7-17S	99	99	6	2966.86	9.38736		0.000913088	0.000133895	0.280754	6.02941e-05	0.280702	-5.9215	2.63544	3647.55		0.948171	1.00003		14.3293	0.0184196		0.280745	3.1e-05	1.46733	5.1e-05	1.88673	0.000128	0.041598	0.000721	0.000963	3e-05	7.08008	30	30
NDZ05	N7-17S	17	17	6	2631.23	16.7415		0.000948171	0.000136934	0.280976	5.62368e-05	0.280928	-5.77241	2.6299	3368.86		0.948171	1.00003		14.3293	0.0184196		0.280967	2.2e-05	1.4672	6.7e-05	1.88678	0.000126	0.043799	0.000363	0.001	1.8e-05	7.78195	27	30
NDZ05	N7-17S	23	23	6	2592.29	14.6013		0.00036789	5.54099e-05	0.280973	5.74763e-05	0.280955	-5.74144	2.48179	3335.81		0.948171	1.00003		14.3293	0.0184196		0.280964	2.5e-05	1.4672	7.4e-05	1.88685	0.000165	0.015964	0.00048	0.000388	1.8e-05	7.75399	29	30
NDZ05	N7-17S	106	106	6	2720.79	10.5764		0.00112738	0.000161614	0.280931	5.62291e-05	0.280872	-5.66208	2.54258	3435.19		0.948171	1.00003		14.3293	0.0184196		0.280922	2.2e-05	1.46721	7.5e-05	1.8868	0.00014	0.052061	0.001513	0.001189	5e-06	8.26277	27	30
NDZ05	N7-17S	65	65	6	2616.59	9.99258		0.000600192	8.78697e-05	0.280974	5.88435e-05	0.280944	-5.5565	2.48101	3345.51		0.948171	1.00003		14.3293	0.0184196		0.280965	2.8e-05	1.46723	5.5e-05	1.88684	0.000136	0.026364	0.000977	0.000633	1.9e-05	7.84496	29	30
NDZ05	N7-17S	52	52	6	2610.32	11.5558		0.000937741	0.000136969	0.280996	5.83778e-05	0.280949	-5.5191	2.58517	3338.45		0.948171	1.00003		14.3293	0.0184196		0.280987	2.7e-05	1.46726	6e-05	1.88695	0.000145	0.04264	0.00235	0.000989	2.8e-05	5.8392	27	30
NDZ05	N7-17S	39	39	6	2583.54	10.9434		0.000406765	6.29222e-05	0.280992	5.54876e-05	0.280972	-5.33691	2.3386	3307.11		0.948171	1.00003		14.3293	0.0184196		0.280983	2e-05	1.46728	6.9e-05	1.88684	0.000138	0.0168	0.00093	0.000429	2.5e-05	9.93961	28	30
NDZ05	N7-17S	81	81	6	2612.66	11.1481		0.000190582	2.73255e-05	0.280965	5.66336e-05	0.280955	-5.23776	2.3237	3325.29		0.948171	1.00003		14.3293	0.0184196		0.280956	2.3e-05	1.46724	5.9e-05	1.88681	0.000118	0.008438	0.000106	0.000201	1e-06	7.18921	27	30
NDZ05	N7-17S	96	96	6	2592.48	19.9748		0.00226234	0.00046869	0.281082	5.62547e-05	0.28097	-5.20694	3.27291	3307.36		0.948171	1.00003		14.3293	0.0184196		0.281073	2.2e-05	1.46725	5.7e-05	1.88685	0.000105	0.108505	0.016363	0.002386	0.000357	8.68176	27	30
NDZ05	N7-17S	15	15	6	2593.29	13.683		0.000589762	8.46415e-05	0.281014	5.70553e-05	0.280985	-4.65181	2.49538	3278.29		0.948171	1.00003		14.3293	0.0184196		0.281005	2.4e-05	1.46722	6.4e-05	1.88684	0.000171	0.028544	0.000672	0.000622	5e-06	10.8096	28	30
NDZ05	N7-17S	1	1	6	769.526	39.7284		0.000648549	9.46623e-05	0.282184	5.95204e-05	0.282175	-4.3711	3.03951	1795.54		0.948171	1.00003		14.3293	0.0184196		0.282175	2.9e-05	1.46726	7.3e-05	1.88687	0.000219	0.025849	0.00129	0.000684	1.9e-05	5.74266	28	30
NDZ05	N7-17S	54	54	6	2619.27	9.12763		0.000624845	0.000105076	0.281013	5.88498e-05	0.280982	-4.1514	2.49215	3272.47		0.948171	1.00003		14.3293	0.0184196		0.281004	2.8e-05	1.46734	5.8e-05	1.88686	0.000152	0.02897	0.001127	0.000659	5.8e-05	8.7175	30	30
NDZ05	N7-17S	77	77	6	2633.18	12.2876		0.000448485	6.52641e-05	0.281008	5.54903e-05	0.280985	-3.69206	2.37654	3259.11		0.948171	1.00003		14.3293	0.0184196		0.280999	2e-05	1.46729	6.5e-05	1.88681	0.00016	0.01694	0.000258	0.000473	1.2e-05	8.17304	27	30
NDZ05	N7-17S	24	24	6	2642.58	15.8635		0.000451329	6.50119e-05	0.281008	5.70543e-05	0.280985	-3.47968	2.51527	3255.32		0.948171	1.00003		14.3293	0.0184196		0.280999	2.4e-05	1.46717	6.8e-05	1.88675	0.000143	0.017276	0.000785	0.000476	7e-06	7.87223	29	30
NDZ05	N7-17S	101	101	6	2647.24	10.2799		0.000851457	0.000162375	0.281029	5.74856e-05	0.280986	-3.34691	2.57485	3251.98		0.948171	1.00003		14.3293	0.0184196		0.28102	2.5e-05	1.46724	6e-05	1.88684	0.00014	0.034546	0.003913	0.000898	0.000113	6.83712	27	30
NDZ05	N7-17S	62	62	6	2629.1	10.4779		0.000596399	9.42828e-05	0.281031	5.70581e-05	0.281001	-3.23348	2.44124	3231.24		0.948171	1.00003		14.3293	0.0184196		0.281022	2.4e-05	1.46722	4.9e-05	1.88685	0.000124	0.026347	0.001208	0.000629	4.2e-05	7.96971	28	30
NDZ05	N7-17S	21	21	6	2593.8	12.8489		0.000594503	9.14237e-05	0.281054	5.79316e-05	0.281024	-3.22542	2.51937	3202.26		0.948171	1.00003		14.3293	0.0184196		0.281045	2.6e-05	1.46722	5.1e-05	1.88685	0.00012	0.024798	0.001244	0.000627	3.5e-05	8.1125	30	30
NDZ05	N7-17S	68	68	6	2617.28	10.6319		0.000380216	5.6555e-05	0.28103	5.62459e-05	0.281011	-3.15584	2.34901	3217.51		0.948171	1.00003		14.3293	0.0184196		0.281021	2.2e-05	1.46723	6.8e-05	1.88683	0.000121	0.016079	0.00051	0.000401	1.6e-05	8.49763	29	30
NDZ05	N7-17S	25	25	6	2806.36	14.7286		0.000349875	5.39439e-05	0.280905	5.7465e-05	0.280886	-3.15012	2.49273	3370.16		0.948171	1.00003		14.3293	0.0184196		0.280896	2.5e-05	1.46729	6.7e-05	1.88669	0.000101	0.01532	0.000605	0.000369	2.1e-05	7.79941	30	30
NDZ05	N7-17S	85	85	6	3416.54	12.906		0.000700698	0.000146146	0.280528	5.50548e-05	0.280482	-3.08458	2.60894	3860.99		0.948171	1.00003		14.3293	0.0184196		0.280519	1.9e-05	1.46718	5.7e-05	1.88687	0.000128	0.027995	0.004709	0.000739	0.000112	7.89799	29	30
NDZ05	N7-17S	97	97	6	2621.49	10.2846		0.000568902	9.15749e-05	0.281052	5.62497e-05	0.281023	-2.61277	2.40278	3191.79		0.948171	1.00003		14.3293	0.0184196		0.281043	2.2e-05	1.46721	6.2e-05	1.88672	0.000133	0.025071	0.001482	0.0006	4.4e-05	7.6744	28	30
NDZ05	N7-17S	19	19	6	2658.74	16.0245		0.000332808	4.76984e-05	0.281061	5.62512e-05	0.281044	-1.00448	2.46121	3135.66		0.948171	1.00003		14.3293	0.0184196		0.281052	2.2e-05	1.4672	6.9e-05	1.88672	0.00014	0.014353	0.000331	0.000351	1e-06	7.72703	27	30
NDZ05	N7-17S	20	20	6	2653.37	34.042		0.000221872	3.37673e-05	0.281059	5.88572e-05	0.281048	-0.999741	2.95073	3131.05		0.948171	1.00003		14.3293	0.0184196		0.28105	2.8e-05	1.46727	5.5e-05	1.88695	0.000117	0.009809	0.000321	0.000234	1.2e-05	7.93804	30	30
NDZ05	N7-17S	5	5	6	2934.27	14.6866		0.00076707	0.000111091	0.280927	5.93183e-05	0.280884	-0.218171	2.67529	3317.13		0.948171	1.00003		14.3293	0.0184196		0.280918	2.9e-05	1.46723	9.7e-05	1.88674	0.000137	0.029016	0.001186	0.000809	1.7e-05	8.22938	29	30
NDZ05	N7-17S	45	45	6	741.577	23.8788		0.00190677	0.000290476	0.282358	5.81464e-05	0.282331	0.551636	2.71653	1500.09		0.948171	1.00003		14.3293	0.0184196		0.282349	2.6e-05	1.46725	5.8e-05	1.88698	0.000114	0.100632	0.004526	0.002011	0.000104	10.8357	29	30
NDZ05	N7-17S	109	109	6	2919.14	11.2302		0.000942482	0.0001359	0.280976	5.44753e-05	0.280923	0.826768	2.46979	3248.92		0.948171	1.00003		14.3293	0.0184196		0.280967	1.7e-05	1.46728	5.9e-05	1.88679	0.00011	0.041261	0.001782	0.000994	1.6e-05	7.74789	27	30
NDZ05	N7-17S	107	107	6	2624.29	13.3238		0.00195892	0.000281779	0.281221	5.70899e-05	0.281122	0.977049	2.83253	3001.17		0.948171	1.00003		14.3293	0.0184196		0.281212	2.4e-05	1.46728	8.4e-05	1.88702	0.000166	0.090184	0.001585	0.002066	2.6e-05	7.24193	28	30
NDZ05	N7-17S	13	13	6	2582.23	17.7988		0.000744314	0.000106806	0.281194	5.517e-05	0.281157	1.22443	2.56024	2953.66		0.948171	1.00003		14.3293	0.0184196		0.281185	1.9e-05	1.46719	5.9e-05	1.8867	0.000138	0.030497	0.000342	0.000785	6e-06	9.75479	27	30
NDZ05	N7-17S	3	3	6	872.539	25.9112		0.00149432	0.000216538	0.282357	6.05475e-05	0.282332	3.54867	2.83607	1439.24		0.948171	1.00003		14.3293	0.0184196		0.282348	3.1e-05	1.46727	5.3e-05	1.8869	0.00014	0.069857	0.001026	0.001576	3.4e-05	7.89527	30	30

## Sheet: Zircon Hf Standards
Session	Run Date	Standard	Samples run	176Hf/177Hf	176Hf/177Hf(n)	± 2s abs	178Hf/177Hf	± 2s abs	180Hf/177Hf	± 2s abs	176Yb/176Hf	± 2s abs	176Lu/176Hf	± 2s abs	on	of
1	2012-11-19	JMC475 undoped	ND41	0.282146	1.00005	7e-06	1.46721	1.4e-05	1.88675	3.5e-05	1e-06	3e-06	0	0	17	19
		JMC475 doped		0.282147	0.282161	2.1e-05	1.46722	3.1e-05	1.88678	9.8e-05	0.064731	0.012787	0.010022	0.00048	15	15
		91500		0.28229	0.282304	4.7e-05	1.46725	6.9e-05	1.88676	0.000205	0.012306	0.002825	0.000313	3.8e-05	25	26
		Plesovice		0.282477	0.282491	2.9e-05	1.46725	7.1e-05	1.88672	2e-05	0.00576	0.003372	9.4e-05	4.9e-05	6	6
		Mud Tank		0.282494	0.282508	3e-06	1.46721	7.6e-05	1.88669	1.9e-05	0.004103	0.00015	8.3e-05	3e-06	3	3
2	2013-12-21	JMC475 undoped	ND41, ETH2a	0.282147	1.00005	6e-06	1.46722	8e-06	1.88677	3.9e-05	2e-06	5e-06	0	0	4	4
		JMC475 doped		0.282144	0.282157	1.9e-05	1.46724	1.3e-05	1.8868	2.3e-05	0.063016	0.003541	0.009958	0.000147	3	3
		91500		0.282295	0.282308	3.9e-05	1.46726	0.0001	1.88677	0.000162	0.011972	0.00185	0.000311	3.2e-05	24	24
		Mud Tank		0.282501	0.282514	3e-05	1.46767	6.7e-05	1.88682	9.6e-05	0.003776	0.000793	8e-05	8e-06	18	18
3	2013-02-09	JMC475 undoped	ND01, ND10, ND35	0.282148	1.00004	1.2e-05	1.46722	2.6e-05	1.88678	8.8e-05	3e-06	4e-06	0	0	21	23
		JMC475 doped		0.282151	0.282163	2.4e-05	1.46722	4.5e-05	1.88678	0.000115	0.255605	0.028416	6e-06	1e-06	18	20
		91500		0.282289	0.282301	3.4e-05	1.46724	7.6e-05	1.88671	0.000185	0.011323	0.004447	0.000295	3.6e-05	48	51
		Mud Tank		0.282499	0.282511	2.9e-05	1.46724	6e-05	1.88675	0.000202	0.003413	0.001025	7.3e-05	1.7e-05	44	49
4	2013-02-10	JMC475 undoped	Tana zircon washes	0.282149	1.00004	7e-06	1.46723	1.6e-05	1.8868	4.1e-05	3e-06	7e-06	0	0	10	10
	Solution only	JMC475 doped		0.282148	0.282159	7e-06	1.46724	1.6e-05	1.8868	5.8e-05	0.132929	0.004354	3e-06	0	6	6
5	2013-04-02	JMC475 undoped	RSH07a	0.282149	1.00004	1.6e-05	1.46723	3e-05	1.88677	5.9e-05	1e-06	3e-06	0	0	9	9
		JMC475 doped		0.282147	0.282158	1.9e-05	1.4672	2.4e-05	1.88675	8.6e-05	0.055134	0.002174	1e-06	0	9	9
		91500		0.282281	0.282292	3.7e-05	1.46722	8.8e-05	1.88679	0.000123	0.012315	0.002106	0.000328	5.3e-05	24	24
		Plesovice		0.282474	0.282485	3.1e-05	1.46728	5.9e-05	1.88674	0.000164	0.006333	0.002065	0.000113	3.7e-05	19	22
		Mud Tank		0.282506	0.282517	2.4e-05	1.46725	4.8e-05	1.88678	0.000101	0.00348	0.000138	7.6e-05	3e-06	19	22
		Zr144 glass		0.282134	0.282145	1e-06	1.46724	6e-06	1.88675	1.8e-05	0.10932	0.010926	0.003142	0.0031	2	2
6	2013-04-03	JMC475 undoped	WN7-17	0.282151	1.00003	2.2e-05	1.46724	2.1e-05	1.88681	6.8e-05	3e-06	5e-06	0	0	8	8
		JMC475 doped		0.282145	0.282154	2.3e-05	1.46723	3.4e-05	1.88679	4.9e-05	0.05509	0.003185	1e-06	0	8	8
		91500		0.282299	0.282308	5.2e-05	1.46721	8.2e-05	1.88676	0.000194	0.012308	0.001953	0.000328	4.7e-05	18	21
		Plesovice		0.282466	0.282475	4e-05	1.46723	0.00012	1.88676	0.000164	0.006588	0.002432	0.00012	4.5e-05	18	20
		Mud Tank		0.282507	0.282516	2.9e-05	1.46725	6.3e-05	1.88681	0.000106	0.003489	0.000225	7.7e-05	4e-06	18	20
		Zr144 glass		0.282147	0.282156	1e-05	1.46724	1.9e-05	1.88679	8.6e-05	0.092221	0.027307	0.00273	0.000801	3	3
7	2013-05-01	JMC475 undoped	SD04	0.28215	1.00004	1.4e-05	1.46723	2.8e-05	1.8868	6.9e-05	0	2e-06	0	0	10	10
		JMC475 doped		0.282152	0.282162	1e-05	1.46721	3e-05	1.88668	0.000138	0.058625	0.002534	1e-06	0	9	9
		91500		0.282293	0.282303	7.9e-05	1.46722	0.000154	1.8868	0.000269	0.011251	0.000893	0.000312	1.8e-05	13	13
		Plesovice		0.282467	0.282477	4.2e-05	1.46728	0.000164	1.88681	0.000252	0.005443	0.001425	9.9e-05	2.3e-05	10	10
		Mud Tank		0.282507	0.282517	2.8e-05	1.46722	6.2e-05	1.88677	0.000275	0.003431	0.00013	8.5e-05	3e-06	11	13
8	2013-10-22	JMC475 undoped	SD03	0.282139	1.00007	3.4e-05	1.46724	9.8e-05	1.88687	0.000236	7e-06	1.1e-05	0	1e-06	10	10
		JMC475 doped		0.282127	0.282148	2.3e-05	1.46727	5.3e-05	1.88692	9.2e-05	0.042137	0.003224	4e-06	1e-06	9	10
		91500		0.28227	0.282291	3.2e-05	1.46725	6.4e-05	1.88689	9.9e-05	0.009811	0.000297	0.000287	1.3e-05	15	16
		Mud Tank		0.282474	0.282495	1.7e-05	1.46724	4.8e-05	1.88687	0.000177	0.000196	1.4e-05	5e-06	0	15	16
9	2013-12-12	JMC475 undoped	WD04	0.28215	1.00004	1.23288e-05	1.46722	1.96178e-05	1.88679	2.39747e-05	6.25e-07	5.65054e-06	0	0	8	8
		JMC475 doped		0.282156	0.282166	6.27353e-06	1.46721	1.53227e-05	1.88678	6.51767e-05	0.0613201	0.0045686	2e-06	0	8	8
		91500		0.28229	0.2823	2.73159e-05	1.46724	4.34853e-05	1.88683	0.000105458	0.0118232	0.0012342	0.000320704	1.1406e-05	25	28
		Mud Tank		0.282496	0.282506	3.48674e-05	1.46721	6.68574e-05	1.88685	0.00017079	0.0038023	0.000607567	8.04231e-05	3.62979e-06	27	27
		Plesovice		0.282465	0.282475	8.43801e-06	1.46722	4.63336e-05	1.88681	0.000110766	0.0063962	0.0015787	0.0001198	2.96108e-05	5	5
10	2014-03-28	JMC475 undoped	SD02, RSH14a	0.282153	1.00002	1.6e-05	1.46725	2.22678e-05	1.8868	3.4444e-05	1.55e-05	1.73837e-05	7.74194e-07	8.50047e-07	32	32
		JMC475 doped		0.282147	0.282154	1.10645e-05	1.46724	1.68307e-05	1.88679	5.36936e-05	0.0539517	0.00302916	1e-06	4.44188e-22	12	12
		91500		0.282297	0.282304	4.25874e-05	1.46729	9.26433e-05	1.88676	0.000135297	0.0127247	0.00190154	0.000361875	1.684e-05	27	27
		Mud Tank		0.282501	0.282508	3.17183e-05	1.46727	6.41233e-05	1.88677	0.000147277	0.00300679	0.000806869	7.26786e-05	2.52751e-05	28	28
		Plesovice		0.282464	0.282471	2.08998e-05	1.46728	4.13376e-05	1.88682	0.000214859	0.00315117	0.00078388	6.11667e-05	1.57692e-05	6	6
11	2014-04-10	JMC475 undoped	SD04	0.282145	1.00005	9.59166e-06	1.46722	3.1785e-05	1.88681	5.17871e-05	-1.66667e-07	6.121e-06	0	0	7	7
		JMC475 doped		0.282153	0.282168	7.86554e-06	1.46723	2.68506e-05	1.88681	4.54585e-05	0.0618058	0.00079007	2e-06	0	6	7
		91500		0.282286	0.282301	2.08714e-05	1.46724	7.39099e-05	1.88686	0.000138733	0.0105353	0.00080761	0.000308931	1.7824e-05	29	33
		Plesovice		0.282468	0.282483	2.05518e-05	1.46724	3.36995e-05	1.88681	9.75208e-05	0.00669314	0.00290698	0.000130069	5.26116e-05	26	29
		Zr141 glass		0.282147	0.282162	2.54822e-05	1.46724	4.56099e-05	1.8868	0.000127765	0.0778922	0.0343645	0.00266853	0.00124025	14	15
		Zr142 glass		0.282196	0.282211	1.88591e-05	1.46724	5.91354e-05	1.88683	0.000153357	0.119015	0.00294075	0.0046755	5.47601e-05	4	4
		Zr144 glass		0.282316	0.282331	8.25974e-05	1.46729	8.33367e-05	1.88682	0.000111754	0.335979	0.012721	0.0125313	0.000335513	4	4
12	2014-05-29	JMC475 undoped	Tana zircon washes	0.282126	1.00012	1e-05	1.46722	1.20526e-05	1.88664	3.51453e-05	1e-06	4e-06	0	0	17	17
13	2014-05-31	JMC475 undoped	Young grains	0.282124	1.00013	3.8e-05	1.46722	7.1e-05	1.88657	9.64628e-05	1.66667e-06	9.93311e-06	0	0	6	6
		JMC475 doped		0.282133	0.282169	1.83848e-05	1.46723	1.27279e-05	1.88659	1.83848e-05	0.0232005	0.000657609	1e-06	0	2	2
		91500		0.282284	0.28232	2.23944e-05	1.46719	6.04906e-05	1.88655	0.000121261	0.0097958	0.00163039	0.000310333	2.44949e-06	10	10
		Plesovice		0.282446	0.282482	2.75458e-05	1.46721	4.82428e-05	1.88659	6.94e-05	0.00485654	0.00143716	0.000106583	2.18667e-05	13	13
		Zr141 glass		0.282145	0.282181	3.2291e-05	1.46723	5.74824e-05	1.88658	9.95369e-05	0.0824418	0.0549861	0.0026416	0.00174026	10	10
		Zr142 glass		0.282203	0.282239	2.18449e-05	1.46723	5.72014e-05	1.88657	8.88639e-05	0.12677	0.00456056	0.0047172	0.00020358	5	5
14	2014-09-13	JMC475 undoped	Kalashnikov	0.282153	1.00003	7.98123e-06	1.46722	1.16919e-05	1.8867	4.41984e-05	8.8e-06	3.03315e-06	1e-06	0	5	5
		JMC475 doped		0.282142	0.282149	6.55744e-06	1.4672	1.67033e-05	1.88669	5e-06	0.0401797	9.72951e-05	2e-06	0	3	3
		91500		0.282309	0.282316	2.46252e-05	1.46734	4.76231e-05	1.8865	0.000193235	0.010549	0.000339454	0.0003848	6.19677e-06	10	10
		Mud Tank		0.282507	0.282514	2.08009e-05	1.46734	4.66066e-05	1.88657	7.90036e-05	0.0018263	1.36141e-05	5.3e-05	0	10	10
		Plesovice		0.282476	0.282484	1.30814e-05	1.46731	1.854e-05	1.88665	5.0802e-05	0.0033027	0.000169196	8e-05	4.10961e-06	10	10
15.1	2014-10-14	JMC475 undoped	RSH & WD	0.282152	1.00003	1.44809e-05	1.46722	4.4414e-05	1.88676	8.31158e-05	1.5e-06	6.9544e-06	0	0	12	12
		JMC475 doped		0.282159	0.282167	1.71681e-05	1.46723	2.79203e-05	1.88677	5.46978e-05	0.0755851	0.0826063	1.9375e-06	1.5438e-06	15	16
		91500		0.282303	0.282312	3.67569e-05	1.46724	9.6924e-05	1.88676	0.000148581	0.0134238	0.00272196	0.000312333	5.27282e-05	6	6
		Mud Tank		0.28251	0.282518	1.46833e-05	1.46726	7.56272e-05	1.8867	8.30494e-05	0.00267633	0.000144989	5.3e-05	1.4846e-20	6	6
		Plesovice		0.282485	0.282493	3.21683e-05	1.46726	7.05455e-05	1.88674	0.000104074	0.00547917	0.000504258	8.43333e-05	1.15007e-05	6	6
15.2	2014-10-14	JMC475 undoped	RSH & WD	0.282152	1.00003	1.44809e-05	1.46722	4.4414e-05	1.88676	8.31158e-05	1.5e-06	6.9544e-06	0	0	12	12
IOLITE		JMC475 doped		0.282159	0.282167	1.71681e-05	1.46723	2.79203e-05	1.88677	5.46978e-05	0.0755851	0.0826063	1.9375e-06	1.5438e-06	15	16
Using		91500		0.282306		2.67513e-05	1.46727	5.2396e-05	1.88678	0.000157134	0.0144163	0.00225898	0.000311018	9.483e-06	57	64
91500		Mud Tank		0.28251		2.16494e-05	1.46727	6.17842e-05	1.88678	0.000112018	0.00267418	9.41914e-05	4.66786e-05	9.14174e-06	28	32
		Plesovice		0.282477		2.28993e-05	1.46727	4.52985e-05	1.88679	8.2452e-05	0.005152	0.00220248	7.05714e-05	3.75092e-05	31	32
					0.282305	Mean of 91500 in sessions 1-15
					7.95661e-06
					n=10
					28.1845	ppm	(1-sigma)

## Sheet: Zircon Hf Standards Summary
		JMC475 undoped			91500 (normalised to 176Hf/177Hf = 0.282160 for JMC475)
Session		176Hf/177Hf(m)	± 2s abs		176Lu/177Hf(m)	± 2s abs	2σ LuHf%	176Hf/177Hf(N)	± 2s abs	2σ HfHf%		F(LuHf)	F(JMC)		F(LuHf) = correction factor relative to 176Lu/177Hf = 0.000311 for 91500 (Woodhead et al.)
1	2012-11-19	0.282146	7e-06		0.000313	3.8e-05	12.1406	0.282304	4.7e-05	0.0166487		0.99361	1.00005		F(JMC) = correction factor relative to 176Hf/177Hf = 0.282160 (Nowell et al.)
2	2013-12-21	0.282147	6e-06		0.000311	3.2e-05	10.2894	0.282308	3.9e-05	0.0138147		1	1.00005		2σ LuHf% = 2-sigma % uncertainty on 176Lu177Hf, based on analysis of 91500.
3	2013-02-09	0.282148	1.2e-05		0.000295	3.6e-05	12.2034	0.282301	3.4e-05	0.0120439		1.05424	1.00004		2σ HfHf% = 2-sigma % uncertainty on 176Hf/177Hf. Based on reproducibility of 91500 in each session.
4	2013-02-10	0.282149	7e-06									1	1.00004
5	2013-04-02	0.282149	1.6e-05		0.000328	5.3e-05	16.1585	0.282292	3.7e-05	0.013107		0.948171	1.00004
6	2013-04-03	0.282151	2.2e-05		0.000328	4.7e-05	14.3293	0.282308	5.2e-05	0.0184196		0.948171	1.00003
7	2013-05-01	0.28215	1.4e-05		0.000312	1.8e-05	5.76923	0.282303	7.9e-05	0.0279841		0.996795	1.00004
8	2013-10-22	0.282139	3.4e-05		0.000287	1.3e-05	4.52962	0.282291	3.2e-05	0.0113358		1.08362	1.00007
9	2013-12-12	0.28215	1.2e-05		0.000320704	1.1e-05	3.42996	0.2823	2.73159e-05	0.0097		0.969742	1.00004
10	2014-03-28	0.282153	6e-06		0.000362	1.7e-05	4.69613	0.282304	4.25874e-05	0.0151		0.859116	1.00002
11	2014-04-10	0.282145	1e-05		0.000309	1.8e-05	5.82524	0.282301	2.1e-05	0.0074		1.00647	1.00005
12	2014-05-29	0.282126	1e-05									1	1.00012
13	2014-05-31	0.282124	3.8e-05		0.000310333	2.44949e-06	0.789309	0.28232	2.23944e-05	0.0065		1.00215	1.00013
14	2014-09-13	0.282153	8e-06		0.0003848	6.19677e-06	1.61039	0.282316	2.46252e-05	0.0069054		0.808212	1.00002
15.1	2014-10-16	0.282152	0.00014		0.000312	5.3e-05	16.9872	0.282312	3.7e-05	0.00991439		0.996795	1.00003
15.2	2014-10-16				Iolite used
Other standard values normalised to JMC475 = 0.282160
Session	JMC475 doped	176Hf/177Hf(N)	± 2s abs	± 2s %
1	2012-11-19	0.282161	2.1e-05	0.00744256
2	2013-12-21	0.282157	1.9e-05	0.00673384
3	2013-02-09	0.282163	2.4e-05	0.00850572
4	2013-02-10	0.282157	7e-06	0.00248089
5	2013-04-02	0.282158	1.9e-05	0.00673382
6	2013-04-03	0.282154	2.3e-05	0.00815158
7	2013-05-01	0.282162	1e-05	0.00354406
8	2013-10-22	0.282148	2.3e-05	0.00815175
9	2013-12-12	0.282166	6e-06	0.00212641
10	2014-03-28	0.282154	1.10645e-05	0.00392146
11	2014-04-10	0.282168	8e-06	0.00283519
12	2014-05-29
13	2014-05-31	0.282169	1.83848e-05	0.00651553
14	2014-09-13	0.282149	6.55744e-06	0.0023241
15.1	2014-10-16	0.282167	1.7e-05	0.0060248
	91500	176Hf/177Hf(N)	± 2s abs	± 2s %
1	2012-11-19	0.282304	4.7e-05	0.0166487
2	2013-12-21	0.282308	3.9e-05	0.0138147
3	2013-02-09	0.282301	3.4e-05	0.0120439
5	2013-04-02	0.282292	3.7e-05	0.013107
6	2013-04-03	0.282308	5.2e-05	0.0184196
7	2013-05-01	0.282303	7.9e-05	0.0279841
8	2013-10-22	0.282291	3.2e-05	0.0113358
9	2013-12-12	0.2823	2.73159e-05	0.0096762
10	2014-03-28	0.282304	4.25874e-05	0.0150857
11	2014-04-10	0.282301	2.1e-05	0.00743887
13	2014-05-31	0.28232	2.23944e-05	0.0079323
14	2014-09-13	0.282316	2.46252e-05	0.00872256
15.1	2014-10-16	0.282312	3.7e-05	0.0131061
	Plesovice	176Hf/177Hf(N)	± 2s abs	± 2s %
1	2012-11-19	0.282491	2.9e-05	0.0102658
2	2013-04-02	0.282485	3.1e-05	0.010974
3	2013-04-03	0.282475	4e-05	0.0141605
7	2013-05-01	0.282477	4.2e-05	0.0148685
9	2013-12-12	0.282475	8.43801e-06	0.00298717
10	2014-03-28	0.282471	2.08998e-05	0.0073989
11	2014-04-10	0.282483	2.05518e-05	0.0072754
13	2014-05-31	0.282482	2.75458e-05	0.00975133
14	2014-09-13	0.282484	1.30814e-05	0.00463084
15.1	2014-10-16	0.282493	3.2e-05	0.0113277
15.2	2014-10-16	0.282477	2.3e-05	0.00814226
	Mud Tank	176Hf/177Hf(N)	± 2s abs	± 2s %
1	2012-11-19	0.282508	3e-06	0.00106192
2	2013-12-21	0.282514	3e-05	0.0106189
3	2013-02-09	0.282511	2.9e-05	0.0102651
5	2013-04-02	0.282517	2.4e-05	0.00849506
6	2013-04-03	0.282516	2.9e-05	0.0102649
7	2013-05-01	0.282517	2.8e-05	0.00991091
8	2013-10-22	0.282495	1.7e-05	0.00601781
9	2013-12-12	0.282506	3.48674e-05	0.0123422
10	2014-03-28	0.282508	3.17183e-05	0.0112274
14	2014-09-13	0.282514	2.08009e-05	0.00736279
15.1	2014-10-16	0.282518	1.5e-05	0.0053094
15.2	2014-10-16	0.28251	2.2e-05	0.00778733
